# Supplementary material
Source: PubMed Central journal article supplement (PMC6542567)
Supplement: NIHMS1029757-supplement-supplement.pdf [file NIHMS1029757-supplement-supplement.pdf]

**C–H Functionalization of Amines *via* Alkene-Derived Nucleophiles through  
Cooperative Action of Chiral and Achiral Lewis Acid Catalysts:  
Applications in Enantioselective Synthesis**

*Ming Shang,<sup>‡</sup> Jessica Z. Chan,<sup>‡</sup> Min Cao, Yejin Chang, Qifan Wang, Brennan Cook,  
Sebastian Torker, and Masayuki Wasa\**

*Department of Chemistry, Merkert Chemistry Center, Boston College, Chestnut Hill,  
Massachusetts 02467, United States*

|                                                                                                                                                  |       |
|--------------------------------------------------------------------------------------------------------------------------------------------------|-------|
| 1. Procedures, Materials and Instrumentation                                                                                                     | S-3   |
| 2. Experimental Section                                                                                                                          | S-5   |
| 2.1 Substrate Preparation                                                                                                                        | S-5   |
| 2.2 Optimization Studies                                                                                                                         | S-13  |
| 2.3 General Procedures for the Stereoselective Coupling of <i>N</i> -Alkylamines and $\alpha,\beta$ -Unsaturated Molecules                       | S-19  |
| 3. Analytical Data                                                                                                                               | S-20  |
| 3.1 Characterization of Chiral Ligands                                                                                                           | S-20  |
| 3.2 Characterization of Mannich Products                                                                                                         | S-23  |
| 4. Procedure for Large Scale Reaction, Determination of Absolute Configuration, Derivatizations of the Mannich Products, and Control Experiments | S-107 |
| 4.1 Procedure for the Large Scale Reaction                                                                                                       | S-107 |
| 4.2 Determination of the Absolute Configuration                                                                                                  | S-109 |
| 4.3 Derivatizations of the Enantioenriched Mannich Products                                                                                      | S-112 |
| 4.4 Effect of Mg(OTf) <sub>2</sub> /L4 Co-Catalyst in the Diastereoselective C–C Bond Forming Reactions                                          | S-122 |
| 5. Kinetics Experiment Data for B(C <sub>6</sub> F <sub>5</sub> ) <sub>3</sub> -Catalyzed C–C Bond Forming Reactions                             | S-124 |
| 6. Density Functional Theory (DFT) Calculations                                                                                                  | S-128 |

|     |                                                                              |       |
|-----|------------------------------------------------------------------------------|-------|
| 6.1 | Challenges and Simplifications                                               | S-128 |
| 6.2 | The Stereochemical Model                                                     | S-130 |
| 6.3 | Steric Influence of the <i>para</i> -Substituent on Diastereoselectivity     | S-130 |
| 6.4 | Comparison of Results with Various Density Functionals                       | S-131 |
| 7.  | References                                                                   | S-144 |
| 8.  | NMR Spectra for New Compounds                                                | S-148 |
| 9.  | X-Ray Crystallography Data of <b>5d-major</b> and <b>5d-minor</b>            | S-216 |
| 10. | Coordinates after optimization with M06-L/DF-def2-SVP <sub>DCM(IEFPCM)</sub> | S-250 |

## 1. Procedures, Materials and Instrumentation

### 1.1 General Experimental Procedures

All reactions were performed in standard, oven-dried glassware fitted with rubber septa under an inert atmosphere of nitrogen unless otherwise described. Stainless steel syringes or cannulas were used to transfer air- and moisture-sensitive liquids. Reported concentrations refer to solution volumes at room temperature. Evaporation and concentration *in vacuo* were performed using house vacuum (ca. 40 mm Hg). Column chromatography was performed with SiliaFlash® 60 (40–63 micron) silica gel from Silicycle. Thin layer chromatography (TLC) was used for reaction monitoring and product detection using pre-coated glass plates covered with 0.25 mm silica gel with fluorescent indicator; visualization by UV light ( $\lambda_{\text{ex}} = 254 \text{ nm}$ ) or  $\text{KMnO}_4$  stain.

### 1.2 Materials

Reagents were purchased in reagent grade from commercial suppliers and used without further purification, unless otherwise described.  $\text{H}_2\text{O}$ , in synthetic procedures, refers to distilled water. Chiral ligands were prepared accordingly to the procedures previously reported in the literature.<sup>1</sup>

### 1.3 Instrumentation

Proton nuclear magnetic resonance ( $^1\text{H}$  NMR) spectra and proton-decoupled carbon nuclear magnetic resonance ( $^{13}\text{C}$   $\{^1\text{H}\}$  NMR) spectra were recorded at 25°C (unless stated otherwise) on Inova 600 (600 MHz) or Varian Unity/Inova 500 (500 MHz) or Oxford AS400 (400 MHz) spectrometers at the Boston College nuclear magnetic resonance facility. Chemical shifts for protons are reported in parts per million downfield from tetramethylsilane and are referenced to residual protium in the NMR solvent. Chemical shifts for carbon are reported in parts per million downfield from tetramethylsilane and are referenced to the carbon resonances of the solvent. The solvent peak was referenced to 0 ppm for  $^1\text{H}$  for tetramethylsilane and 77.0 ppm for  $^{13}\text{C}$  for  $\text{CDCl}_3$ . Data are represented as follows: chemical shift, integration, multiplicity (br = broad, s = singlet, d = doublet, t = triplet, q = quartet, qn = quintet, sp = septet, m = multiplet), coupling constants in Hertz (Hz).

Optical rotations were measured using a 1 mL cell with a 5 cm path length on a Rudolph Research Analytical Autopol IV Polarimeter. Infrared spectra were recorded on a Bruker FT-IR Alpha (ATR mode) spectrophotometer. Data are represented as follows: frequency of absorption ( $\text{cm}^{-1}$ ). High-resolution mass spectrometry was performed on a JEOL AccuTOF-DART (positive mode) or Agilent 6220 TOF-ESI (positive mode) at the Mass Spectrometry Facility, Boston College. Chiral HPLC analyses were carried using Agilent 1200 series instruments with Daicel CHIRALPAK® columns or Daicel CHIRALCEL® columns (internal diameter 4.6 mm, column length 250 mm, particle size 5  $\mu\text{m}$ ).

#### 1.4 Abbreviations Used

Bn = benzyl, Boc = *tert*-butoxycarbonyl, DART = direct analysis in real time, DCM = dichloromethane, dr = diastereomeric ratio, er = enantiomeric ratio, ESI = electrospray ionization, Et<sub>2</sub>O = diethyl ether, Et<sub>3</sub>N = triethylamine, EtOAc = ethyl acetate, H<sub>2</sub>O = water, HPLC = high pressure liquid chromatography, HR = high-resolution, LC = liquid chromatography, MS = mass spectrometry, NA = not applicable, PTLC = preparative thin layer chromatography, TBS = *tert*-butyldimethylsilyl, Tf = trifluoromethanesulfonate, THF = tetrahydrofuran, TOF = time-of-flight.



## 2. Experimental Section

### 2.1 Substrate Preparation

Table SI-1. List of Amine Substrates

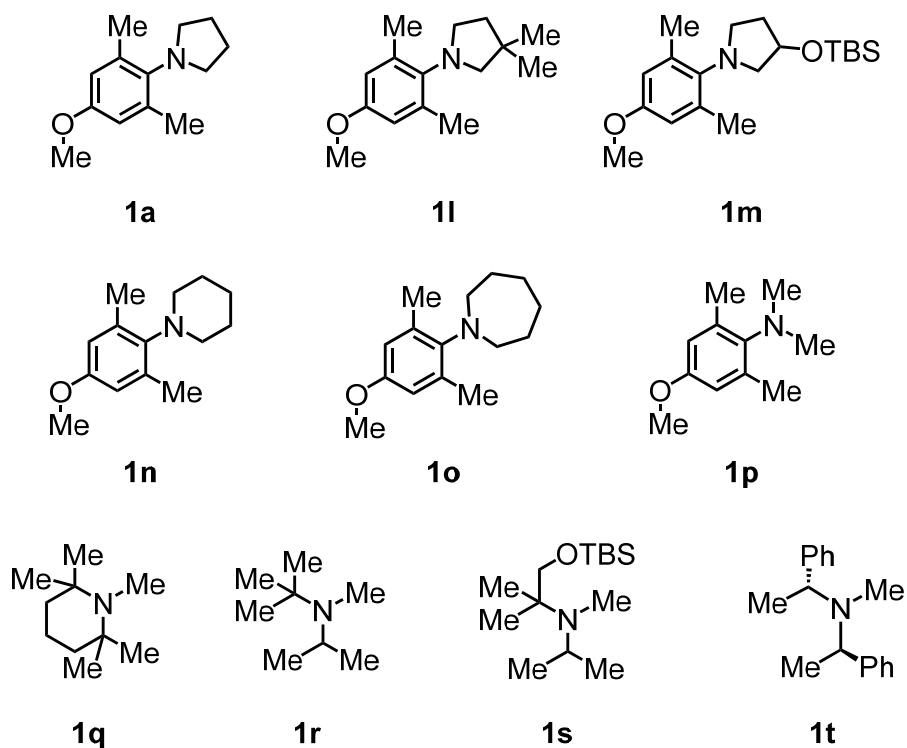

Amines **1q** and **1r** were obtained from commercial sources. Substrates **1a**,<sup>2</sup> **1l**,<sup>2</sup> **1m**,<sup>2</sup> **1n**,<sup>2</sup> **1o**,<sup>2</sup> **1p**,<sup>3</sup> **1s**<sup>4-6</sup> and **1t**<sup>7,8</sup> were prepared accordingly to the literature procedures. The spectroscopic data for the newly synthesized molecules (**1a**, **1l**, **1m**, **1n**, **1o**, **1p**, **1s**, and **1t**) are described as the following.

## Preparation of Amine Substrates<sup>9,10</sup>

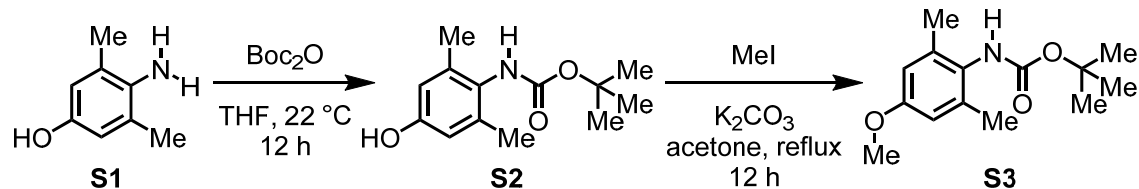

**tert-Butyl (4-hydroxy-2,6-dimethylphenyl)carbamate (S2):** *tert*-Butyl (4-hydroxy-2,6-dimethylphenyl)carbamate was prepared following a known procedure.<sup>9</sup> To a solution of 4-amino-3,5-dimethylphenol (S1, 10.0 g, 72.9 mmol) in THF (200 mL), was added di-*tert*-butyl dicarbonate (16.7 mL, 72.9 mmol) in a dropwise manner. The reaction mixture was allowed to stir at 22 °C for 12 hours. Upon completion, the reaction mixture was concentrated and used without further purification. The spectroscopic data of S2 matched those reported by Nam.<sup>10</sup>

**tert-Butyl (4-methoxy-2,6-dimethylphenyl)carbamate (S3):** *tert*-Butyl (4-methoxy-2,6-dimethylphenyl)carbamate was prepared following a known procedure.<sup>11</sup> Carbamate S2 (8.6 g, 36.4 mmol) was dissolved in acetone (50 mL). To the solution was added potassium carbonate (6.1 g, 54.6 mmol) and iodomethane (2.3 mL, 36.4 mmol), dropwise. The reaction mixture was heated to reflux and allowed to stir for 12 hours. Upon completion (monitored by TLC), the reaction was quenched with a saturated aqueous solution of KOH (50 mL), extracted with Et<sub>2</sub>O (3 x 50 mL), dried (MgSO<sub>4</sub>), and concentrated *in vacuo*. The crude reaction mixture was subjected to silica gel chromatography to afford a colorless solid (5.9 g, 65% yield). <sup>1</sup>H NMR (400 MHz, CDCl<sub>3</sub>) δ 6.60 (s, 2H), 3.76 (s, 3H), 2.24 (s, 6H), 1.49 (s, 9H).

## Procedure for the Removal of *N*-Boc Group<sup>12</sup>

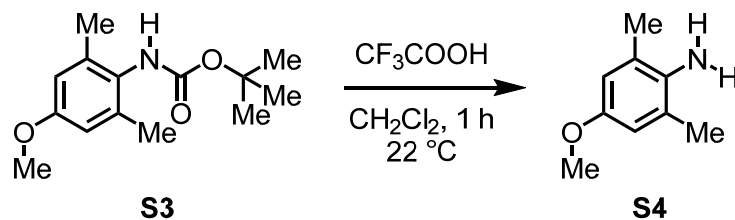

To a solution of carbamate S3 in DCM (0.3 M), CF<sub>3</sub>COOH (5.0 equiv.) was added dropwise at 22 °C. Upon completion of the reaction (monitored by TLC), aqueous NaHCO<sub>3</sub> was added

until the solution was alkaline, extracted with DCM, dried (MgSO<sub>4</sub>), filtered, and concentrated. The crude reaction mixture was subjected to silica gel chromatography (hexanes/EtOAc = 19:1) to give the product as a yellow liquid. The spectroscopic data of **S4** matched those reported by Organ.<sup>13</sup>

### General Procedure for Cyclic Amine Substrates

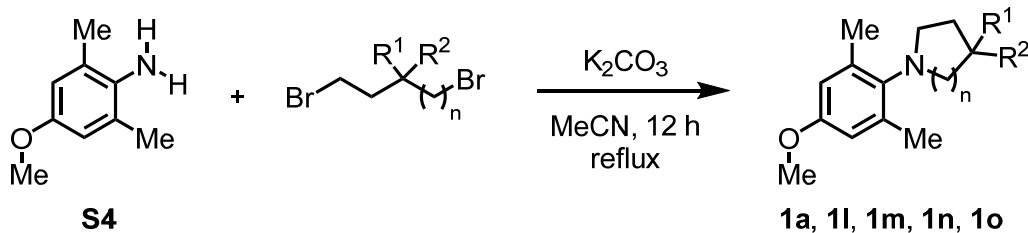

#### 1-(4-Methoxy-2,6-dimethylphenyl)pyrrolidine (**1a**)

1-(4-Methoxy-2,6-dimethylphenyl)pyrrolidine was prepared following a known procedure.<sup>2</sup> A mixture of aniline **S4** (1.0 g, 6.6 mmol), K<sub>2</sub>CO<sub>3</sub> (2.7 g, 19.8 mmol), and 1,4-dibromobutane (1.2 mL, 9.9 mmol) in acetonitrile (10 mL) was heated to reflux for 12 hours. Upon completion, the reaction mixture was quenched with saturated aqueous solution of NaHCO<sub>3</sub>, extracted with EtOAc (3 x 25 mL), dried (MgSO<sub>4</sub>), filtered, and concentrated *in vacuo*. The crude reaction mixture was subjected to silica gel chromatography (hexanes/EtOAc = 29:1) to give the product as a yellow liquid (1.1 g, 82%). <sup>1</sup>H NMR (500 MHz, CDCl<sub>3</sub>) δ 6.58 (s, 2H), 3.75 (s, 3H), 3.20 – 3.08 (m, 4H), 2.23 (s, 6H), 1.99 – 1.90 (m, 4H).

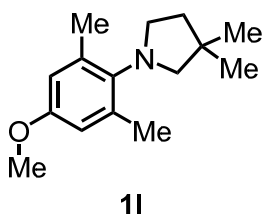

#### 1-(4-Methoxy-2,6-dimethylphenyl)-3,3-dimethylpyrrolidine (**1l**)

1-(4-Methoxy-2,6-dimethylphenyl)-3,3-dimethylpyrrolidine was synthesized using the **General Procedure for Cyclic Amine Substrates** on a 5.9 mmol scale, using 1,4-dibromo-2,2-dimethylbutane. The product was obtained as a colorless liquid (1.2 g, 88%). <sup>1</sup>H NMR

(600 MHz, CDCl<sub>3</sub>)  $\delta$  6.57 (s, 2H), 3.75 (s, 3H), 3.25 (t,  $J$  = 6.9 Hz, 2H), 2.90 (s, 2H), 2.24 (s, 6H), 1.73 (t,  $J$  = 6.9 Hz, 2H), 1.18 (s, 6H).

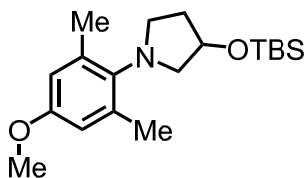

**1m**

**3-((*tert*-Butyldimethylsilyl)oxy)-1-(4-methoxy-2,6-dimethylphenyl)pyrrolidine (**1m**)**

3-((*tert*-Butyldimethylsilyl)oxy)-1-(4-methoxy-2,6-dimethylphenyl)pyrrolidine was synthesized using the **General Procedure for Cyclic Amine Substrates** on a 16.5 mmol scale, using *tert*-butyl((1,4-dibromobutan-2-yl)oxy)dimethylsilane. The product was obtained as a colorless liquid (4.9 g, 89%). <sup>1</sup>H NMR (500 MHz, CDCl<sub>3</sub>)  $\delta$  6.57 (s, 2H), 4.48 (tt,  $J$  = 5.2, 3.5 Hz, 1H), 3.75 (s, 3H), 3.41 – 3.35 (m, 2H), 3.08 (td,  $J$  = 7.8, 4.1 Hz, 1H), 3.02 (dd,  $J$  = 8.9, 3.1 Hz, 1H), 2.25 (s, 6H), 2.12 – 2.04 (m, 1H), 1.92 – 1.85 (m, 1H), 0.90 (s, 9H), 0.09 (s, 3H), 0.07 (s, 3H).

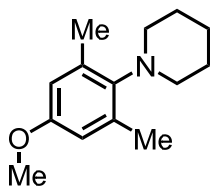

**1n**

**1-(4-Methoxy-2,6-dimethylphenyl)piperidine (**1n**)**

1-(4-Methoxy-2,6-dimethylphenyl)piperidine was prepared using the **General Procedure for Cyclic Amine Substrates** on 1.0 mmol scale, using 1,5-dibromopentane. The product was obtained as a white solid (165 mg, 75%). <sup>1</sup>H NMR (500 MHz, CDCl<sub>3</sub>)  $\delta$  6.52 (s, 2H), 3.74 (s, 3H), 2.98 (t,  $J$  = 5.1 Hz, 4H), 2.29 (s, 6H), 1.65 – 1.58 (m, 4H), 1.58 – 1.51 (m, 2H).

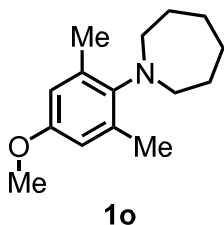

#### 1-(4-Methoxy-2,6-dimethylphenyl)azepane (**1o**)

1-(4-Methoxy-2,6-dimethylphenyl)azepane was prepared using the **General Procedure for Cyclic Amine Substrates** on 4.7 mmol scale, using 1,6-dibromohexane. The product was obtained as a colorless oil (371 mg, 34%). <sup>1</sup>H NMR (500 MHz, CDCl<sub>3</sub>) δ 6.56 (s, 2H), 3.75 (s, 3H), 3.09 – 3.01 (m, 4H), 2.29 (s, 6H), 1.70 (s, 8H).

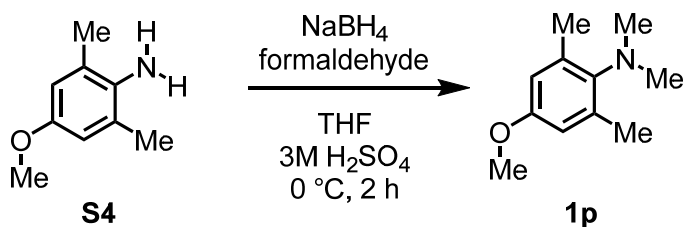

#### 4-Methoxy-*N,N*,2,6-tetramethylaniline (**1p**)

4-Methoxy-*N,N*,2,6-tetramethylaniline was prepared following a known procedure.<sup>3</sup> To a solution of formaldehyde (37% aq. solution, 2.95 mL, 39.7 mmol) and sulfuric acid (3 M, 15.9 mmol) was added 4-methoxy-2,6-dimethylaniline **S4** (1.0 g, 6.6 mmol) in THF (50 mL) at 0 °C. Subsequently, NaBH<sub>4</sub> (1.75 g, 46.3 mmol) was added in portions to the reaction mixture while cooling. Upon completion of the reaction (monitored by TLC), the crude reaction mixture was made basic with aq. NaOH (1 M). The supernatant was decanted and the residue is treated with water (10 mL) and extracted with Et<sub>2</sub>O (3 x 20 mL). The combined organic layers were dried (MgSO<sub>4</sub>), filtered, and concentrated *in vacuo*. The crude reaction mixture was subjected to silica gel chromatography (hexanes/EtOAc = 9:1) and amine **1p** was obtained as a colorless oil (1.1 g, 94%). <sup>1</sup>H NMR (400 MHz, CDCl<sub>3</sub>) δ 6.54 (s, 2H), 3.75 (s, 3H), 2.79 (s, 6H), 2.28 (s, 6H).

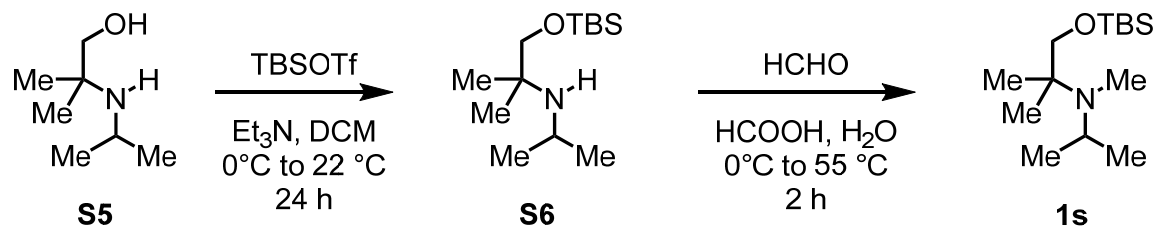

**1-((*tert*-Butyldimethylsilyl)oxy)-*N*-isopropyl-2-methylpropan-2-amine (S6)**

1-((*tert*-Butyldimethylsilyl)oxy)-*N*-isopropyl-2-methylpropan-2-amine was prepared following a known procedure.<sup>4</sup> To a solution of 2-(isopropylamino)-2-methylpropan-1-ol<sup>5</sup> (20 mmol), and triethylamine (26 mmol) in DCM (50 mL) at 0 °C was added *tert*-butyldimethylsilyl trifluoromethanesulfonate (26 mmol) dropwise. The reaction mixture was allowed to stir at room temperature for 24 hours. Upon completion, the reaction was quenched with H<sub>2</sub>O (20 mL), the organic phase was separated and the aqueous phase was extracted with DCM (3 × 50 mL). The combined organic phases were dried (MgSO<sub>4</sub>), filtered, and concentrated *in vacuo*. The crude reaction mixture was subjected to silica gel chromatography (hexanes/Et<sub>3</sub>N = 20:1) to afford **S6** (4.68 g, 19.08 mmol, 95%) as a colorless oil. <sup>1</sup>H NMR (400 MHz, CDCl<sub>3</sub>) δ 3.32 (s, 2H), 2.87 (m, 1H), 1.04 (d, *J* = 6.3 Hz, 6H), 1.01 (s, 6H), 0.89 (s, 9H), 0.04 (s, 6H).

**1-((*tert*-Butyldimethylsilyl)oxy)-*N*-isopropyl-*N*,2-dimethylpropan-2-amine (1s)**

1-((*tert*-Butyldimethylsilyl)oxy)-*N*-isopropyl-*N*,2-dimethylpropan-2-amine was prepared following a known procedure.<sup>6</sup> A 37% aq. solution of formaldehyde (1.6 g, 22 mmol) was added to a mixture of 1-((*tert*-butyldimethylsilyl)oxy)-*N*-isopropyl-2-methylpropan-2-amine **S6** (4.43 g, 18.1 mmol) and 88% formic acid (1.8 g, 39 mmol) at 0 °C. The reaction mixture was kept at 55 °C for 2 hours. Upon completion (monitored by TLC), the reaction was quenched with 8.0 M KOH (10 mL), extracted with Et<sub>2</sub>O (3 x 50 mL), dried (MgSO<sub>4</sub>), and concentrated *in vacuo*. The crude reaction mixture was subjected to silica gel chromatography (hexanes/Et<sub>3</sub>N = 50:1) to afford a colorless oil (3.2 g, 68% yield). <sup>1</sup>H NMR (600 MHz, CDCl<sub>3</sub>) δ 3.43 (s, 2H), 3.31 (hept, *J* = 6.6 Hz, 1H), 2.21 (s, 3H), 1.05 (s, 6H), 1.00 (d, *J* = 6.8 Hz, 6H), 0.89 (s, 9H), 0.03 (s, 6H).

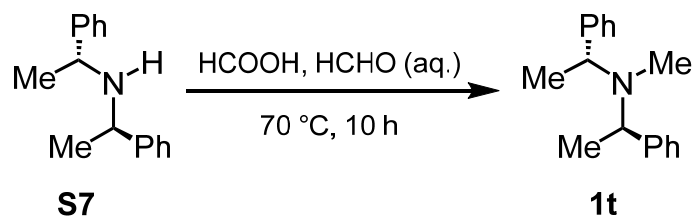

**(R)-N-Methyl-1-phenyl-N-((R)-1-phenylethyl)ethan-1-amine (1t)**

(R)-N-Methyl-1-phenyl-N-((R)-1-phenylethyl)ethan-1-amine was prepared following a known procedure.<sup>7</sup> A 37% aq. solution of formaldehyde (4.4 mmol) was added to a mixture of (R)-bis((R)-1-phenylethyl)amine **S7** (0.54 g, 2.2 mmol) and 88% formic acid (8.8 mmol) at 0 °C. The reaction mixture was kept at 70 °C for 10 hours. Upon completion (monitored by TLC), the reaction was basified with 1 M NaOH, extracted with EtOAc (3 x 40 mL), dried (MgSO<sub>4</sub>), and concentrated *in vacuo*. The crude reaction mixture was subjected to silica gel chromatography (hexanes/Et<sub>3</sub>N = 50:1) to afford a colorless oil (440 mg, 84% yield). <sup>1</sup>H NMR (500 MHz, CDCl<sub>3</sub>) δ 7.40 – 7.30 (m, 7H), 7.26 – 7.21 (m, 2H), 3.82 (q, *J* = 6.8 Hz, 2H), 2.00 (s, 3H), 1.33 (d, *J* = 6.8 Hz, 6H).<sup>8</sup>

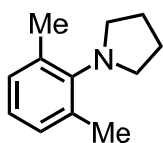

**1w**

**1-(2,6-dimethylphenyl)pyrrolidine (1w)**

1-(2,6-dimethylphenyl)pyrrolidine was prepared using the **General Procedure for Cyclic Amine Substrates** on 41 mmol scale. The product was obtained as a colorless oil (6.2 g, 86%). <sup>1</sup>H NMR (500 MHz, Chloroform-*d*) δ 7.06 – 7.00 (m, 2H), 6.97 (q, *J* = 7.9 Hz, 1H), 3.25 – 3.08 (m, 4H), 2.26 (d, *J* = 3.9 Hz, 6H), 2.05 – 1.92 (m, 4H).

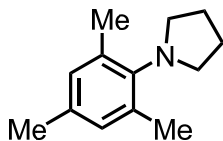

**1x**

**1-(2,6-dimethylphenyl)pyrrolidine (1x)**

1-(2,6-dimethylphenyl)pyrrolidine was prepared using the **General Procedure for Cyclic Amine Substrates** on 37 mmol scale. The product was obtained as a colorless oil (6.5 g, 93%).  $^1\text{H NMR}$  (500 MHz,  $\text{CDCl}_3$ )  $\delta$  6.86 (d,  $J = 1.5$  Hz, 2H), 3.25 – 3.11 (m, 4H), 2.26 (d,  $J = 1.5$  Hz, 3H), 2.23 (d,  $J = 1.5$  Hz, 6H), 1.97 (td,  $J = 6.3, 5.5, 2.9$  Hz, 4H).

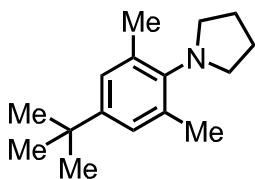

**1y**

**1-(4-(*tert*-Butyl)-2,6-dimethylphenyl)pyrrolidine (1y)**

1-(4-(*tert*-Butyl)-2,6-dimethylphenyl)pyrrolidine was prepared using the **General Procedure for Cyclic Amine Substrates** on 5.6 mmol scale. The product was obtained as a colorless oil (1.2 g, 92%).  $^1\text{H NMR}$  (500 MHz,  $\text{CDCl}_3$ )  $\delta$  7.03 (d,  $J = 0.9$  Hz, 2H), 3.22 – 3.10 (m, 4H), 2.25 (d,  $J = 0.6$  Hz, 6H), 2.02 – 1.90 (m, 4H), 1.29 (s, 9H).



**Table SI-2.  $\alpha,\beta$ -Unsaturated Substrates**

|                                                                                   |                                                                                   |                                                                                   |                                                                                   |                                                                                     |                                                                                     |
|-----------------------------------------------------------------------------------|-----------------------------------------------------------------------------------|-----------------------------------------------------------------------------------|-----------------------------------------------------------------------------------|-------------------------------------------------------------------------------------|-------------------------------------------------------------------------------------|
| 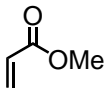 |  |  |  |  |  |
| <b>2a</b>                                                                         | <b>2c</b>                                                                         | <b>2d</b>                                                                         | <b>2e</b>                                                                         | <b>2f</b>                                                                           | <b>2g</b>                                                                           |
|  |  |  |  |  |  |
| <b>2h</b>                                                                         | <b>2i</b>                                                                         | <b>2j</b>                                                                         | <b>2k</b>                                                                         | <b>2q</b>                                                                           | <b>2r</b>                                                                           |
|  |  |  |  |                                                                                     |                                                                                     |
| <b>2s</b>                                                                         | <b>2t</b>                                                                         | <b>2u-(S)</b>                                                                     | <b>2u-(R)</b>                                                                     |                                                                                     |                                                                                     |

$\alpha,\beta$ -Unsaturated molecules **2a**, **2c**, **2f**, **2g**, **2h**, **2i**, **2j**, and **2k** were obtained from commercial sources. Substrates **2d**,<sup>14</sup> **2e**,<sup>15</sup> **2q**,<sup>16</sup> **2r**,<sup>17</sup> **2s**,<sup>17</sup> **2t**,<sup>16</sup> **2u-(S)**,<sup>16</sup> and **2u-(R)**<sup>16</sup> were prepared accordingly to the procedures previously reported in the literatures. Substrates **2q**, **2r**, **2s**, **2t**, **2u-(S)**, and **2u-(R)** were prepared fresh and stored in the freezer for up to 1 month.

## 2.2 Optimization Studies

### Experimental Procedure for the Optimization of the Amine Protecting Group (Table SI-3)

An oven-dried sealed tube equipped with a magnetic stir bar was used. Amine **1** (0.20 mmol), methyl acrylate **2a** (0.24 mmol),  $B(C_6F_5)_3$  (0.01 mmol), and benzene (0.2 mL) were added to the reaction vessel under nitrogen atmosphere. The reaction mixture was stirred at 22 °C for 12 h. Upon completion, the reaction mixture was concentrated *in vacuo*. The product yield was determined by the  $^1H$  NMR analysis of the unpurified product mixture using mesitylene as the internal standard.

**Table SI-3.** Evaluation of Amine Protecting Group

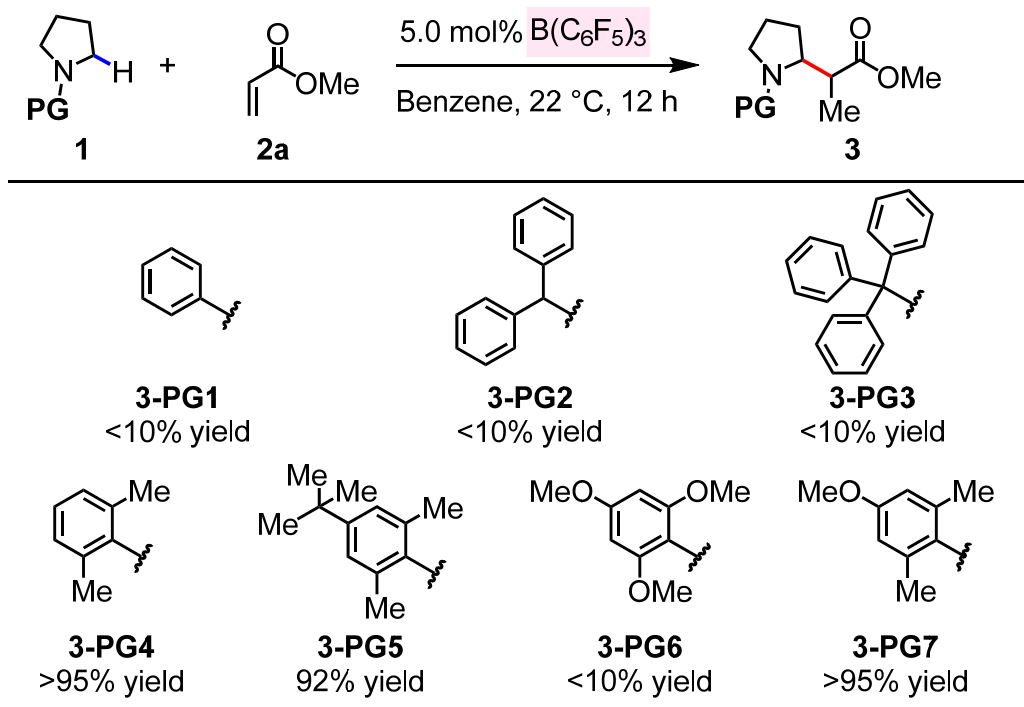

<sup>a</sup> Conditions: **1** (0.2 mmol), **2a** (0.24 mmol),  $B(C_6F_5)_3$  (5.0 mol%), benzene (0.2 mL), under  $N_2$ , 22 °C, 12 h. <sup>b</sup> The yield was determined by  $^1H$  NMR analysis of the unpurified product mixture using mesitylene as the internal standard.

### Experimental Procedure for the Optimization of the 1,2,2,6,6-Pentamethylpiperidine Substrate (Table SI-4)

An oven-dried sealed tube equipped with a magnetic stir bar was used. Amine **1q** (0.20 mmol), benzyl acrylate **2c** (0.24 mmol), B(C<sub>6</sub>F<sub>5</sub>)<sub>3</sub>, and solvent (0.4 mL) were added to the reaction vessel under nitrogen atmosphere. Then, the reaction mixture was stirred for 12 h. Upon completion, the reaction mixture was concentrated *in vacuo*. The product yield was determined by the <sup>1</sup>H NMR analysis of the unpurified product mixture using mesitylene as the internal standard.

**Table SI-4.** Evaluation of Substrate **1q**

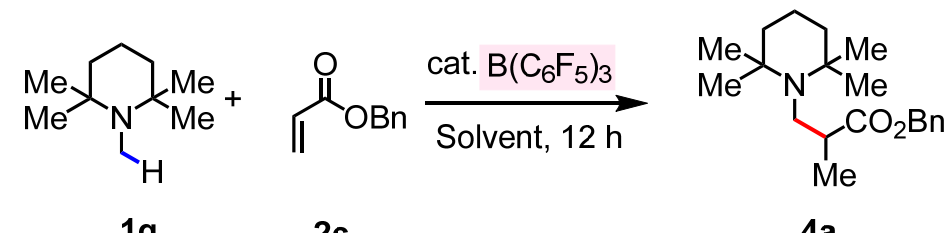

| entry | Temp (°C) | B(C <sub>6</sub> F <sub>5</sub> ) <sub>3</sub> (mol%) | Solvent | <b>4a</b> (%) |
|-------|-----------|-------------------------------------------------------|---------|---------------|
| 1     | 22        | 5                                                     | DCM     | < 5           |
| 2     | 22        | 5                                                     | Benzene | < 5           |
| 3     | 22        | 10                                                    | Benzene | 85            |
| 4     | 70        | 10                                                    | Benzene | 99            |

<sup>a</sup> Conditions: **1q** (0.2 mmol), **2c** (0.24 mmol), B(C<sub>6</sub>F<sub>5</sub>)<sub>3</sub> (cat.), solvent (0.4 mL), under N<sub>2</sub>, 12 h. <sup>b</sup> The yield was determined by <sup>1</sup>H NMR analysis of the unpurified product mixture using mesitylene as the internal standard.

### Experimental Procedure for the Optimization of the Lewis Acid Co-Catalyst (Table SI-5)

An oven-dried sealed tube equipped with a magnetic stir bar was used. 1-(4-Methoxy-2,6-dimethylphenyl)pyrrolidine **1a** (0.10 mmol), 3-acryloyloxazolidin-2-one **2q** (0.12 mmol), B(C<sub>6</sub>F<sub>5</sub>)<sub>3</sub> (0.01 mmol), Lewis acid co-catalyst (0.01 mmol) and DCM (0.3 mL) were added to the reaction vessel under nitrogen atmosphere. The reaction mixture was stirred at 22 °C for 12 h. Upon completion, the reaction mixture was filtered through silica gel and concentrated

*in vacuo*. The product yield was determined by the  $^1\text{H}$  NMR analysis of the unpurified product mixture using mesitylene as the internal standard.

**Table SI-5.** Evaluation of Co-Catalyst

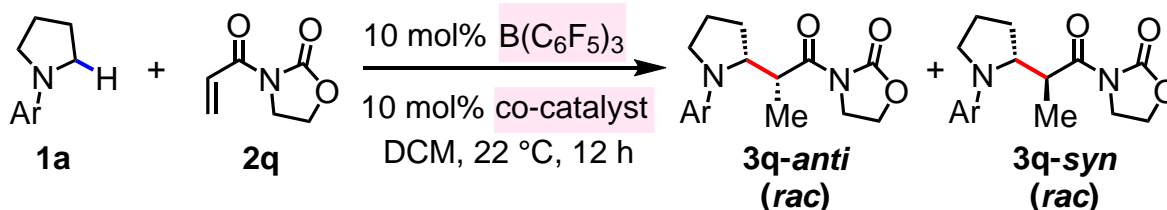

| entry | co-catalyst          | yield (%) | <i>anti:syn</i> |
|-------|----------------------|-----------|-----------------|
| 1     | None                 | 35        | 3.2:1           |
| 2     | CuOTf·Toluene        | 86        | 2.6:1           |
| 3     | Ni(OTf) <sub>2</sub> | 31        | 4.2:1           |
| 4     | Mg(OTf) <sub>2</sub> | 38        | 3.8:1           |

<sup>a</sup> Conditions: **1a** (0.1 mmol), **2q** (0.12 mmol),  $\text{B}(\text{C}_6\text{F}_5)_3$  (10 mol%), cocatalyst (10 mol%), DCM (0.3 mL), under  $\text{N}_2$ , 22 °C, 12 h. <sup>b</sup> The yield was determined by  $^1\text{H}$  NMR analysis of the unpurified product mixture using mesitylene as the internal standard.

### Experimental Procedure for the Optimization of the Metal with L3 (Table SI-6)

An oven-dried sealed tube equipped with a magnetic stir bar was used. To this tube were added Lewis acid co-catalyst (0.01 mmol), 2,6-bis((*R*)-4-phenyl-4,5-dihydrooxazol-2-yl)pyridine **L3** (0.012 mmol), and DCM (0.2 mL) under nitrogen atmosphere. The mixture was stirred for 20 min at 22 °C. Subsequently, 3-acryloyloxazolidin-2-one **2q** (0.12 mmol), 1-(4-methoxy-2,6-dimethylphenyl)pyrrolidine **1a** (0.10 mmol),  $\text{B}(\text{C}_6\text{F}_5)_3$  (0.01 mmol) and DCM (0.1 mL) were added to the reaction vessel, and the resulting mixture was stirred at 22 °C for 12 h. Upon completion, the reaction mixture was filtered through a plug of silica gel and concentrated *in vacuo*. The product yield and *anti:syn* ratio were determined by the  $^1\text{H}$  NMR analysis of the unpurified product mixture using mesitylene as the internal standard.

The Mannich product was purified and isolated by preparative TLC (4:1 hexanes/EtOAc). The er value of each diastereomer was determined by HPLC analysis of the isolated product.

**Table SI-6.** Evaluation of Metal with **L3**

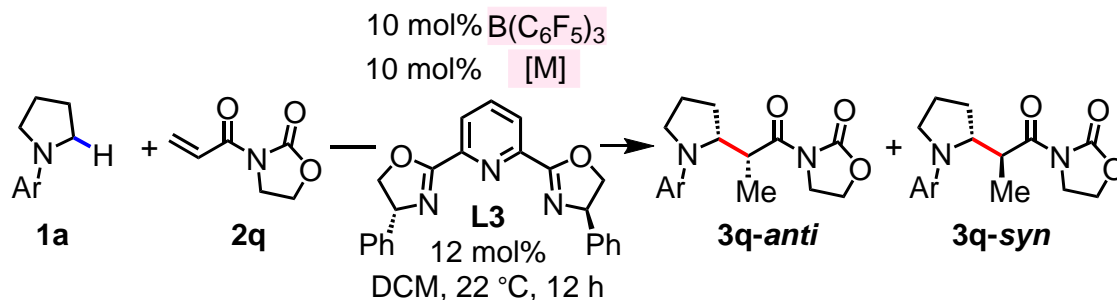

| entry | [M]                                                  | yield (%) | <i>anti:syn</i> | enantiomeric ratio |               |
|-------|------------------------------------------------------|-----------|-----------------|--------------------|---------------|
|       |                                                      |           |                 | <b>3q-anti</b>     | <b>3q-syn</b> |
| 1     | None(without <b>L3</b> )                             | 35        | 4.8:1           | NA                 | NA            |
| 2     | None(with <b>L3</b> )                                | <5        | NA              | NA                 | NA            |
| 3     | CuOTf·Toluene                                        | 71        | 3.2:1           | 50:50              | 50:50         |
| 4     | Zn(OTf) <sub>2</sub>                                 | 15        | 1:1             | 50:50              | 50:50         |
| 5     | Mg(ClO <sub>4</sub> ) <sub>2</sub>                   | 40        | 3.4:1           | 50:50              | 50:50         |
| 6     | Sc(OTf) <sub>3</sub>                                 | <5        | NA              | NA                 | NA            |
| 7     | Ni(BF <sub>4</sub> ) <sub>2</sub> ·H <sub>2</sub> O  | <5        | NA              | NA                 | NA            |
| 8     | Fe(ClO <sub>4</sub> ) <sub>3</sub> ·H <sub>2</sub> O | <5        | NA              | NA                 | NA            |
| 9     | Mg(OTf) <sub>2</sub>                                 | 66        | 2.3:1           | 72:28              | 75:25         |

<sup>a</sup> Conditions: **1a** (0.1 mmol), **2q** (0.12 mmol),  $B(C_6F_5)_3$  (10 mol%), **[M]** (10 mol%), **L3** (12 mol%), DCM (0.3 mL), under  $N_2$ , 22 °C, 12 h. <sup>b</sup> The yield and *anti:syn* ratio were determined by <sup>1</sup>H NMR analysis of the unpurified product mixture using mesitylene as the internal standard.

### Experimental Procedure for the Optimization of PyBOX Ligand (Table SI-7)

An oven-dried sealed tube equipped with a magnetic stir bar was used. To this tube were added  $\text{Mg}(\text{OTf})_2$  (0.01 mmol), ligand (0.012 mmol), DCM (0.2 mL) under nitrogen atmosphere. The mixture was stirred for 20 min at 22 °C. Subsequently, 3-acryloyl-4,4-dimethyloxazolidin-2-one **2r** (0.12 mmol), 1-(4-methoxy-2,6-dimethylphenyl)pyrrolidine **1a** (0.10 mmol),  $\text{B}(\text{C}_6\text{F}_5)_3$  (0.01 mmol), and DCM (0.1 mL) were added to the reaction vessel, and the resulting mixture was stirred at 22 °C for 12 h. Upon completion, the reaction mixture was filtered through a pad of silica gel and concentrated *in vacuo*. The product yield and *anti:syn* ratio were determined by the  $^1\text{H}$  NMR analysis of the unpurified product mixture using mesitylene as the internal standard. The Mannich product was purified and isolated by preparative TLC (4:1 hexanes/EtOAc). The er values of each diastereomer was determined by HPLC analysis of the isolated product.

**Table SI-7.** Evaluation of Chiral Ligands

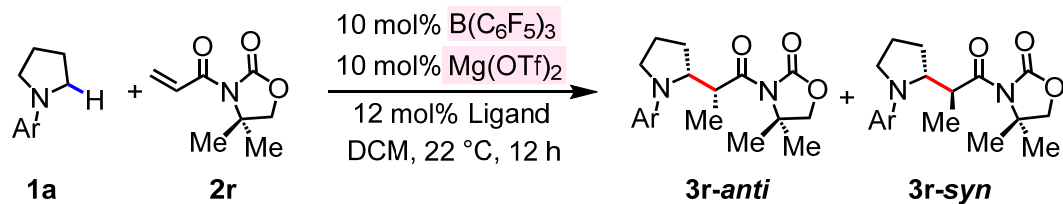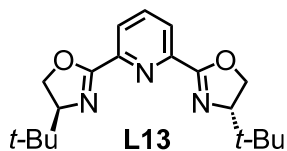

**3r**, <5% yield

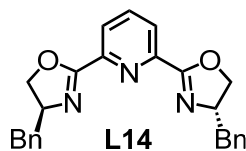

**3r**, 39% yield  
**anti:syn** 4.5:1  
**anti**, 34:66 er  
**syn**, 28:72 er

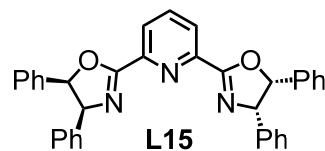

**3r**, <5% yield

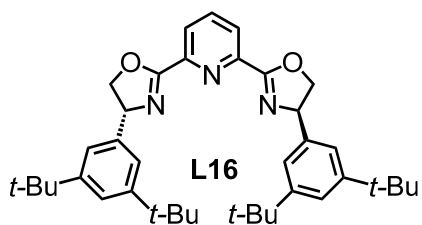

**3r**, <5% yield

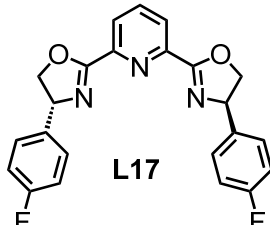

**3r**, 26% yield  
**anti:syn** 3.3:1  
**anti**, 93:7 er  
**syn**, 94:6 er

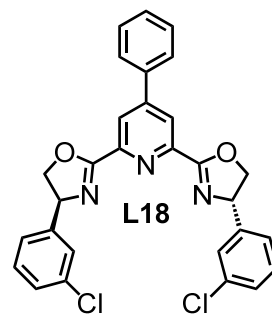

**3r**, <5% yield

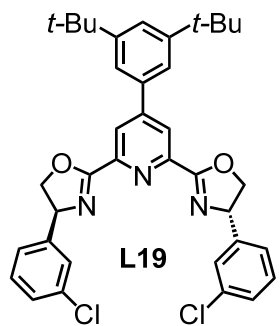

**3r**, <5% yield

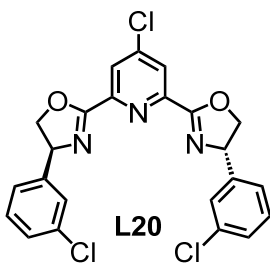

**3r**, 69% yield  
**anti:syn** 4.3:1  
**anti**, 4:96 er  
**syn**, 3:97 er

<sup>a</sup> Conditions: **1a** (0.1 mmol), **2r** (0.12 mmol),  $B(C_6F_5)_3$  (10 mol%),  $Mg(OTf)_2$  (10 mol%), Ligand (12 mol%), DCM (0.3 mL), under  $N_2$ , 22  $^\circ\text{C}$ , 12 h. <sup>b</sup> The yield was determined by  $^1\text{H}$  NMR analysis of the unpurified product mixture using mesitylene as the internal standard.

## 2.3 General Procedures for the Stereoselective Coupling of *N*-Alkylamines and $\alpha,\beta$ -Unsaturated Molecules

### General Procedure for B(C<sub>6</sub>F<sub>5</sub>)<sub>3</sub>-Catalyzed Racemic Mannich Reactions

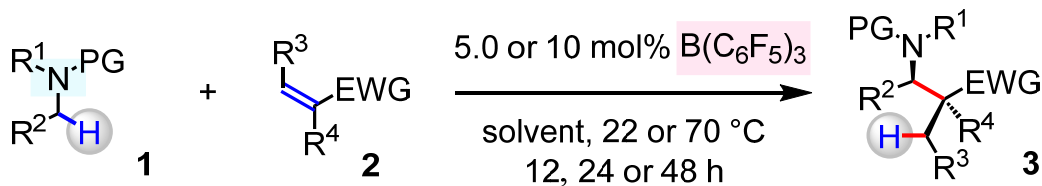

To a 15 mL oven-dried sealed tube was added amine **1** (0.2 mmol, 1 equiv.),  $\alpha,\beta$ -unsaturated compound **2** (0.24 mmol, 1.2 equiv.), a catalytic amount of B(C<sub>6</sub>F<sub>5</sub>)<sub>3</sub> and solvent under nitrogen atmosphere. The reaction mixture was stirred at either 22 °C or 70 °C for 12 to 48 hours (see **SI-Section 3.2** for details). Upon completion, the reaction mixture was diluted with EtOAc, concentrated *in vacuo* and purified by silica gel column chromatography.

### General Procedure for Stereoselective Mannich Reactions

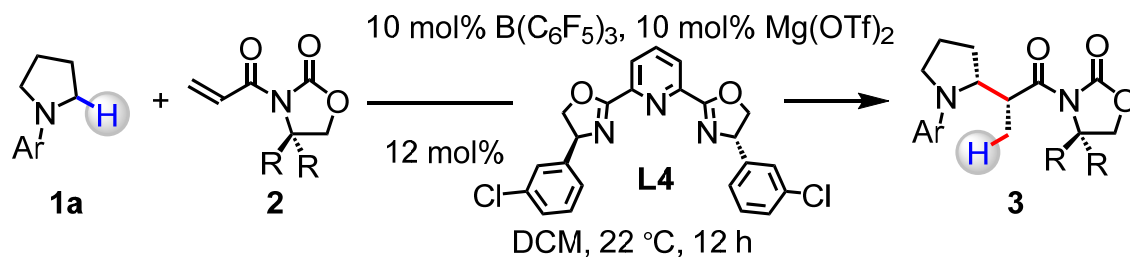

An oven-dried sealed tube equipped with a magnetic stir bar was used. To this tube were added Mg(OTf)<sub>2</sub> (0.02 mmol), ligand **L4** (0.024 mmol), DCM (0.2 mL) under nitrogen atmosphere. The mixture was stirred for 20 min at 22 °C, then oxazolidinone substrate **2** (0.30 mmol), 1-(4-methoxy-2,6-dimethylphenyl)pyrrolidine **1a** (0.20 mmol), B(C<sub>6</sub>F<sub>5</sub>)<sub>3</sub> (0.02 mmol), and DCM (0.1 mL) were added to the vessel. The reaction mixture was stirred at 22 °C for 12 h. Upon completion, the crude mixture was filtered through a pad of silica gel and concentrated *in vacuo*. The Mannich product was purified and isolated by silica gel column chromatography. The *anti:syn* ratio was determined by <sup>1</sup>H NMR analysis of the crude reaction mixture. The *er* values of each diastereomer was determined by HPLC analysis of the isolated product.



### 3. Analytical Data

#### 3.1 Characterization of Chiral Ligands

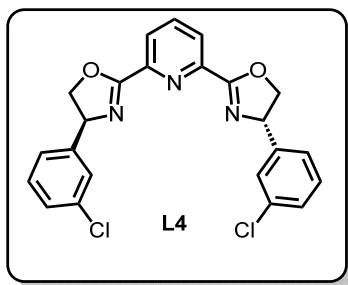

#### 2,6-Bis((*S*)-4-(3-chlorophenyl)-4,5-dihydrooxazol-2-yl)pyridine (**L4**)

$^1\text{H NMR}$  (600 MHz,  $\text{CDCl}_3$ )  $\delta$  8.34 (d,  $J = 7.9$  Hz, 2H), 7.95 (t,  $J = 7.8$  Hz, 1H), 7.33 (s, 2H), 7.31 – 7.26 (m, 4H), 7.20 (dt,  $J = 7.0, 1.8$  Hz, 2H), 5.45 (dd,  $J = 10.3, 8.5$  Hz, 2H), 4.93 (dd,  $J = 10.4, 8.7$  Hz, 2H), 4.39 (t,  $J = 8.6$  Hz, 2H);  $^{13}\text{C NMR}$  (151 MHz,  $\text{CDCl}_3$ )  $\delta$  166.46, 149.22, 146.34, 140.24, 137.38, 132.75, 130.64, 129.64, 129.13, 127.62, 77.92, 72.43; **IR** (neat) 3061, 2967, 2899, 1637, 1571, 1429, 1379, 1250, 1106, 1075, 969, 784, 735, 691  $\text{cm}^{-1}$ ; **HRMS** (DART)  $m/z$  Calcd for  $\text{C}_{23}\text{H}_{18}\text{N}_3\text{O}_2\text{Cl}_2$  ( $\text{MH}^+$ ): 438.0776; found: 438.0784.

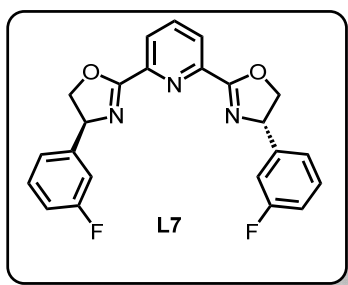

#### 2,6-Bis((*S*)-4-(3-fluorophenyl)-4,5-dihydrooxazol-2-yl)pyridine (**L7**)

$^1\text{H NMR}$  (600 MHz,  $\text{CDCl}_3$ )  $\delta$  8.33 (d,  $J = 7.8$  Hz, 2H), 7.93 (t,  $J = 7.9$  Hz, 1H), 7.31 (td,  $J = 7.9, 5.8$  Hz, 2H), 7.09 (dt,  $J = 7.6, 1.2$  Hz, 2H), 7.03 (dt,  $J = 9.7, 2.1$  Hz, 2H), 6.98 (td,  $J = 8.4, 2.4$  Hz, 2H), 5.45 (dd,  $J = 10.3, 8.6$  Hz, 2H), 4.92 (dd,  $J = 10.4, 8.6$  Hz, 2H), 4.38 (t,  $J = 8.6$  Hz, 2H);  $^{13}\text{C NMR}$  (151 MHz,  $\text{CDCl}_3$ )  $\delta$  163.67, 162.97 (d,  $J = 248$  Hz), 146.50, 144.15 (d,  $J = 6.9$  Hz), 137.47, 130.27 (d,  $J = 8.1$  Hz), 126.34, 122.29 (d,  $J = 2.8$  Hz), 114.60 (d,  $J = 21.0$  Hz), 113.67 (d,  $J = 22.0$  Hz), 75.17, 69.68 (d,  $J = 1.8$  Hz); **IR** (neat) 3066, 2969, 2901, 1637, 1588, 1448, 1379, 1246, 1140, 1106, 1075, 972, 879, 785, 742, 694  $\text{cm}^{-1}$ ; **HRMS** (DART)  $m/z$  Calcd for  $\text{C}_{23}\text{H}_{18}\text{N}_3\text{O}_2\text{F}_2$  ( $\text{MH}^+$ ): 406.1367; found: 406.1383.

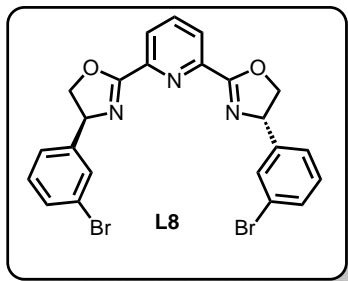

**2,6-Bis((S)-4-(3-bromophenyl)-4,5-dihydrooxazol-2-yl)pyridine (L8)**

$^1\text{H NMR}$  (600 MHz,  $\text{CDCl}_3$ )  $\delta$  8.34 (d,  $J = 7.9$  Hz, 2H), 7.95 (t,  $J = 7.9$  Hz, 1H), 7.48 (s, 2H), 7.43 (dt,  $J = 7.3, 1.9$  Hz, 2H), 7.26 – 7.21 (m, 4H), 5.44 (t,  $J = 10.4$ , 2H), 4.92 (t,  $J = 10.4$ , 2H), 4.38 (t,  $J = 8.6$  Hz, 2H);  $^{13}\text{C NMR}$  (151 MHz,  $\text{CDCl}_3$ )  $\delta$  163.70, 146.46, 143.85, 137.49, 130.82, 130.28, 129.79, 126.40, 125.35, 122.83, 75.16, 69.64; **IR** (neat) 3359, 2967, 2898, 1636, 1568, 1473, 1378, 1252, 1106, 1072, 968, 782, 736, 691  $\text{cm}^{-1}$ ; **HRMS** (DART)  $m/z$  Calcd for  $\text{C}_{23}\text{H}_{18}\text{N}_3\text{O}_2\text{Br}_2$  ( $\text{MH}^+$ ): 525.9766; found: 525.9753.

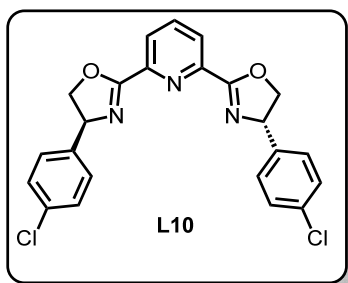

**2,6-Bis((S)-4-(4-chlorophenyl)-4,5-dihydrooxazol-2-yl)pyridine (L10)**

$^1\text{H NMR}$  (600 MHz,  $\text{CDCl}_3$ )  $\delta$  8.33 (d,  $J = 7.8$  Hz, 2H), 7.93 (t,  $J = 7.8$  Hz, 1H), 7.35 – 7.32 (m, 4H), 7.28 – 7.24 (m, 4H), 5.44 (dd,  $J = 10.3, 8.6$  Hz, 2H), 4.92 (dd,  $J = 10.3, 8.7$  Hz, 2H), 4.37 (t,  $J = 8.6$  Hz, 2H);  $^{13}\text{C NMR}$  (151 MHz,  $\text{CDCl}_3$ )  $\delta$  163.61, 146.58, 140.14, 137.50, 133.57, 128.91, 128.12, 126.35, 75.30, 69.63; **IR** (neat) 2985, 2963, 2928, 2897, 1636, 1488, 1377, 1256, 1104, 1071, 1014, 918, 840  $\text{cm}^{-1}$ ; **HRMS** (DART)  $m/z$  Calcd for  $\text{C}_{23}\text{H}_{18}\text{N}_3\text{O}_2\text{Cl}_2$  ( $\text{MH}^+$ ): 438.0776; found: 438.0788.

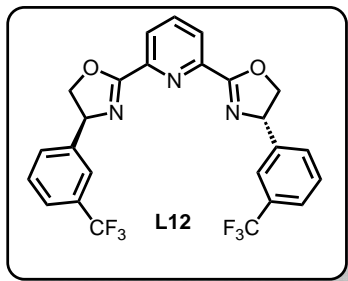

**2,6-Bis((S)-4-(3-(trifluoromethyl)phenyl)-4,5-dihydrooxazol-2-yl)pyridine (L12)**

**<sup>1</sup>H NMR** (600 MHz, CDCl<sub>3</sub>) δ 8.36 (d, *J* = 7.9 Hz, 2H), 7.97 (t, *J* = 7.8 Hz, 1H), 7.60 (s, 2H), 7.58 (d, *J* = 7.6 Hz, 2H), 7.51 (dt, *J* = 15.2, 7.7 Hz, 4H), 5.55 (dd, *J* = 10.4, 8.7 Hz, 2H), 4.98 (dd, *J* = 10.4, 8.7 Hz, 2H), 4.41 (t, *J* = 8.7 Hz, 2H); **<sup>13</sup>C NMR** (151 MHz, CDCl<sub>3</sub>) δ 163.89, 146.47, 142.58, 137.62, 131.11 (q, *J* = 32.4 Hz), 130.16, 129.29, 126.49, 124.64 (q, *J* = 3.7 Hz), 123.82 (q, *J* = 243 Hz), 123.61 (q, *J* = 3.9 Hz), 75.18, 69.84; **IR** (neat) 3068, 2970, 2903, 1639, 1326, 1162, 1120, 1073, 804, 702 cm<sup>-1</sup>; **HRMS** (DART) *m/z* Calcd for C<sub>25</sub>H<sub>18</sub>N<sub>3</sub>O<sub>2</sub>F<sub>6</sub> (MH<sup>+</sup>): 506.1303; found: 506.1317.

### 3.2 Characterization of the Mannich Products

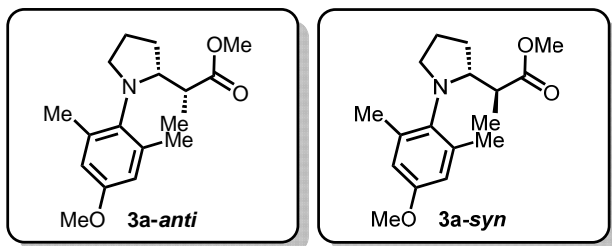

#### Methyl 2-(1-(4-methoxy-2,6-dimethylphenyl)pyrrolidin-2-yl)propanoate (**3a**)

1-(4-Methoxy-2,6-dimethylphenyl)pyrrolidine **1a** (0.2 mmol, 1 equiv.) was reacted with methyl acrylate **2a** (0.24 mmol, 1.2 equiv.) following the **General Procedure for B(C<sub>6</sub>F<sub>5</sub>)<sub>3</sub>-Catalyzed Racemic Mannich Reactions** using B(C<sub>6</sub>F<sub>5</sub>)<sub>3</sub> (5.0 mol%) as the Lewis acid catalyst, benzene (0.2 mL) as the solvent and was carried out for 12 h at 22 °C. <sup>1</sup>H NMR analysis of the crude material revealed that **3a-anti** and **3a-syn** were obtained in the ratio of 2.3:1. After purification by column chromatography (hexanes: EtOAc = 20:1), **3a** was obtained as a mixture of diastereomers (56 mg, 97%). Further purification was carried out by PTLC using hexanes: DCM = 5:1 as the eluent to separate **3a-anti** and **3a-syn**.

**3a-anti:** <sup>1</sup>H NMR (600 MHz, CDCl<sub>3</sub>) δ 6.56 (d, *J* = 3.0 Hz, 1H), 6.53 (d, *J* = 3.0 Hz, 1H), 3.88 (q, *J* = 6.4 Hz, 1H), 3.74 (s, 3H), 3.31 – 3.28 (m, 4H), 2.98 (q, *J* = 7.7 Hz, 1H), 2.36 (p, *J* = 6.8 Hz, 1H), 2.27 (s, 3H), 2.24 (s, 3H), 2.07 (dq, *J* = 12.4, 7.5 Hz, 1H), 1.96 – 1.87 (m, 2H), 1.77 (dq, *J* = 12.8, 6.1 Hz, 1H), 1.11 (d, *J* = 7.0 Hz, 3H); <sup>13</sup>C NMR (151 MHz, CDCl<sub>3</sub>) δ 176.15, 156.58, 140.66, 138.50, 137.45, 114.41, 112.93, 62.75, 55.18, 52.70, 51.09, 45.22, 29.06, 24.99, 19.49, 19.23, 13.47; IR (neat) 2947, 1733, 1061, 1484, 1464, 1434, 1319, 1260, 1194, 1154, 1066 cm<sup>-1</sup>; HRMS (DART) *m/z* Calcd for C<sub>17</sub>H<sub>26</sub>NO<sub>3</sub> (MH<sup>+</sup>): 292.1913; found: 292.1921.

**3a-syn:** <sup>1</sup>H NMR (600 MHz, CDCl<sub>3</sub>) δ 6.57 (d, *J* = 3.1 Hz, 1H), 6.54 (d, *J* = 2.8 Hz, 1H), 3.88 – 3.81 (m, 1H), 3.74 (s, 3H), 3.44 (s, 3H), 3.27 (td, *J* = 8.1, 7.5, 2.8 Hz, 1H), 2.92 (td, *J* = 8.5, 6.6 Hz, 1H), 2.45 (ddd, *J* = 7.0, 5.6, 1.4 Hz, 1H), 2.29 (s, 3H), 2.23 (s, 3H), 2.15 – 2.08 (m, 1H), 1.97 – 1.84 (m, 3H), 1.01 (dd, *J* = 7.0, 1.4 Hz, 3H); <sup>13</sup>C NMR (151 MHz, CDCl<sub>3</sub>) δ 175.94, 156.40, 140.30, 138.86, 137.24, 114.49, 113.03, 63.59, 55.17, 53.38, 51.08, 45.89,

29.82, 25.11, 19.43, 19.09, 13.81; **IR** (neat) 2948, 1733, 1602, 1483, 1463, 1318, 1257, 1193, 1154, 1068 $\text{cm}^{-1}$ ; **HRMS** (DART)  $m/z$  Calcd for  $\text{C}_{17}\text{H}_{26}\text{NO}_3$  ( $\text{MH}^+$ ): 292.1913; found: 292.1919.

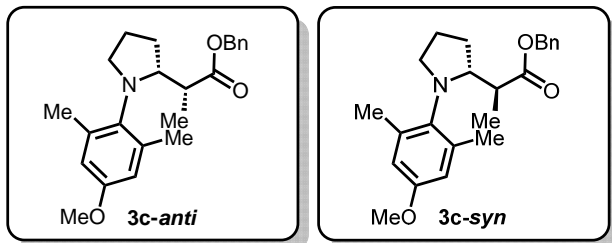

### Benzyl 2-(1-(4-methoxy-2,6-dimethylphenyl)pyrrolidin-2-yl)propanoate (**3c**)

1-(4-Methoxy-2,6-dimethylphenyl)pyrrolidine **1a** (0.1 mmol, 1.0 equiv.) was reacted with benzyl acrylate **2c** (0.24 mmol, 1.2 equiv.) following the **General Procedure for B(C<sub>6</sub>F<sub>5</sub>)<sub>3</sub>-Catalyzed Racemic Mannich Reactions** using B(C<sub>6</sub>F<sub>5</sub>)<sub>3</sub> (5.0 mol%) as the Lewis acid catalyst, benzene (0.2 mL) as the solvent and was carried out for 12 h at 22 °C. <sup>1</sup>H NMR analysis of the crude material revealed that **3c-anti** and **3c-syn** were obtained in the ratio of 2.5:1. After purification by column chromatography (hexanes: EtOAc = 30:1), **3c** was obtained as a mixture of diastereomers (67 mg, 91%). Further purification was carried out by PTLC using hexanes: DCM = 5:1 as the eluent to separate **3c-anti** and **3c-syn**.

**3c-anti:** <sup>1</sup>H NMR (600 MHz, CDCl<sub>3</sub>) δ 7.34 – 7.28 (m, 3H), 7.24 – 7.19 (m, 2H), 6.54 (d, *J* = 3.1 Hz, 1H), 6.51 (d, *J* = 3.1 Hz, 1H), 4.77 – 4.62 (m, 2H), 3.95 – 3.91 (m, 1H), 3.72 (s, 3H), 3.30 (ddd, *J* = 8.4, 7.0, 4.8 Hz, 1H), 2.98 (dt, *J* = 8.4, 7.4 Hz, 1H), 2.42 (p, *J* = 6.8 Hz, 1H), 2.26 (s, 3H), 2.21 (s, 3H), 2.09 – 2.02 (m, 1H) 1.96 – 1.85 (m, 2H), 1.80 – 1.74 (m, 1H), 1.14 (d, *J* = 7.0 Hz, 3H); <sup>13</sup>C NMR (151 MHz, CDCl<sub>3</sub>) δ 178.15, 159.21, 143.29, 141.19, 140.08, 138.85, 130.99, 130.52, 130.49, 117.13, 115.61, 68.38, 65.35, 57.80, 55.34, 47.94, 31.64, 27.66, 22.12, 21.95, 16.08; IR (neat) 2944, 2878, 2837, 1731, 1602, 1483, 1464, 1318, 1263, 1192, 1154, 1068, 697 cm<sup>-1</sup>; HRMS (DART) *m/z* Calcd for C<sub>23</sub>H<sub>30</sub>NO<sub>3</sub> (MH<sup>+</sup>): 368.2226; found: 368.2237.

**3c-syn:** <sup>1</sup>H NMR (600 MHz, CDCl<sub>3</sub>) δ 7.37 – 7.27 (m, 5H), 6.56 (d, *J* = 3.1 Hz, 1H), 6.51 (d, *J* = 3.1 Hz, 1H), 4.95 (d, *J* = 12.3 Hz, 1H), 4.71 (d, *J* = 12.3 Hz, 1H), 3.88 (ddd, *J* = 8.2, 5.5, 2.8 Hz, 1H), 3.73 (s, 3H), 3.33 – 3.20 (m, 1H), 2.91 (td, *J* = 8.6, 6.6 Hz, 1H), 2.50 (qd, *J* = 7.0, 5.5 Hz, 1H), 2.27 (s, 3H), 2.20 (s, 3H), 2.16 – 2.07 (m, 1H), 1.94 – 1.84 (m, 3H), 1.04 (d, *J* = 7.0 Hz, 3H); <sup>13</sup>C NMR (151 MHz, CDCl<sub>3</sub>) δ 175.27, 156.40, 140.38, 138.96, 137.23,

136.12, 128.39, 128.18, 128.01, 114.53, 113.06, 65.89, 63.65, 55.15, 53.45, 46.14, 29.93, 25.18, 19.39, 19.20, 13.72; **IR** (neat) 2940, 1731, 1602, 1483, 1463, 1256, 1192, 1154, 1068, 698  $\text{cm}^{-1}$ ; **HRMS** (DART)  $m/z$  Calcd for  $\text{C}_{23}\text{H}_{30}\text{NO}_3$  ( $\text{MH}^+$ ): 368.2226; found: 368.2239.

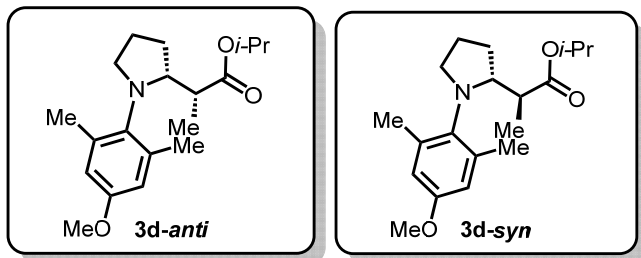

### Isopropyl 2-(1-(4-methoxy-2,6-dimethylphenyl)pyrrolidin-2-yl)propanoate (**3d**)

1-(4-Methoxy-2,6-dimethylphenyl)pyrrolidine **1a** (0.2 mmol, 1.0 equiv.) was reacted with isopropyl acrylate **2d** (0.24 mmol, 1.2 equiv.) following the **General Procedure for B(C<sub>6</sub>F<sub>5</sub>)<sub>3</sub>-Catalyzed Racemic Mannich Reactions** using B(C<sub>6</sub>F<sub>5</sub>)<sub>3</sub> (5.0 mol%) as the Lewis acid catalyst, benzene (0.2 mL) as the solvent and was carried out for 12 h at 22 °C. <sup>1</sup>H NMR analysis of the crude material revealed that **3d-anti** and **3d-syn** were obtained in the ratio of 2.1:1. After purification by column chromatography (hexanes: Et<sub>2</sub>O = 32:1), **3d** was obtained as a mixture of diastereomers (50 mg, 78%). Further purification was carried out by PTLC using hexanes: Et<sub>2</sub>O = 9:1 as the eluent to separate **3d-anti** and **3d-syn**.

**3d-anti:** <sup>1</sup>H NMR (500 MHz, CDCl<sub>3</sub>) δ 6.57 – 6.55 (m, 1H), 6.54 (d, *J* = 2.8 Hz, 1H), 4.65 (hept, *J* = 6.2 Hz, 1H), 3.91 (dt, *J* = 7.7, 5.4 Hz, 1H), 3.74 (s, 3H), 3.29 (ddd, *J* = 8.4, 6.8, 4.6 Hz, 1H), 2.98 (q, *J* = 7.6 Hz, 1H), 2.35 – 2.29 (m, 1H), 2.27 (s, 3H), 2.25 (s, 3H), 2.07 – 1.99 (m, 1H), 1.96 – 1.88 (m, 2H), 1.83 – 1.77 (m, 1H), 1.11 (dd, *J* = 7.1, 0.6 Hz, 3H), 1.08 (d, *J* = 6.3 Hz, 3H), 1.05 (d, *J* = 6.2 Hz, 3H); <sup>13</sup>C NMR (126 MHz, CDCl<sub>3</sub>) δ 175.17, 156.59, 140.52, 138.46, 137.62, 114.53, 112.98, 67.07, 62.41, 55.14, 52.63, 44.84, 28.37, 25.14, 21.61, 21.53, 19.47, 19.29, 12.81; IR (neat) 2973, 1731, 1602, 1481, 1464, 1371, 1317, 1260, 1153, 1105, 1067, 854, 698 cm<sup>-1</sup>; HRMS (DART) *m/z* Calcd for C<sub>19</sub>H<sub>30</sub>NO<sub>3</sub> (MH<sup>+</sup>): 320.2226; found: 320.2221.

**3d-syn:** <sup>1</sup>H NMR (600 MHz, CDCl<sub>3</sub>) δ 6.57 (d, *J* = 3.0 Hz, 1H), 6.53 (d, *J* = 3.0 Hz, 1H), 4.82 (hept, *J* = 6.3 Hz, 1H), 3.78 (ddd, *J* = 8.6, 6.0, 2.9 Hz, 1H), 3.74 (s, 3H), 3.27 (td, *J* = 7.9, 2.6 Hz, 1H), 2.92 (td, *J* = 8.6, 6.5 Hz, 1H), 2.43 – 2.36 (m, 1H), 2.32 (s, 3H), 2.23 (s, 3H), 2.17 – 2.09 (m, 1H), 1.98 – 1.91 (m, 1H), 1.91 – 1.85 (m, 2H), 1.16 (d, *J* = 6.3 Hz, 3H), 1.08 (d, *J* = 6.3 Hz, 3H), 0.97 (d, *J* = 6.9 Hz, 3H); <sup>13</sup>C NMR (151 MHz, CDCl<sub>3</sub>) δ 175.07, 156.40,



140.34, 139.26, 137.18, 114.47, 113.03, 67.05, 63.81, 55.12, 53.47, 46.73, 30.06, 25.23, 21.75, 21.51, 19.32, 19.25, 14.19; **IR** (neat) 2974, 1723, 1603, 1464, 1317, 1255, 1153, 1107, 1068, 854  $\text{cm}^{-1}$ ; **HRMS** (DART)  $m/z$  Calcd for  $\text{C}_{19}\text{H}_{30}\text{NO}_3$  ( $\text{MH}^+$ ): 320.2226; found: 320.2216.

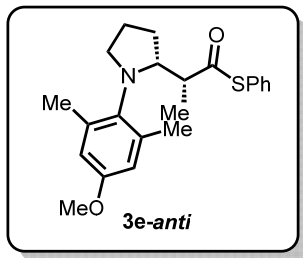

***S*-Phenyl 2-(1-(4-methoxy-2,6-dimethylphenyl)pyrrolidin-2-yl)propanethioate (**3e**)**

1-(4-Methoxy-2,6-dimethylphenyl)pyrrolidine **1a** (0.2 mmol, 1.0 equiv.) was reacted with *S*-phenyl prop-2-enethioate **2e** (0.24 mmol, 1.2 equiv.) following the **General Procedure for B(C<sub>6</sub>F<sub>5</sub>)<sub>3</sub>-Catalyzed Racemic Mannich Reactions** using B(C<sub>6</sub>F<sub>5</sub>)<sub>3</sub> (5.0 mol%) as the Lewis acid catalyst, benzene (0.2 mL) as the solvent and was carried out for 12 h at 22 °C. <sup>1</sup>H NMR analysis of the crude material revealed that **3e-anti** and **3e-syn** were obtained in the ratio of 1.8:1. After purification by column chromatography (hexanes: Et<sub>2</sub>O = 30:1), **3e** was obtained as a mixture of diastereomers (39 mg, 53%). <sup>1</sup>H NMR (500 MHz, CDCl<sub>3</sub>) δ 7.36 – 7.29 (m, 3H), 7.16 – 7.11 (m, 2H), 6.59 (s, 1H), 6.55 (s, 1H), 4.06 (dt, *J* = 7.3, 5.7 Hz, 1H), 3.76 (s, 3H), 3.33 (ddd, *J* = 8.4, 6.9, 4.9 Hz, 1H), 3.00 (q, *J* = 7.6 Hz, 1H), 2.70 – 2.62 (m, 1H), 2.32 (s, 3H), 2.25 (s, 3H), 2.11 – 1.98 (m, 1H), 1.97 – 1.88 (m, 2H), 1.86 – 1.80 (m, 1H), 1.22 (d, *J* = 7.0 Hz, 3H); <sup>13</sup>C NMR (151 MHz, CDCl<sub>3</sub>) δ 200.02, 156.83, 140.56, 138.79, 137.16, 134.45, 129.05, 128.95, 128.82, 114.49, 113.19, 62.62, 55.14, 53.47, 52.52, 28.86, 25.02, 19.60, 19.46, 13.74; HRMS (DART) *m/z* Calcd for C<sub>22</sub>H<sub>27</sub>NO<sub>2</sub>S (MH<sup>+</sup>): 370.1835; found: 370.1833.

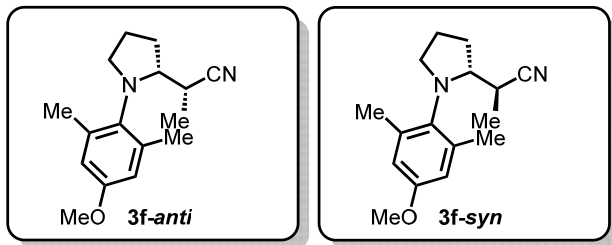

### 2-(1-(4-Methoxy-2,6-dimethylphenyl)pyrrolidin-2-yl)propanenitrile (**3f**)

1-(4-Methoxy-2,6-dimethylphenyl)pyrrolidine **1a** (0.2 mmol, 1.0 equiv.) was reacted with acrylonitrile **2f** (0.5 mmol, 2.5 equiv.) following the **General Procedure for B(C<sub>6</sub>F<sub>5</sub>)<sub>3</sub>-Catalyzed Racemic Mannich Reactions** using B(C<sub>6</sub>F<sub>5</sub>)<sub>3</sub> (10 mol%) as the Lewis acid catalyst, benzene (0.4 mL) as the solvent and was carried out for 48 h at 70 °C. <sup>1</sup>H NMR analysis of the crude material revealed that **3f-anti** and **3f-syn** were obtained in the ratio of 1.3:1. After purification by column chromatography (hexanes: Et<sub>2</sub>O = 10:1), **3f** was obtained as a mixture of diastereomers (25.9 mg, 50%). Further purification was carried out by PTLC using hexanes: Et<sub>2</sub>O = 20:1 as the eluent to separate **3f-anti** and **3f-syn**.

**3f-anti**: <sup>1</sup>H NMR (600 MHz, CDCl<sub>3</sub>) δ 6.60 (d, *J* = 3.0 Hz, 1H), 6.56 (d, *J* = 3.0 Hz, 1H), 3.80 – 3.72 (m, 4H), 3.36 (td, *J* = 8.0, 2.5 Hz, 1H), 3.02 (td, *J* = 8.9, 6.6 Hz, 1H), 2.53 (qd, *J* = 7.2, 3.5 Hz, 1H), 2.34 (s, 3H), 2.28 – 2.23 (m, 1H), 2.22 (s, 3H), 2.14 – 2.09 (m, 1H), 2.01 – 1.90 (m, 2H), 1.18 (d, *J* = 7.3 Hz, 3H); <sup>13</sup>C NMR (151 MHz, CDCl<sub>3</sub>) δ 156.90, 140.27, 137.84, 137.15, 122.67, 114.79, 113.33, 63.27, 55.18, 53.61, 32.33, 29.68, 25.28, 19.35, 19.21, 13.96; IR (neat) 2951, 2242, 2228, 1603, 1483, 1464, 1318, 1262, 1192, 1154, 1068, 837 cm<sup>-1</sup>; HRMS (DART) *m/z* Calcd for C<sub>16</sub>H<sub>23</sub>N<sub>2</sub>O (MH<sup>+</sup>): 259.1810; found: 259.1807.

**3f-syn**: <sup>1</sup>H NMR (600 MHz, CDCl<sub>3</sub>) δ 6.62 (d, *J* = 3.0 Hz, 1H), 6.56 (d, *J* = 3.0 Hz, 1H), 3.76 (s, 3H), 3.46 (dt, *J* = 8.0, 3.9 Hz, 1H), 3.35 (td, *J* = 7.8, 3.2 Hz, 1H), 3.10 – 3.02 (m, 1H), 2.56 (qd, *J* = 7.3, 3.7 Hz, 1H), 2.39 (s, 3H), 2.30 – 2.24 (m, 1H), 2.23 – 2.17 (m, 4H), 2.04 (td, *J* = 8.3, 3.9 Hz, 1H), 1.97 (dq, *J* = 11.2, 3.7 Hz, 1H), 1.15 (d, *J* = 7.3 Hz, 3H); <sup>13</sup>C NMR (151 MHz, CDCl<sub>3</sub>) δ 157.06, 141.27, 137.95, 136.32, 122.75, 114.76, 113.22, 64.69, 55.20, 52.47, 31.66, 28.33, 24.69, 19.22, 19.14, 15.56; IR (neat) 2951, 2837, 2239, 1602, 1544, 1483, 1464,

1318, 1267, 1192, 1155, 1067, 858  $\text{cm}^{-1}$ ; **HRMS** (DART)  $m/z$  Calcd for  $\text{C}_{16}\text{H}_{23}\text{N}_2\text{O}$  ( $\text{MH}^+$ ): 259.1810; found: 259.1816.

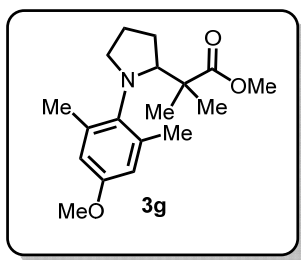

**Methyl 2-(1-(4-methoxy-2,6-dimethylphenyl)pyrrolidin-2-yl)-2-methylpropanoate (3g)**

1-(4-Methoxy-2,6-dimethylphenyl)pyrrolidine **1a** (0.2 mmol, 1.0 equiv.) was reacted with methyl methacrylate **2g** (0.24 mmol, 1.2 equiv.) following the **General Procedure for  $\text{B}(\text{C}_6\text{F}_5)_3$ -Catalyzed Racemic Mannich Reactions** using  $\text{B}(\text{C}_6\text{F}_5)_3$  (10 mol%) as the Lewis acid catalyst, benzene (0.4 mL) as the solvent and was carried out for 24 h at 70  $^\circ\text{C}$ .

After purification by column chromatography (hexanes:  $\text{Et}_2\text{O}$  = 40:1), **3g** was obtained as a colorless oil (59.1 mg, 97%).

**$^1\text{H}$  NMR** (600 MHz,  $\text{CDCl}_3$ )  $\delta$  6.54 (q,  $J$  = 3.1 Hz, 2H), 4.05 (dd,  $J$  = 9.4, 2.2 Hz, 1H), 3.73 (s, 3H), 3.29 (ddd,  $J$  = 9.1, 6.9, 2.5 Hz, 1H), 3.07 (s, 3H), 2.90 (td,  $J$  = 8.9, 6.8 Hz, 1H), 2.29 (s, 3H), 2.25 (s, 3H), 2.13 – 2.05 (m, 1H), 1.92 – 1.80 (m, 3H), 1.11 (s, 3H), 1.08 (s, 3H);  **$^{13}\text{C}$  NMR** (151 MHz,  $\text{CDCl}_3$ )  $\delta$  177.75, 156.09, 139.88, 139.75, 136.75, 114.62, 112.92, 66.82, 55.14, 54.48, 50.89, 47.67, 27.60, 25.61, 23.22, 19.66, 19.60, 19.38; **IR** (neat) 2947, 2836, 1731, 1602, 1466, 1315, 1253, 1191, 1128, 1069, 839  $\text{cm}^{-1}$ ; **HRMS** (DART) Calcd for  $\text{C}_{18}\text{H}_{28}\text{NO}_3$  ( $\text{MH}^+$ ): 306.2069; found: 306.2067.

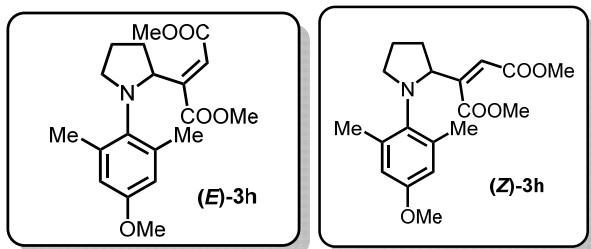

### Dimethyl 2-(1-(4-methoxy-2,6-dimethylphenyl)pyrrolidin-2-yl)fumarate (**3h**)

1-(4-Methoxy-2,6-dimethylphenyl)pyrrolidine **1a** (0.2 mmol, 1.0 equiv.) was reacted with dimethyl but-2-ynedioate **2h** (0.24 mmol, 1.2 equiv.) following the **General Procedure for B(C<sub>6</sub>F<sub>5</sub>)<sub>3</sub>-Catalyzed Racemic Mannich Reactions** using B(C<sub>6</sub>F<sub>5</sub>)<sub>3</sub> (10 mol%) as the Lewis acid catalyst, benzene (0.4 mL) as the solvent and was carried out for 24 h at 70 °C. <sup>1</sup>H NMR analysis of the crude material revealed that (*E*)-**3h** and (*Z*)-**3h** were obtained in the ratio of 1:1.6. After purification by column chromatography (hexanes: Et<sub>2</sub>O = 5:1), (*E*)-**3h** was obtained as yellow liquid (29.8 mg, 21%) and (*Z*)-**3h** was obtained as colorless liquid (42.5 mg, 31%). The relative configuration was assigned based on NOESY experiments (see SI Section 8 for NOE spectra).

(*E*)-**3h**: <sup>1</sup>H NMR (600 MHz, CDCl<sub>3</sub>) δ 6.51 (s, 2H), 6.27 (s, 1H), 5.50 (dd, *J* = 9.6, 4.2 Hz, 1H), 3.77 (s, 3H), 3.72 (s, 3H), 3.61 (s, 3H), 3.44 – 3.39 (m, 1H), 3.06 – 3.00 (m, 1H), 2.47 – 2.41 (m, 1H), 2.35 – 2.09 (m, 8H), 2.06 – 1.95 (m, 1H); <sup>13</sup>C NMR (126 MHz, CDCl<sub>3</sub>) δ 167.82, 165.81, 156.51, 152.38, 137.97, 124.82, 114.52, 113.01, 58.58, 55.10, 53.87, 51.91, 51.61, 31.95, 25.91, 19.11; IR (neat) 2951, 2848, 1729, 1603, 1434, 1256, 1206, 1154, 1114, 1069, 855 cm<sup>-1</sup>; HRMS (DART) *m/z* Calcd for C<sub>19</sub>H<sub>26</sub>NO<sub>5</sub> (MH<sup>+</sup>): 348.1811; found: 348.1822.

(*Z*)-**3h**: <sup>1</sup>H NMR (600 MHz, CDCl<sub>3</sub>) δ 6.55 (s, 2H), 5.99 (d, *J* = 1.1 Hz, 1H), 4.35 – 4.28 (m, 1H), 3.77 (d, *J* = 1.7 Hz, 3H), 3.74 (d, *J* = 1.7 Hz, 3H), 3.67 (d, *J* = 1.8 Hz, 3H), 3.41 – 3.37 (m, 1H), 3.01 (dt, *J* = 10.2, 7.8 Hz, 1H), 2.32 – 2.28 (m, 7H), 2.16 – 2.09 (m, 1H), 2.04 – 1.95 (m, 1H); <sup>13</sup>C NMR (151 MHz, CDCl<sub>3</sub>) δ 168.74, 165.68, 156.67, 153.77, 137.33, 119.00, 114.06, 113.51, 64.34, 55.14, 52.96, 52.16, 51.73, 31.92, 24.69, 19.61; IR (neat) 2950, 2838,

1724, 1602, 1434, 1316, 1255, 1193, 1153, 1067, 854  $\text{cm}^{-1}$ ; **HRMS** (DART)  $m/z$  Calcd for  $\text{C}_{19}\text{H}_{26}\text{NO}_5$  ( $\text{MH}^+$ ): 348.1811; found: 348.1810.

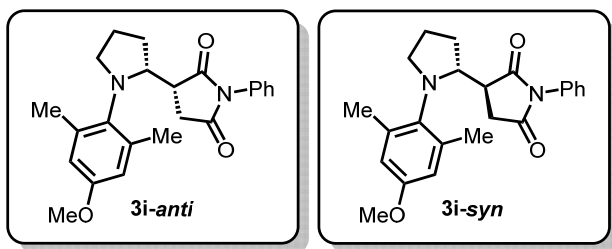

### 1-(4-Methoxy-2,6-dimethylphenyl)-1'-phenyl-[2,3'-bipyrrolidine]-2',5'-dione (**3i**)

1-(4-Methoxy-2,6-dimethylphenyl)pyrrolidine **1a** (0.2 mmol, 1.0 equiv.) was reacted with 1-phenyl-1*H*-pyrrole-2,5-dione **2i** (0.24 mmol, 1.2 equiv.) following the **General Procedure for B(C<sub>6</sub>F<sub>5</sub>)<sub>3</sub>-Catalyzed Racemic Mannich Reactions** using B(C<sub>6</sub>F<sub>5</sub>)<sub>3</sub> (5.0 mol%) as the Lewis acid catalyst, benzene (0.2 mL) as the solvent and was carried out for 12 h at 22 °C. <sup>1</sup>H NMR analysis of the crude material revealed that **3i-anti** and **3i-syn** were obtained in the ratio of 4.5:1. After purification by column chromatography (hexanes: EtOAc = 5:1), **3i** was obtained as a mixture of diastereomers (75 mg, 99%). Further purification was carried out by PTLC to separate **3i-anti** and **3i-syn**.

**3i-anti**: <sup>1</sup>H NMR (500 MHz, CDCl<sub>3</sub>)  $\delta$  7.46 (t,  $J$  = 7.7 Hz, 2H), 7.41 – 7.35 (m, 1H), 7.27 – 7.22 (m, 2H), 6.62 – 6.56 (m, 2H), 4.31 (td,  $J$  = 6.8, 4.0 Hz, 1H), 3.76 (s, 3H), 3.38 – 3.30 (m, 1H), 3.16 – 3.07 (m, 1H), 2.98 – 2.93 (m, 1H), 2.89 (dd,  $J$  = 18.8, 4.0 Hz, 1H), 2.71 (dd,  $J$  = 18.8, 9.2 Hz, 1H), 2.32 (s, 3H), 2.26 (s, 3H), 2.14 – 1.98 (m, 3H), 1.64 (dt,  $J$  = 11.2, 6.6 Hz, 1H); <sup>13</sup>C NMR (101 MHz, CDCl<sub>3</sub>)  $\delta$  177.83, 176.39, 157.02, 139.77, 138.32, 135.60, 131.86, 129.14, 128.55, 126.40, 114.92, 113.36, 60.83, 55.23, 51.83, 43.23, 30.71, 26.29, 24.59, 19.84, 18.86; **IR** (neat) 2946, 1711, 1599, 1498, 1384, 1181, 1154, 692  $\text{cm}^{-1}$ ; **HRMS** (DART)  $m/z$  Calcd for C<sub>23</sub>H<sub>27</sub>N<sub>2</sub>O<sub>3</sub> ( $\text{MH}^+$ ): 379.2022; found: 379.2039.

**3i-syn**: <sup>1</sup>H NMR (500 MHz, CDCl<sub>3</sub>)  $\delta$  7.34 – 7.27 (m, 3H), 6.79 – 6.74 (m, 2H), 6.55 – 6.49 (m, 2H), 4.53 (td,  $J$  = 7.0, 2.9 Hz, 1H), 3.72 (s, 3H), 3.44 (dt,  $J$  = 8.8, 6.2 Hz, 1H), 3.12 (dd,  $J$  = 18.1, 4.8 Hz, 1H), 3.07 – 2.96 (m, 2H), 2.78 (dd,  $J$  = 18.1, 9.5 Hz, 1H), 2.35 – 2.27 (m, 4H), 2.25 (s, 3H), 2.04 – 1.95 (m, 2H), 1.89 – 1.80 (m, 1H); <sup>13</sup>C NMR (126 MHz, CDCl<sub>3</sub>)  $\delta$

177.40, 176.25, 156.94, 139.01, 138.23, 136.96, 131.73, 128.69, 128.19, 126.28, 115.23, 113.44, 59.44, 55.14, 54.07, 45.55, 31.70, 29.86, 24.66, 20.26, 18.77; **IR** (neat) 2951, 1709, 1600, 1499, 1382, 1180, 1068, 694  $\text{cm}^{-1}$ ; **HRMS** (DART)  $m/z$  Calcd for  $\text{C}_{23}\text{H}_{27}\text{N}_2\text{O}_3$  ( $\text{MH}^+$ ): 379.2022; found: 379.2036.

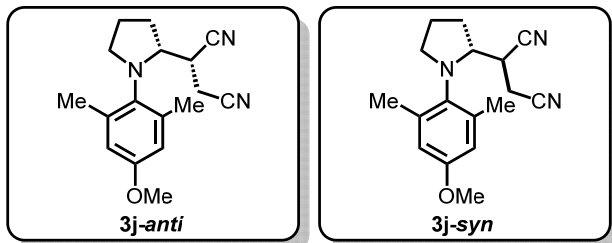

### 2-(1-(4-Methoxy-2,6-dimethylphenyl)pyrrolidin-2-yl)succinonitrile (**3j**)

1-(4-Methoxy-2,6-dimethylphenyl)pyrrolidine **1a** (0.2 mmol, 1.0 equiv.) was reacted with fumaronitrile **2j** (0.5 mmol, 2.5 equiv.) following the **General Procedure for B(C<sub>6</sub>F<sub>5</sub>)<sub>3</sub>-Catalyzed Racemic Mannich Reactions** using B(C<sub>6</sub>F<sub>5</sub>)<sub>3</sub> (10 mol%) as the Lewis acid catalyst, benzene (0.4 mL) as the solvent and was carried out for 48 h at 70 °C. <sup>1</sup>H NMR analysis of the crude material revealed that **3j-anti** and **3j-syn** were obtained in the ratio of 1.2:1. After purification by column chromatography (hexanes: EtOAc = 3:1), **3j-anti** was obtained as a red oil (28.3 mg, 50%) and **3j-syn** was obtained as a red oil (23.6 mg, 41%).

**3j-anti:** <sup>1</sup>H NMR (500 MHz, Acetone-*d*<sub>6</sub>) δ 6.61 (s, 2H), 3.75 (s, 3H), 3.47 (tdd, *J* = 7.6, 5.6, 1.3 Hz, 1H), 3.42 – 3.38 (m, 1H), 3.34 (ddd, *J* = 8.2, 6.9, 1.3 Hz, 1H), 3.29 (tdd, *J* = 8.3, 3.1, 1.2 Hz, 1H), 3.19 – 3.13 (m, 2H), 3.11 – 3.04 (m, 1H), 2.83 – 2.77 (m, 1H), 2.41 – 2.33 (m, 1H), 2.26 (s, 6H), 2.07 – 2.01 (m, 1H); <sup>13</sup>C NMR (126 MHz, Acetone-*d*<sub>6</sub>) δ 157.14, 139.18, 136.83, 118.91, 116.76, 113.54, 54.47, 53.73, 49.52, 40.88, 31.89, 29.96, 19.60, 18.07; **IR** (neat) 2958, 2917, 2839, 2190, 1601, 1485, 1468, 1321, 1275, 1193, 1154, 1066, 856 cm<sup>-1</sup>; **HRMS** (DART) *m/z* Calcd for C<sub>17</sub>H<sub>22</sub>N<sub>3</sub>O (MH<sup>+</sup>): 284.1763; found: 284.1762.

**3j-syn:** <sup>1</sup>H NMR (400 MHz, Acetone-*d*<sub>6</sub>) δ 6.57 (s, 2H), 3.70 (s, 3H), 3.49 – 3.37 (m, 2H), 3.30 (dt, *J* = 8.8, 7.6 Hz, 1H), 3.25 – 3.19 (m, 2H), 3.14 – 2.99 (m, 2H), 2.80 – 2.73 (m, 1H), 2.31 – 2.24 (m, 1H), 2.23 (s, 6H), 2.00 – 1.89 (m, 1H); <sup>13</sup>C NMR (126 MHz, Acetone-*d*<sub>6</sub>) δ 157.16, 139.19, 136.80, 118.87, 116.77, 113.55, 54.47, 53.48, 49.54, 40.86, 31.87, 30.15, 19.41, 18.06; **IR** (neat) 2922, 2837, 2188, 1602, 1485, 1321, 1275, 1193, 1154, 1066, 856 cm<sup>-1</sup>; **HRMS** (DART) *m/z* Calcd for C<sub>17</sub>H<sub>22</sub>N<sub>3</sub>O (MH<sup>+</sup>): 284.1763; found: 284.1772.



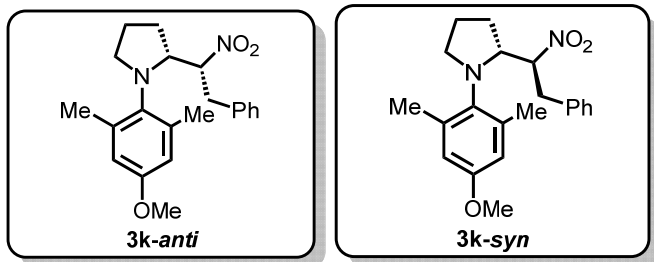

### 1-(4-Methoxy-2,6-dimethylphenyl)-2-(1-nitro-2-phenylethyl)pyrrolidine (**3k**)

1-(4-Methoxy-2,6-dimethylphenyl)pyrrolidine **1a** (0.2 mmol, 1.0 equiv.) was reacted with (*E*)-(2-nitrovinyl)benzene **2k** (0.24 mmol, 1.2 equiv.) following the **General Procedure for B(C<sub>6</sub>F<sub>5</sub>)<sub>3</sub>-Catalyzed Racemic Mannich Reactions** using B(C<sub>6</sub>F<sub>5</sub>)<sub>3</sub> (10 mol%) as the Lewis acid catalyst, benzene (0.4 mL) as the solvent and was carried out for 24 h at 70 °C. <sup>1</sup>H NMR analysis of the crude material revealed that **3k-anti** and **3k-syn** were obtained in the ratio of 1.2:1. After purification by column chromatography (hexanes: Et<sub>2</sub>O = 15:1), **3k** was obtained as a mixture of diastereomers (59.7 mg, 84%). Further purification was carried out by PTLC using hexanes: Et<sub>2</sub>O = 4:1 as the eluent to separate **3k-anti** and **3k-syn**.

**3k-anti:** <sup>1</sup>H NMR (500 MHz, CDCl<sub>3</sub>) δ 7.28 (t, *J* = 7.3 Hz, 2H), 7.24 – 7.18 (m, 3H), 6.51 (s, 2H), 4.78 (dd, *J* = 12.3, 5.1 Hz, 1H), 4.67 (dd, *J* = 12.2, 9.9 Hz, 1H), 3.71 (s, 3H), 3.44 (td, *J* = 10.2, 5.1 Hz, 1H), 3.36 – 3.29 (m, 1H), 3.28 – 3.23 (m, 1H), 2.83 (dd, *J* = 8.2, 2.6 Hz, 2H), 2.68 (p, *J* = 8.7 Hz, 1H), 2.24 – 2.17 (m, 7H), 1.87 (p, *J* = 9.3 Hz, 1H); <sup>13</sup>C NMR (151 MHz, CDCl<sub>3</sub>) δ 156.75, 139.42, 139.23, 137.31, 128.81, 127.71, 127.47, 113.50, 80.12, 55.42, 55.21, 50.46, 49.04, 43.13, 31.42, 18.81; IR (neat) 2918, 2850, 1552, 1485, 1378, 1154, 1060, 701 cm<sup>-1</sup>; HRMS (DART) *m/z* Calcd for C<sub>21</sub>H<sub>27</sub>N<sub>2</sub>O<sub>3</sub> (MH<sup>+</sup>): 355.2022; found: 355.2027.

**3k-syn:** <sup>1</sup>H NMR (500 MHz, CDCl<sub>3</sub>) δ 7.35 (t, *J* = 7.5 Hz, 2H), 7.30 – 7.24 (m, 3H), 6.58 (s, 2H), 4.67 (t, *J* = 11.2 Hz, 1H), 4.58 (dd, *J* = 12.1, 5.0 Hz, 1H), 3.76 (s, 3H), 3.50 – 3.42 (m, 1H), 3.33 (t, *J* = 8.5 Hz, 1H), 3.20 – 3.09 (m, 3H), 2.68 – 2.58 (m, 1H), 2.24 (s, 6H), 1.74 (d, *J* = 8.1 Hz, 1H), 1.63 (t, *J* = 10.3 Hz, 1H); <sup>13</sup>C NMR (151 MHz, CDCl<sub>3</sub>) δ 156.87, 139.55, 139.23, 137.28, 128.88, 127.74 – 127.71 (m), 127.68, 113.58, 80.09, 55.24, 54.86, 49.70, 48.87, 43.16, 31.80, 18.81; IR (neat) 2920, 2851, 1552, 1485, 1378, 1278, 1154, 1029, 858 cm<sup>-1</sup>; HRMS (DART) *m/z* Calcd for C<sub>21</sub>H<sub>27</sub>N<sub>2</sub>O<sub>3</sub> (MH<sup>+</sup>): 355.2022; found: 355.2017.

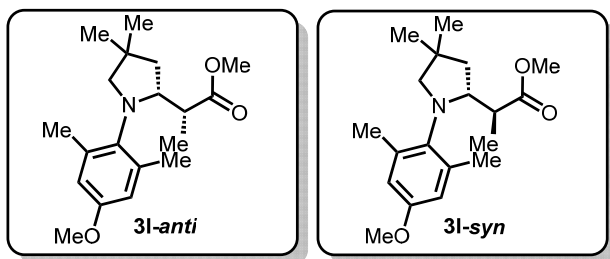

**Methyl 2-(1-(4-methoxy-2,6-dimethylphenyl)-4,4-dimethylpyrrolidin-2-yl)propanoate (3l)**

1-(4-Methoxy-2,6-dimethylphenyl)-3,3-dimethylpyrrolidine **1l** (0.2 mmol, 1.0 equiv.) was reacted with methyl acrylate **2a** (0.24 mmol, 1.2 equiv.) following the **General Procedure for B(C<sub>6</sub>F<sub>5</sub>)<sub>3</sub>-Catalyzed Racemic Mannich Reactions** using B(C<sub>6</sub>F<sub>5</sub>)<sub>3</sub> (5.0 mol%) as the Lewis acid catalyst, benzene (0.2 mL) as the solvent and was carried out for 12 h at 22 °C. <sup>1</sup>H NMR analysis of the crude material revealed that **3l-anti** and **3l-syn** were obtained in the ratio of 3.0:1. After purification by column chromatography (hexanes: Et<sub>2</sub>O = 65:1), **3l-anti** was obtained as a white solid (44.9 mg, 70%), **3l-syn** was obtained as a colorless oil (15.6 mg, 24%).

**3l-anti:** <sup>1</sup>H NMR (600 MHz, CDCl<sub>3</sub>) δ 6.55 (d, *J* = 3.0 Hz, 1H), 6.48 (d, *J* = 3.0 Hz, 1H), 4.05 (q, *J* = 7.9, 7.4 Hz, 1H), 3.73 (d, *J* = 1.0 Hz, 3H), 3.11 (s, 3H), 3.08 (d, *J* = 8.3 Hz, 1H), 2.82 (d, *J* = 8.3 Hz, 1H), 2.36 (p, *J* = 6.9 Hz, 1H), 2.29 (s, 3H), 2.29 (s, 3H), 1.81 (dd, *J* = 12.2, 6.8 Hz, 1H), 1.52 (dd, *J* = 12.2, 8.0 Hz, 1H), 1.20 (s, 3H), 1.15 (s, 3H), 1.02 (d, *J* = 7.0 Hz, 3H). <sup>13</sup>C NMR (151 MHz, CDCl<sub>3</sub>) δ 176.13, 156.49, 140.51, 139.29, 135.67, 114.06, 112.99, 65.99, 61.88, 55.13, 50.99, 45.26, 44.71, 36.29, 29.42, 28.57, 19.67, 19.42, 14.69; IR (neat) 2950, 1734, 1602, 1482, 1465, 1269, 1193, 1154, 854 cm<sup>-1</sup>; HRMS (DART) *m/z* Calcd for C<sub>19</sub>H<sub>30</sub>NO<sub>3</sub> (MH<sup>+</sup>): 320.2226; found: 320.2241.

**3l-syn:** <sup>1</sup>H NMR (600 MHz, CDCl<sub>3</sub>) δ 6.57 (d, *J* = 3.0 Hz, 1H), 6.50 (d, *J* = 3.0 Hz, 1H), 3.90 (q, *J* = 7.1 Hz, 1H), 3.75 (s, 3H), 3.57 (s, 3H), 3.03 (d, *J* = 8.4 Hz, 1H), 2.82 (d, *J* = 8.4 Hz, 1H), 2.54 (p, *J* = 7.0 Hz, 1H), 2.28 (s, 3H), 2.27 (s, 3H), 1.88 (dd, *J* = 12.6, 7.7 Hz, 1H), 1.67 (dd, *J* = 12.6, 6.3 Hz, 1H), 1.22 (s, 3H), 1.12 (s, 3H), 0.87 (dd, *J* = 6.9, 0.8 Hz, 3H); <sup>13</sup>C NMR (151 MHz, CDCl<sub>3</sub>) δ 175.99, 156.37, 139.80, 137.76, 137.31, 114.38, 113.25, 66.51,

63.09, 55.12, 51.18, 46.03, 44.69, 36.78, 29.18, 28.44, 19.80, 19.35, 15.36; **IR** (neat) 2951, 1735, 1603, 1483, 1465, 1256, 1192, 1155, 1069, 855  $\text{cm}^{-1}$ ; **HRMS** (DART)  $m/z$  Calcd for  $\text{C}_{19}\text{H}_{30}\text{NO}_3$  ( $\text{MH}^+$ ): 320.2226; found: 320.2240.

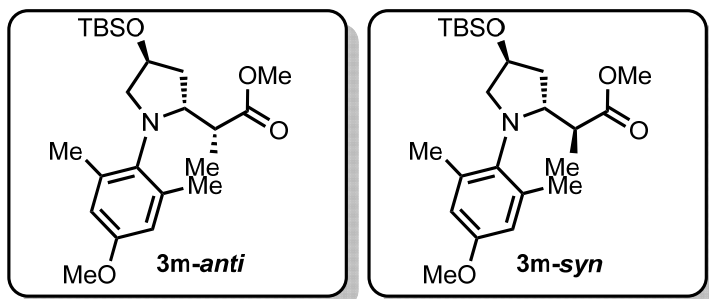

**Methyl 2-(4-((*tert*-butyldimethylsilyl)oxy)-1-(4-methoxy-2,6-dimethylphenyl)pyrrolidin-2-yl)propanoate (**3m**)**

3-((*tert*-Butyldimethylsilyl)oxy)-1-(4-methoxy-2,6-dimethylphenyl)pyrrolidine **1m** (0.2 mmol, 1.0 equiv.) was reacted with methyl acrylate **2a** (0.24 mmol, 1.2 equiv.) following the **General Procedure for B(C<sub>6</sub>F<sub>5</sub>)<sub>3</sub>-Catalyzed Racemic Mannich Reactions** using B(C<sub>6</sub>F<sub>5</sub>)<sub>3</sub> (5.0 mol%) as the Lewis acid catalyst, benzene (0.2 mL) as the solvent and was carried out for 12 h at 22 °C. <sup>1</sup>H NMR analysis of the crude material revealed that **3m-anti**, **3m-anti'** and **3m-syn**, **3m-syn'** were obtained in the ratio of 6.9:5.9:3.0:1. After purification by column chromatography (hexanes: Et<sub>2</sub>O = 13:1), **3m** was obtained as a mixture of diastereomers (69 mg, 82%). Further purification was carried out by PTLC to separate **3m-anti** and **3m-syn**. The relative configuration of the pyrrolidine substituents was assigned *anti* based on NOESY experiments (See SI Section 8 for NOE spectra).

**3m-anti:** <sup>1</sup>H NMR (600 MHz, CDCl<sub>3</sub>) δ 6.56 (d, *J* = 3.0 Hz, 1H), 6.53 (d, *J* = 3.1 Hz, 1H), 4.41 (t, *J* = 4.7 Hz, 1H), 4.09 – 4.04 (m, 1H), 3.74 (s, 3H), 3.55 (dd, *J* = 9.2, 5.2 Hz, 1H), 3.47 (s, 3H), 2.81 (dd, *J* = 9.2, 3.6 Hz, 1H), 2.42 (qd, *J* = 6.9, 5.1 Hz, 1H), 2.33 (s, 3H), 2.23 (s, 3H), 2.06 (ddd, *J* = 12.6, 7.0, 5.6 Hz, 1H), 1.98 (ddd, *J* = 12.1, 7.1, 4.3 Hz, 1H), 0.97 (d, *J* = 7.0 Hz, 3H), 0.89 (s, 9H), 0.08 (s, 3H), 0.04 (s, 3H); <sup>13</sup>C NMR (151 MHz, CDCl<sub>3</sub>) δ 175.69, 156.49, 140.12, 137.95, 137.61, 114.40, 112.91, 70.94, 61.96, 61.80, 55.14, 51.11, 44.49, 39.07, 25.84, 19.25, 19.06, 18.08, 14.14, -4.75, -4.81.; IR (neat) 2951, 2929, 2856, 1735, 1603, 1464, 1318, 1253, 1154, 1068, 1024, 832, 774 cm<sup>-1</sup>; HRMS (DART) *m/z* Calcd for C<sub>23</sub>H<sub>40</sub>NO<sub>4</sub>Si (MH<sup>+</sup>): 422.2727; found: 422.2724.

**3m-syn:**  $^1\text{H NMR}$  (600 MHz,  $\text{CDCl}_3$ )  $\delta$  6.54 (s, 1H), 6.52 (s, 1H), 4.38 (dp,  $J = 5.1, 2.6$  Hz, 1H), 4.14 (q,  $J = 7.3$  Hz, 1H), 3.73 (s, 3H), 3.60 (dd,  $J = 9.5, 4.9$  Hz, 1H), 3.18 (s, 3H), 2.83 (d,  $J = 9.5$  Hz, 1H), 2.34 (s, 3H), 2.32 – 2.27 (m, 1H), 2.25 (s, 3H), 1.97 (ddd,  $J = 12.6, 6.3, 2.8$  Hz, 1H), 1.78 – 1.72 (m, 1H), 1.06 (d,  $J = 7.0$  Hz, 3H), 0.89 (s, 9H), 0.08 (s, 3H), 0.04 (s, 3H);  $^{13}\text{C NMR}$  (151 MHz,  $\text{CDCl}_3$ )  $\delta$  176.00, 156.64, 140.64, 139.64, 136.23, 114.17, 112.69, 70.84, 62.00, 60.91, 55.13, 51.04, 45.25, 39.67, 25.80, 19.23, 19.02, 18.04, 14.17, -4.77, -4.81; **IR** (neat) 2952, 2928, 2856, 1737, 1604, 1465, 1319, 1258, 1155, 1069, 1028, 853, 775  $\text{cm}^{-1}$ ; **HRMS** (DART)  $m/z$  Calcd for  $\text{C}_{23}\text{H}_{40}\text{NO}_4\text{Si}$  ( $\text{MH}^+$ ): 422.2727; found: 422.2741.

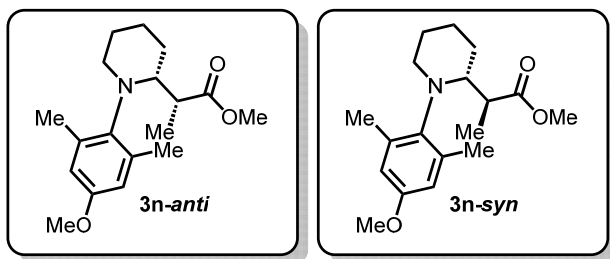

### Methyl 2-(1-(4-methoxy-2,6-dimethylphenyl)piperidin-2-yl)propanoate (**3n**)

1-(4-Methoxy-2,6-dimethylphenyl)piperidine **1n** (0.2 mmol, 1.0 equiv.) was reacted with methyl acrylate **2a** (0.24 mmol, 1.2 equiv.) following the **General Procedure for B(C<sub>6</sub>F<sub>5</sub>)<sub>3</sub>-Catalyzed Racemic Mannich Reactions** using B(C<sub>6</sub>F<sub>5</sub>)<sub>3</sub> (5.0 mol%) as the Lewis acid catalyst, benzene (0.2 mL) as the solvent and was carried out for 12 h at 22 °C. <sup>1</sup>H NMR analysis of the crude material revealed that **3n-anti** and **3n-syn** were obtained in the ratio of 10:1.0. After purification by column chromatography (hexanes: Et<sub>2</sub>O = 19:1), **3n** was obtained as a mixture of diastereomers (39 mg, 63%). Further purification was carried out by PTLC using DCM: hexanes = 3:2 as the eluent to separate **3n-anti** and **3n-syn**.

**3n-anti:** <sup>1</sup>H NMR (600 MHz, CDCl<sub>3</sub>) δ 6.60 (d, *J* = 3.0 Hz, 1H), 6.43 (d, *J* = 3.0 Hz, 1H), 3.73 (s, 3H), 3.67 (dt, *J* = 9.7, 3.3 Hz, 1H), 3.60 (s, 3H), 3.10 – 3.04 (m, 1H), 2.84 – 2.79 (m, 1H), 2.44 (qd, *J* = 7.0, 3.6 Hz, 1H), 2.37 (s, 3H), 2.30 (s, 3H), 1.89 – 1.83 (m, 1H), 1.62 – 1.56 (m, 2H), 1.48 – 1.34 (m, 3H), 0.86 (d, *J* = 7.0 Hz, 3H); <sup>13</sup>C NMR (151 MHz, CDCl<sub>3</sub>) δ 175.75, 156.37, 139.40, 139.16, 138.38, 114.25, 113.48, 59.55, 55.01, 52.36, 51.48, 41.05, 27.32, 26.71, 24.93, 20.00, 19.10, 9.73; IR (neat) 2922, 2851, 1736, 1602, 1481, 1464, 1211, 1169, 1151, 1111, 1069, 855 cm<sup>-1</sup>; HRMS (DART) *m/z* Calcd for C<sub>18</sub>H<sub>28</sub>NO<sub>3</sub> (MH<sup>+</sup>): 306.2069; found: 306.2078.

**3n-syn:** <sup>1</sup>H NMR (600 MHz, CDCl<sub>3</sub>) δ 6.60 (d, *J* = 3.0 Hz, 1H), 6.44 (d, *J* = 3.0 Hz, 1H), 3.75 (s, 3H), 3.49 (s, 3H), 3.23 (dt, *J* = 10.6, 2.9 Hz, 1H), 3.00 (td, *J* = 11.7, 3.1 Hz, 1H), 2.84 (dd, *J* = 11.9, 3.8 Hz, 1H), 2.53 (qd, *J* = 7.3, 3.3 Hz, 1H), 2.26 (s, 3H), 2.22 (s, 3H), 1.89 (dt, *J* = 12.8, 4.1 Hz, 1H), 1.84 – 1.79 (m, 1H), 1.66 – 1.50 (m, 3H), 1.33 (tdt, *J* = 12.8, 9.0, 3.9 Hz, 1H), 1.08 (d, *J* = 7.2 Hz, 3H); <sup>13</sup>C NMR (151 MHz, CDCl<sub>3</sub>) δ 175.16, 156.35, 140.27,

140.09, 137.64, 113.81, 113.39, 62.81, 55.08, 52.67, 50.96, 40.51, 27.88, 26.72, 25.21, 20.01, 19.31, 15.72; **HRMS** (DART) m/z Calcd for C<sub>18</sub>H<sub>28</sub>NO<sub>3</sub> (MH<sup>+</sup>): 306.2069; found: 306.207.

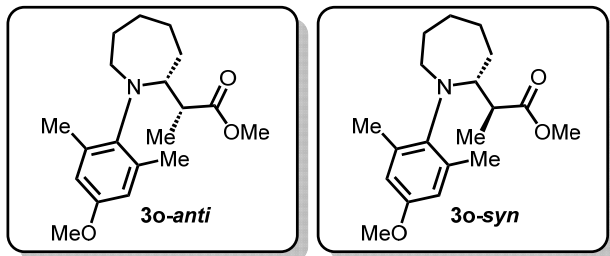

### Methyl 2-(1-(4-methoxy-2,6-dimethylphenyl)azepan-2-yl)propanoate (**3o**)

1-(4-Methoxy-2,6-dimethylphenyl)azepane **1o** (0.2 mmol, 1.0 equiv.) was reacted with methyl acrylate **2a** (0.24 mmol, 1.2 equiv.) following the **General Procedure for B(C<sub>6</sub>F<sub>5</sub>)<sub>3</sub>-Catalyzed Racemic Mannich Reactions** using B(C<sub>6</sub>F<sub>5</sub>)<sub>3</sub> (5.0 mol%) as the Lewis acid catalyst, benzene (0.2 mL) as the solvent and was carried out for 12 h at 22 °C. <sup>1</sup>H NMR analysis of the crude material revealed that **3o-anti** and **3o-syn** were obtained in the ratio of 2.0:1.0. After purification by column chromatography (hexanes: Et<sub>2</sub>O = 32:1), **3o** was obtained as a mixture of diastereomers (42 mg, 66%). Further purification was carried out by PTLC using DCM: hexanes = 3:2 as the eluent to separate **3o-anti** and **3o-syn**.

**3o-anti:** <sup>1</sup>H NMR (500 MHz, CDCl<sub>3</sub>) δ 6.59 – 6.55 (m, 2H), 3.79 (dt, *J* = 10.0, 4.3 Hz, 1H), 3.74 (s, 3H), 3.46 (s, 3H), 3.31 (ddd, *J* = 14.8, 9.9, 1.4 Hz, 1H), 3.15 – 3.07 (m, 1H), 2.45 (qd, *J* = 7.0, 4.1 Hz, 1H), 2.39 (s, 3H), 2.26 (s, 3H), 1.94 – 1.86 (m, 1H), 1.84 – 1.61 (m, 5H), 1.51 (dtt, *J* = 13.8, 9.2, 2.1 Hz, 1H), 1.44 – 1.33 (m, 1H), 1.13 (d, *J* = 7.0 Hz, 3H); <sup>13</sup>C NMR (126 MHz, CDCl<sub>3</sub>) δ 176.17, 155.89, 141.39, 138.66, 137.90, 114.30, 113.83, 62.11, 55.16, 53.14, 51.31, 43.91, 32.32, 30.01, 29.34, 26.25, 20.43, 19.96, 12.12; IR (neat) 2923, 2849, 1731, 1602, 1481, 1433, 1309, 1253, 1196, 1162, 1069, 853 cm<sup>-1</sup>; HRMS (DART) *m/z* Calcd for C<sub>19</sub>H<sub>30</sub>NO<sub>3</sub> (MH<sup>+</sup>): 320.2226; found: 320.2231.

**3o-syn:** <sup>1</sup>H NMR (600 MHz, CDCl<sub>3</sub>) δ 6.57 (dd, *J* = 22.4, 3.1 Hz, 2H), 3.74 (s, 3H), 3.50 (s, 3H), 3.46 – 3.38 (m, 2H), 3.01 (dd, *J* = 15.1, 5.6 Hz, 1H), 2.50 (qd, *J* = 7.1, 3.2 Hz, 1H), 2.38 (s, 3H), 2.29 (s, 3H), 2.01 – 1.91 (m, 2H), 1.86 – 1.68 (m, 3H), 1.58 (dt, *J* = 13.9, 4.7 Hz, 1H), 1.48 – 1.40 (m, 1H), 1.33 (qt, *J* = 12.1, 3.9 Hz, 1H), 0.99 (d, *J* = 7.1 Hz, 3H); <sup>13</sup>C NMR (151 MHz, CDCl<sub>3</sub>) δ 176.02, 155.64, 141.55, 138.84, 137.01, 114.15, 113.98, 64.74, 55.13, 52.06, 50.99, 44.29, 32.46, 30.80, 30.13, 26.62, 20.59, 19.78, 14.94; IR (neat) 2925, 2851, 1732,



1602, 1482, 1411, 1308, 1254, 1196, 1164, 1070, 853  $\text{cm}^{-1}$ ; **HRMS** (DART)  $m/z$  Calcd for  $\text{C}_{19}\text{H}_{30}\text{NO}_3$  ( $\text{MH}^+$ ): 320.2226; found: 320.2211.

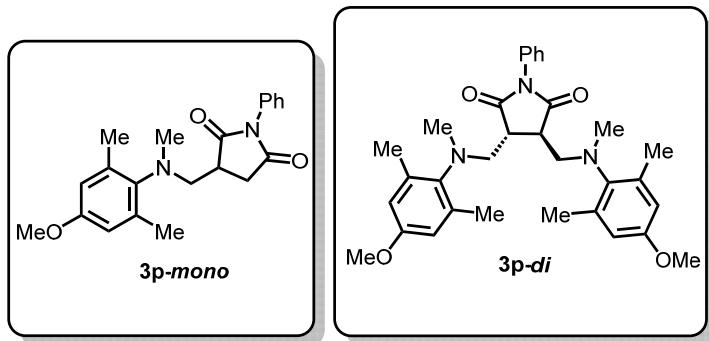

**3-(((4-Methoxy-2,6-dimethylphenyl)(methyl)amino)methyl)-1-phenylpyrrolidine-2,5-dione (3p-mono)**

4-Methoxy-*N,N*,2,6-tetramethylaniline **1p** (0.2 mmol, 1.0 equiv.) was reacted with 1-phenyl-1*H*-pyrrole-2,5-dione **2i** (0.24 mmol, 1.2 equiv.) following the **General Procedure for B(C<sub>6</sub>F<sub>5</sub>)<sub>3</sub>-Catalyzed Racemic Mannich Reactions** using B(C<sub>6</sub>F<sub>5</sub>)<sub>3</sub> (10 mol%) as the Lewis acid catalyst, benzene (0.2 mL) as the solvent and was carried out for 24 h at 70 °C. After purification by column chromatography (hexanes: EtOAc = 4:1), **3p-mono** was obtained as a white solid (44 mg, 62%), **3p-di** was obtained as a white solid (14 mg, 27%).

**3p-mono:** <sup>1</sup>H NMR (600 MHz, CDCl<sub>3</sub>) δ 7.46 (t, *J* = 7.7 Hz, 2H), 7.40 – 7.36 (m, 1H), 7.26 – 7.23 (m, 2H), 6.56 (s, 2H), 3.75 (s, 3H), 3.69 (dd, *J* = 13.2, 4.1 Hz, 1H), 3.36 (dd, *J* = 13.2, 8.4 Hz, 1H), 3.09 (tt, *J* = 8.8, 4.5 Hz, 1H), 2.94 – 2.81 (m, 2H), 2.78 (s, 3H), 2.31 (s, 3H), 2.29 (s, 3H); <sup>13</sup>C NMR (151 MHz, CDCl<sub>3</sub>) δ 180.55, 178.67, 159.44, 144.29, 140.69, 140.49, 134.57, 131.80, 131.20, 129.04, 116.79, 116.71, 59.99, 57.88, 44.59, 43.98, 36.31, 22.11, 21.98; IR (neat) 2929, 2849, 1710, 1599, 1499, 1384, 1177, 1063, 756, 696 cm<sup>-1</sup>; HRMS (DART) *m/z* Calcd for C<sub>21</sub>H<sub>25</sub>N<sub>2</sub>O<sub>3</sub> (MH<sup>+</sup>): 353.1865; found: 353.187.

**3,4-Bis(((4-methoxy-2,6-dimethylphenyl)(methyl)amino)methyl)-1-phenylpyrrolidine-**

**2,5-dione (3p-di):** <sup>1</sup>H NMR (600 MHz, CDCl<sub>3</sub>) δ 7.48 – 7.44 (m, 2H), 7.40 – 7.36 (m, 1H), 7.22 (dt, *J* = 8.4, 1.2 Hz, 2H), 6.51 (d, *J* = 3.0 Hz, 2H), 6.48 (d, *J* = 3.0 Hz, 2H), 3.73 (s, 6H), 3.56 (dd, *J* = 13.5, 5.3 Hz, 2H), 3.40 (dd, *J* = 13.5, 3.5 Hz, 2H), 3.01 (t, *J* = 4.1 Hz, 2H), 2.64 (s, 6H), 2.24 (s, 6H), 2.21 (s, 6H); <sup>13</sup>C NMR (151 MHz, CDCl<sub>3</sub>) δ 180.99, 159.25, 145.08, 140.33, 139.93, 134.80, 131.75, 131.08, 128.98, 116.98, 116.52, 59.49, 57.81, 48.28, 45.00,

22.20, 21.93; **IR** (neat) 2960, 2921, 1710, 1600, 1485, 1368, 1315, 1191, 1154, 1063  $\text{cm}^{-1}$ ;  
**HRMS** (DART)  $m/z$  Calcd for  $\text{C}_{32}\text{H}_{40}\text{N}_3\text{O}_4$  ( $\text{MH}^+$ ): 530.3019; found: 530.3021.

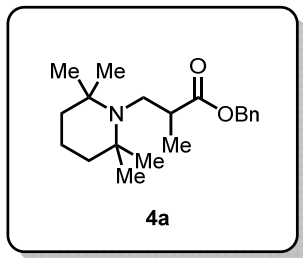

**Benzyl 2-methyl-3-(2,2,6,6-tetramethylpiperidin-1-yl)propanoate (4a)**

1,2,2,6,6-Pentamethylpiperidine **1q** (0.2 mmol, 1.0 equiv.) was reacted with benzyl acrylate **2c** (0.24 mmol, 1.2 equiv.) following the **General Procedure for B(C<sub>6</sub>F<sub>5</sub>)<sub>3</sub>-Catalyzed Racemic Mannich Reactions** using B(C<sub>6</sub>F<sub>5</sub>)<sub>3</sub> (10 mol%) as the Lewis acid catalyst, benzene (0.4 mL) as the solvent and was carried out for 12 h at 70 °C. After purification by column chromatography (hexanes: EtOAc = 10:1), **4a** was obtained as a colorless oil (57.8 mg, 91%).

<sup>1</sup>H NMR (600 MHz, CDCl<sub>3</sub>) δ 7.40 – 7.28 (m, 5H), 5.16 – 5.04 (m, 2H), 2.89 (dd, *J* = 15.4, 7.5 Hz, 1H), 2.64 (td, *J* = 7.5, 5.8 Hz, 1H), 2.48 (dd, *J* = 15.4, 5.6 Hz, 1H), 1.51 (s, 2H), 1.38 (dd, *J* = 6.7, 4.4 Hz, 4H), 1.13 (d, *J* = 7.1 Hz, 3H), 1.01 (s, 6H), 0.95 (s, 6H); <sup>13</sup>C NMR (126 MHz, CDCl<sub>3</sub>) δ 177.08, 136.33, 128.44, 128.00, 127.95, 65.78, 54.62, 48.86, 44.16, 41.29, 17.81, 16.08; IR (neat) 2965, 2927, 1733, 1456, 1379, 1364, 1256, 1164, 696 cm<sup>-1</sup>; HRMS (DART) *m/z* Calcd for C<sub>20</sub>H<sub>32</sub>NO<sub>2</sub> (MH<sup>+</sup>): 318.2433; found: 318.2443.

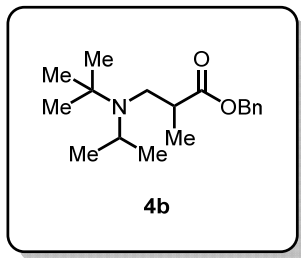

### Benzyl 3-(*tert*-butyl(isopropyl)amino)-2-methylpropanoate (**4b**)

*N*-Isopropyl-*N*,2-dimethylpropan-2-amine **1r** was reacted with benzyl acrylate **2c** (0.24 mmol, 1.2 equiv.) following the **General Procedure for B(C<sub>6</sub>F<sub>5</sub>)<sub>3</sub>-Catalyzed Racemic Mannich Reactions** using B(C<sub>6</sub>F<sub>5</sub>)<sub>3</sub> (10 mol%) as the Lewis acid catalyst, benzene (0.4 mL) as the solvent and was carried out for 12 h at 70 °C. After purification by column chromatography (hexanes: EtOAc = 5:1), **4b** was obtained as a colorless oil (49.4 mg, 85%).

<sup>1</sup>H NMR (500 MHz, Acetone-*d*<sub>6</sub>) δ 7.44 – 7.29 (m, 5H), 5.18 – 5.06 (m, 2H), 3.29 (hept, *J* = 6.8 Hz, 1H), 2.90 (dd, *J* = 14.3, 8.2 Hz, 1H), 2.65 (dp, *J* = 8.1, 6.8 Hz, 1H), 2.56 (dd, *J* = 14.3, 6.4 Hz, 1H), 1.09 (d, *J* = 6.9 Hz, 3H), 1.08 (s, 9H), 1.02 (d, *J* = 6.7 Hz, 3H), 0.97 (d, *J* = 6.8 Hz, 3H); <sup>13</sup>C NMR (126 MHz, Acetone-*d*<sub>6</sub>) δ 175.66, 136.88, 128.31, 127.85, 127.77, 65.17, 55.37, 46.88, 46.39, 42.76, 27.98, 22.16, 14.76; IR (neat) 2970, 2875, 1732, 1455, 1380, 1360, 1246, 1210, 1155, 748, 734 cm<sup>-1</sup>; HRMS (DART) *m/z* Calcd for C<sub>18</sub>H<sub>30</sub>NO<sub>2</sub> (MH<sup>+</sup>): 292.2277; found: 292.2281.

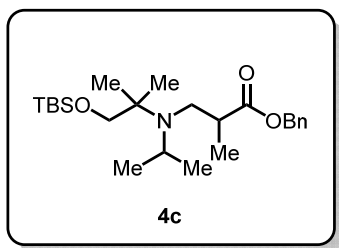

**Benzyl 3-((1-((*tert*-butyldimethylsilyloxy)-2-methylpropan-2-yl)(isopropyl)amino)-2-methylpropanoate (4c)**

1-((*tert*-Butyldimethylsilyloxy)-*N*-isopropyl-*N*,2-dimethylpropan-2-amine **1s** (0.2 mmol, 1.0 equiv.) was reacted with benzyl acrylate **2c** (0.24 mmol, 1.2 equiv.) following the **General Procedure for B(C<sub>6</sub>F<sub>5</sub>)<sub>3</sub>-Catalyzed Racemic Mannich Reactions** using B(C<sub>6</sub>F<sub>5</sub>)<sub>3</sub> (10 mol%) as the Lewis acid catalyst, benzene (0.2 mL) as the solvent and was carried out for 12 h at 22 °C.. After purification by column chromatography (hexanes: Et<sub>3</sub>N = 49:1), **4c** was obtained as a colorless oil (76.6 mg, 91%).

**<sup>1</sup>H NMR** (500 MHz, CDCl<sub>3</sub>) δ 7.37 – 7.26 (m, 5H), 5.14 – 5.05 (m, 2H), 3.39 – 3.33 (m, 2H), 3.25 (qd, *J* = 8.2, 7.5, 5.3 Hz, 1H), 3.04 – 2.97 (m, 1H), 2.70 – 2.59 (m, 2H), 1.09 (dt, *J* = 6.7, 1.6 Hz, 3H), 1.01 (d, *J* = 9.7 Hz, 9H), 0.95 (dt, *J* = 6.7, 1.5 Hz, 3H), 0.87 (t, *J* = 1.5 Hz, 9H); **<sup>13</sup>C NMR** (126 MHz, CDCl<sub>3</sub>) δ 176.71, 136.41, 128.41, 127.99, 127.91, 69.57, 65.71, 59.29, 47.35, 46.42, 42.93, 25.85, 24.32, 24.28, 18.17, 15.22, -5.57; **IR** (neat) 2956, 2929, 2856, 1734, 1461, 1250, 1156, 1085, 834, 773, 667 cm<sup>-1</sup>; **HRMS** (DART) *m/z* Calcd for C<sub>24</sub>H<sub>44</sub>NO<sub>3</sub>Si (MH<sup>+</sup>): 422.309; found: 422.3102.



1452, 1356, 1218, 1177, 751, 698  $\text{cm}^{-1}$ ; **HRMS** (DART)  $m/z$  Calcd for  $\text{C}_{27}\text{H}_{32}\text{NO}_2$  ( $\text{MH}^+$ ): 402.2433; found: 402.2442.

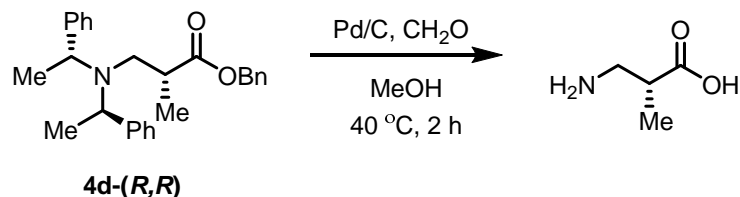

The minor diastereomer was obtained from 3 reactions following the General Procedure using  $\text{B}(\text{C}_6\text{F}_5)_3$  (10 mol%), DCM (0.6 mL) as the solvent and was carried out for 12 h at 70 °C on 0.6 mmol scale. The derivatization of the minor diastereomer was performed based on the literature previously reported.<sup>18</sup> The minor diastereomer (190 mg, 0.47 mmol) was dissolved in a solution of 4.4% formic acid in MeOH (9.4 mL), whereupon Pd-C (10 mol%, 162 mg) was added. The reaction mixture was then heated at 40 °C for 2 h. Upon cooling, the suspension was filtered through a pad of Celite and the mixture was concentrated to remove the solvent and volatile side products to obtain the product as a colorless oil (48 mg, >95% yield).  $[\alpha]_D^{25} = -4.8^\circ$  ( $c = 1.0$ ,  $\text{H}_2\text{O}$ ). Based on the observed optical rotation value, the absolute configuration of the minor diastereomer was assigned as **4d-(R,R)**.<sup>18</sup>

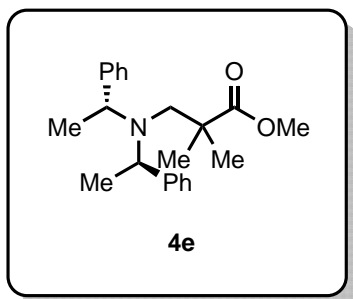

#### **Methyl 3-bis((R)-1-phenylethylamino)-2,2-dimethylpropanoate (4e)**

(*R*)-*N*-Methyl-1-phenyl-*N*-((*R*)-1-phenylethyl)ethan-1-amine **1t** (0.2 mmol, 1.0 equiv.) was reacted with methyl methacrylate **2g** (0.5 mmol, 2.5 equiv.) following the **General Procedure for  $\text{B}(\text{C}_6\text{F}_5)_3$ -Catalyzed Racemic Mannich Reactions** using  $\text{B}(\text{C}_6\text{F}_5)_3$  (10 mol%) as the Lewis acid catalyst, DCM (0.4 mL) as the solvent and was carried out for 12 h



at 70 °C. After purification by column chromatography (hexanes: Et<sub>2</sub>O = 50:1), **4e** was obtained as a colorless oil (64.2 mg, 95%).

**<sup>1</sup>H NMR** (500 MHz, CDCl<sub>3</sub>) δ 7.28 – 7.15 (m, 10H), 3.89 (q, *J* = 6.9 Hz, 2H), 3.57 (s, 3H), 3.17 (d, *J* = 14.0 Hz, 1H), 2.47 (d, *J* = 14.0 Hz, 1H), 1.43 (d, *J* = 6.9 Hz, 6H), 1.03 (s, 3H), 0.81 (s, 3H); **<sup>13</sup>C NMR** (126 MHz, CDCl<sub>3</sub>) δ 178.87, 144.42, 128.29, 127.70, 126.46, 55.57, 54.17, 51.58, 42.75, 26.08, 22.24, 14.80; **IR** (neat) 2970, 2932, 1732, 1493, 1452, 1178, 1148, 749, 698 cm<sup>-1</sup>; **HRMS** (DART) *m/z* Calcd for C<sub>22</sub>H<sub>30</sub>NO<sub>2</sub> (MH<sup>+</sup>): 340.2277; found: 340.2277.

**Table SI-8.** Evaluation of Trialkylamine Substrates

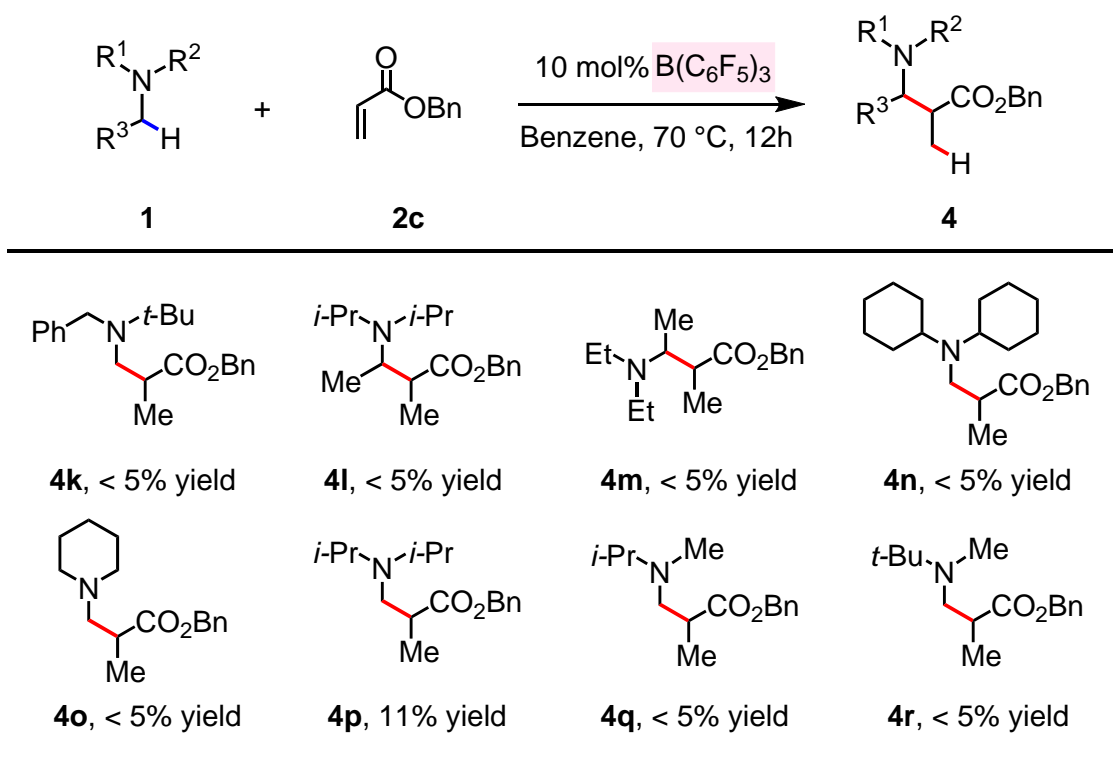

<sup>a</sup> Conditions: **1** (0.2 mmol), **2c** (0.24 mmol), benzene (0.4 mL), under N<sub>2</sub>, 70 °C, 12 h. <sup>b</sup> The yield was determined by <sup>1</sup>H NMR analysis of the unpurified product mixture using mesitylene as the internal standard.

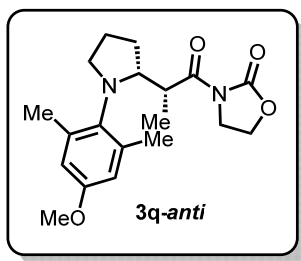

**3-(2-(1-(4-Methoxy-2,6-dimethylphenyl)pyrrolidin-2-yl)propanoyl)oxazolidin-2-one (3q)**  
 1-(4-Methoxy-2,6-dimethylphenyl)pyrrolidine **1a** was reacted with 3-acryloyloxazolidin-2-one **2q** following the **General Procedure for Stereoselective Mannich Reactions**. The  $^1\text{H}$  NMR analysis of the crude material revealed **3q** was obtained in >95% yield as a mixture of diastereomers; the ratio of **3q-anti** and **3q-syn** was determined to be 1.6:1.  $[\alpha]_D^{25} = -18.2^\circ$  ( $c = 1.0$ , EtOH). The absolute configuration of **3q-anti** was assigned in analogy (see SI Section 4).

$^1\text{H}$  NMR (600 MHz,  $\text{CDCl}_3$ )  $\delta$  6.55 (d,  $J = 2.9$  Hz, 1H), 6.49 (d,  $J = 3.0$  Hz, 1H), 4.20 (td,  $J = 9.0, 4.8$  Hz, 1H), 4.04 – 3.99 (m, 2H), 3.73 (s, 3H), 3.68 (dd,  $J = 8.0, 6.7$  Hz, 1H), 3.60 (dt,  $J = 10.5, 9.1$  Hz, 1H), 3.32 (q,  $J = 7.5$  Hz, 1H), 3.13 (ddd,  $J = 10.4, 9.2, 4.8$  Hz, 1H), 2.99 (td,  $J = 8.4, 4.6$  Hz, 1H), 2.27 (s, 3H), 2.22 (s, 3H), 2.14 – 2.08 (m, 1H), 2.01 – 1.94 (m, 1H), 1.93 – 1.86 (m, 1H), 1.77 – 1.71 (m, 1H), 1.12 (d,  $J = 6.9$  Hz, 3H);  $^{13}\text{C}$  NMR (151 MHz,  $\text{CDCl}_3$ )  $\delta$  176.38, 156.66, 152.99, 141.13, 140.81, 136.78, 113.74, 112.42, 62.76, 61.67, 55.16, 51.74, 42.88, 42.58, 30.84, 24.38, 19.40, 19.14, 15.56; IR (neat) 2962, 2837, 1775, 1695, 1601, 1478, 1384, 1267, 1221, 1194, 1154, 1066  $\text{cm}^{-1}$ ; HRMS (DART)  $m/z$  Calcd for  $\text{C}_{19}\text{H}_{27}\text{N}_2\text{O}_4$  ( $\text{MH}^+$ ): 347.1971; found: 347.1964. HPLC (Chiralpak IA; 10%/ 90% isopropanol/ hexanes, 1.0 mL/min; **3q-anti**:  $t_r = 6.8$  min (major), 6.2 min (minor); 80:20 er; **3q-syn**: 8.4 min (major), 7.6 min (minor) 68:32 er).

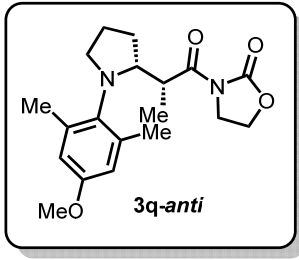

Acq. Operator : SYSTEM  
 Seq. Line : 2  
 Location : 11  
 Injection Date : 6/17/2017 6:58:53 PM  
 Inj : 1  
 Acq. Method : column1 10% IPA 90% hexane 60min-1.0mL.M  
 Analysis Method : C:\Chem32\1\Data\JOE 2017-06-17 18-41-04\column1 10% IPA 90% hexane 60min-1.0mL.M (Sequence Method)  
 Last changed : 6/17/2017 6:41:05 PM by SYSTEM  
 Method Info : Washing 60min-10% iPrOH 90% hexane-1.0mL

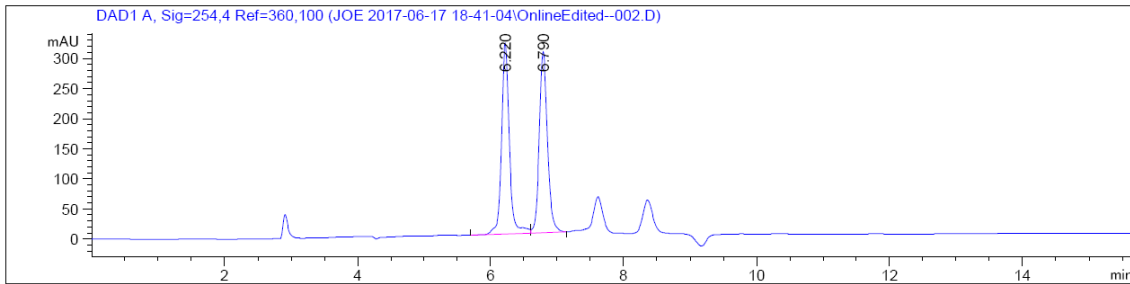

Signal 1: DAD1 A, Sig=254,4 Ref=360,100

| Peak # | RetTime [min] | Type | Width [min] | Area [mAU*s] | Height [mAU] | Area %  |
|--------|---------------|------|-------------|--------------|--------------|---------|
| 1      | 6.220         | BV R | 0.1227      | 2598.01807   | 317.40524    | 50.1526 |
| 2      | 6.790         | VB   | 0.1303      | 2582.20337   | 300.33380    | 49.8474 |







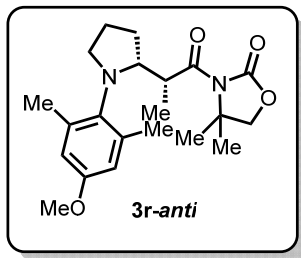

**3-(2-(1-(4-Methoxy-2,6-dimethylphenyl)pyrrolidin-2-yl)propanoyl)-4,4-dimethyloxazolidin-2-one (3r)**

1-(4-Methoxy-2,6-dimethylphenyl)pyrrolidine **1a** was reacted with 3-acryloyl-4,4-dimethyloxazolidin-2-one **2r** following the **General Procedure for Stereoselective Mannich Reactions**. The  $^1\text{H}$  NMR analysis of the crude material revealed **3r** was obtained in 88% yield as a mixture of diastereomers; the ratio of **3r-anti** and **3r-syn** was determined to be 4.3:1.  $[\alpha]_D^{25} = -31.1^\circ$  ( $c = 1.0$ , EtOH). The absolute configuration of **3r-anti** was assigned as described in SI Section 4.

$^1\text{H}$  NMR (500 MHz,  $\text{CDCl}_3$ )  $\delta$  6.53 – 6.50 (m, 2H), 4.02 (q,  $J = 6.7$  Hz, 1H), 3.84 (d,  $J = 8.3$  Hz, 1H), 3.74 (d,  $J = 8.4$  Hz, 1H), 3.73 – 3.71 (m, 4H), 3.30 (ddd,  $J = 8.4, 7.2, 5.6$  Hz, 1H), 2.97 (td,  $J = 7.9, 6.1$  Hz, 1H), 2.26 (s, 3H), 2.24 (s, 3H), 2.10 (dtd,  $J = 11.8, 7.0, 5.9$  Hz, 1H), 2.01 – 1.88 (m, 2H), 1.87 – 1.80 (m, 1H), 1.37 (s, 3H), 1.12 (d,  $J = 7.0$  Hz, 3H), 1.10 (s, 3H);  $^{13}\text{C}$  NMR (126 MHz,  $\text{CDCl}_3$ )  $\delta$  177.09, 156.68, 153.51, 140.56, 139.49, 137.55, 114.39, 112.82, 74.69, 61.81, 55.13, 53.97, 52.52, 44.23, 29.90, 25.05, 24.43, 24.13, 19.35, 14.97; IR (neat) 2963, 2836, 1773, 1698, 1602, 1481, 1376, 1303, 1176, 1154, 1071, 765  $\text{cm}^{-1}$ ; HRMS (DART)  $m/z$  Calcd for  $\text{C}_{21}\text{H}_{31}\text{N}_2\text{O}_4$  ( $\text{MH}^+$ ): 375.2284; found: 375.2292. HPLC (Chiralpak IC; 2.5%/ 97.5% isopropanol/ hexanes, 0.5 mL/min; **3r-anti**:  $t_r = 25.1$  min (major), 19.3 min (minor); 97:3 er; **3r-syn**: 22.1 min (major), 20.9 min (minor) 98:2 er).







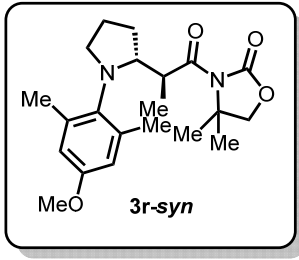

Acq. Operator : SYSTEM  
 Acq. Instrument : Wasa\_LC1  
 Injection Date : 8/7/2017 11:53:09 PM  
 Method : C:\Chem32\1\Data\JOE 2017-08-07 23-36-08\column1 2.5% IPA 97.5% hex 40min-0.5mL.M (Sequence Method)  
 Last changed : 8/7/2017 11:36:10 PM by SYSTEM  
 Method Info : Washing 40min-2.5% iPrOH 97.5% hexane-0.5mL

Seq. Line : 2  
 Location : 1  
 Inj : 1  
 Inj Volume : 4.000 µl

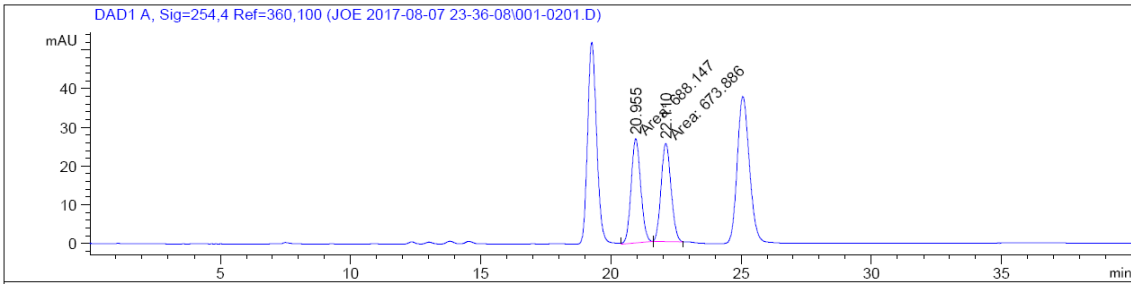

Signal 1: DAD1 A, Sig=254,4 Ref=360,100

| Peak # | RetTime [min] | Type | Width [min] | Area [mAU*s] | Height [mAU] | Area %  |
|--------|---------------|------|-------------|--------------|--------------|---------|
| 1      | 20.955        | MM   | 0.4269      | 688.14746    | 26.86458     | 50.5235 |
| 2      | 22.110        | MM   | 0.4435      | 673.88586    | 25.32295     | 49.4765 |



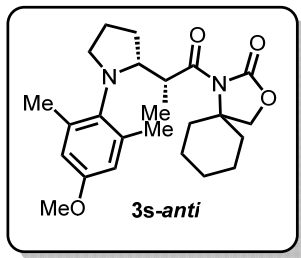

**1-(2-(1-(4-Methoxy-2,6-dimethylphenyl)pyrrolidin-2-yl)propanoyl)-3-oxa-1-azaspiro[4.5]decan-2-one (3s)**

1-(4-Methoxy-2,6-dimethylphenyl)pyrrolidine **1a** was reacted with 1-acryloyl-3-oxa-1-azaspiro[4.5]decan-2-one **2s** following the **General Procedure for Stereoselective Mannich Reactions**. The  $^1\text{H}$  NMR analysis of the crude material revealed **3s** was obtained in 79% yield as a mixture of diastereomers; the ratio of **3s-anti** and **3s-syn** was determined to be 5.6:1.  $[\alpha]_D^{25} = -47.5^\circ$  ( $c = 1.0$ , EtOH). The absolute configuration of **3s-anti** was assigned in analogy (see SI Section 4).

$^1\text{H}$  NMR (600 MHz,  $\text{CDCl}_3$ )  $\delta$  6.52 (t,  $J = 2.8$  Hz, 2H), 4.07 (d,  $J = 8.5$  Hz, 1H), 3.99 (q,  $J = 6.6$  Hz, 1H), 3.87 (dd,  $J = 8.5, 1.1$  Hz, 1H), 3.75 (t,  $J = 6.8$  Hz, 1H), 3.71 (s, 3H), 3.29 (td,  $J = 7.8, 5.5$  Hz, 1H), 2.97 (td,  $J = 8.0, 6.5$  Hz, 1H), 2.25 (s, 3H), 2.24 (s, 3H), 2.17 – 2.06 (m, 2H), 1.97 – 1.89 (m, 2H), 1.85 (ddd,  $J = 11.3, 7.4, 5.7$  Hz, 1H), 1.76 – 1.69 (m, 1H), 1.66 – 1.62 (m, 1H), 1.57 – 1.53 (m, 1H), 1.49 – 1.45 (m, 1H), 1.18 – 1.08 (m, 7H), 1.07 – 1.01 (m, 1H);  $^{13}\text{C}$  NMR (151 MHz,  $\text{CDCl}_3$ )  $\delta$  177.55, 156.67, 154.03, 140.52, 139.28, 137.62, 114.27, 112.91, 71.29, 63.87, 61.87, 55.08, 52.57, 44.34, 31.89, 31.21, 29.65, 25.16, 24.02, 22.86, 22.81, 19.39, 19.21, 14.79; IR (neat) 2929, 2860, 1771, 1698, 1602, 1482, 1456, 1375, 1318, 1262, 1224, 1157, 1071  $\text{cm}^{-1}$ ; HRMS (DART)  $m/z$  Calcd for  $\text{C}_{24}\text{H}_{35}\text{N}_2\text{O}_4$  ( $\text{MH}^+$ ): 415.2597; found: 415.2594. HPLC (Chiralcel IA; 2.5%/ 97.5% isopropanol/ hexanes, 0.5 mL/min; **3s-anti**:  $t_r = 12.6$  min (major), 14.7 min (minor); 95:5 er; **3s-syn**: 13.4 min (major), 16.9 min (minor) 98:2 er).



```

Acq. Operator   : SYSTEM                               Seq. Line :    2
Acq. Instrument : Wasa_LC1                             Location  :    1
Injection Date  : 7/31/2017 3:20:09 PM                Inj       :    1
                                                    Inj Volume: 4.000 µl
Method          : C:\Chem32\1\Data\JOE 2017-07-31 15-02-20\column1 2.5% IPA 97.5% hex 40min-0
                .5mL.M (Sequence Method)
Last changed    : 7/31/2017 3:02:21 PM by SYSTEM
Method Info     : Washing 40min-2.5% iPrOH 97.5% hexane-0.5mL

```

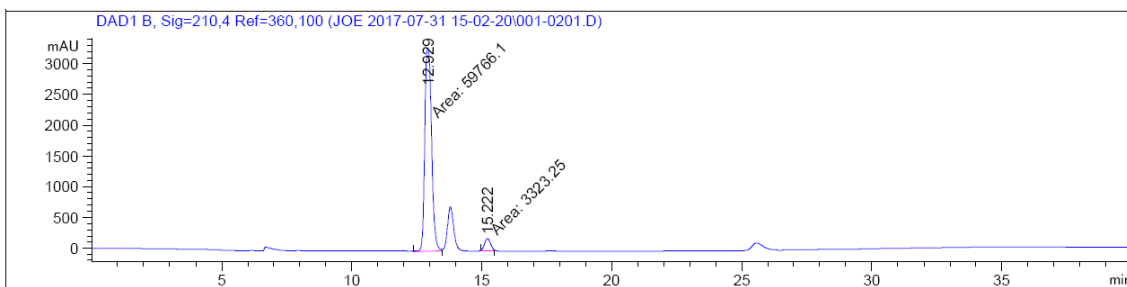

Signal 2: DAD1 B, Sig=210,4 Ref=360,100

| Peak # | RetTime [min] | Type | Width [min] | Area [mAU*s] | Height [mAU] | Area %  |
|--------|---------------|------|-------------|--------------|--------------|---------|
| 1      | 12.929        | MM   | 0.3012      | 5.97661e4    | 3306.89624   | 94.7325 |
| 2      | 15.222        | MM   | 0.2748      | 3323.25269   | 201.53804    | 5.2675  |







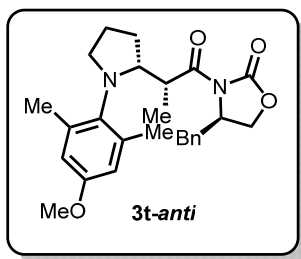

**(4*R*)-4-Benzyl-3-(2-(1-(4-methoxy-2,6-dimethylphenyl)pyrrolidin-2-yl)propanoyl)oxazolidin-2-one (3t)**

1-(4-Methoxy-2,6-dimethylphenyl)pyrrolidine **1a** was reacted with (*R*)-3-acryloyl-4-benzyloxazolidin-2-one **2t** following the **General Procedure for Stereoselective Mannich Reactions**. The  $^1\text{H}$  NMR analysis of the crude material revealed **3t** was obtained in 66% yield as a mixture of diastereomers; the ratio of diastereomers was determined to be 12:2:1:0. The absolute configuration of **3t-anti** was assigned in analogy (see SI Section 4).

$^1\text{H}$  NMR (500 MHz,  $\text{CDCl}_3$ )  $\delta$  7.32 – 7.22 (m, 3H), 7.10 – 7.04 (m, 2H), 6.50 (s, 2H), 4.05 (td,  $J = 8.2, 5.9$  Hz, 1H), 3.93 (dd,  $J = 8.3, 1.5$  Hz, 1H), 3.85 – 3.75 (m, 2H), 3.68 (s, 3H), 3.66 – 3.59 (m, 1H), 3.32 (q,  $J = 7.5$  Hz, 1H), 3.03 – 2.97 (m, 2H), 2.62 (dd,  $J = 13.5, 8.7$  Hz, 1H), 2.26 (s, 3H), 2.24 (s, 3H), 2.16 – 2.09 (m, 1H), 2.01 – 1.89 (m, 2H), 1.74 (dq,  $J = 11.0, 8.4$  Hz, 1H), 1.17 (d,  $J = 6.9$  Hz, 3H);  $^{13}\text{C}$  NMR (151 MHz,  $\text{CDCl}_3$ )  $\delta$  178.69, 159.38, 155.53, 143.80, 143.76, 139.38, 138.03, 131.99, 131.41, 129.81, 116.32, 115.15, 68.53, 65.16, 57.76, 54.24, 45.64, 40.32, 33.56, 27.05, 22.09, 21.82, 18.53; IR (neat) 2959, 2923, 2852, 1776, 1692, 1601, 1481, 1383, 1210, 1154, 1067, 703  $\text{cm}^{-1}$ ; HRMS (DART)  $m/z$  Calcd for  $\text{C}_{26}\text{H}_{33}\text{N}_2\text{O}_4$  ( $\text{MH}^+$ ): 437.244; found: 437.2436.

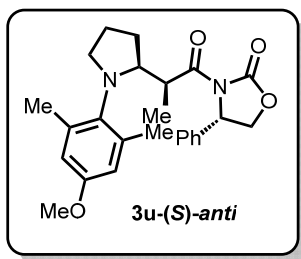

**(4S)-3-(2-(1-(4-Methoxy-2,6-dimethylphenyl)pyrrolidin-2-yl)propanoyl)-4-phenyloxazolidin-2-one (3u-(S))**

1-(4-Methoxy-2,6-dimethylphenyl)pyrrolidine **1a** was reacted with (*S*)-3-acryloyl-4-phenyloxazolidin-2-one **2u-(S)** following the **General Procedure for Stereoselective Mannich Reactions**. The  $^1\text{H}$  NMR analysis of the crude material revealed **3u-(S)** was obtained in 61% yield as a mixture of diastereomers; the ratio of diastereomers was determined to be 3.6:2.1:1:0. The absolute configuration of **3u(S)-anti** was assigned in analogy (see SI Section 4).

$^1\text{H}$  NMR (600 MHz,  $\text{CDCl}_3$ )  $\delta$  7.38 – 7.29 (m, 3H), 7.21 – 7.17 (m, 2H), 6.53 (s, 2H), 5.31 (dd,  $J = 8.8, 3.8$  Hz, 1H), 4.57 (t,  $J = 8.8$  Hz, 1H), 4.18 (dd,  $J = 8.9, 3.9$  Hz, 1H), 3.87 (dt,  $J = 7.1, 4.5$  Hz, 1H), 3.75 (s, 3H), 3.70 – 3.65 (m, 1H), 3.23 (ddd,  $J = 8.5, 6.9, 3.4$  Hz, 1H), 2.97 (q,  $J = 8.1$  Hz, 1H), 2.24 (s, 3H), 2.19 (s, 3H), 1.85 – 1.79 (m, 2H), 1.76 – 1.72 (m, 2H), 1.19 (d,  $J = 6.9$  Hz, 3H);  $^{13}\text{C}$  NMR (151 MHz,  $\text{CDCl}_3$ )  $\delta$  175.62, 156.54, 152.95, 140.31, 139.24, 138.23, 137.51, 129.04, 128.52, 125.95, 114.60, 113.01, 69.58, 61.75, 57.73, 55.04, 52.75, 42.76, 27.18, 25.66, 19.30, 19.25, 11.35; **IR** (neat) 2955, 2835, 1777, 1699, 1602, 1480, 1457, 1382, 1316, 1262, 1194, 1153, 699  $\text{cm}^{-1}$ ; **HRMS** (DART)  $m/z$  Calcd for  $\text{C}_{25}\text{H}_{31}\text{N}_2\text{O}_4$  ( $\text{MH}^+$ ): 423.2284; found: 423.2267.

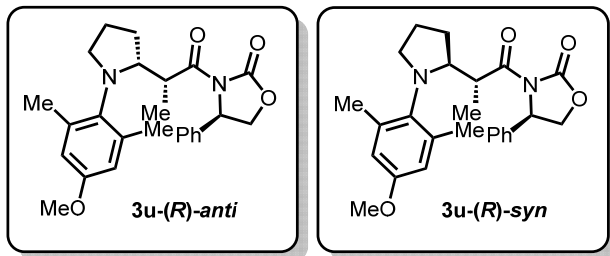

**(*R*)-3-((*R*)-2-((*R*)-1-(4-methoxy-2,6-dimethylphenyl)pyrrolidin-2-yl)propanoyl)-4-phenyloxazolidin-2-one (**3u-*R***)**

1-(4-Methoxy-2,6-dimethylphenyl)pyrrolidine **1a** was reacted with (*R*)-3-acryloyl-4-phenyloxazolidin-2-one **2u-*R*** following the **General Procedure for Stereoselective Mannich Reactions**. The  $^1\text{H}$  NMR analysis of the crude material revealed **3u-*R*** was obtained in >95% yield as a mixture of diastereomers; the ratio of **3u-*R*-anti** and **3u-*R*-syn** was determined to be 87:13.  $[\alpha]_D^{25} = -160.8^\circ$  ( $c = 1.0$ , EtOH). The absolute configurations of **3u-*R*-anti** and **3u-*R*-syn** were assigned as described in SI Section 4.

**3u-*R*-anti:**  $^1\text{H}$  NMR (600 MHz,  $\text{CDCl}_3$ )  $\delta$  7.29 (t,  $J = 7.4$  Hz, 2H), 7.26 – 7.23 (m, 1H), 7.06 (d,  $J = 7.5$  Hz, 2H), 6.60 (d,  $J = 3.0$  Hz, 1H), 6.54 (d,  $J = 3.0$  Hz, 1H), 4.56 (dd,  $J = 8.4$ , 2.4 Hz, 1H), 4.27 (t,  $J = 8.4$  Hz, 1H), 4.03 – 3.94 (m, 2H), 3.77 (s, 3H), 3.71 (q,  $J = 7.3$  Hz, 1H), 3.33 (q,  $J = 7.5$  Hz, 1H), 3.01 (td,  $J = 8.4$ , 4.6 Hz, 1H), 2.31 (s, 3H), 2.21 (s, 3H), 2.13 – 2.04 (m, 1H), 2.10 – 2.05 (m, 1H), 1.92 – 1.86 (m, 1H), 1.74 – 1.68 (m, 1H), 1.07 (d,  $J = 6.9$  Hz, 3H);  $^{13}\text{C}$  NMR (151 MHz,  $\text{CDCl}_3$ )  $\delta$  175.18, 156.76, 153.16, 141.34, 141.23, 139.54, 136.71, 128.97, 128.20, 125.13, 113.83, 112.42, 69.76, 62.38, 57.37, 55.24, 51.45, 42.74, 30.73, 24.36, 19.38, 19.21, 15.57; **IR** (neat) 2962, 2836, 1776, 1698, 1600, 1479, 1456, 1380, 1193, 1153, 699  $\text{cm}^{-1}$ ; **HRMS** (DART)  $m/z$  Calcd for  $\text{C}_{25}\text{H}_{31}\text{N}_2\text{O}_4$  ( $\text{MH}^+$ ): 423.2284; found: 423.2282.

**3u-*R*-syn:**  $^1\text{H}$  NMR (600 MHz,  $\text{CDCl}_3$ )  $\delta$  7.33 – 7.29 (m, 2H), 7.28 – 7.24 (m, 1H), 7.16 – 7.12 (m, 2H), 6.59 (d,  $J = 3.1$  Hz, 1H), 6.54 (d,  $J = 3.1$  Hz, 1H), 4.70 (dd,  $J = 8.4$ , 2.9 Hz, 1H), 4.37 (t,  $J = 8.5$  Hz, 1H), 4.13 – 4.03 (m, 2H), 3.81 – 3.70 (m, 4H), 3.35 – 3.26 (m, 1H), 2.95 – 2.85 (m, 1H), 2.31 (s, 3H), 2.28 – 2.19 (m, 4H), 2.03 – 1.94 (m, 1H), 1.91 – 1.85 (m, 1H), 1.84 – 1.80 (m, 1H), 1.00 (d,  $J = 6.8$  Hz, 3H);  $^{13}\text{C}$  NMR (126 MHz,  $\text{CDCl}_3$ )  $\delta$  174.96, 156.36,

153.47, 140.71, 139.45, 139.38, 136.97, 128.99, 128.37, 125.50, 114.38, 113.01, 69.99, 62.52, 57.85, 55.21, 53.64, 44.56, 30.93, 25.25, 19.37, 19.31, 12.56; **IR** (neat) 2957, 2835, 1774, 1701, 1602, 1479, 1457, 1380, 1317, 1193, 1042, 698  $\text{cm}^{-1}$ ; **HRMS** (DART)  $m/z$  Calcd for  $\text{C}_{25}\text{H}_{31}\text{N}_2\text{O}_4$  ( $\text{MH}^+$ ): 423.2284; found: 423.2291.

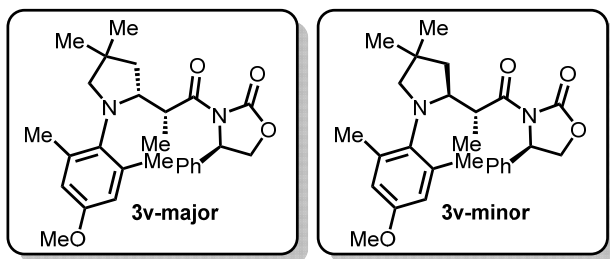

**(4*R*)-3-(2-(1-(4-Methoxy-2,6-dimethylphenyl)-4,4-dimethylpyrrolidin-2-yl)propanoyl)-4-phenyloxazolidin-2-one (3v)**

1-(4-Methoxy-2,6-dimethylphenyl)-3,3-dimethylpyrrolidine **11** was reacted with (*R*)-3-acryloyl-4-phenyloxazolidin-2-one **2u-(*R*)** following the **General Procedure for Stereoselective Mannich Reactions**. <sup>1</sup>H NMR analysis of the crude material revealed that **3v-major** and **3v-minor** were obtained in the ratio of 58:17:0:0. After purification by column chromatography (hexanes: Et<sub>2</sub>O = 17:3 then 15:5), **3v-major** (52 mg, 58%) and **3v-minor** (15 mg, 17%) were obtained as single diastereomers. The absolute configurations of **3v-major** and **3v-minor** were assigned in analogy, see SI Section 4.

**3v-major:** <sup>1</sup>H NMR (500 MHz, CDCl<sub>3</sub>) δ7.34 – 7.20 (m, 3H), 7.08 – 7.02 (m, 2H), 6.60 (d, *J* = 3.0 Hz, 1H), 6.53 (d, *J* = 3.0 Hz, 1H), 4.45 (dd, *J* = 8.4, 2.2 Hz, 1H), 4.23 – 4.11 (m, 2H), 4.01 – 3.93 (m, 1H), 3.81 – 3.71 (m, 4H), 3.17 (d, *J* = 7.9 Hz, 1H), 2.80 (d, *J* = 7.9 Hz, 1H), 2.33 (s, 3H), 2.24 (s, 3H), 1.78 (dd, *J* = 11.6, 5.5 Hz, 1H), 1.56 (dd, *J* = 11.7, 9.7 Hz, 1H), 1.19 (s, 3H), 1.17 (s, 3H), 1.00 (d, *J* = 6.9 Hz, 3H); <sup>13</sup>C NMR (126 MHz, CDCl<sub>3</sub>) δ175.02, 156.78, 153.15, 142.50, 141.45, 139.61, 135.71, 128.95, 128.18, 125.13, 113.69, 112.45, 69.74, 65.06, 61.89, 57.39, 55.29, 46.19, 42.64, 36.69, 29.22, 28.41, 19.65, 19.32, 16.14; IR (neat) 2953, 2863, 2836, 1780, 1698, 1600, 1481, 1380, 1196, 1154, 702 cm<sup>-1</sup>; HRMS (DART) *m/z* Calcd for C<sub>27</sub>H<sub>35</sub>N<sub>2</sub>O<sub>4</sub> (MH<sup>+</sup>): 451.2597; found: 451.2612; [α]<sub>D</sub><sup>25</sup> = -152.7° (c = 1.0, EtOH).

**3v-minor:** <sup>1</sup>H NMR (500 MHz, CDCl<sub>3</sub>) δ7.41 – 7.30 (m, 3H), 7.16 – 7.11 (m, 2H), 6.48 (d, *J* = 3.1 Hz, 1H), 6.40 (d, *J* = 3.0 Hz, 1H), 5.27 (dd, *J* = 8.8, 4.0 Hz, 1H), 4.57 (t, *J* = 8.8 Hz, 1H), 4.18 (ddd, *J* = 12.5, 8.8, 5.2 Hz, 2H), 3.81 (t, *J* = 6.6 Hz, 1H), 3.73 (s, 3H), 3.03 (d, *J* = 8.4 Hz, 1H), 2.76 (d, *J* = 8.4 Hz, 1H), 2.25 (s, 6H), 1.50 (dd, *J* = 12.3, 8.6 Hz, 1H), 1.24 –

1.18 (m, 1H), 1.12 (s, 3H), 1.05 (s, 3H), 1.01 (d,  $J = 6.9$  Hz, 3H);  $^{13}\text{C}$  NMR (151 MHz,  $\text{CDCl}_3$ )  $\delta$ 175.64, 156.34, 153.13, 139.35, 139.04, 139.01, 135.49, 129.03, 128.49, 126.08, 114.39, 113.25, 69.63, 65.92, 60.12, 57.85, 54.98, 42.68, 41.06, 36.01, 29.47, 28.77, 19.71, 19.35, 12.66; **IR** (neat) 2952, 2920, 2850, 1779, 1702, 1481, 1381, 1319, 1193, 1067, 700  $\text{cm}^{-1}$ ; **HRMS** (DART)  $m/z$  Calcd for  $\text{C}_{27}\text{H}_{35}\text{N}_2\text{O}_4$  ( $\text{MH}^+$ ): 451.2597; found: 451.2613.

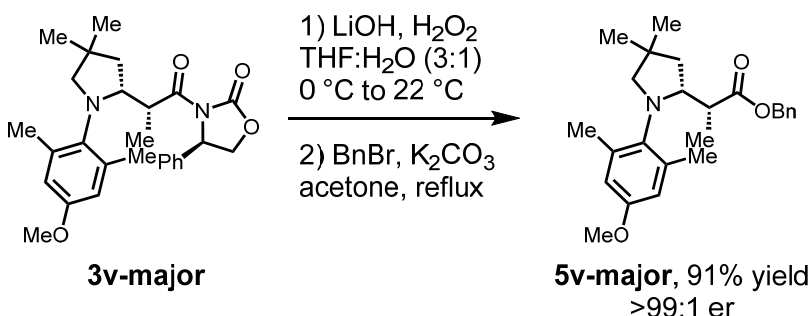

**3v-major** was transformed into the corresponding benzyl ester **5v-major** following previously reported literatures.<sup>19,20</sup>

**(R)-2-((R)-1-(4-Methoxy-2,6-dimethylphenyl)-4,4-dimethylpyrrolidin-2-yl)propanoic acid**

(*R*)-2-((*R*)-1-(4-Methoxy-2,6-dimethylphenyl)-4,4-dimethylpyrrolidin-2-yl)propanoic acid was prepared by following a known procedure.<sup>19</sup> To a solution of Mannich product **3v-major** (90 mg, 0.2 mmol) in THF:H<sub>2</sub>O (3:1, 2.4 mL) at 0 °C was added H<sub>2</sub>O<sub>2</sub> (30% v/v, 0.02 mL, 0.8 mmol) and 2 M LiOH (0.14 mL, 0.28 mmol), dropwise. The mixture was stirred at 22 °C for 5 h, whereupon the reaction was quenched with NaHSO<sub>3</sub>. The crude mixture was then concentrated *in vacuo*, then diluted with EtOAc (2 mL), H<sub>2</sub>O (2 mL), and 1 M NaOH (2 mL). The organic layer was separated and the aqueous layer was extracted with EtOAc (3 x 5 mL). Subsequently, the aqueous layer was acidified with 6 M HCl (2 mL) and extracted with EtOAc (3 x 5 mL). The combined organic layers were washed with brine (10 mL), dried (MgSO<sub>4</sub>), filtered, and concentrated *in vacuo* to afford (*R*)-2-((*R*)-1-(4-Methoxy-2,6-dimethylphenyl)-4,4-dimethylpyrrolidin-2-yl)propanoic acid as a yellow solid (60 mg, 98%) which was used without further purification.

**Benzyl (R)-2-((R)-1-(4-methoxy-2,6-dimethylphenyl)-4,4-dimethylpyrrolidin-2-yl)propanoate (5v-major)**

Benzyl (R)-2-((R)-1-(4-methoxy-2,6-dimethylphenyl)-4,4-dimethylpyrrolidin-2-yl)propanoate was prepared by following a known procedure.<sup>20</sup> Benzyl bromide (0.12 mL, 1.0 mmol) was added dropwise to a mixture of (R)-2-((R)-1-(4-Methoxy-2,6-dimethylphenyl)-4,4-dimethylpyrrolidin-2-yl)propanoic acid (61 mg, 0.2 mmol) and K<sub>2</sub>CO<sub>3</sub> (28 mg, 0.2 mmol) in acetone (1.0 mL). The reaction mixture was heated at reflux for 12 h. The reaction mixture was filtered through a pad of celite and the solvent was evaporated by rotary evaporation. The crude product was purified by silica gel column chromatography (19:1 Hexanes: Et<sub>2</sub>O) to afford **5v-major** as a colorless oil (74 mg, 93% yield).

<sup>1</sup>H NMR (500 MHz, CDCl<sub>3</sub>) δ 7.31 (qd, *J* = 7.7, 4.0 Hz, 3H), 7.20 (d, *J* = 7.2 Hz, 2H), 6.51 (d, *J* = 3.0 Hz, 1H), 6.47 (d, *J* = 3.1 Hz, 1H), 4.61 – 4.38 (m, 2H), 4.10 (q, *J* = 7.6 Hz, 1H), 3.70 (s, 3H), 3.12 – 3.02 (m, 1H), 2.87 – 2.77 (m, 1H), 2.48 – 2.38 (m, 1H), 2.29 (s, 3H), 2.27 (s, 3H), 1.82 – 1.75 (m, 1H), 1.52 (dd, *J* = 12.2, 8.1 Hz, 1H), 1.21 – 1.18 (m, 3H), 1.14 (d, *J* = 1.3 Hz, 3H), 1.05 (dd, *J* = 7.0, 1.4 Hz, 3H); <sup>13</sup>C NMR (151 MHz, CDCl<sub>3</sub>) δ 175.54, 156.49, 140.47, 139.41, 136.16, 135.67, 128.28, 127.80, 127.75, 114.24, 113.04, 65.96, 65.69, 61.86, 55.10, 45.25, 44.63, 36.32, 29.44, 28.59, 19.73, 19.52, 14.66; **HPLC** (Chiralpak AD-H; 1%/99% isopropanol/ hexanes, 0.5 mL/min; **5v-major**: tr = 11.4 min (minor), 12.1 min (major); >99:1 er.

```
Acq. Operator   : SYSTEM                               Seq. Line :    2
Acq. Instrument : Wasa_LC1                             Location  :    1
Injection Date  : 1/9/2018 6:20:24 PM                 Inj       :    1
                                                    Inj Volume: 4.000 µl
Method          : C:\Chem32\1\Data\JOE 2018-01-09 17-17-31\column1 1% IPA 99% hex 20min-0.5mL
                  .M (Sequence Method)
Last changed    : 1/9/2018 5:17:33 PM by SYSTEM
Method Info     : Column 1 20min-1% iPrOH 99% hexane-0.5mL
```

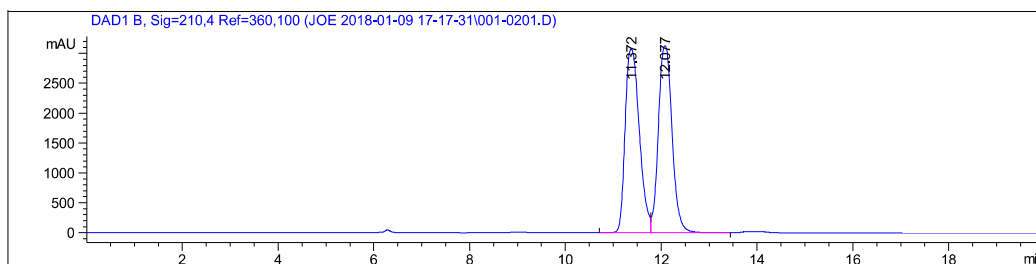





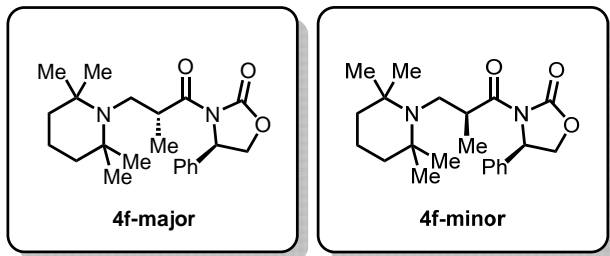

**(4R)-3-(2-Methyl-3-(2,2,6,6-tetramethylpiperidin-1-yl)propanoyl)-4-phenyloxazolidin-2-one (4f)**

1,2,2,6,6-Pentamethylpiperidine **1q** was reacted with (*R*)-3-acryloyl-4-phenyloxazolidin-2-one **2u-(R)** following the **General Procedure for Stereoselective Mannich Reactions** at 50 °C. <sup>1</sup>H NMR analysis of the crude material revealed that **4f-major** and **4f-minor** were obtained in the ratio of 2.0:1. After purification by PTLC (hexanes: EtOAc: Et<sub>3</sub>N = 16:4:1), **4f-major** (35 mg, 47%) and **4f-minor** (28 mg, 24%) were obtained as single diastereomers.

**4f-major:** <sup>1</sup>H NMR (500 MHz, CDCl<sub>3</sub>) δ7.37 (t, *J* = 7.0 Hz, 2H), 7.33 (d, *J* = 6.8 Hz, 1H), 7.29 – 7.25 (m, 2H), 5.44 – 5.36 (m, 1H), 4.69 – 4.60 (m, 1H), 4.23 (ddd, *J* = 8.9, 3.4, 1.6 Hz, 1H), 4.03 (p, *J* = 6.8 Hz, 1H), 2.95 (dd, *J* = 15.5, 6.5 Hz, 1H), 2.49 (dd, *J* = 15.5, 5.8 Hz, 1H), 1.51 (d, *J* = 5.9 Hz, 2H), 1.39 (dd, *J* = 8.5, 4.6 Hz, 4H), 1.10 (d, *J* = 7.1 Hz, 3H), 1.03 (s, 6H), 0.97 (s, 6H); <sup>13</sup>C NMR (126 MHz, CDCl<sub>3</sub>) δ177.60, 153.26, 139.37, 129.12, 128.51, 125.60, 69.57, 57.82, 54.61, 47.77, 41.38, 41.26, 17.81, 16.41; **IR** (neat) 2963, 2926, 1780, 1699, 1381, 1320, 1242, 1197, 1042, 761 cm<sup>-1</sup>; **HRMS** (DART) *m/z* Calcd for C<sub>22</sub>H<sub>33</sub>N<sub>2</sub>O<sub>3</sub> (MH<sup>+</sup>): 373.2491; found: 373.2504; [α]<sub>D</sub><sup>25</sup> = -107.9° (c = 0.3, EtOH).

**4f-minor:** <sup>1</sup>H NMR (500 MHz, CDCl<sub>3</sub>) δ7.40 – 7.30 (m, 5H), 5.45 (dd, *J* = 8.9, 4.0 Hz, 1H), 4.67 (dd, *J* = 9.6, 8.2 Hz, 1H), 4.31 – 4.24 (m, 1H), 3.97 (q, *J* = 6.8 Hz, 1H), 2.90 (dd, *J* = 15.4, 6.3 Hz, 1H), 2.37 (dd, *J* = 15.4, 6.3 Hz, 1H), 1.47 (s, 2H), 1.32 (t, *J* = 6.0 Hz, 4H), 1.16 (dd, *J* = 7.1, 1.3 Hz, 3H), 0.96 (s, 6H), 0.78 (s, 6H); <sup>13</sup>C NMR (151 MHz, CDCl<sub>3</sub>) δ177.67, 153.35, 139.33, 129.03, 128.59, 126.34, 69.52, 57.88, 54.57, 47.48, 41.59, 41.35, 17.82, 16.43; **IR** (neat) 2964, 2925, 2872, 1777, 1700, 1457, 1380, 1319, 1196, 1044, 949, 699 cm<sup>-1</sup>; **HRMS** (DART) *m/z* Calcd for C<sub>22</sub>H<sub>33</sub>N<sub>2</sub>O<sub>3</sub> (MH<sup>+</sup>): 373.2491; found: 373.2474.

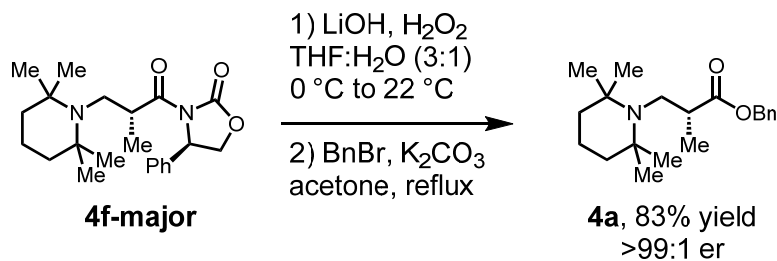

**4f-major** was transformed into the corresponding benzyl ester **4a** following previously reported literatures.<sup>19,20</sup> **HPLC** (Chiralcel OD-H; 2.5%/ 97.5% isopropanol/ hexanes, 0.3 mL/min; **4a**: tr = 12.6 min (major), 13.3 min (minor); >99:1 er.

```

Acq. Operator   : SYSTEM                               Seq. Line :    3
Acq. Instrument : Wasa_LC1                             Location  :   51
Injection Date  : 1/24/2018 1:20:46 PM                 Inj       :    1
                                                    Inj Volume: 4.000 µl
Method          : C:\Chem32\1\Data\JOE 2018-01-24 11-57-03\column1 2.5%IPA 97.5% hexane 40min
                  -0.3mL.M (Sequence Method)
Last changed    : 1/24/2018 11:57:04 AM by SYSTEM
Method Info     : Column1 40min-2.5% iPrOH 97.5% hexane-0.3mL
  
```

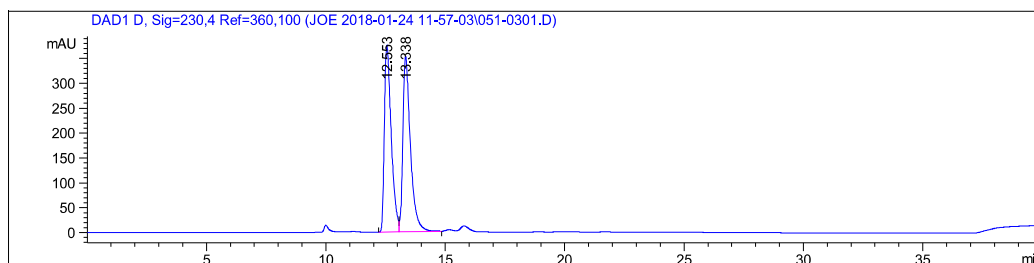

Signal 4: DAD1 D, Sig=230,4 Ref=360,100

| Peak # | RetTime [min] | Type | Width [min] | Area [mAU*s] | Height [mAU] | Area %  |
|--------|---------------|------|-------------|--------------|--------------|---------|
| 1      | 12.553        | BV   | 0.2982      | 7523.91992   | 374.85226    | 49.2105 |
| 2      | 13.338        | VB   | 0.3294      | 7765.33203   | 351.95917    | 50.7895 |



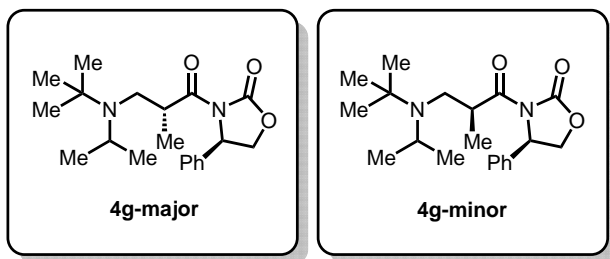

**(4R)-3-(3-(*tert*-Butyl(isopropyl)amino)-2-methylpropanoyl)-4-phenyloxazolidin-2-one**  
**(4g)**

*N*-Isopropyl-*N*,2-dimethylpropan-2-amine **1r** was reacted with (*R*)-3-acryloyl-4-phenyloxazolidin-2-one **2u-(R)** following the **General Procedure for Stereoselective Mannich Reactions**. <sup>1</sup>H NMR analysis of the crude material revealed that **4g-major** and **4g-minor** were obtained in the ratio of 1.8:1. After purification by PTLC (hexanes: EtOAc: Et<sub>3</sub>N = 16:4:1), **4g-major** (35 mg, 50%) and **4g-minor** (14 mg, 20%) were obtained as single diastereomers.

**4g-major:** <sup>1</sup>H NMR (500 MHz, CDCl<sub>3</sub>) δ 7.37 (dd, *J* = 8.1, 6.5 Hz, 2H), 7.33 (d, *J* = 7.3 Hz, 1H), 7.28 (dd, *J* = 7.0, 1.8 Hz, 2H), 5.42 (dd, *J* = 8.5, 3.3 Hz, 1H), 4.65 (t, *J* = 8.7 Hz, 1H), 4.23 (dd, *J* = 8.8, 3.3 Hz, 1H), 4.02 (q, *J* = 6.9 Hz, 1H), 3.23 (p, *J* = 6.7 Hz, 1H), 2.92 (dd, *J* = 14.6, 7.4 Hz, 1H), 2.51 (dd, *J* = 14.6, 6.5 Hz, 1H), 1.07 (d, *J* = 5.5 Hz, 12H), 0.99 (d, *J* = 6.7 Hz, 3H), 0.97 (d, *J* = 6.7 Hz, 3H); <sup>13</sup>C NMR (151 MHz, CDCl<sub>3</sub>) δ 177.22, 153.39, 139.43, 129.14, 128.50, 125.58, 69.66, 57.75, 55.75, 46.54, 46.26, 40.01, 28.46, 23.14, 22.32, 15.54; **IR** (neat) 2965, 2924, 2854, 1761, 1701, 1384, 1197, 1078, 699 cm<sup>-1</sup>; **HRMS** (DART) *m/z* Calcd for C<sub>20</sub>H<sub>31</sub>N<sub>2</sub>O<sub>3</sub> (MH<sup>+</sup>): 347.2335; found: 347.232; [α]<sub>D</sub><sup>25</sup> = -80.2° (c = 0.5, EtOH).

**4g-minor:** <sup>1</sup>H NMR (500 MHz, CDCl<sub>3</sub>) δ 7.40 – 7.30 (m, 5H), 5.46 (dd, *J* = 8.9, 4.3 Hz, 1H), 4.72 – 4.63 (m, 1H), 4.30 – 4.20 (m, 1H), 4.01 (q, *J* = 7.0 Hz, 1H), 3.20 – 3.11 (m, 1H), 3.00 – 2.87 (m, 1H), 2.39 (dd, *J* = 14.3, 6.3 Hz, 1H), 1.11 (dd, *J* = 6.9, 1.4 Hz, 3H), 1.00 – 0.97 (m, 3H), 0.95 (s, 9H), 0.83 (d, *J* = 6.7 Hz, 3H); <sup>13</sup>C NMR (126 MHz, CDCl<sub>3</sub>) δ 177.24, 153.51, 139.27, 128.97, 128.49, 126.28, 69.54, 57.83, 55.66, 46.57, 46.47, 40.03, 28.36, 23.48, 21.94, 15.52; **IR** (neat) 2969, 2928, 2873, 1776, 1703, 1457, 1383, 1320, 1198, 1043, 698 cm<sup>-1</sup>; **HRMS** (DART) *m/z* Calcd for C<sub>20</sub>H<sub>31</sub>N<sub>2</sub>O<sub>3</sub> (MH<sup>+</sup>): 347.2335; found: 347.235.

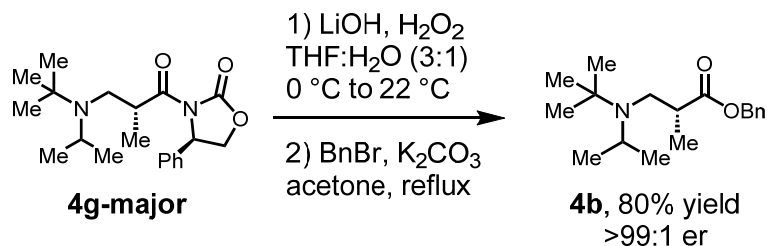

**4g-major** was transformed into the corresponding benzyl ester **4b** following previously reported literatures.<sup>19,20</sup> **HPLC** (Chiralcel OD-H; 0.5%/ 99.5% isopropanol/ hexanes, 1.0 mL/min; **4b**: tr = 7.9 min (major), 8.5 min (minor); >99:1 er.

```

Acq. Operator   : SYSTEM                               Seq. Line :    2
Acq. Instrument : Wasa_LC1                             Location  :   41
Injection Date  : 1/22/2018 8:13:40 PM                 Inj       :    1
                                                    Inj Volume: 4.000 µl
Acq. Method     : C:\Chem32\1\Data\JOE 2018-01-22 19-11-39\column1 1% IPA 99% hex 60min-0.5mL
                                                         .M
  
```

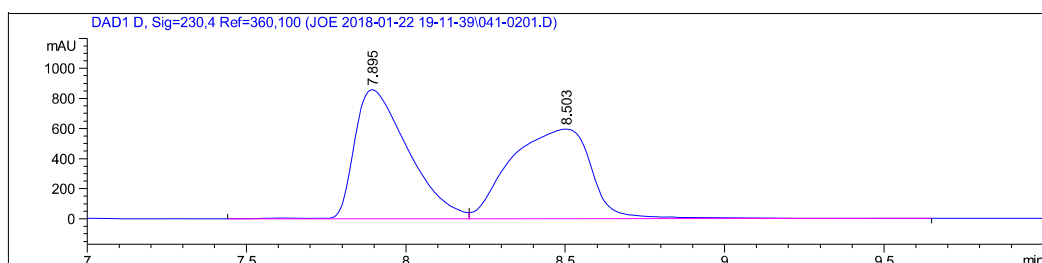

Signal 4: DAD1 D, Sig=230,4 Ref=360,100

| Peak # | RetTime [min] | Type | Width [min] | Area [mAU*s] | Height [mAU] | Area %  |
|--------|---------------|------|-------------|--------------|--------------|---------|
| 1      | 7.895         | VV R | 0.1798      | 1.00079e4    | 856.65320    | 48.9703 |
| 2      | 8.503         | VB   | 0.2983      | 1.04288e4    | 595.46783    | 51.0297 |



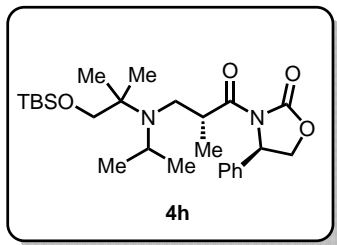

**(4R)-3-(3-((1-((*tert*-Butyldimethylsilyl)oxy)-2-methylpropan-2-yl)(isopropyl)amino)-2-methylpropanoyl)-4-phenyloxazolidin-2-one (4h)**

1-((*tert*-Butyldimethylsilyl)oxy)-*N*-ethyl-*N*-isopropyl-2-methylpropan-2-amine **1s** was reacted with (*R*)-3-acryloyl-4-phenyloxazolidin-2-one **2u-(R)** following the **General Procedure for Stereoselective Mannich Reactions**. <sup>1</sup>H NMR analysis of the crude material revealed that **4h-major** and **4h-minor** were obtained in the ratio of 7.4:1. After purification by silica gel column chromatography (hexanes: Et<sub>3</sub>N = 50:1 then 19:1), **4h-major** (71 mg, 70%) and **4h-minor** (9 mg, 10%) were obtained as single diastereomers.

**4h-major:** <sup>1</sup>H NMR (600 MHz, CDCl<sub>3</sub>) δ 7.37 (dd, *J* = 8.2, 6.7 Hz, 2H), 7.33 (d, *J* = 7.1 Hz, 1H), 7.29 – 7.27 (m, 2H), 5.42 (dd, *J* = 8.5, 3.2 Hz, 1H), 4.64 (t, *J* = 8.7 Hz, 1H), 4.23 (dd, *J* = 8.8, 3.3 Hz, 1H), 3.99 (h, *J* = 7.0 Hz, 1H), 3.43 – 3.34 (m, 2H), 3.27 (p, *J* = 6.7 Hz, 1H), 3.03 (dd, *J* = 14.8, 7.3 Hz, 1H), 2.68 (dd, *J* = 14.8, 6.6 Hz, 1H), 1.06 (d, *J* = 7.2 Hz, 9H), 1.01 (d, *J* = 6.7 Hz, 3H), 0.98 (d, *J* = 6.7 Hz, 3H), 0.89 (s, 9H), 0.02 (d, *J* = 1.3 Hz, 6H); <sup>13</sup>C NMR (151 MHz, CDCl<sub>3</sub>) δ 179.81, 156.03, 142.11, 131.81, 131.17, 128.25, 72.31, 72.21, 62.06, 60.42, 49.16, 49.04, 42.75, 28.52, 26.84, 26.81, 20.84, 18.14, -2.91; **IR** (neat) 2956, 2925, 2854, 1781, 1702, 1459, 1381, 1195, 1086, 1044, 836, 774 cm<sup>-1</sup>; **HRMS** (DART) *m/z* Calcd for C<sub>26</sub>H<sub>45</sub>N<sub>2</sub>O<sub>4</sub>Si (MH<sup>+</sup>): 477.3147; found: 477.3171; [α]<sub>D</sub><sup>25</sup> = -60.9° (c = 0.8, EtOH).

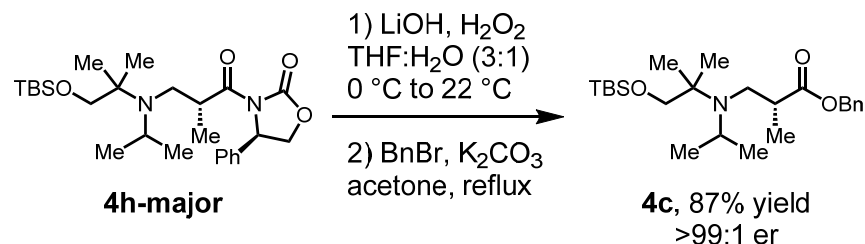

**4h-major** was transformed into the corresponding benzyl ester **4c** following previously reported literatures.<sup>19,20</sup> **HPLC** (Chiralcel OD-H; 0.5%/ 99.5% isopropanol/ hexanes, 1.0 mL/min; **4c**: tr = 8.5 min (minor), 9.6 min (major); >99:1 er.

```

Acq. Operator   : SYSTEM                               Seq. Line :    3
Acq. Instrument : Wasa_LC1                             Location  :   31
Injection Date  : 1/22/2018 4:55:37 PM                 Inj       :    1
                                                    Inj Volume: 4.000 µl
Method          : C:\Chem32\1\Data\JOE 2018-01-22 15-32-04\column1 0.5% IPA 99.5% hex 40min-1
                  .0mL.M (Sequence Method)
Last changed    : 1/22/2018 3:32:06 PM by SYSTEM
Method Info     : Column1 40min-0.5% iPrOH 99.5% hexane-1.0mL
  
```

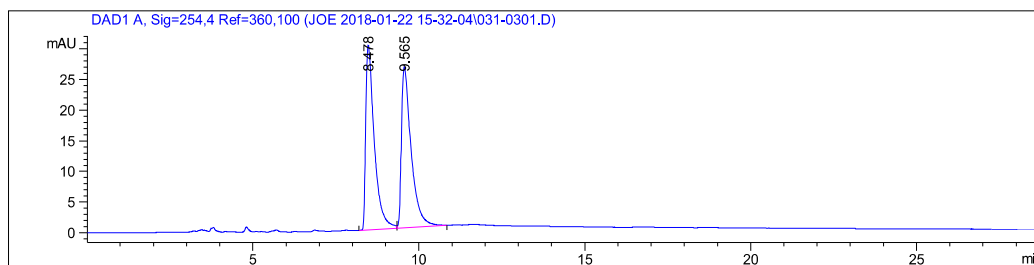

Signal 1: DAD1 A, Sig=254,4 Ref=360,100

| Peak # | RetTime [min] | Type | Width [min] | Area [mAU*s] | Height [mAU] | Area %  |
|--------|---------------|------|-------------|--------------|--------------|---------|
| 1      | 8.478         | BV   | 0.2633      | 540.04773    | 30.10438     | 50.2350 |
| 2      | 9.565         | VB   | 0.3001      | 534.99445    | 26.21741     | 49.7650 |





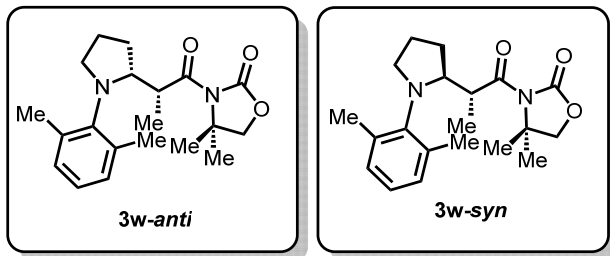

**3-(2-(1-(2,6-dimethylphenyl)pyrrolidin-2-yl)propanoyl)-4,4-dimethyloxazolidin-2-one**  
(**3w**)

1-(2,6-dimethylphenyl)pyrrolidine **1w** was reacted with 3-acryloyl-4,4-dimethyloxazolidin-2-one **2r** following the **General Procedure for Stereoselective Mannich Reactions**. The  $^1\text{H}$  NMR analysis of the crude material revealed that **3w-anti** and **3w-syn** were obtained in the ratio of 3.8:1. After purification by column chromatography (hexanes: Et<sub>2</sub>O = 19:1 then 9:1), **3w-anti** (39 mg, 56%) and **3w-syn** (10 mg, 15%) were obtained as single diastereomers. The absolute configurations of **3w-anti** and **3w-syn** were assigned in analogy, see SI Section 4.

**3w-anti:**  $^1\text{H}$  NMR (600 MHz, CDCl<sub>3</sub>)  $\delta$  6.98 – 6.89 (m, 3H), 4.09 (q,  $J = 6.7$  Hz, 1H), 3.83 (d,  $J = 8.2$  Hz, 1H), 3.78 – 3.70 (m, 2H), 3.34 (ddd,  $J = 8.2, 7.0, 5.4$  Hz, 1H), 2.96 (td,  $J = 7.9, 6.2$  Hz, 1H), 2.27 (d,  $J = 1.9$  Hz, 6H), 2.13 (dq,  $J = 12.0, 6.7$  Hz, 1H), 2.02 – 1.82 (m, 3H), 1.35 (s, 3H), 1.12 (d,  $J = 6.9$  Hz, 3H), 1.04 (s, 3H);  $^{13}\text{C}$  NMR (151 MHz, CDCl<sub>3</sub>)  $\delta$  177.04, 153.56, 144.81, 139.12, 137.98, 129.43, 127.90, 125.16, 74.71, 61.71, 60.25, 52.50, 44.52, 29.84, 25.27, 24.43, 24.08, 19.28, 18.98, 14.99; IR (neat) 2965, 2874, 1774, 1699, 1466, 1374, 1304, 1219, 1176, 1085, 1035, 766 cm<sup>-1</sup>; HRMS (DART)  $m/z$  Calcd for C<sub>20</sub>H<sub>28</sub>N<sub>2</sub>O<sub>3</sub> (MH<sup>+</sup>): 345.2172; found: 345.2181;  $[\alpha]^{25}_D = -36.2^\circ$  ( $c = 0.8$ , EtOH); HPLC (Chiralcel IC; 5.0%/ 95.0% *n*-butanol/ hexanes, 0.2 mL/min; tr = 27.3 min (minor), 30.4 min (major); 89:11 er.

**3w-syn:**  $^1\text{H}$  NMR (500 MHz, CDCl<sub>3</sub>)  $\delta$  6.98 (t,  $J = 8.1$  Hz, 2H), 6.92 (t,  $J = 7.4$  Hz, 1H), 4.04 (ddd,  $J = 8.9, 6.5, 2.7$  Hz, 1H), 3.90 (d,  $J = 8.3$  Hz, 1H), 3.82 (d,  $J = 8.3$  Hz, 1H), 3.75 (q,  $J = 6.7$  Hz, 1H), 3.36 (td,  $J = 7.9, 2.8$  Hz, 1H), 2.89 (td,  $J = 8.9, 6.7$  Hz, 1H), 2.35 (s, 3H), 2.27 (s, 1H), 2.25 (s, 3H), 2.09 – 1.96 (m, 1H), 1.95 – 1.84 (m, 1H), 1.75 (ddt,  $J = 12.9, 6.7, 2.9$  Hz, 1H), 1.45 (s, 3H), 1.17 (s, 3H), 1.00 (d,  $J = 6.7$  Hz, 3H);  $^{13}\text{C}$  NMR (151 MHz, CDCl<sub>3</sub>)  $\delta$

177.12, 153.92, 146.85, 138.99, 135.49, 129.56, 128.34, 124.83, 74.93, 63.31, 60.53, 53.70, 46.52, 31.66, 25.46, 24.62, 23.87, 19.31, 19.12, 13.65; **IR** (neat) 2965, 2874, 1774, 1699, 1466, 1374, 1304, 1219, 1176, 1085, 1035, 766  $\text{cm}^{-1}$ ; **HRMS** (DART)  $m/z$  Calcd for  $\text{C}_{20}\text{H}_{28}\text{N}_2\text{O}_3$  ( $\text{MH}^+$ ): 345.2172; found: 345.2181; **HPLC** (Chiralcel IC; 5.0%/ 95.0% *n*-butanol/ hexanes, 0.5 mL/min;  $t_r$  = 10.5 min (minor), 11.7 min (major); 93:7 er.

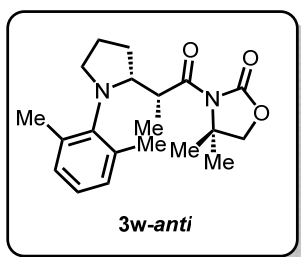

Acq. Operator : SYSTEM  
 Acq. Instrument : Wasa\_LC1  
 Injection Date : 6/21/2018 12:30:35 AM  
 Acq. Method : C:\Chem32\1\Data\JOE 2018-06-21 00-28-47\column2 5.0%BuOH 95% hex 60min-0.2mL.M

Seq. Line : 1  
 Location : 1  
 Inj : 1  
 Inj Volume : 6.000  $\mu\text{l}$

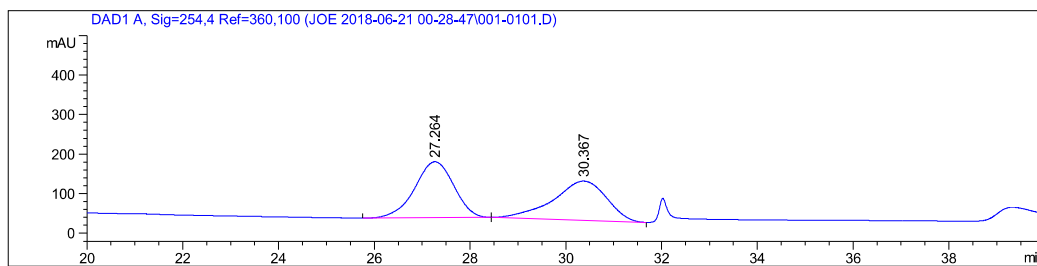

Signal 1: DAD1 A, Sig=254,4 Ref=360,100

| Peak # | RetTime [min] | Type | Width [min] | Area [mAU*s] | Height [mAU] | Area %  |
|--------|---------------|------|-------------|--------------|--------------|---------|
| 1      | 27.264        | BB   | 0.8812      | 8043.24463   | 141.49239    | 51.0721 |
| 2      | 30.367        | BB   | 1.1558      | 7705.54541   | 99.46435     | 48.9279 |





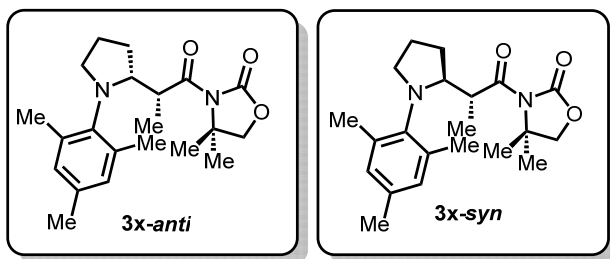

### 3-(2-(1-mesitylpyrrolidin-2-yl)propanoyl)-4,4-dimethyloxazolidin-2-one (**3x**)

1-mesitylpyrrolidine **1x** was reacted with 3-acryloyl-4,4-dimethyloxazolidin-2-one **2r** following the **General Procedure for Stereoselective Mannich Reactions**. The  $^1\text{H}$  NMR analysis of the crude material revealed that **3x-anti** and **3x-syn** were obtained in the ratio of 3.5:1. After purification by column chromatography (hexanes: Et<sub>2</sub>O = 19:1 then 9:1), **3x-anti** (39 mg, 54%) and **3x-syn** (11 mg, 15%) were obtained as single diastereomers. The absolute configurations of **3x-anti** and **3x-syn** were assigned in analogy, see SI Section 4.

**3x-anti**:  $^1\text{H}$  NMR (600 MHz, CDCl<sub>3</sub>)  $\delta$  6.77 (d,  $J = 9.0$  Hz, 2H), 4.04 (q,  $J = 6.7$  Hz, 1H), 3.83 (d,  $J = 8.2$  Hz, 1H), 3.78 – 3.63 (m, 2H), 3.31 (td,  $J = 7.8, 5.6$  Hz, 1H), 2.95 (td,  $J = 7.9, 6.2$  Hz, 1H), 2.23 (d,  $J = 6.3$  Hz, 6H), 2.19 (s, 3H), 2.14 – 2.06 (m, 1H), 1.99 – 1.88 (m, 2H), 1.88 – 1.78 (m, 1H), 1.36 (s, 3H), 1.12 (d,  $J = 7.0$  Hz, 3H), 1.06 (s, 3H);  $^{13}\text{C}$  NMR (151 MHz, CDCl<sub>3</sub>)  $\delta$  177.11, 153.53, 141.99, 139.02, 137.81, 134.53, 130.16, 128.62, 74.71, 61.73, 60.24, 52.53, 44.37, 29.81, 25.19, 24.46, 23.91, 20.70, 19.10, 18.84, 14.84; **IR** (neat) 2965, 1775, 1700, 1477, 1375, 1304, 1176, 1084, 765 cm<sup>-1</sup>; **HRMS** (DART)  $m/z$  Calcd for C<sub>21</sub>H<sub>30</sub>N<sub>2</sub>O<sub>3</sub> (MH<sup>+</sup>): 359.2329; found: 359.2311;  $[\alpha]_D^{25} = -10.6^\circ$  (c = 0.3, EtOH).

**3x-syn**:  $^1\text{H}$  NMR (600 MHz, CDCl<sub>3</sub>)  $\delta$  6.79 (d,  $J = 14.1$  Hz, 2H), 4.02 – 3.93 (m, 1H), 3.90 (dd,  $J = 8.3, 1.2$  Hz, 1H), 3.82 (d,  $J = 8.3$  Hz, 1H), 3.74 (p,  $J = 6.7$  Hz, 1H), 3.32 (td,  $J = 9.6, 5.0$  Hz, 1H), 2.87 (q,  $J = 8.3$  Hz, 1H), 2.30 (s, 3H), 2.27 – 2.21 (m, 1H), 2.20 (s, 6H), 2.06 – 1.94 (m, 1H), 1.88 (d,  $J = 9.8$  Hz, 1H), 1.73 (dd,  $J = 14.3, 6.7$  Hz, 1H), 1.45 (s, 3H), 1.18 (s, 3H), 0.99 (dd,  $J = 6.8, 1.2$  Hz, 3H);  $^{13}\text{C}$  NMR (151 MHz, CDCl<sub>3</sub>)  $\delta$  177.21, 153.92, 144.21, 138.73, 135.22, 134.22, 130.20, 129.05, 74.92, 63.38, 60.53, 53.84, 46.51, 31.64, 25.42, 24.64, 23.80, 20.66, 19.17, 18.98, 13.74; **IR** (neat) 2965, 1775, 1700, 1477, 1375, 1304, 1176, 1084, 765 cm<sup>-1</sup>; **HRMS** (DART)  $m/z$  Calcd for C<sub>21</sub>H<sub>30</sub>N<sub>2</sub>O<sub>3</sub> (MH<sup>+</sup>): 359.2329; found:

359.2311; **HPLC** (Chiralpak AS-H then OD-H; 2.5%/ 97.5% isopropanol/ hexanes, 0.5 mL/min; tr = 19.7 min (major), 19.9 min (minor); 93:7 er.

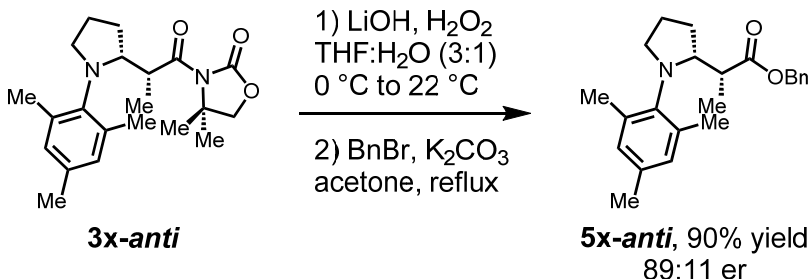

**3x-anti** was transformed into the corresponding benzyl ester **5x-anti** following previously reported literatures.<sup>19,20</sup> **<sup>1</sup>H NMR** (600 MHz, CDCl<sub>3</sub>) δ 7.35 – 7.25 (m, 3H), 7.22 – 7.17 (m, 2H), 6.79 (d, *J* = 20.5 Hz, 2H), 4.69 (d, *J* = 12.4 Hz, 1H), 4.62 (d, *J* = 12.5 Hz, 1H), 3.96 (dt, *J* = 7.5, 5.6 Hz, 1H), 3.37 – 3.26 (m, 1H), 2.97 (q, *J* = 7.7 Hz, 1H), 2.42 (p, *J* = 6.8 Hz, 1H), 2.24 (s, 3H), 2.20 (d, *J* = 8.8 Hz, 6H), 2.05 (dq, *J* = 12.2, 7.6 Hz, 1H), 1.96 – 1.86 (m, 2H), 1.82 – 1.73 (m, 1H), 1.15 – 1.11 (m, 3H); **IR** (neat) 2921, 2852, 1718, 1480, 1455, 1373, 1262, 1183, 1150, 1110, 851, 750, 696 cm<sup>-1</sup>; **HRMS** (DART) *m/z* Calcd for C<sub>23</sub>H<sub>30</sub>NO<sub>2</sub> (MH<sup>+</sup>): 352.2271; found: 352.2254; [α]<sup>25</sup><sub>D</sub> = -30.1° (*c* = 0.4, EtOH); **HPLC** (Chiralpak OJ-H; 1.0%/ 99.0% isopropanol/ hexanes, 0.5 mL/min; tr = 11.1 min (minor), 16.5 min (major); 89:11 er.

```

Acq. Operator   : SYSTEM                               Seq. Line :    2
Acq. Instrument : Wasa_LC1                             Location  :   21
Injection Date  : 6/21/2018 6:16:21 PM                 Inj       :    1
                                                    Inj Volume: 8.000 µl
Method          : C:\Chem32\1\Data\JOE 2018-06-21 17-34-17\column1 1% IPA 99% hex 40min-0.5mL
                  .M (Sequence Method)
  
```

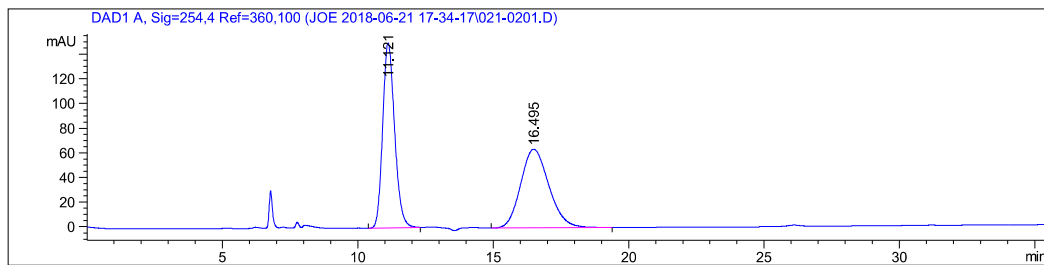





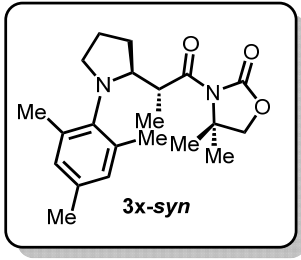

Acq. Operator : SYSTEM  
 Acq. Instrument : Wasa LC1  
 Injection Date : 6/22/2018 6:04:59 PM  
 Acq. Method : C:\Chem32\1\Data\JOE 2018-06-22 17-02-06\column1 2.5% IPA 97.5% hex 40min-0.5mL.M

Seq. Line : 2  
 Location : 11  
 Inj : 1  
 Inj Volume : 4.000 µl

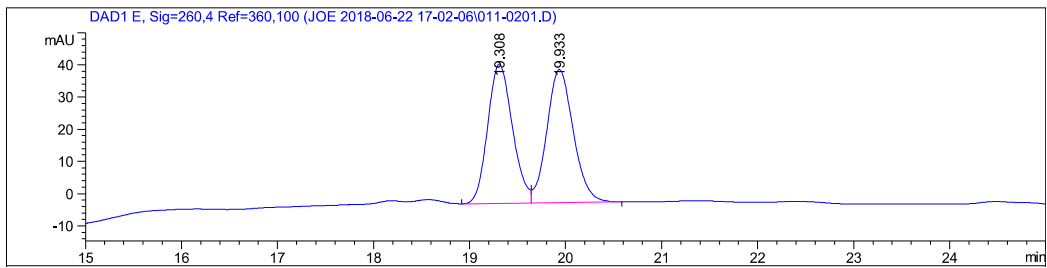

Signal 5: DAD1 E, Sig=260,4 Ref=360,100

| Peak # | RetTime [min] | Type | Width [min] | Area [mAU*s] | Height [mAU] | Area %  |
|--------|---------------|------|-------------|--------------|--------------|---------|
| 1      | 19.308        | BV   | 0.2767      | 774.05029    | 43.28084     | 49.4364 |
| 2      | 19.933        | VB   | 0.2932      | 791.69958    | 41.37559     | 50.5636 |



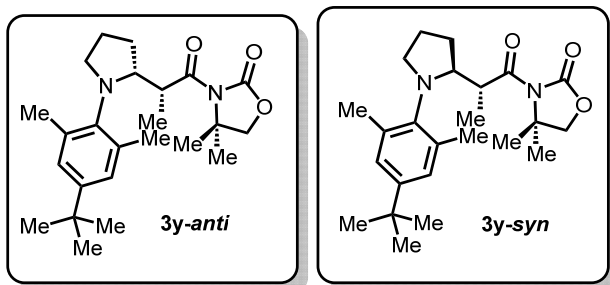

**3-(2-(1-(4-(*tert*-Butyl)-2,6-dimethylphenyl)pyrrolidin-2-yl)propanoyl)-4,4-dimethyloxazolidin-2-one (3y)**

1-(4-(*tert*-Butyl)-2,6-dimethylphenyl)pyrrolidine **1y** was reacted with 3-acryloyl-4,4-dimethyloxazolidin-2-one **2r** following the **General Procedure for Stereoselective Mannich Reactions**. The  $^1\text{H}$  NMR analysis of the crude material revealed that **3y-anti** and **3y-syn** were obtained in the ratio of 4.4:1. After purification by column chromatography (hexanes: Et<sub>2</sub>O = 19:1 then 9:1), **3y-anti** (46 mg, 57%) and **3y-syn** (10 mg, 13%) were obtained as single diastereomers. The absolute configurations of **3y-anti** and **3y-syn** were assigned in analogy, see SI Section 4.

**3y-anti:**  $^1\text{H}$  NMR (500 MHz, CDCl<sub>3</sub>)  $\delta$  6.99 – 6.91 (m, 2H), 4.10 (q,  $J$  = 6.8 Hz, 1H), 3.83 (dd,  $J$  = 8.2, 1.0 Hz, 1H), 3.77 – 3.67 (m, 2H), 3.38 – 3.26 (m, 1H), 2.99 – 2.89 (m, 1H), 2.26 (d,  $J$  = 3.0 Hz, 6H), 2.17 – 2.08 (m, 1H), 1.90 (dddd,  $J$  = 27.8, 23.7, 12.1, 6.6 Hz, 3H), 1.34 (s, 3H), 1.25 (d,  $J$  = 1.0 Hz, 9H), 1.12 (dd,  $J$  = 7.0, 1.0 Hz, 3H), 0.98 (s, 3H);  $^{13}\text{C}$  NMR (126 MHz, CDCl<sub>3</sub>)  $\delta$  177.07, 153.57, 147.42, 142.12, 138.16, 137.05, 126.32, 124.94, 74.70, 61.68, 60.22, 52.76, 44.74, 34.01, 31.46, 30.16, 25.20, 24.40, 24.18, 19.55, 19.23, 15.34; **IR** (neat) 2963, 2871, 1774, 1700, 1483, 1459, 1373, 1305, 1221, 1176, 1084, 766 cm<sup>-1</sup>; **HRMS** (DART)  $m/z$  Calcd for C<sub>24</sub>H<sub>36</sub>N<sub>2</sub>O<sub>3</sub> (MH<sup>+</sup>): 401.2799; found: 401.2789;  $[\alpha]_D^{25} = -40.6^\circ$  ( $c$  = 1.0, EtOH).

**3y-syn:**  $^1\text{H}$  NMR (500 MHz, CDCl<sub>3</sub>)  $\delta$  7.05 – 6.87 (m, 2H), 4.06 (ddd,  $J$  = 8.4, 5.4, 2.4 Hz, 1H), 3.87 (d,  $J$  = 8.3 Hz, 1H), 3.73 (dd,  $J$  = 12.8, 7.4 Hz, 2H), 3.41 – 3.28 (m, 1H), 2.89 (ddd,  $J$  = 9.5, 8.5, 6.5 Hz, 1H), 2.34 (s, 3H), 2.32 – 2.25 (m, 1H), 2.22 (s, 3H), 2.09 – 1.94 (m, 1H), 1.94 – 1.84 (m, 1H), 1.78 (ddt,  $J$  = 12.6, 7.2, 2.7 Hz, 1H), 1.42 (s, 3H), 1.25 (s, 9H), 1.06 (d,  $J$

= 6.7 Hz, 3H), 1.00 (s, 3H);  $^{13}\text{C}$  NMR (151 MHz,  $\text{CDCl}_3$ )  $\delta$  176.79, 153.95, 147.42, 143.99, 138.31, 134.51, 126.44, 125.34, 74.92, 63.20, 60.51, 54.05, 46.42, 33.98, 31.61, 31.41, 25.52, 24.58, 24.45, 23.65, 19.54, 12.71; **IR** (neat) 2963, 2871, 1774, 1700, 1483, 1459, 1373, 1305, 1221, 1176, 1084, 766  $\text{cm}^{-1}$ ; **HRMS** (DART)  $m/z$  Calcd for  $\text{C}_{24}\text{H}_{36}\text{N}_2\text{O}_3$  ( $\text{MH}^+$ ): 401.2799; found: 401.2789; **HPLC** (Chiralpak IA then OJ-H; 1.0%/ 99.0% isopropanol/ hexanes, 0.1 mL/min;  $t_r$  = 103.3 min (major), 108.1 min (minor); 98:2 er.

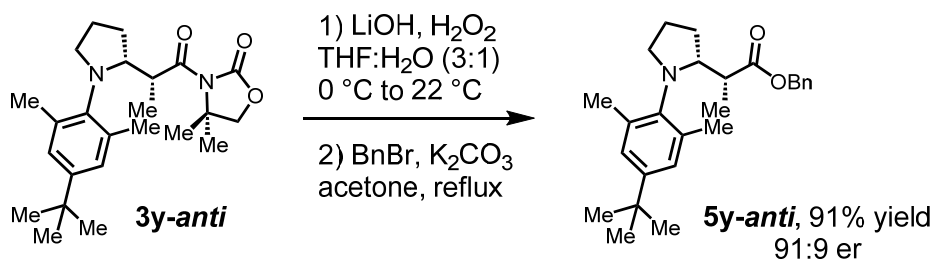

**3y-anti** was transformed into the corresponding benzyl ester **5y-anti** following previously reported literatures.<sup>19,20</sup>  $^1\text{H}$  NMR (500 MHz,  $\text{CDCl}_3$ )  $\delta$  7.34 – 7.27 (m, 3H), 7.21 – 7.18 (m, 2H), 7.00 (d,  $J$  = 2.4 Hz, 1H), 6.96 (d,  $J$  = 2.4 Hz, 1H), 4.65 (d,  $J$  = 12.5 Hz, 1H), 4.54 (d,  $J$  = 12.5 Hz, 1H), 3.98 (td,  $J$  = 6.9, 5.3 Hz, 1H), 3.39 – 3.29 (m, 1H), 3.00 (q,  $J$  = 7.7 Hz, 1H), 2.43 (p,  $J$  = 6.9 Hz, 1H), 2.29 (s, 3H), 2.24 (s, 3H), 2.07 (dq,  $J$  = 12.1, 7.6 Hz, 1H), 1.98 – 1.85 (m, 2H), 1.84 – 1.73 (m, 1H), 1.25 (s, 9H), 1.13 (d,  $J$  = 7.0 Hz, 3H); **IR** (neat) 2959, 2924, 2869, 2359, 2158, 1720, 1553, 1482, 1455, 1361, 1222, 1151, 1109, 732, 696  $\text{cm}^{-1}$ ; **HRMS** (DART)  $m/z$  Calcd for  $\text{C}_{26}\text{H}_{36}\text{NO}_2$  ( $\text{MH}^+$ ): 394.2741; found: 394.2733;  $[\alpha]_D^{25}$  =  $-38.9^\circ$  ( $c$  = 0.5, EtOH); **HPLC** (Chiralpak OJ-H; 1.0%/ 99.0% isopropanol/ hexanes, 0.5 mL/min;  $t_r$  = 7.3 min (minor), 8.3 min (major); 91:9 er.







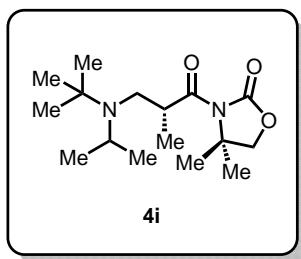

**3-(3-(*tert*-Butyl(isopropyl)amino)-2-methylpropanoyl)-4,4-dimethyloxazolidin-2-one (4i)**

*N*-Isopropyl-*N*,2-dimethylpropan-2-amine **1r** was reacted with 3-acryloyl-4,4-dimethyloxazolidin-2-one **2r** following the **General Procedure for Stereoselective Mannich Reactions**. After purification by silica gel column chromatography (hexanes: Et<sub>3</sub>N = 98.5 : 1.5), **4i** (30.8 mg, 52%) was obtained as a colorless oil.

**4i:** <sup>1</sup>H NMR (600 MHz, CDCl<sub>3</sub>) δ 4.01 – 3.93 (m, 2H), 3.83 (h, *J* = 6.9 Hz, 1H), 3.24 (hept, *J* = 6.8 Hz, 1H), 3.02 (dd, *J* = 14.2, 7.9 Hz, 1H), 2.49 (dd, *J* = 14.2, 6.3 Hz, 1H), 1.58 (s, 3H), 1.56 (s, 3H), 1.11 (d, *J* = 6.9 Hz, 3H), 1.06 (s, 9H), 1.01 (dd, *J* = 9.1, 6.8 Hz, 6H); <sup>13</sup>C NMR (151 MHz, CDCl<sub>3</sub>) δ 178.92, 153.92, 75.03, 60.62, 55.73, 46.50, 46.47, 41.02, 28.49, 24.85, 24.81, 23.48, 22.12, 15.70; IR (neat) 2969, 2874, 1774, 1703, 1460, 1366, 1305, 1223, 1177, 1082, 939, 765 cm<sup>-1</sup>; HRMS (DART) *m/z* Calcd for C<sub>16</sub>H<sub>30</sub>N<sub>2</sub>O<sub>3</sub> (MH<sup>+</sup>): 299.2329; found: 299.2338; [α]<sub>D</sub><sup>25</sup> = -20.7° (c = 1.0, EtOH).



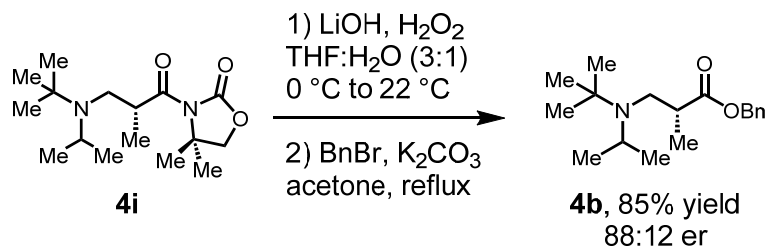

**4i** was transformed into the corresponding benzyl ester **4b** following previously reported literatures.<sup>19,20</sup> **HPLC** (Chiralcel OD-H; 0.5%/ 99.5% isopropanol/ hexanes, 1.0 mL/min; **4b**: tr = 7.9 min (major), 8.5 min (minor); 88:12 er.

```

Acq. Operator   : SYSTEM                               Seq. Line :    2
Acq. Instrument : Wasa_LC1                             Location  :   41
Injection Date  : 1/22/2018 8:13:40 PM                 Inj       :    1
                                                    Inj Volume: 4.000 µl
Acq. Method     : C:\Chem32\1\Data\JOE 2018-01-22 19-11-39\column1 1% IPA 99% hex 60min-0.5mL
                                                         .M
  
```

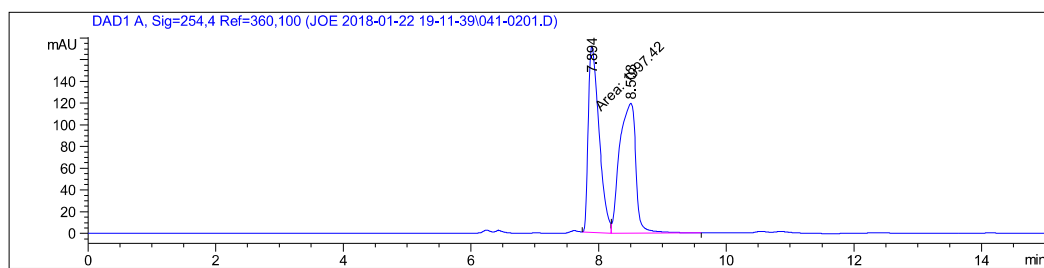

Signal 1: DAD1 A, Sig=254,4 Ref=360,100

| Peak # | RetTime [min] | Type | Width [min] | Area [mAU*s] | Height [mAU] | Area %  |
|--------|---------------|------|-------------|--------------|--------------|---------|
| 1      | 7.894         | MM   | 0.1943      | 1997.41541   | 171.33118    | 48.6461 |
| 2      | 8.503         | VB   | 0.3002      | 2108.59668   | 119.28552    | 51.3539 |



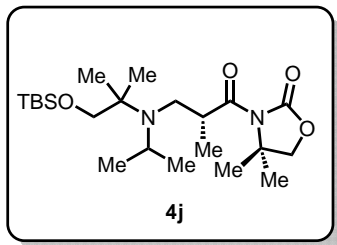

**3-(3-((1-((*tert*-Butyldimethylsilyl)oxy)-2-methylpropan-2-yl)(isopropyl)amino)-2-methylpropanoyl)-4,4-dimethyloxazolidin-2-one (4j)**

1-((*tert*-Butyldimethylsilyl)oxy)-*N*-ethyl-*N*-isopropyl-2-methylpropan-2-amine **1s** was reacted with 3-acryloyl-4,4-dimethyloxazolidin-2-one **2r** following the **General Procedure for Stereoselective Mannich Reactions**. After purification by silica gel column chromatography (hexanes: Et<sub>3</sub>N = 98.5 : 1.5), **4j** (40 mg, 46%) was obtained as a colorless oil.

**4j**: <sup>1</sup>H NMR (400 MHz, CDCl<sub>3</sub>) δ 4.03 – 3.91 (m, 2H), 3.81 (h, *J* = 6.9 Hz, 1H), 3.37 (s, 2H), 3.26 (h, *J* = 6.7 Hz, 1H), 3.13 (dd, *J* = 14.4, 7.8 Hz, 1H), 2.64 (dd, *J* = 14.4, 6.6 Hz, 1H), 1.56 (d, *J* = 7.3 Hz, 6H), 1.09 (d, *J* = 6.8 Hz, 3H), 1.07 – 0.99 (m, 12H), 0.88 (s, 9H), 0.01 (s, 6H); <sup>13</sup>C NMR (151 MHz, CDCl<sub>3</sub>) δ 178.83, 153.87, 75.00, 69.38, 60.57, 59.40, 46.88, 46.31, 41.06, 25.84, 24.80, 24.34, 24.24, 23.52, 22.22, 18.15, 15.51, -5.60; **IR** (neat) 2958, 2930, 2888, 2857, 1780, 1705, 1467, 1387, 1362, 1304, 1252, 1087, 837, 774 cm<sup>-1</sup>; **HRMS** (DART) *m/z* Calcd for C<sub>22</sub>H<sub>44</sub>N<sub>2</sub>O<sub>4</sub>Si (MH<sup>+</sup>): 429.3143; found: 429.3133; [α]<sub>D</sub><sup>25</sup> = -7.3° (c = 1.0, EtOH).

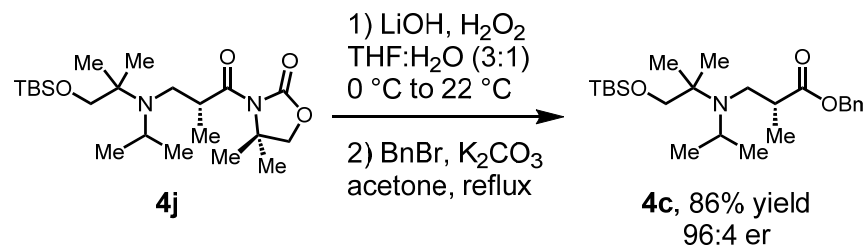

**4j** was transformed into the corresponding benzyl ester **4c** following previously reported literatures.<sup>19,20</sup> **HPLC** (Chiralcel OD-H; 0.5%/ 99.5% *n*-butanol/ hexanes, 1.0 mL/min; **4c**: tr = 6.5 min (minor), 12.0 min (major); 96:4 er.

```

Acq. Operator   : SYSTEM                               Seq. Line :    4
Acq. Instrument : Wasa_LC1                             Location  :   31
Injection Date  : 6/19/2018 11:06:37 PM              Inj       :    1
                                                    Inj Volume: 4.000 µl
Acq. Method     : C:\Chem32\1\Data\JOE 2018-06-19 21-01-56\column1 0.5% nBuOH 99.5% hex 40min
                                                         -1.0mL.M
Last changed    : 6/19/2018 9:01:59 PM by SYSTEM
Analysis Method : C:\Chem32\1\Data\JOE 2018-06-19 21-01-56\column1 0.5% nBuOH 99.5% hex 40min
                                                         -1.0mL.M (Sequence Method)
  
```

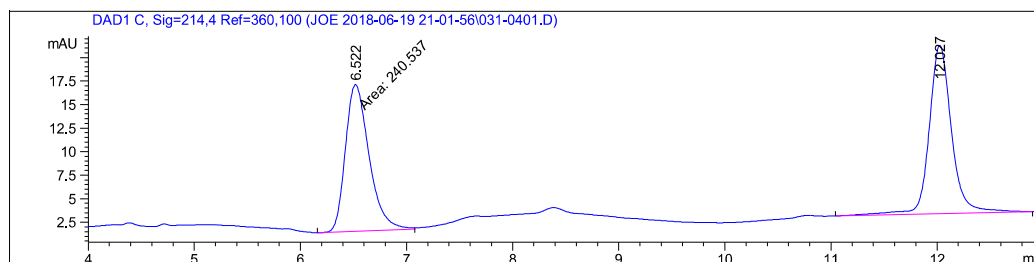

Signal 3: DAD1 C, Sig=214,4 Ref=360,100

| Peak # | RetTime [min] | Type | Width [min] | Area [mAU*s] | Height [mAU] | Area %  |
|--------|---------------|------|-------------|--------------|--------------|---------|
| 1      | 6.522         | MM   | 0.2577      | 240.53671    | 15.55946     | 47.8882 |
| 2      | 12.027        | BB   | 0.2228      | 261.75095    | 17.87901     | 52.1118 |





## 4. Procedure for Large Scale Reaction, Determination of Absolute Configuration, Derivatizations of the Mannich Products and Control Experiments

### 4.1 Procedure for the Large Scale Reaction

We carried out the following studies in order to determine the absolute configuration of enantioenriched products **3q**, **3r**, **3s**, **3t**, **3u-(S)**, **3u-(R)**, and **3v** and the relative configuration of products **3a** to **3p** and **4a** to **4h**. We first obtained product **3u-(R)** in 1.63 g by the following procedure.

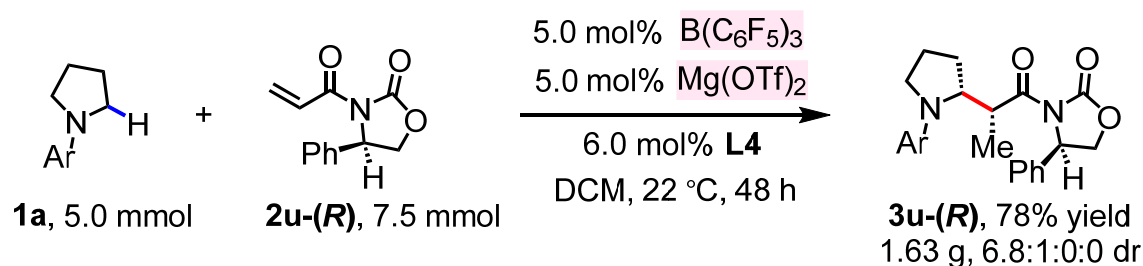

To a 35 mL oven-dried sealed tube was added  $Mg(OTf)_2$  (0.25 mmol), ligand **L4** (0.30 mmol), DCM (10 mL) under nitrogen atmosphere. The mixture was stirred for 30 min at 22 °C, then (R)-3-acryloyl-4-phenyloxazolidin-2-one **2u-(R)** (1.3 g, 6.0 mmol), 1-(4-methoxy-2,6-dimethylphenyl)pyrrolidine **1a** (1.02 g, 5.0 mmol),  $B(C_6F_5)_3$  (0.25 mmol), and DCM (5.0 mL) were added to the vessel. The reaction mixture was stirred at 22 °C for 48 h. Upon completion, the solvent was removed *in vacuo*. The *anti:syn* ratio was determined to be 6.8:1:0:0 by  $^1H$  NMR analysis of the crude reaction mixture. Purification by silica gel column chromatography using 4:1 hexanes:Et<sub>2</sub>O gave the product as a colorless solid as a mixture of diastereomers (1.63 g, 78% yield). Further purification was carried out by silica gel column chromatography using 4:1 hexanes:Et<sub>2</sub>O to obtain the major diastereomer in 1.47 g as a colorless oil.

We then subjected **3u-(R)** to the following derivatization studies which yielded **5a**, **5b**, **5c**, and **5d**.

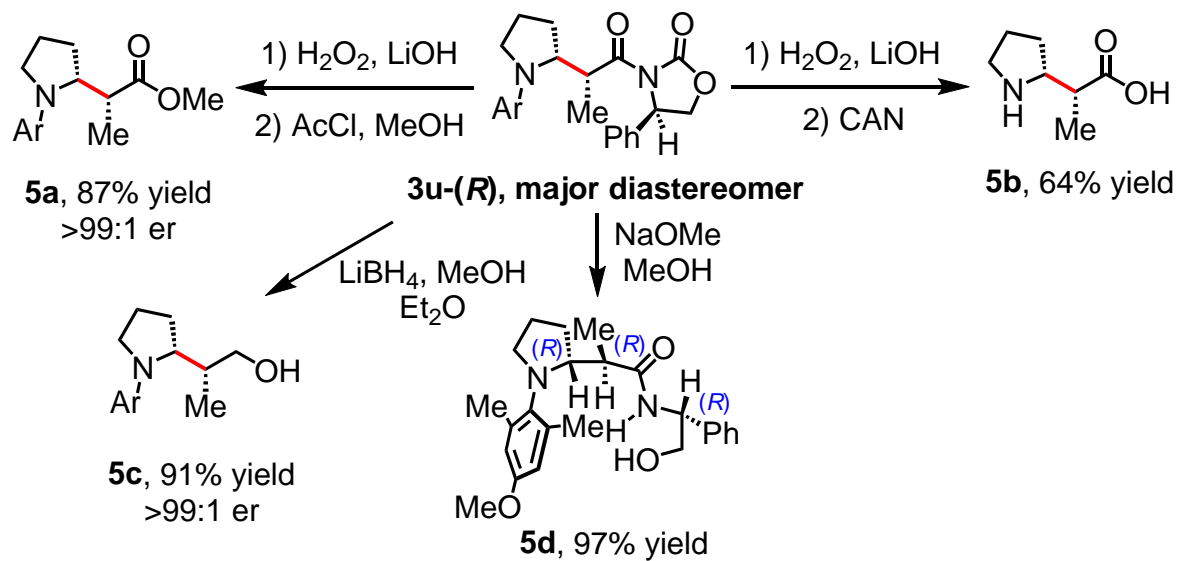

III

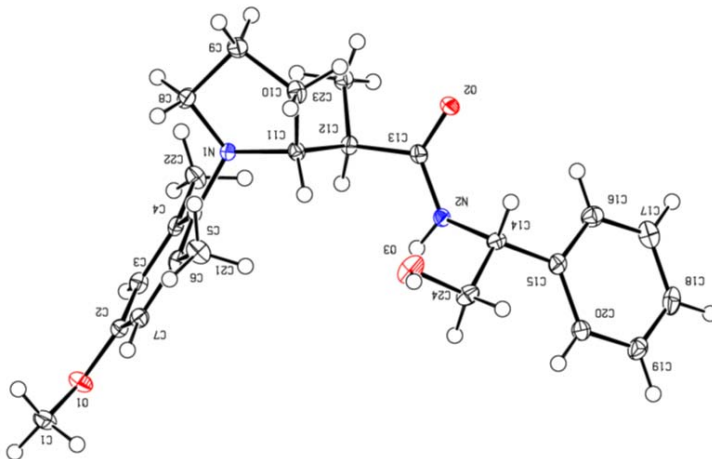



## 4.2 Determination of the Absolute Configuration

The absolute configuration of **3u-(R)-major** was determined by X-ray crystallographic analysis of **5d-major**.

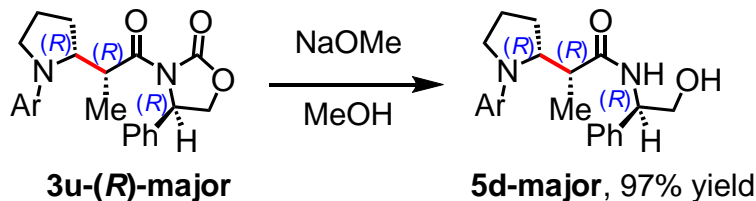

### **(R)-N-((R)-2-Hydroxy-1-phenylethyl)-2-((R)-1-(4-methoxy-2,6-dimethylphenyl)pyrrolidin-2-yl)propanamide (5d-major)**

(R)-N-((R)-2-Hydroxy-1-phenylethyl)-2-((R)-1-(4-methoxy-2,6-dimethylphenyl)pyrrolidin-2-yl)propanamide (**5d-major**) was synthesized following a known procedure.<sup>21</sup> A solution of **3u-(R)-major** (590 mg, 1.4 mmol) in MeOH (3.5 mL) was chilled to 0 °C, whereupon NaOMe (827 mg, 15.3 mmol) was added portionwise. The reaction was allowed to stir for 1 h, whereupon the reaction was quenched with aq. NH<sub>4</sub>Cl (3 mL). The aqueous layer was extracted with EtOAc (3 x 5 mL). The combined organic layers were dried (MgSO<sub>4</sub>), filtered, and concentrated *in vacuo*. The crude product was purified by silica gel chromatography (3:1 hexanes:EtOAc) to afford **5d-major** as a crystalline solid (393 mg, 97% yield). The solid material was recrystallized in 19:1 hexanes:isopropanol to obtain a single crystal, which was subjected to the X-ray crystallographic analysis. The X-ray crystallographic analysis revealed that the absolute configuration of **5d-major** is (R,R,R); see SI Section 8 for X-ray crystallographic data.

<sup>1</sup>H NMR (600 MHz, CDCl<sub>3</sub>) δ 7.32 (t, *J* = 7.5 Hz, 2H), 7.29 – 7.25 (m, 1H), 7.20 – 7.17 (m, 2H), 6.59 (d, *J* = 3.0 Hz, 1H), 6.56 (d, *J* = 3.1 Hz, 1H), 5.89 (d, *J* = 6.3 Hz, 1H), 4.74 (td, *J* = 6.0, 3.6 Hz, 1H), 3.92 (dt, *J* = 7.1, 5.4 Hz, 1H), 3.75 (s, 3H), 3.63 (tdd, *J* = 10.7, 8.9, 7.2, 3.6 Hz, 2H), 3.26 (dt, *J* = 8.4, 5.9 Hz, 1H), 2.98 (q, *J* = 7.6 Hz, 1H), 2.89 (d, *J* = 6.1 Hz, 1H), 2.29 (s, 3H), 2.25 (s, 3H), 2.17 (qd, *J* = 6.9, 5.1 Hz, 1H), 2.07 (dq, *J* = 11.7, 7.5, 7.1 Hz, 1H), 1.93 – 1.83 (m, 3H), 1.13 (d, *J* = 7.0 Hz, 3H); <sup>13</sup>C NMR (151 MHz, CDCl<sub>3</sub>) δ 178.92, 159.42, 142.80, 141.78, 141.64, 140.38, 131.52, 130.50, 129.26, 117.31, 115.72, 69.52, 65.50, 59.15, 57.85, 55.28, 49.10, 31.64, 27.75, 22.27, 22.18, 16.66; IR (neat) 3383, 3305, 2952, 1644,

1602, 1601, 1512, 1492, 1466, 1261, 1154, 1068, 700  $\text{cm}^{-1}$ ; **HRMS** (DART)  $m/z$  Calcd for  $\text{C}_{26}\text{H}_{33}\text{N}_2\text{O}_4$  ( $\text{MH}^+$ ): 274.1596; found: 274.1588.

The absolute configuration of **3u-(R)-minor** was determined by X-ray crystallographic analysis of **5d-minor**.

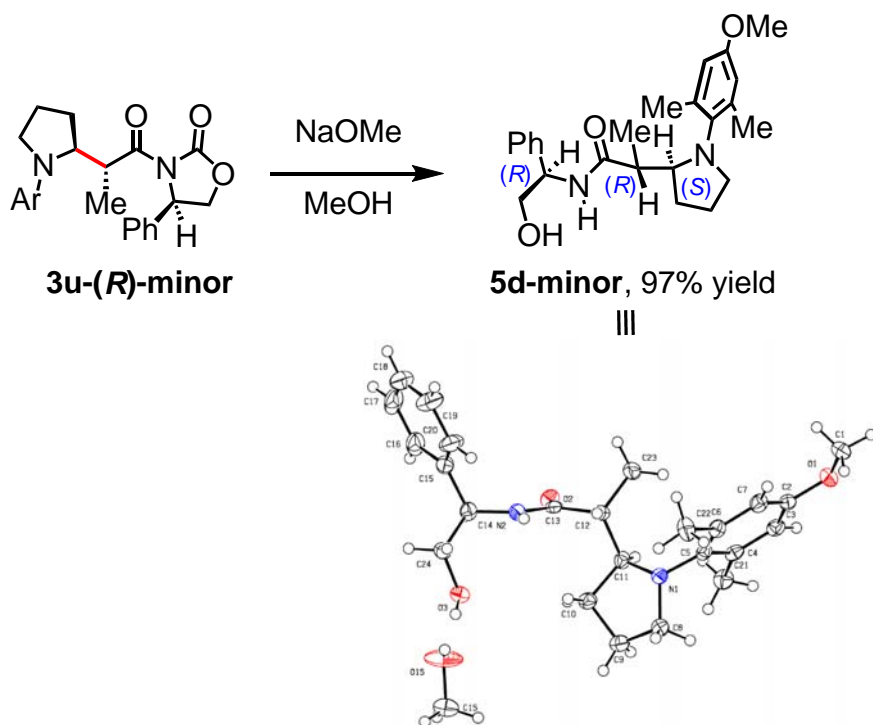

**(R)-N-((R)-2-Hydroxy-1-phenylethyl)-2-((S)-1-(4-methoxy-2,6-dimethylphenyl)pyrrolidin-2-yl)propanamide (5d-minor)**

(R)-N-((R)-2-Hydroxy-1-phenylethyl)-2-((S)-1-(4-methoxy-2,6-dimethylphenyl)pyrrolidin-2-yl)propanamide (**5d-minor**) was synthesized following a known procedure<sup>21</sup>, and the Mannich product **5d-minor** was obtained as a colorless oil. Upon addition of isopropanol, **5d-minor** precipitated to a white solid. **5d-minor** was recrystallized using the vapor-vapor diffusion method, using MeOH to dissolve the product in an inner vial, and pentane as the precipitant placed in the outer vial in order for slow diffusion to occur into the inner vial. The solution was cooled to 0 °C, whereupon a crystal was obtained for X-ray crystallography. The X-ray crystallographic analysis revealed that the absolute configuration of **5d-minor** is (R,R,S), see SI Section 8 for X-ray crystallographic data.

**<sup>1</sup>H NMR** (500 MHz, CDCl<sub>3</sub>) δ 7.38 – 7.24 (m, 5H), 6.94 (d, *J* = 6.2 Hz, 1H), 6.58 – 6.50 (m, 2H), 4.99 (td, *J* = 6.5, 3.7 Hz, 1H), 3.97 – 3.88 (m, 1H), 3.88 – 3.81 (m, 1H), 3.74 (s, 3H), 3.72 – 3.67 (m, 1H), 3.33 (dq, *J* = 9.7, 3.3 Hz, 2H), 3.04 – 2.94 (m, 1H), 2.37 – 2.31 (m, 1H), 2.25 (s, 3H), 2.20 (dd, *J* = 12.3, 8.3 Hz, 1H), 2.16 (s, 3H), 2.10 – 2.02 (m, 1H), 1.97 (ddq, *J* = 20.5, 12.3, 4.4 Hz, 1H), 0.97 (dd, *J* = 7.0, 1.1 Hz, 3H).

### 4.3 Procedures for the Derivatization of Enantioenriched Mannich Products

Compounds **3u-(R)-anti**, **3u-(R)-syn**, and **3r** could be converted into the corresponding methyl esters (**5a-anti** or **5a-syn**).

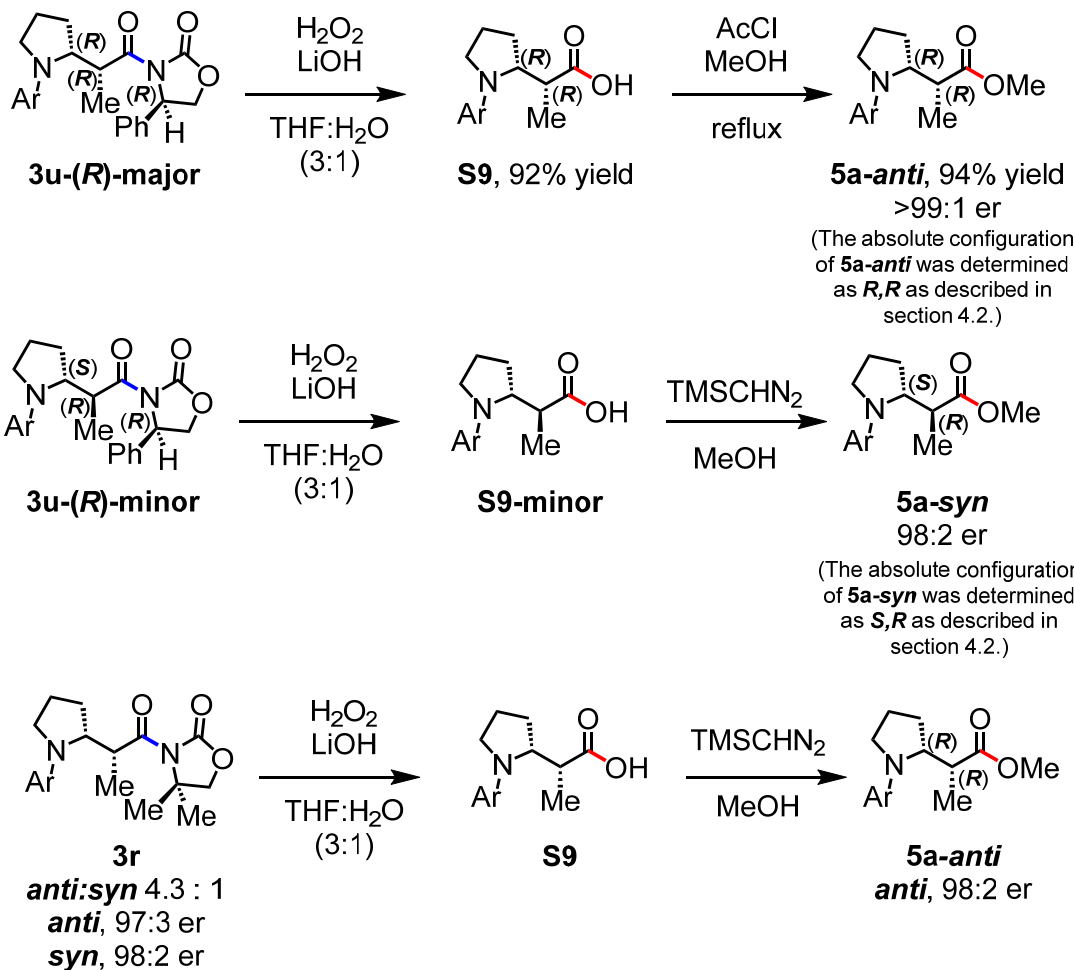

#### **(R)-2-((R)-1-(4-Methoxy-2,6-dimethylphenyl)pyrrolidin-2-yl)propanoic acid (S9)**

(*R*)-2-((*R*)-1-(4-Methoxy-2,6-dimethylphenyl)pyrrolidin-2-yl)propanoic acid was prepared by following a known procedure.<sup>19</sup> To a solution of Mannich product **3u-(R)-major** (169 mg, 0.4 mmol) in THF:H<sub>2</sub>O (3:1, 4.8 mL) at 0 °C was added H<sub>2</sub>O<sub>2</sub> (30% v/v, 0.16 mL, 1.6 mmol) and 2 M LiOH (0.28 mL, 0.56 mmol), dropwise. The mixture was stirred at 22 °C for 5 h, whereupon the reaction was quenched with NaHSO<sub>3</sub>. The crude mixture was then concentrated *in vacuo*, then diluted with EtOAc (10 mL), H<sub>2</sub>O (10 mL), and 1 M NaOH (5 mL). The organic layer was separated and the aqueous layer was extracted with EtOAc (3 x





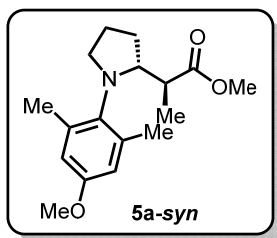

**5a-syn** from **3u-(R)-minor**: HPLC (Chiralpak IC then Chiralcel OJ-H; 1%/ 99% isopropanol/ hexanes, 0.5 mL/min; tr = 30.9 min (major), 32.6 min (minor); 98:2 er.

```

Acq. Operator   : SYSTEM                      Seq. Line :    3
Acq. Instrument : Wasa_LC1                   Location  :   42
Injection Date  : 10/28/2017 4:40:15 PM      Inj       :    1
                                           Inj Volume: 8.000 µl
Method          : C:\Chem32\1\Data\JOE 2017-10-28 14-56-02\column2 1% IPA 99% hexane 50min-0.5mL.M (Sequence Method)
Last changed    : 10/28/2017 2:56:04 PM by SYSTEM
Method Info     : Column2 50min-1% iPrOH 99% hexane-0.5mL
  
```

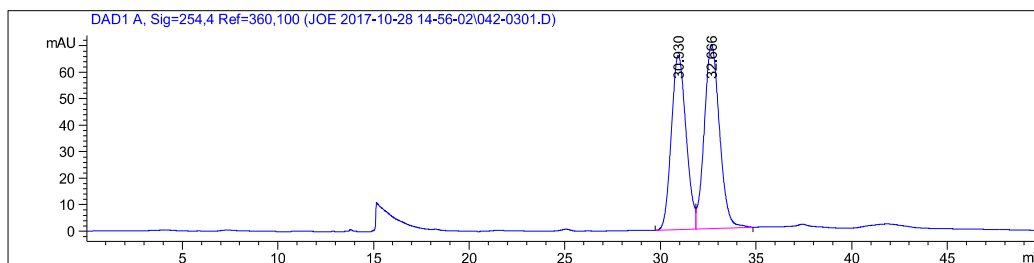

Signal 1: DAD1 A, Sig=254,4 Ref=360,100

| Peak # | RetTime [min] | Type | Width [min] | Area [mAU*s] | Height [mAU] | Area %  |
|--------|---------------|------|-------------|--------------|--------------|---------|
| 1      | 30.930        | BV   | 0.8350      | 3518.35767   | 65.67362     | 47.7326 |
| 2      | 32.666        | VB   | 0.8595      | 3852.61475   | 69.41617     | 52.2674 |





Product **5a**, derived from **3r**, was isolated as a mixture of diastereomers. The following is the HPLC trace for the mixture of **5a-anti** and **5a-syn**.

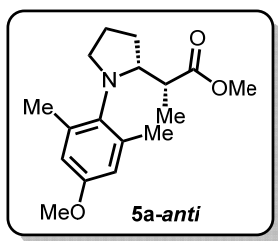

**5a-anti (from 3r): HPLC** (Chiralpak IC then Chiralcel OJ-H; 1%/ 99% isopropanol/ hexanes, 0.5 mL/min; **5a-anti**: tr = 33.3 min (major), 42.0 min (minor); 98:2 er.

```

Acq. Operator   : SYSTEM                      Seq. Line :    2
Acq. Instrument : Wasa_LC1                    Location  :   11
Injection Date  : 10/11/2017 4:19:51 PM      Inj       :    1
                                                    Inj Volume: 2.000 µl
Method          : C:\Chem32\1\Data\JOE 2017-10-11 15-27-57\column2 1% IPA 99% hexane 50min-0.5mL.M (Sequence Method)
Last changed    : 10/11/2017 3:27:59 PM by SYSTEM
Method Info     : Column2 50min-1% iPrOH 99% hexane-0.5mL
  
```

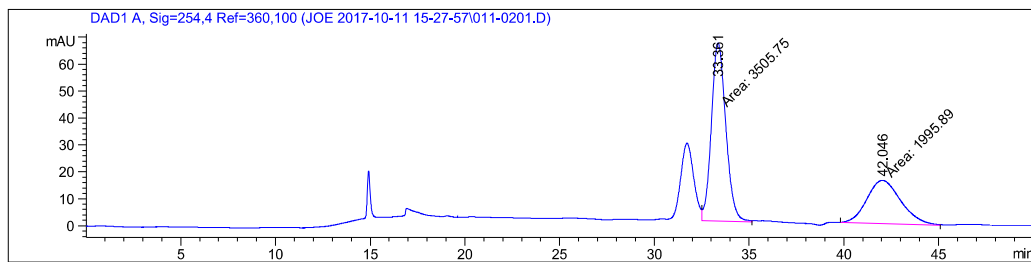

Signal 1: DAD1 A, Sig=254,4 Ref=360,100

| Peak # | RetTime [min] | Type | Width [min] | Area [mAU*s] | Height [mAU] | Area %  |
|--------|---------------|------|-------------|--------------|--------------|---------|
| 1      | 33.361        | FM   | 0.8837      | 3505.75146   | 66.12045     | 63.7219 |
| 2      | 42.046        | MM   | 2.0717      | 1995.89001   | 16.05654     | 36.2781 |





**Procedure for the Removal of the Chiral Auxiliary to obtain Amino Alcohol 5c**

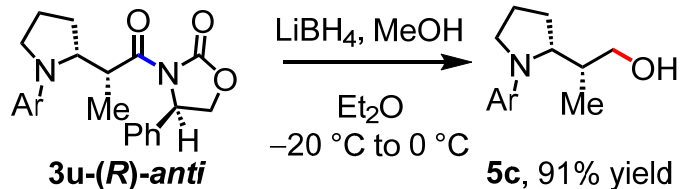

**(R)-2-((R)-1-(4-Mmethoxy-2,6-dimethylphenyl)pyrrolidin-2-yl)propan-1-ol (5c)**

(R)-2-((R)-1-(4-Mmethoxy-2,6-dimethylphenyl)pyrrolidin-2-yl)propan-1-ol (**5c**) was prepared using a known procedure.<sup>24</sup> A solution of LiBH<sub>4</sub> in THF (2 M, 0.15 mL, 0.3 mmol) was added to a solution of imide **3u-(R)-anti** (85 mg, 0.2 mmol) in Et<sub>2</sub>O (2.0 mL) under N<sub>2</sub> atmosphere at -20 °C. Subsequently, MeOH (0.3 mmol) was added dropwise at -20 °C. The reaction mixture was then allowed to stir at 0 °C for 1 h. Upon completion of the reaction (monitored by TLC), aq. NaHCO<sub>3</sub> (2 mL) was added slowly and was extracted with EtOAc (3 x 5 mL). The combined organic layers were dried (MgSO<sub>4</sub>), filtered, and concentrated *in vacuo*. The crude product was purified by silica gel column chromatography (3:1 Hexanes: Et<sub>2</sub>O) to afford **5c** as a colorless solid (48 mg, 91% yield).

<sup>1</sup>H NMR (600 MHz, CDCl<sub>3</sub>) δ 6.58 (s, 1H), 6.53 (s, 1H), 3.74 (s, 3H), 3.70 – 3.59 (m, 1H), 3.49 – 3.33 (m, 2H), 3.27 (ddd, *J* = 11.7, 5.7, 3.6 Hz, 1H), 2.98 (q, *J* = 7.8 Hz, 1H), 2.30 (s, 3H), 2.24 (s, 3H), 2.01 – 1.84 (m, 3H), 1.82 – 1.67 (m, 1H), 1.57 (dt, *J* = 6.5, 3.3 Hz, 1H), 1.30 (s, 1H), 0.90 (dd, *J* = 6.9, 1.1 Hz, 3H); <sup>13</sup>C NMR (151 MHz, CDCl<sub>3</sub>) δ 156.37, 140.26, 138.58, 137.74, 114.65, 113.16, 66.70, 62.12, 55.11, 52.43, 40.16, 27.26, 25.47, 19.63, 19.33, 12.24; HPLC (Chiralpak AD-H; 2.5%/ 98.5% isopropanol/ hexanes, 0.5 mL/min; **5c**: tr = 29.6 min (minor), 33.4 min (major); >99:1 er.

```

Acq. Operator   : SYSTEM                               Seq. Line :    2
Acq. Instrument : Wasa_LC1                             Location  :    3
Injection Date  : 1/9/2018 8:29:07 PM                  Inj       :    1
                                                    Inj Volume: 4.000 µl
Method          : C:\Chem32\1\Data\JOE 2018-01-09 19-25-54\column1 2.5% IPA 97.5% hex 60min-0
                  .5mL.M (Sequence Method)
Last changed    : 1/9/2018 7:25:56 PM by SYSTEM
Method Info     : Washing 40min-2.5% iPrOH 97.5% hexane-0.5mL
    
```



### Procedure for the Removal of the *para*-Methoxyphenyl Group

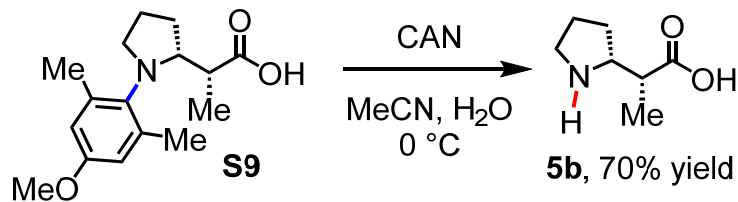

#### **(R)-2-((R)-Pyrrolidin-2-yl)propanoic acid (5b)**

(*R*)-2-((*R*)-Pyrrolidin-2-yl)propanoic acid (**5b**) was prepared using a known procedure.<sup>25</sup> A solution of ceric ammonium nitrate (CAN, 548 mg, 1.0 mmol) in H<sub>2</sub>O (3.3 mL, 0.3 M to CAN) was added to a solution of propanoic acid **S9** (55.5 mg, 0.2 mmol) in MeCN (2 mL) at 0 °C under N<sub>2</sub> atmosphere. The mixture was stirred at 0 °C for 1 h, whereupon the reaction was diluted with EtOAc (2 mL) then concentrated *in vacuo* to remove volatile side products and solvent (H<sub>2</sub>O was evaporated by azeotropic distillation with toluene). The solid residue was then filtered over a pad of Celite using EtOAc as the eluent. The filtrate was concentrated to afford **5b** as a solid (19.9 mg, 70% yield). <sup>1</sup>H NMR (500 MHz, D<sub>2</sub>O) δ 3.75 (q, *J* = 9.1 Hz, 1H), 3.36 (dt, *J* = 19.6, 11.4 Hz, 2H), 2.90 (ddt, *J* = 13.5, 8.5, 4.1 Hz, 1H), 2.33 (td, *J* = 7.6, 7.1, 3.8 Hz, 1H), 2.17 – 2.07 (m, 1H), 2.01 (dt, *J* = 14.0, 8.4 Hz, 1H), 1.84 – 1.70 (m, 1H), 1.35 (dd, *J* = 7.2, 2.0 Hz, 3H).

### 4.5 Effect of Mg(OTf)<sub>2</sub>/L4 Co-Catalyst in the Diastereoselective C–C Bond Forming Reactions

#### Experimental Procedure

An oven-dried sealed tube equipped with a magnetic stir bar was used. Amine **1** (0.20 mmol), (*R*)-3-acryloyl-4-phenyloxazolidin-2-one **2u-(R)** (0.24 mmol), B(C<sub>6</sub>F<sub>5</sub>)<sub>3</sub> (0.02 mmol), and DCM (0.3 mL) were added under nitrogen atmosphere. The reaction mixture was stirred at 22 °C for 12 h. Upon completion, the reaction mixture was concentrated *in vacuo*. The product yield was determined by the <sup>1</sup>H NMR analysis of the crude product using mesitylene as the internal standard.

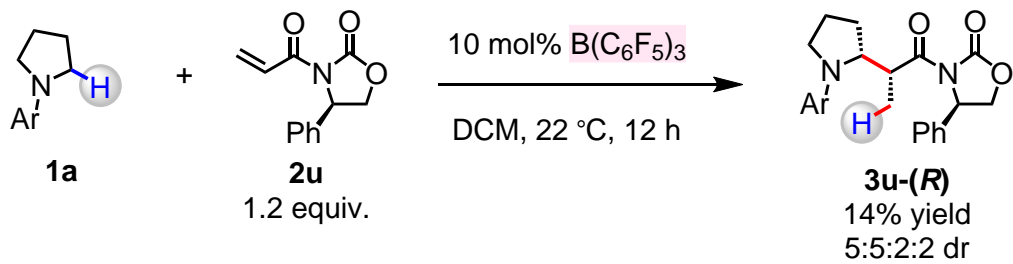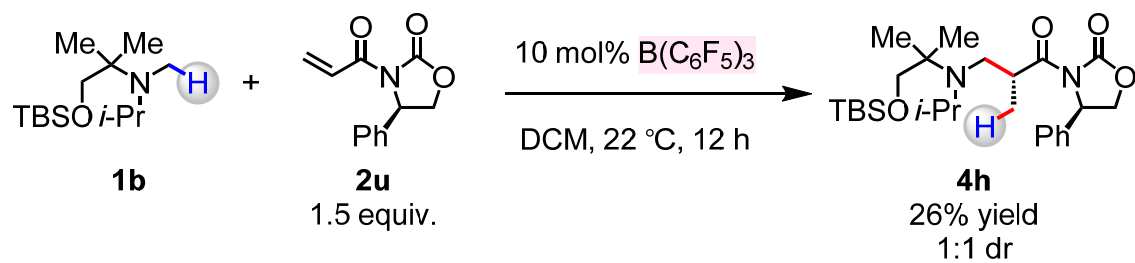

## 5. Kinetics Experiment Data for B(C<sub>6</sub>F<sub>5</sub>)<sub>3</sub>-Catalyzed C–C Bond Forming

### Reactions

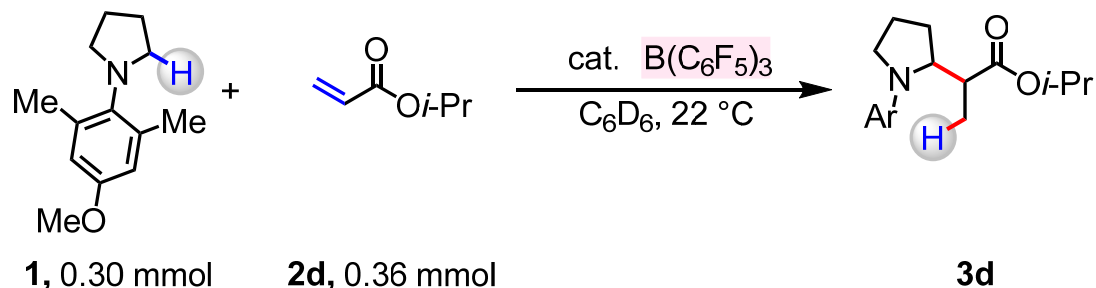

### General Procedure for time course reaction monitoring by *in situ* <sup>1</sup>H NMR

In a nitrogen-filled glove box, 1-(4-methoxy-2,6-dimethylphenyl)pyrrolidine (400 mg, 1.95 mmol), isopropyl acrylate (269 mg, 2.3 mmol), mesitylene (235 mg, 1.95 mmol), was weighed in a 20 mL dram vial, which was dissolved in C<sub>6</sub>D<sub>6</sub> (1.63 mL, Stock Solution A). In another 20 mL dram vial, B(C<sub>6</sub>F<sub>5</sub>)<sub>3</sub> (0.125 mmol) was weighed and dissolved in C<sub>6</sub>D<sub>6</sub> (1.5 mL, Stock Solution B). Using stock solutions A and B and neat C<sub>6</sub>D<sub>6</sub> (in total of 0.6 mL), reaction mixtures with 0.3 mmol of 1-(4-methoxy-2,6-dimethylphenyl)pyrrolidine and the following amount of B(C<sub>6</sub>F<sub>5</sub>)<sub>3</sub> were prepared (2.50, 3.75, 5.00, 6.25, 7.50, and 8.75 mol%) and placed in a J-Young tube. After the J-Young tube was tightly capped with the Teflon plug, <sup>1</sup>H NMR spectra were acquired using a pre-acquisition delay in array mode, with a spectrum taken every 30 seconds for the length of the experiment. The data were processed using MestReNova and peak integrations were normalized using mesitylene as the internal standard.

A study was conducted following the procedure for time course reaction monitoring by <sup>1</sup>H NMR (using internal standard) while varying [B(C<sub>6</sub>F<sub>5</sub>)<sub>3</sub>] in order to find the order of the catalyst in the reaction.<sup>26,27</sup>



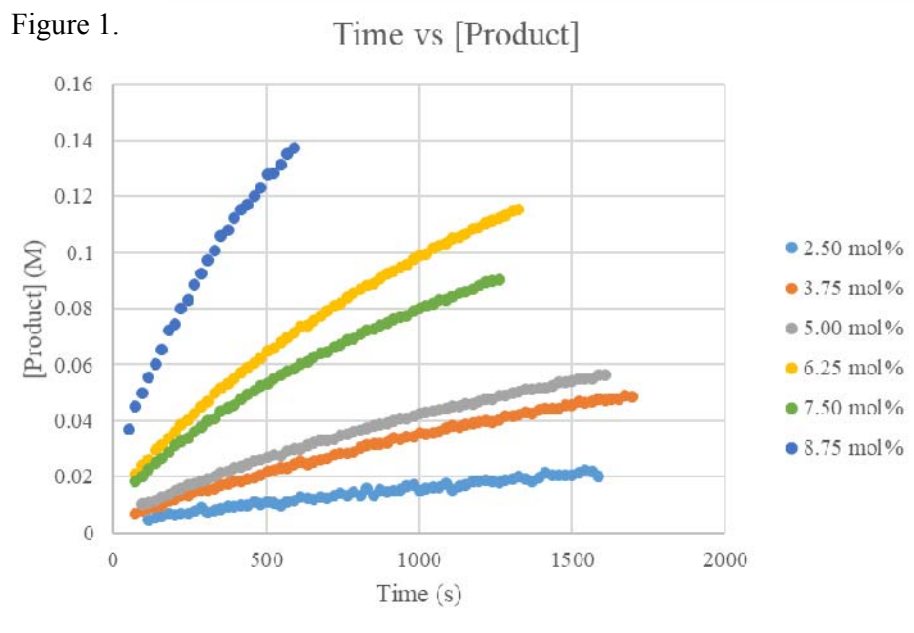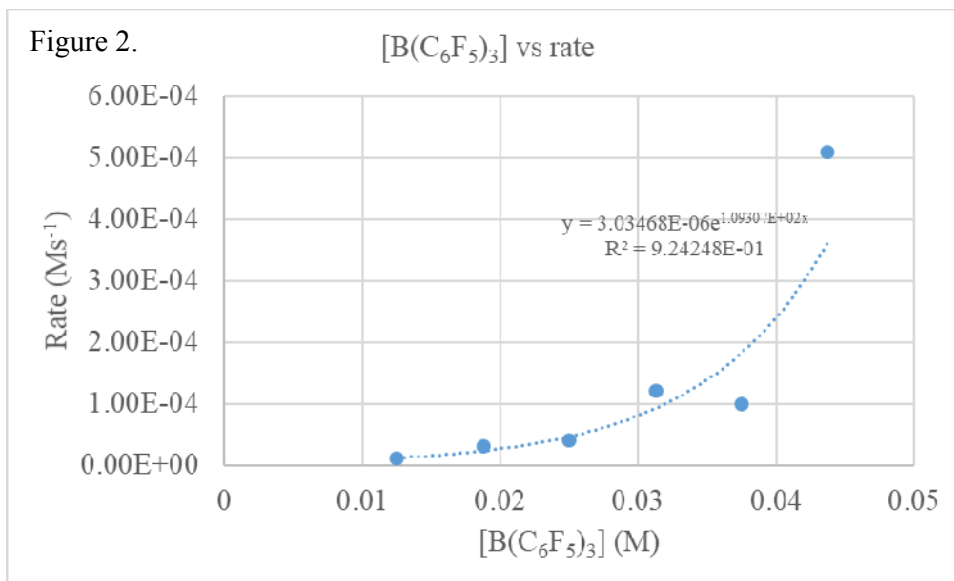

Figure 3.

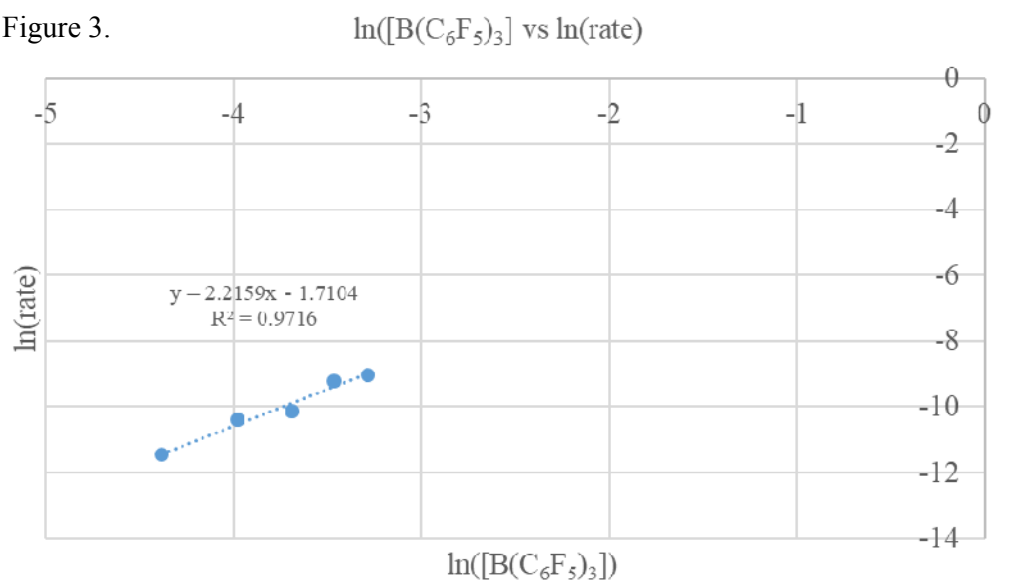

Figure 4.

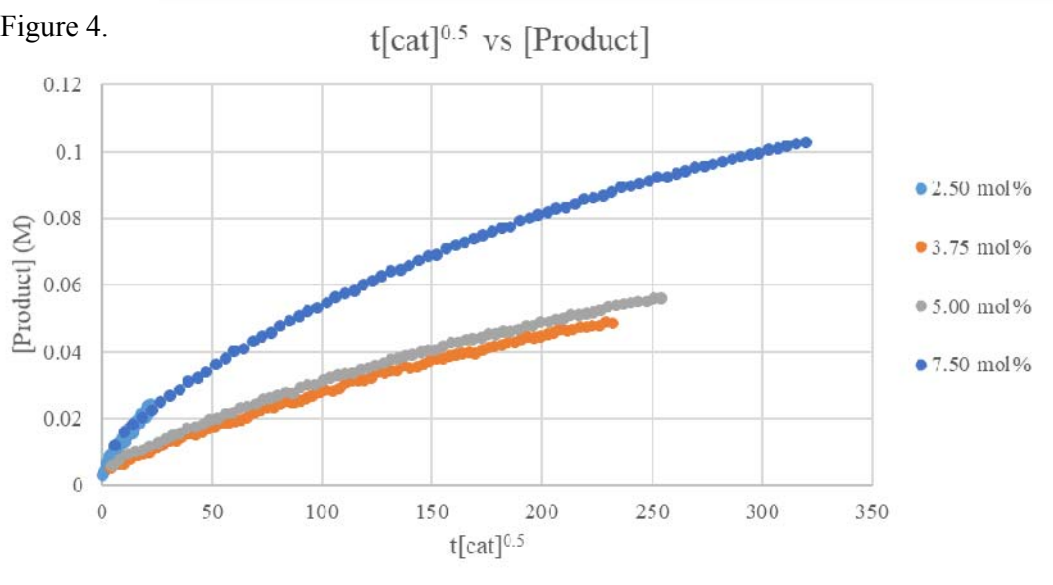

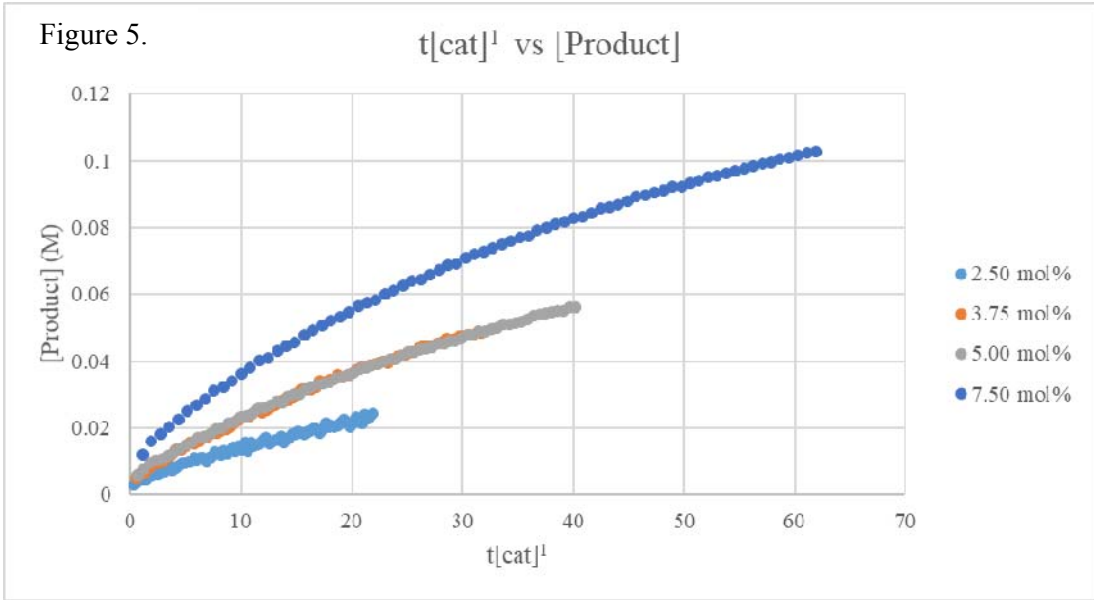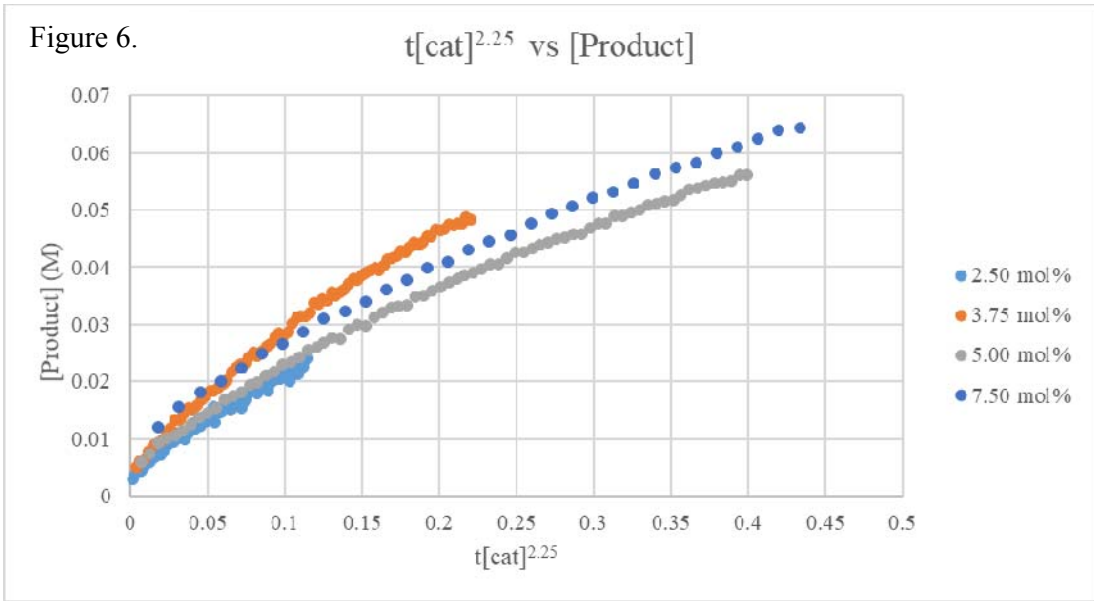

## 6. Density Functional Theory (DFT) Calculations

DFT computations<sup>28</sup> were performed with the Gaussian 09 suite of programs.<sup>29</sup> Geometries were optimized with the M06L<sup>30</sup> functional and the def2-SVP basis set<sup>31</sup> in conjunction with the corresponding Coulomb fitting basis set to speed up calculations (denoted DF; density fitting).<sup>32</sup> An ultrafine integration grid was applied. The effect of a polar reaction medium (dichloromethane, DCM) was approximated by means of an integral equation formalism variant of the polarizable continuum model (IEFPCM).<sup>33</sup> Stationary points were probed through vibrational analysis and Gibbs free energy corrections were performed under standard conditions (298.15 K, 1.0 atm). Additionally, we probed the performance of various density functionals through single-point energy calculations at the geometries optimized with the level described above by means of the SMD<sup>34</sup> solvation model with DCM as solvent and the larger def2-TZVPP basis set.<sup>31</sup> Since the correct density functional is not known we tested several state of the art approaches that have been developed over the past decade, all of which are have been designed to account for dispersion:<sup>28,35</sup> M06L,<sup>30</sup> M06,<sup>30</sup> MN15,<sup>28i</sup>  $\omega$ B97XD<sup>36</sup> and PBE0-D3BJ.<sup>28b,37</sup> Additionally, results with the corresponding parent functionals  $\omega$ B97X and PBE0<sup>28b</sup> are included. In the manuscript we only report the M06L/def2-TZVPP<sub>DCM(SMD)</sub>//M06L/DF-def2-SVP<sub>DCM(IEFPCM)</sub> energies and the comparison of other density functionals is provided in Figures S4-S12. Images of computed geometries are shown in Figures S1–S3 and a file for convenient viewing of computed geometries with the program Mercury 3.3 is appended as separate “coordinates.xyz” file in SI Section 9.<sup>38</sup>

### 6.1 Challenges and Simplifications

- (a) All transition state calculations have been carried out in absence of the triflate counterions, rendering the overall charge of the transition state structures +2 (Figure S1). Furthermore, the solvent has been approximated by a continuum and it is assumed that the M06L/DF-def2-SVP<sub>DCM(IEFPCM)</sub> optimized structures are an appropriate reflection of the geometry in solution. Nonetheless, the exact solution geometry is likely unknown.

- (b) Initial scans of the potential energy surface have revealed a very flat region for C–C distances between 2.2 and 2.6 Å and attempts to locate a transition state were unsuccessful in most instances. We hence decided to perform a number of constrained optimizations in 0.03–0.10 Å intervals (Figures S4–S8), including the assessment of thermal corrections to the free energy ( $G_{\text{corr}}$ ; see Figure S4c). The largest energy values from Figures S4–S8 have been used in the comparison of various density functionals (Figures S9–S12).
- (c) The stereochemical model under investigation resembles molecular balance experiments designed to assess the contribution of dispersion interactions in solution.<sup>39,40</sup> The challenge here lies in the accurate comparison of two kinds of molecular assemblies: that is, in some structures dispersion is a dominant contributor to the interaction energy (for example, **IX'** and **X'**; Figure S1), whereas dispersion interactions are much less pronounced in alternative geometries (for example, **XI** and **XII**; Figure S1).
- (d) Accurate electronic energies are likely not sufficient in assessing the relative energies of **IX–XII**. Equally important are thermal/entropic contributions ( $G_{\text{corr}} = \Delta G - \Delta E$ ; see Figure S4c). The large  $G_{\text{corr}}$ -values for **IX'** and **X'** (22–23 kcal/mol) are expected and are likely the result from significantly reduced vibrational freedom due to the close alignment between the aryl ring of the substrate and the ligand. It is, however, much less clear why the  $G_{\text{corr}}$ -values for structures **IX**, **X**, **XI** and **XII** fluctuate between 17–20 kcal/mol. We assume an error bar of 1–2 kcal/mol, particularly since  $G_{\text{corr}}$ -values for the immediate sphere of solvent molecules, which has not been explicitly modeled, are unknown.
- (e) To assess the error due to basis set incompleteness associated with the def2-TZVPP basis set we performed additional single point calculations with M06L/DF-def2-QZVPP<sub>DCM(SMD)</sub>. The energies relative to the separate iminium ion and Z-enolate complex increased by less than 0.3 kcal/mol, suggesting that the def2-TZVPP basis set is of sufficient quality.

## 6.2 The Stereochemical Model

An extended stereochemical model (than the one provided in the manuscript) for reaction of **L3**–Mg-enolate complex with the *in situ* generated iminium ion is shown in Figure S1 and the computed electronic ( $\Delta E$ ) and free energies ( $\Delta G$ ) at the M06L/DF-def2-TZVPP<sub>DCM(SMD)</sub>//M06L/DF-def2-SVP<sub>DCM(IEFPCM)</sub> level of theory are provided in Figure S2. In addition to the four modes shown in the manuscript (**IX–XII**), we considered two additional modes that lead to the minor diastereomer (i.e., **IX'** and **X'**), wherein the iminium ion is approaching the enolate nucleophile with its aryl ring pointing up. It appears that accurate determination of free energy values is challenging and will strongly depend on the attenuation of dispersion interactions in solution<sup>39,40</sup>. For instance, we find that functionals accounting for dispersion (e.g., M06–L) clearly favor pathway **IX'** over **XI** electronically ( $\Delta E$  values), particularly with the small def2-SVP basis set applied during geometry optimization (–8.8 vs –5.0 kcal/mol; grey curve in Figure S2). While correcting for basis set incompleteness reduces the energy difference to 2.0 kcal/mol (–3.3 vs –1.3 kcal/mol; red curve in Figure S2), it is only after addition of thermal corrections ( $\Delta G = \Delta E + G_{\text{corr}}$ ) when **XI** becomes the most favorable mode of addition (19.1 vs 18.1 kcal/mol; blue curve in Figure S2).

## 6.3 Steric Influence of the *para*-Substituent on the Substrate on Diastereoselectivity

Based on these large fluctuations in the relative energy between pathways **IX'** and **XI** we decided to test experimentally the influence of substituent R on diastereoselectivity (Figure S3a). We hypothesized that increasing the size of R would lead to destabilization of mode **IX'** and result in an increase in d.r. We indeed observed a minor effect when R is altered from H to *tert*-butyl (3.8:1.0 vs 4.4:1.0 d.r.), although this change is likely too small to render **IX'** the major pathway for generation of the minor diastereomer. In addition to these experimental trends we investigated the effect of a more sizable *tert*-butyl group on the relative energy between **IX'** and **XI** computationally (labeled as **IX'**<sub>*t*-Bu</sub> and **XI**<sub>*t*-Bu</sub>; Figure S3b). While the electronic energy ( $\Delta E$ ) of **IX'** is 2.0 kcal/mol lower than for **XI** (R = OMe), **IX'**<sub>*t*-Bu</sub> is destabilized by 0.8 kcal/mol relative to **XI**<sub>*t*-Bu</sub>. A side view of the corresponding

transition state structures for **IX'** and **IX'**<sub>*t*-Bu</sub> illustrates the significantly increased steric demand in the latter structure. This is reflected in the longer distance between C<sup>2</sup> on the substrate and C<sup>1</sup> on the ligand in **IX'**<sub>*t*-Bu</sub> (3.65 Å; Figure S2), as opposed to **IX'** (3.15 Å).

On the basis of these results we propose that the minor diastereomer is generated through a combination of pathways **IX'** and **IX**, with **IX** likely being favored, otherwise a much more pronounced effect on diastereoselectivity would be expected.

#### 6.4 Comparison of Results with Various Density Functionals

A comparison of electronic energies ( $\Delta E$ ) with a range of density functionals is provided in Figures S9–S10, the corresponding free energy values are shown in Figures S11–S12. Various state of the art methods (M06L, M06, MN15,  $\omega$ B97XD and PBE0-D3BJ) yield similar electronic energies relative to the separate iminium ion and Z-enolate complex (Figure S9–S10), while  $\Delta E$ -values are significantly larger with density functionals that do not properly account for dispersion ( $\omega$ B97X and PBE0). It is worth mentioning that the electronic energy of **IX'** is predicted to be lower than that of **XI** by approximately 3 kcal/mol with functionals M06L, M06, MN15,  $\omega$ B97XD and PBE0-D3BJ (Figure S10), whereas **IX'** is destabilized relative to **XI** by approximately 3 kcal/mol with  $\omega$ B97X and PBE0 (Figure S9). These data indicate that dispersion terms (D) contribute about 6 kcal/mol to the stabilization of **IX'** relative to **XI**. After addition of thermal contributions ( $G_{\text{corr}}$ ; cf. Figure S4c) the energy values for **IX'** and **XI** are of similar magnitude with functionals M06L, M06, MN15,  $\omega$ B97XD and PBE0-D3BJ (Figure S12). Based on these results and considering the expected error bar associated with density functionals ( $>1$ – $2$  kcal/mol),<sup>28</sup> we chose to report the single point energies with M06-L, which is also the method used during geometry optimization.

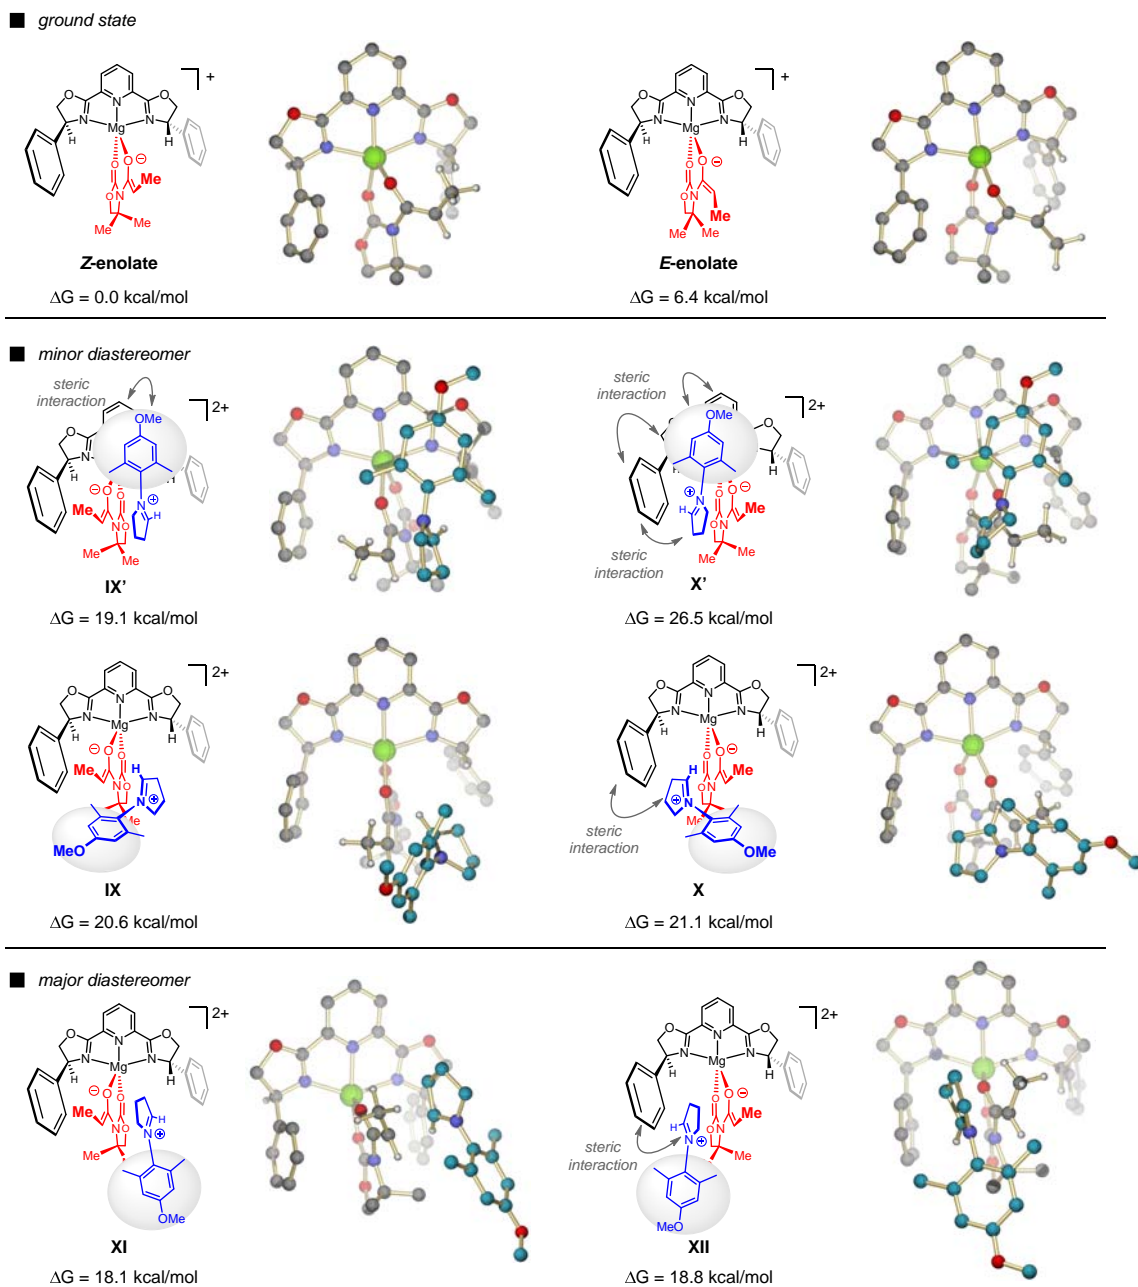

**Figure S1.** Geometries of computed structures [M06L/DF-def2-SVP<sub>DCM(IEFPCM)</sub>] including free energy values obtained at the M06L/DF-def2-TZVPP<sub>DCM(SMD)</sub>//M06L/DF-def2-SVP<sub>DCM(IEFPCM)</sub> level of theory; the C–C distance between the electrophilic carbon on the iminium and the nucleophilic carbon on the enolate has been constrained to 2.3 Å.



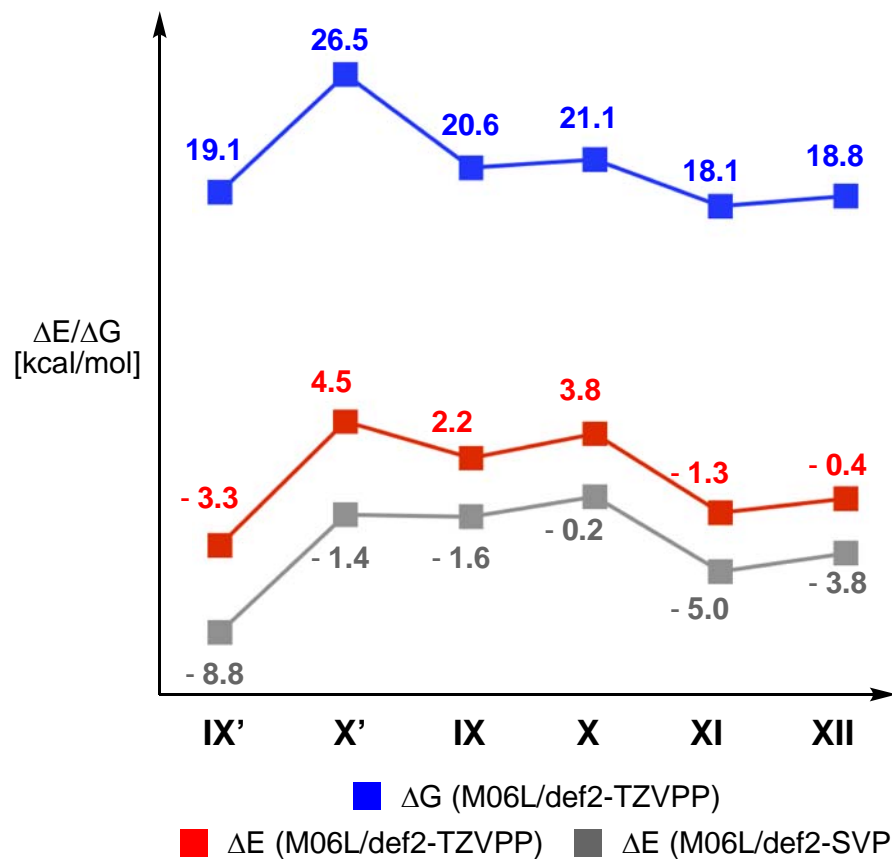

**Figure S2.** Comparison of electronic and free energies for transition states IX'–XII obtained at the M06L/DF-def2-TZVPP<sub>DCM(SMD)</sub>//M06L/DF-def2-SVP<sub>DCM(IEFPCM)</sub> level of theory.

a Experimentally observed influence of the size of the *para* substituent on the substrate on diastereoselectivity

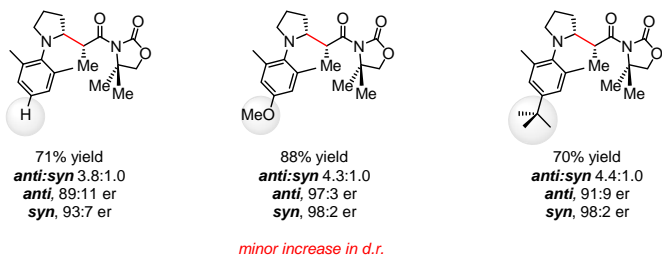

b Computationally investigated influence of a *tert*-butyl group in *para* position of the substrate on diastereoselectivity

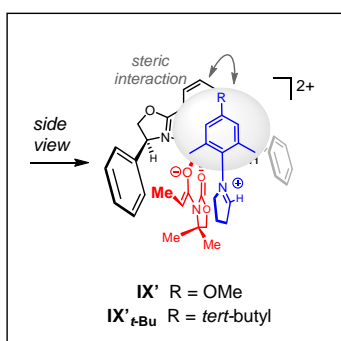

a structure of IX' (R = OMe)

front view

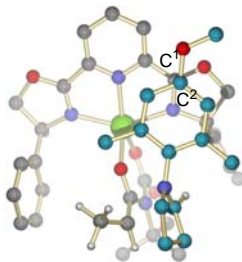

side view

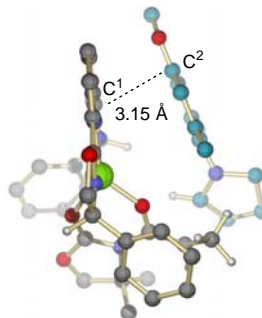

energy relative to XI  
ΔE: -2.0 kcal/mol  
ΔG: 1.0 kcal/mol

b structure of IX'<sub>t-Bu</sub> (R = *tert*-butyl)

front view

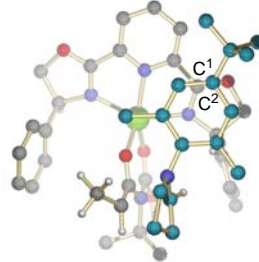

side view

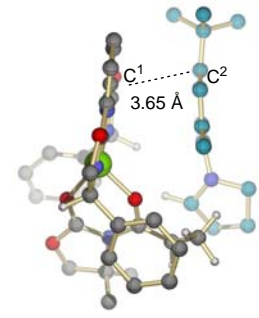

energy relative to XI<sub>t-Bu</sub>  
ΔE: 0.8 kcal/mol  
ΔG: 3.8 kcal/mol

Carbon atoms used to determine the C<sup>1</sup>-C<sup>2</sup> distance:

- C<sup>1</sup> carbon atom on oxazole ring between O and N
- C<sup>2</sup> carbon atom in *para* position of the aryl group on the substrate

**Figure S3.** Influence of the *para*-substituent on the substrate on the relative energy between IX' and XI; electronic and free energies have been assessed at the M06L/DF-def2-TZVPP<sub>DCM(SMD)</sub>//M06L/DF-def2-SVP<sub>DCM(IEFPCM)</sub> level of theory; the C-C distance between the electrophilic carbon on the iminium and the nucleophilic carbon on the enolate has been constrained to 2.3 Å.

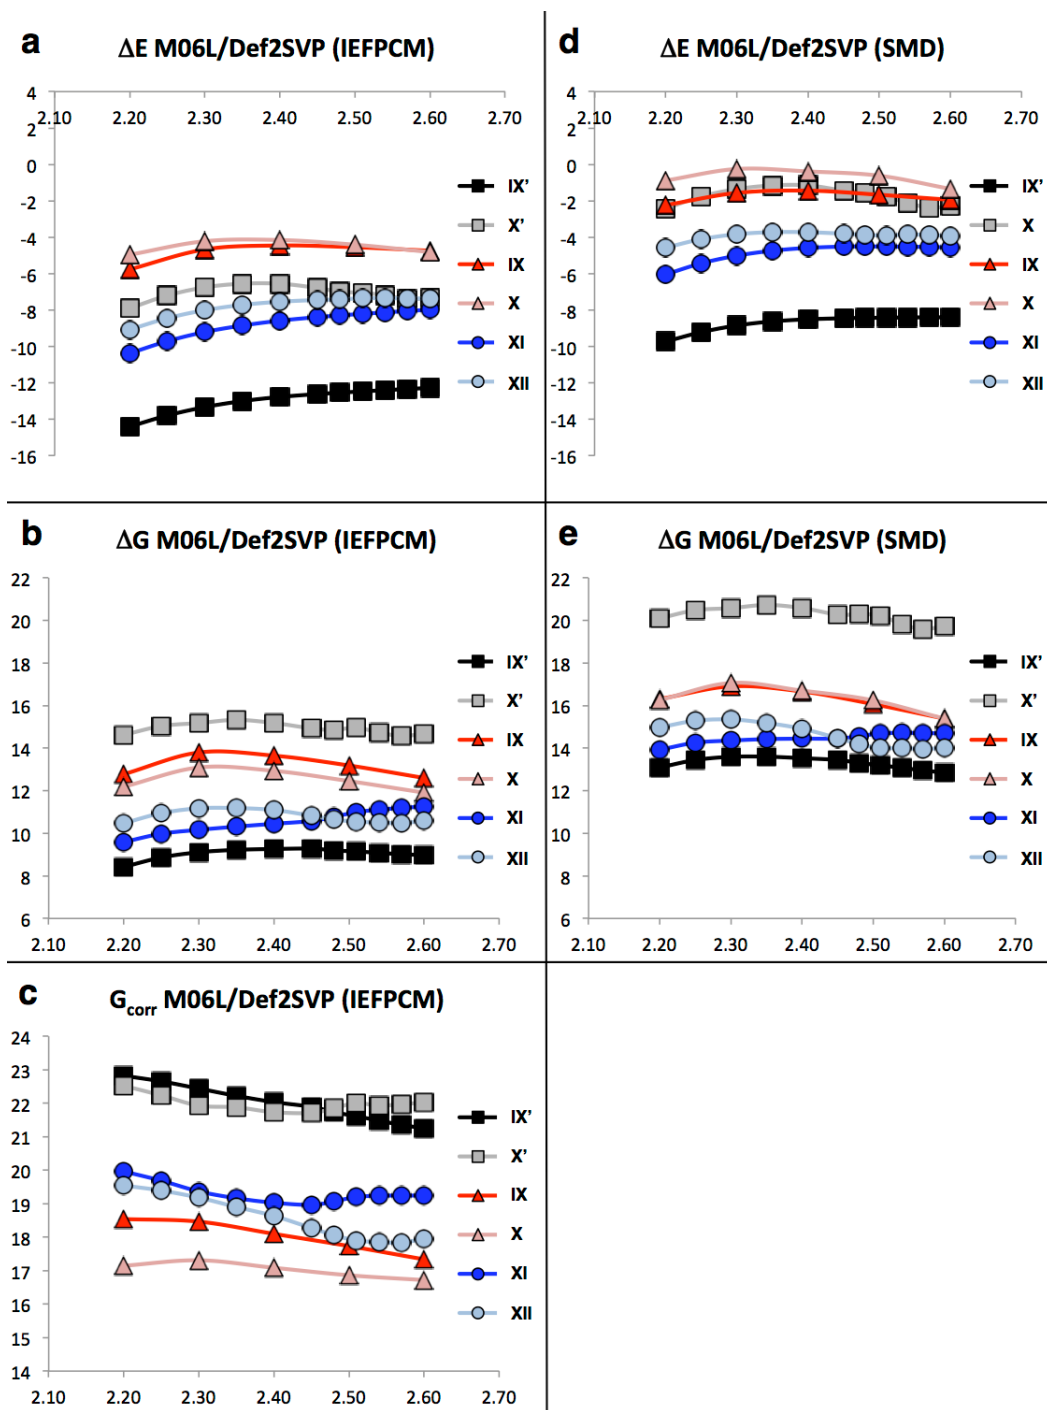

**Figure S4.** (a) Electronic energies ( $\Delta E$ ), (b) free energies ( $\Delta G$ ) and (c) thermal corrections to the free energy ( $G_{\text{corr}}$ ) at the level of optimization [M06L/DF-def2-SVP<sub>DCM(IEFPCM)</sub>] as a function of the C–C distance [Å] and (d,e) single point energies with the SMD solvation model [M06L/DF-def2-SVP<sub>DCM(SMD)</sub>];  $\Delta G = \Delta E + G_{\text{corr}}$ .

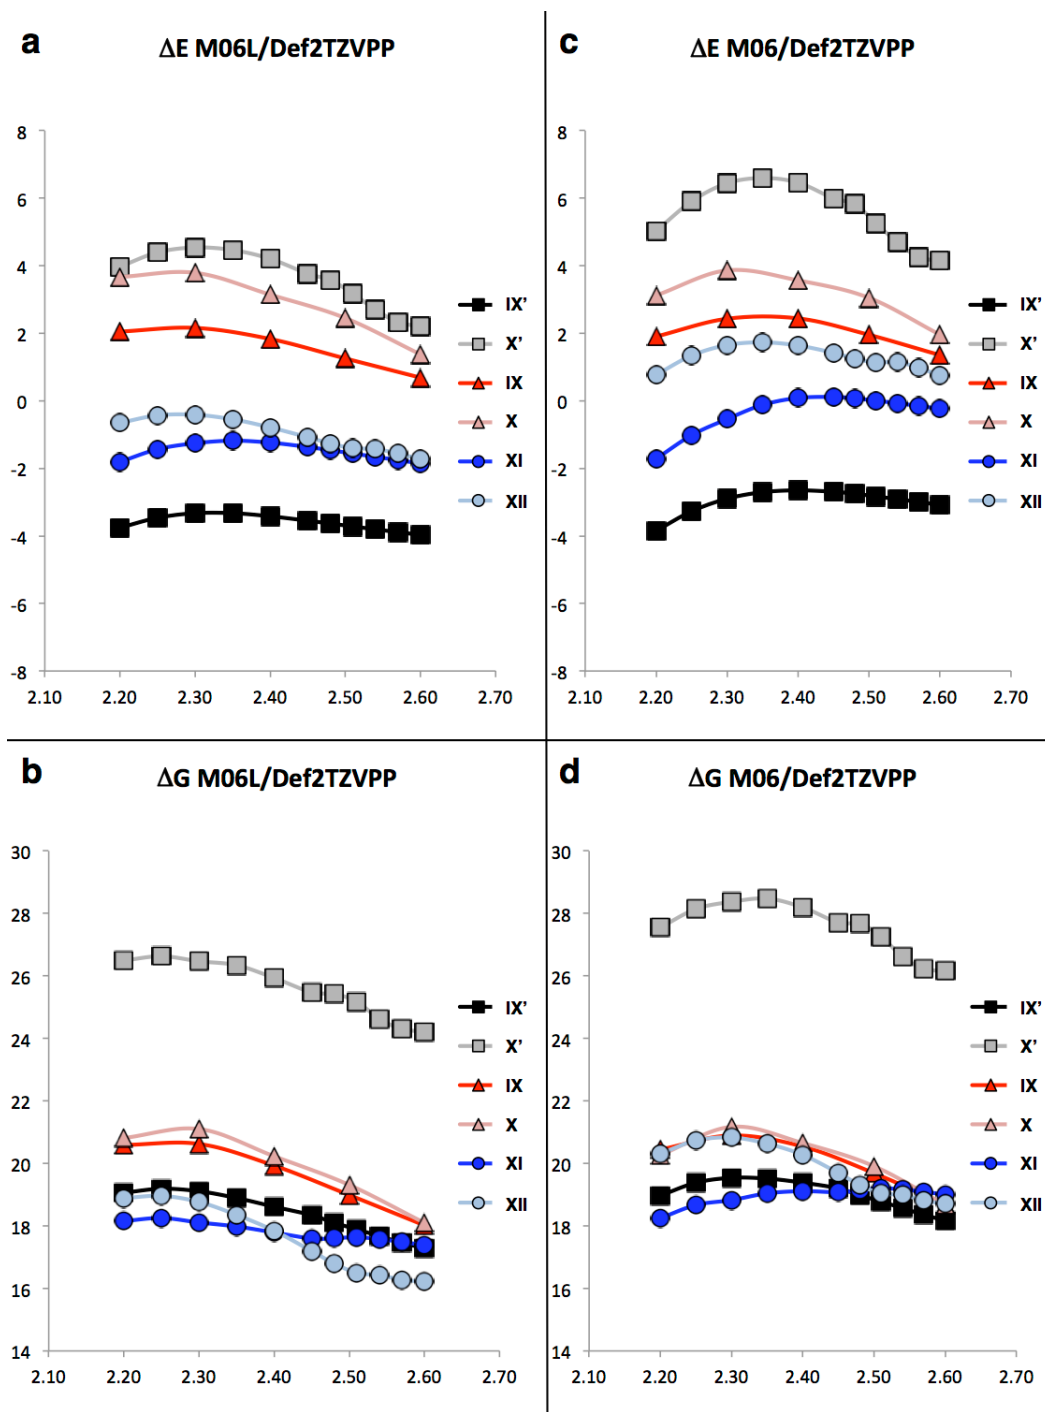

**Figure S5.** (a,b) Single point electronic energies ( $\Delta E$ ) and free energies ( $\Delta G$ ) at the M06L/DF-def2-TZVPP<sub>DCM(SMD)</sub> level as a function of the C–C distance [Å]; (c,d) single point electronic energies ( $\Delta E$ ) and free energies ( $\Delta G$ ) at the M06/def2-TZVPP<sub>DCM(SMD)</sub> level as a function of the C–C distance [Å];  $\Delta G = \Delta E + G_{\text{corr}}$ .

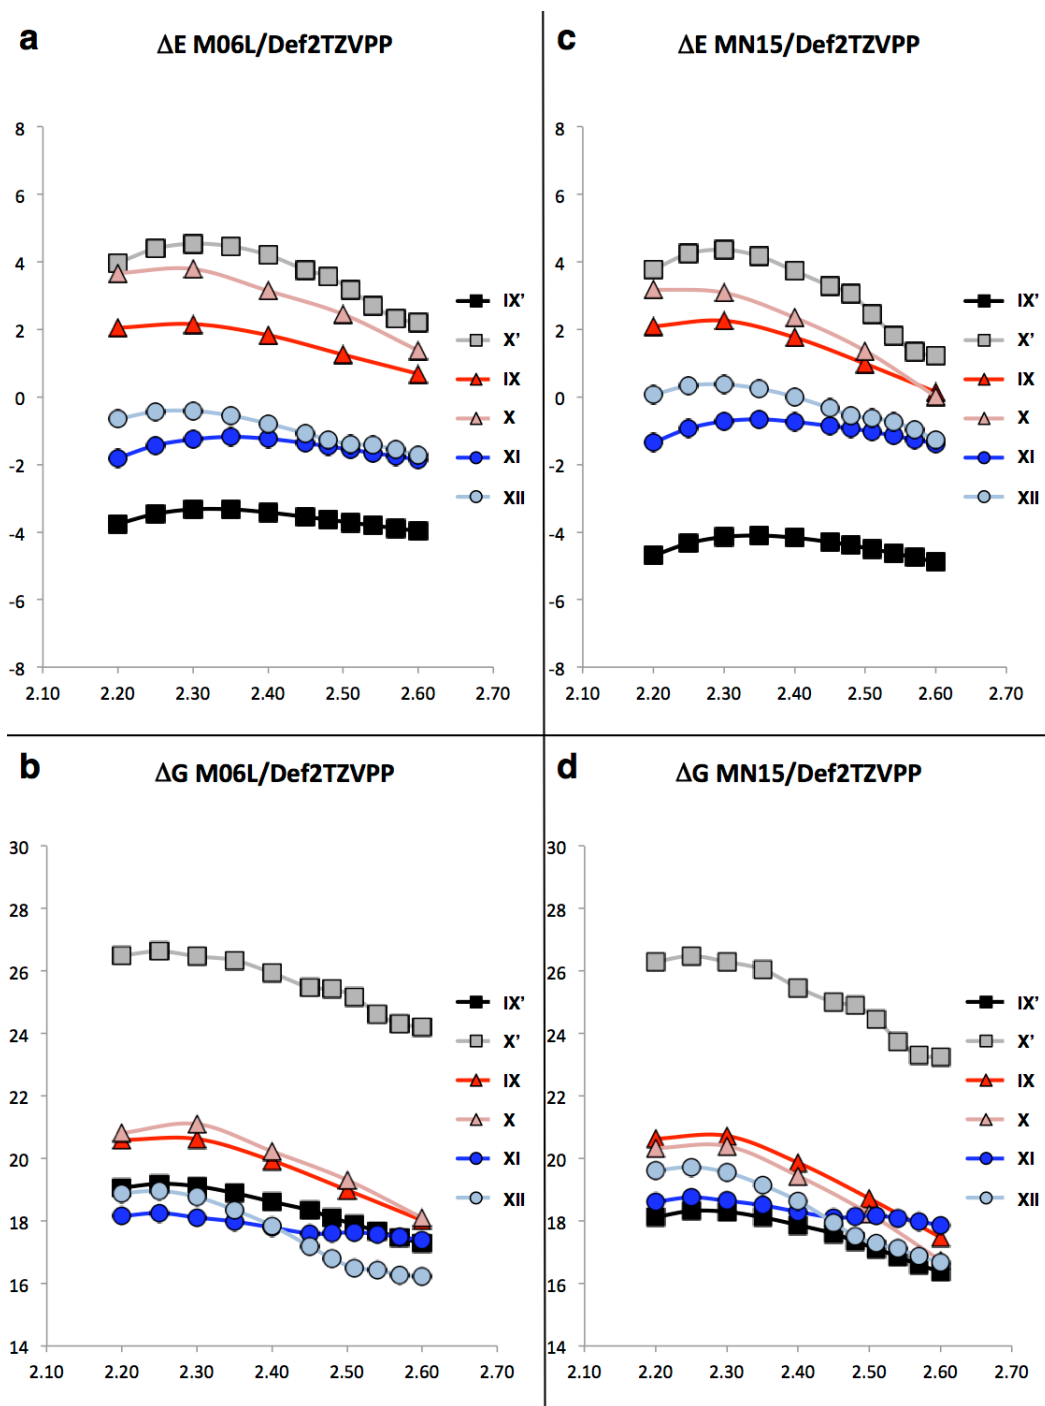

**Figure S6.** (a,b) Single point electronic energies ( $\Delta E$ ) and free energies ( $\Delta G$ ) at the M06L/DF-def2-TZVPP<sub>DCM(SMD)</sub> level as a function of the C–C distance [ $\text{\AA}$ ]; (c,d) single point electronic energies ( $\Delta E$ ) and free energies ( $\Delta G$ ) at the MN15/def2-TZVPP<sub>DCM(SMD)</sub> level as a function of the C–C distance [ $\text{\AA}$ ];  $\Delta G = \Delta E + G_{\text{corr}}$ .

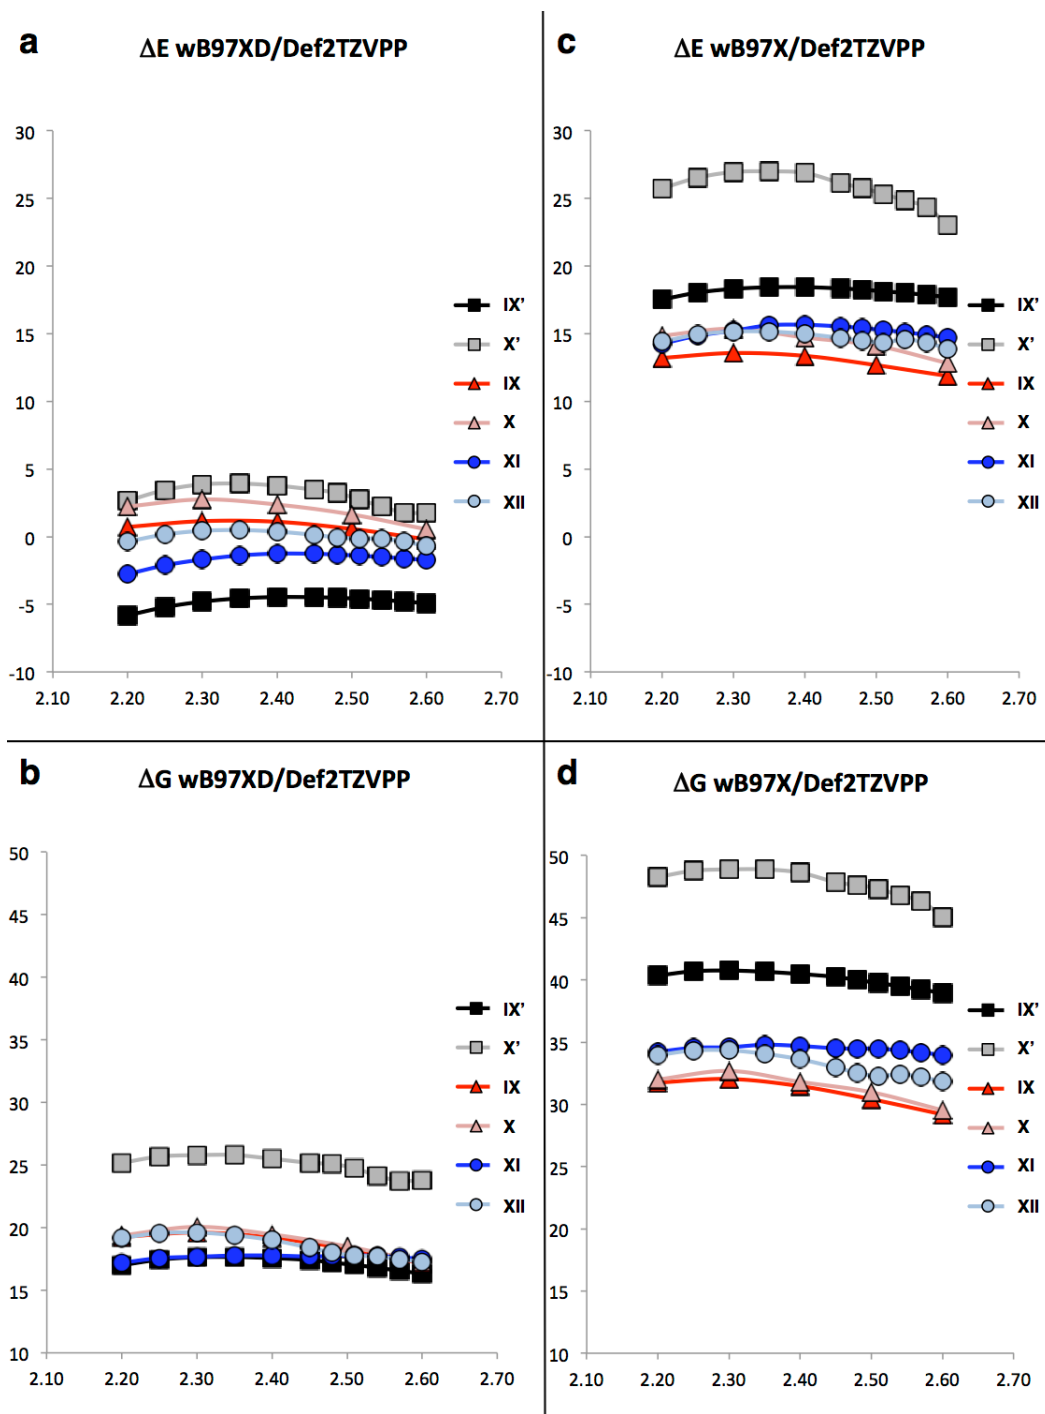

**Figure S7.** (a,b) Single point electronic energies ( $\Delta E$ ) and free energies ( $\Delta G$ ) at the  $\omega$ B97XD/DF-def2-TZVPP<sub>DCM(SMD)</sub> level as a function of the C-C distance [Å]; (c,d) single point electronic energies ( $\Delta E$ ) and free energies ( $\Delta G$ ) at the  $\omega$ B97X/def2-TZVPP<sub>DCM(SMD)</sub> level as a function of the C-C distance [Å];  $\Delta G = \Delta E + G_{\text{corr}}$ .

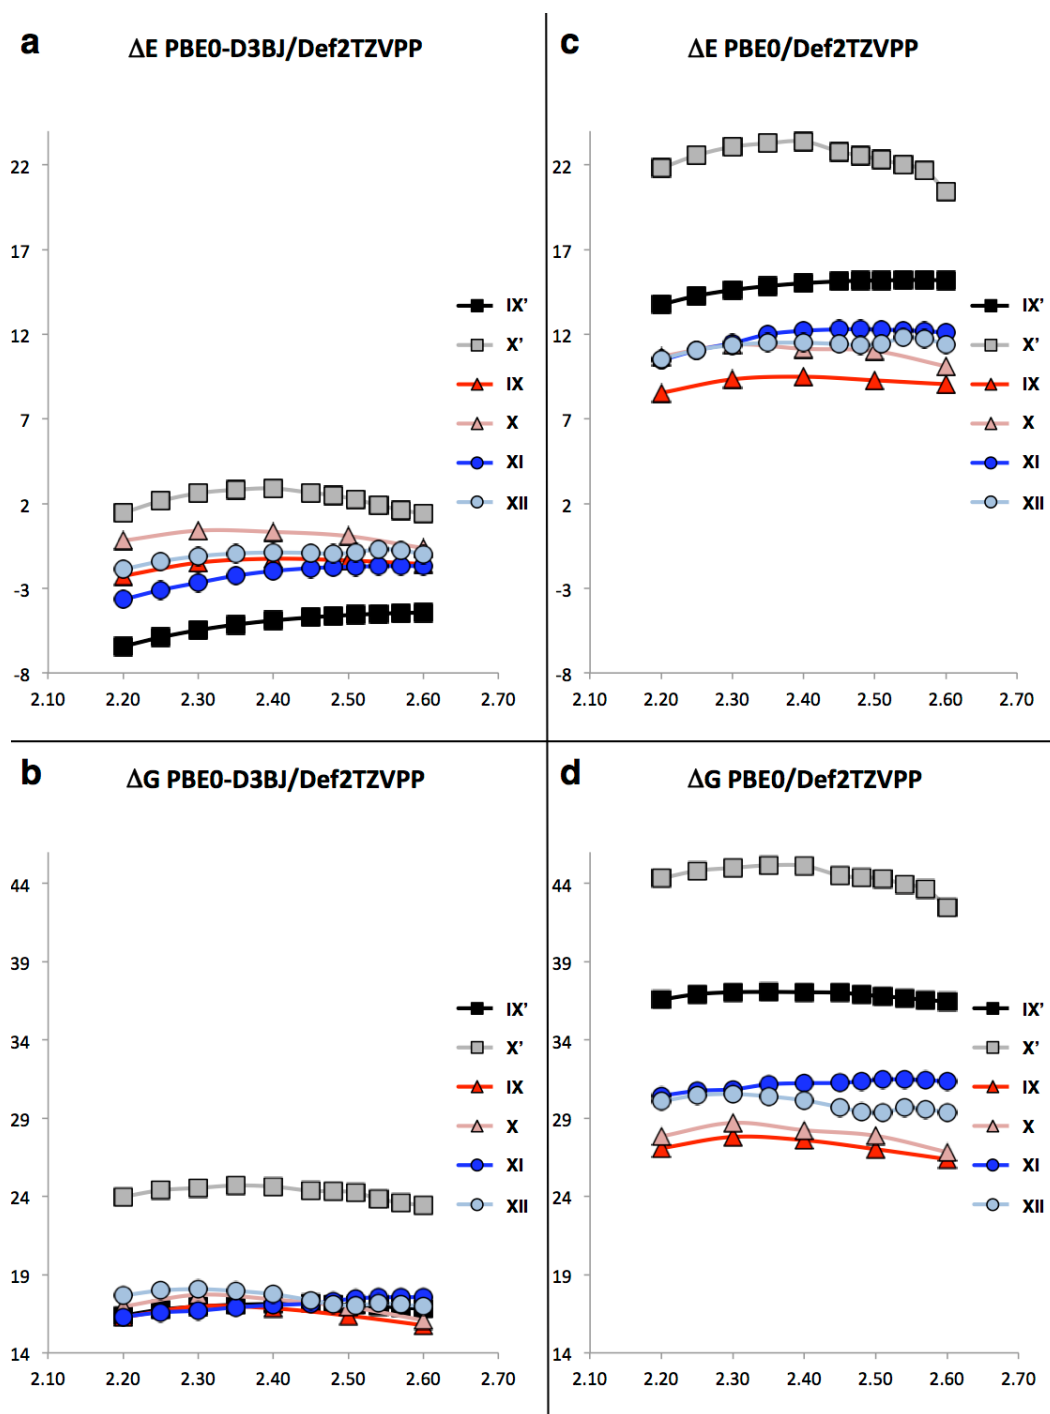

**Figure S8.** (a,b) Single point electronic energies ( $\Delta E$ ) and free energies ( $\Delta G$ ) at the PBE0-D3BJ/DF-def2-TZVPP<sub>DCM(SMD)</sub> level as a function of the C-C distance [Å]; (c,d) single point electronic energies ( $\Delta E$ ) and free energies ( $\Delta G$ ) at the PBE0/def2-TZVPP<sub>DCM(SMD)</sub> level as a function of the C-C distance [Å];  $\Delta G = \Delta E + G_{\text{corr}}$ .

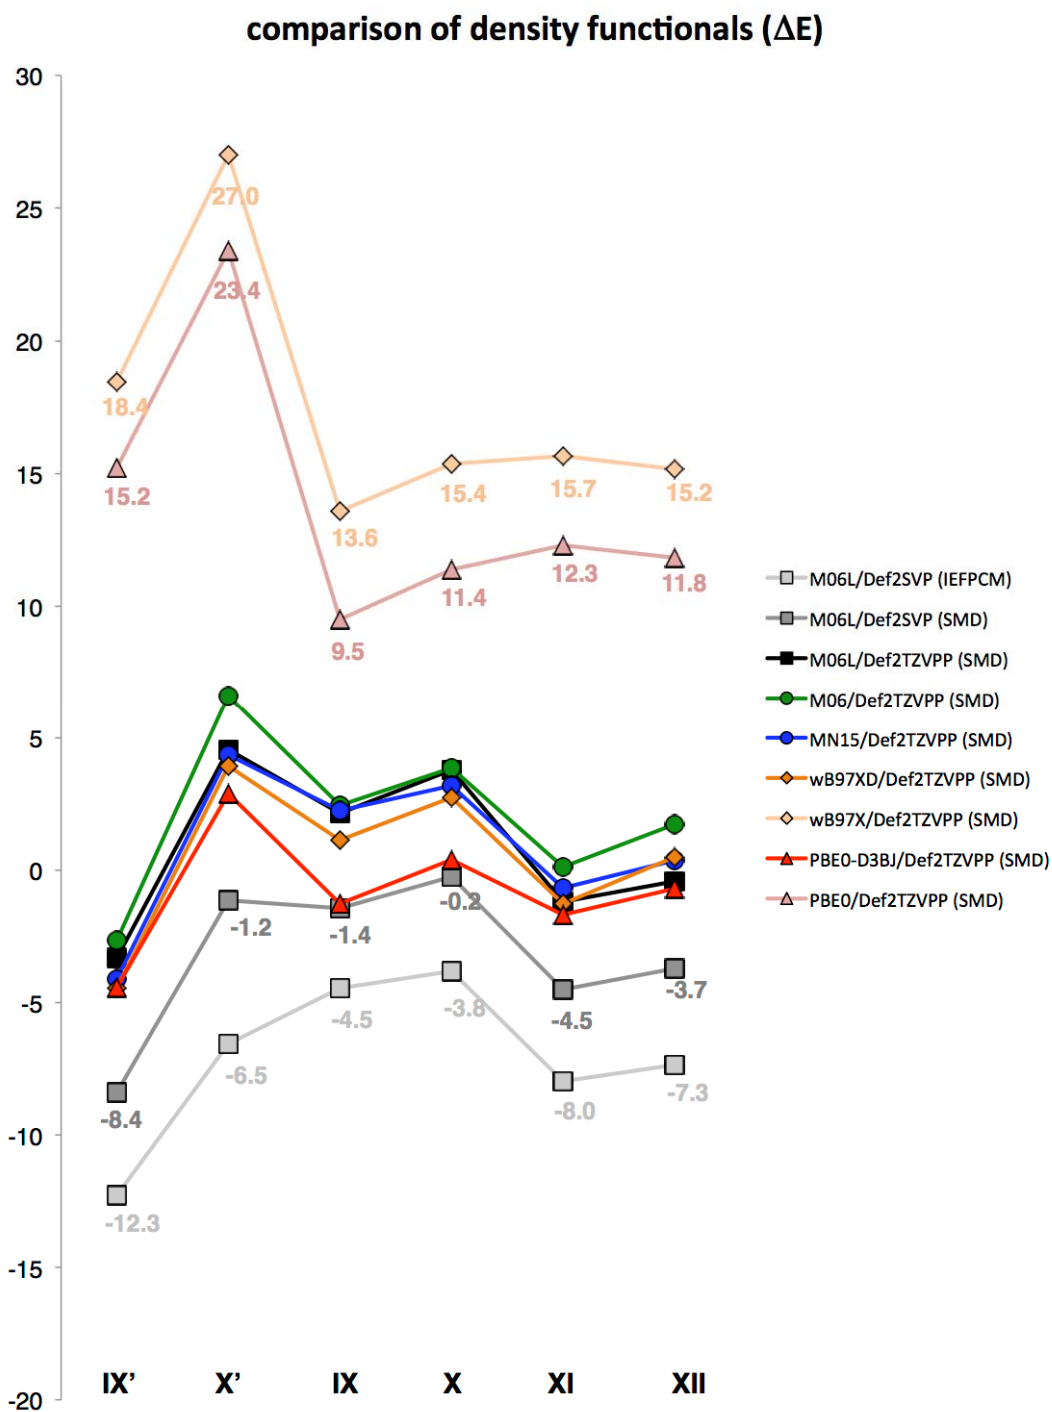

**Figure S9.** Comparison of electronic energies ( $\Delta E$  in kcal/mol) for IX'–XII obtained with several density functionals; the maximum values from the corresponding graphs in Figures S4–S8 have been used.



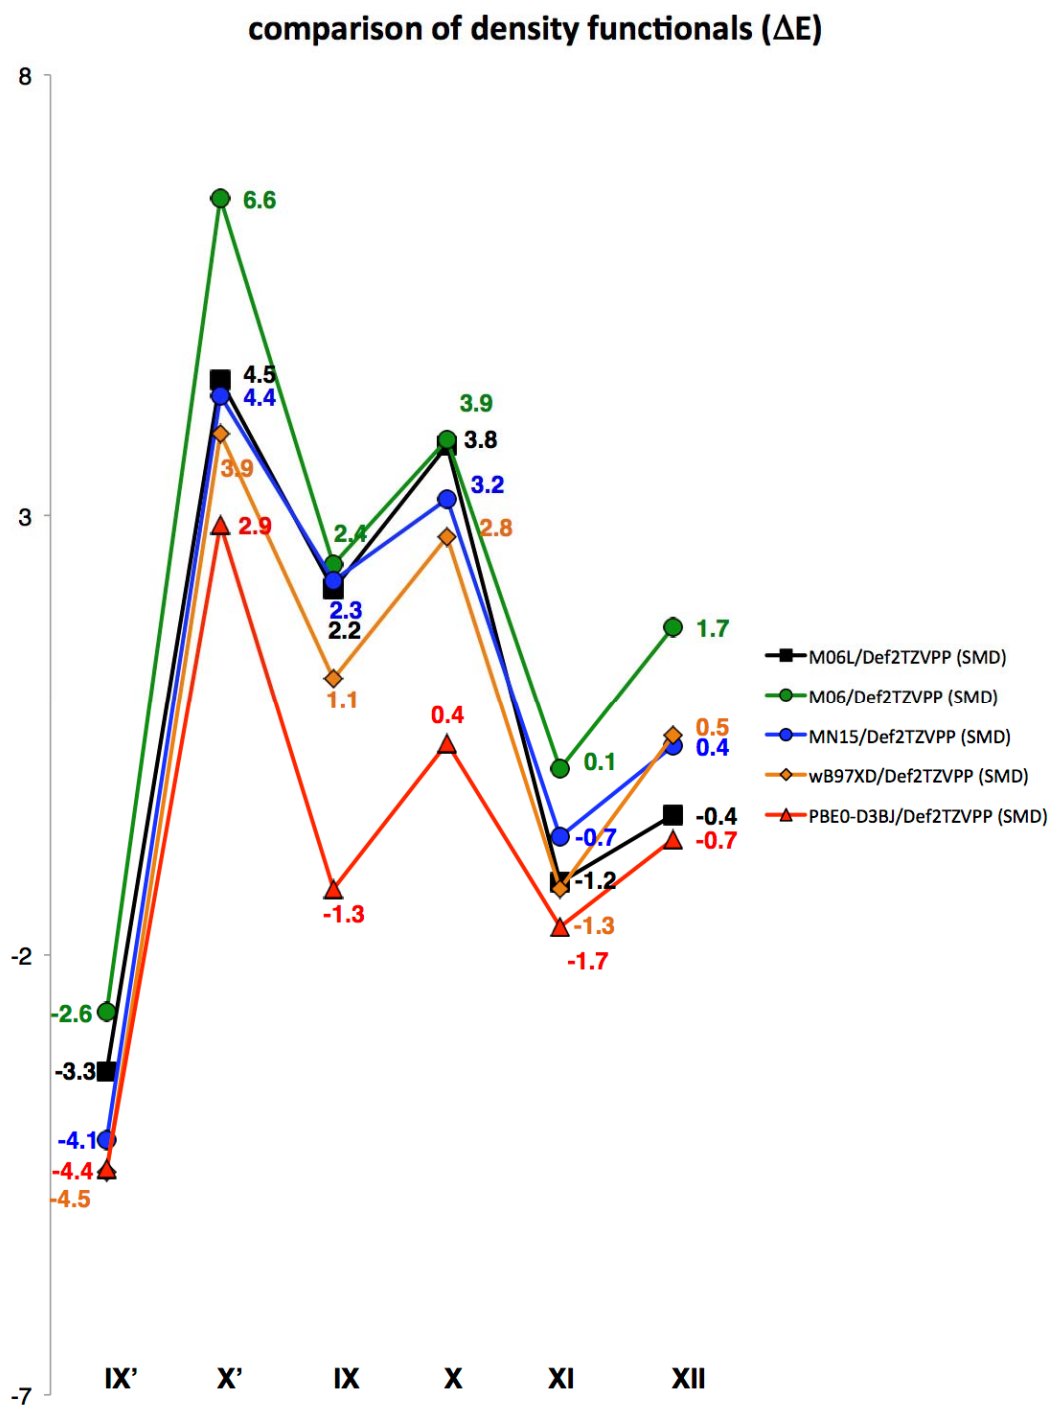

**Figure S10.** Comparison of electronic energies ( $\Delta E$  in kcal/mol) for IX'–XII obtained with several density functionals; expansion of the energy range between  $-7$  and  $8$  kcal/mol in Figure S9.

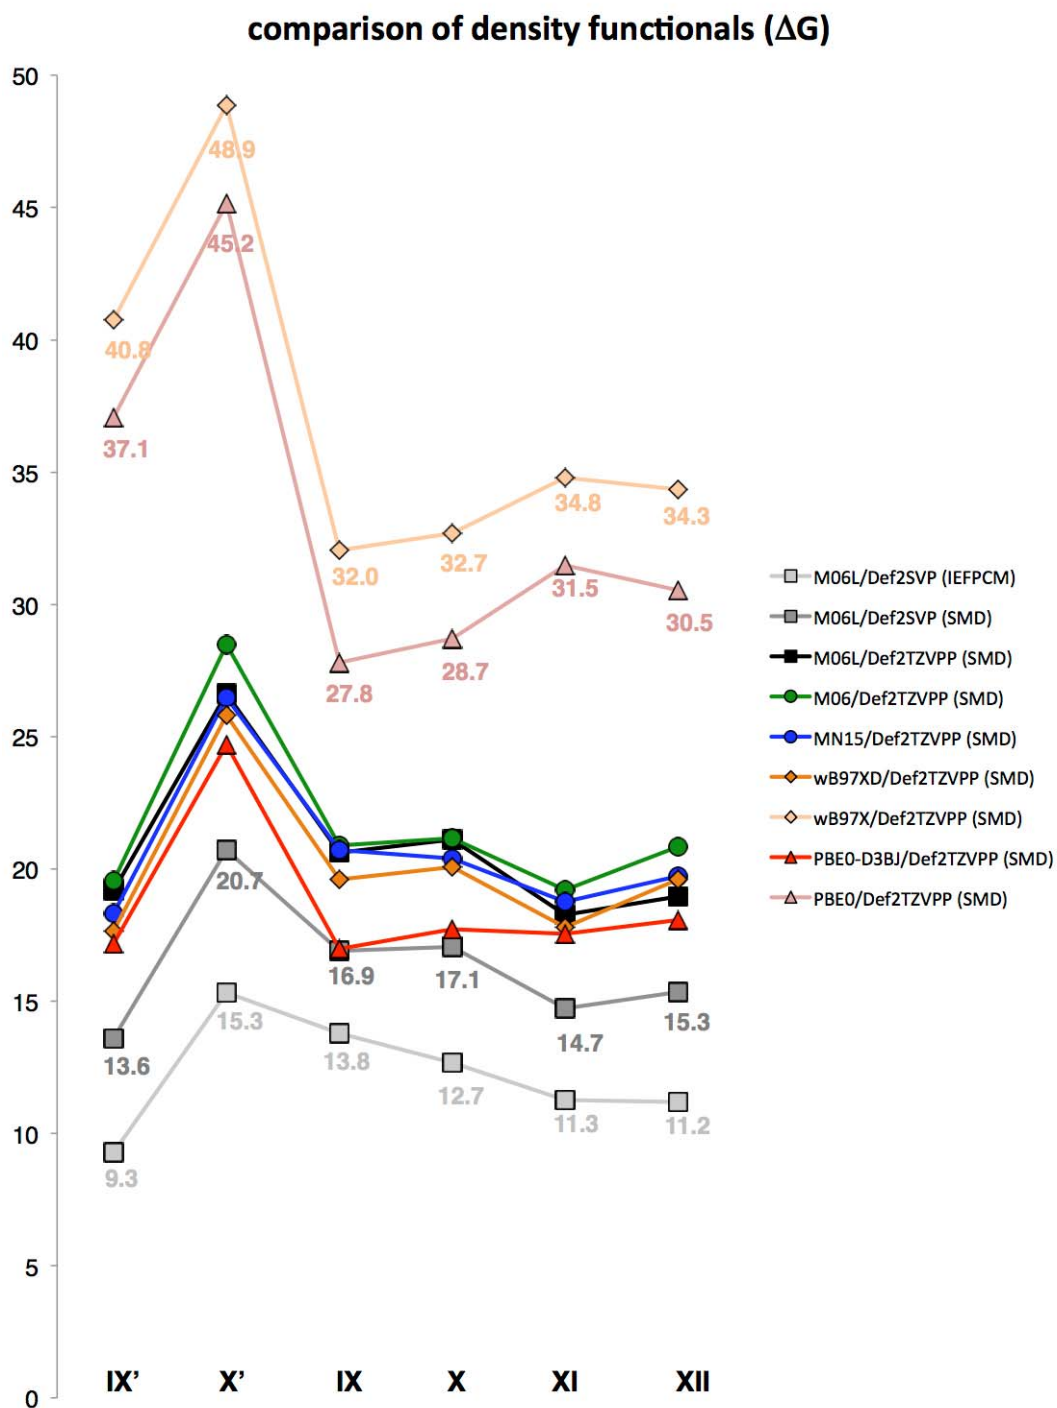

**Figure S11.** Comparison of free energies ( $\Delta G$  in kcal/mol) for IX'–XII obtained with several density functionals; the maximum values from the corresponding graphs in Figures S4–S8 have been used.

### comparison of density functionals ( $\Delta G$ )

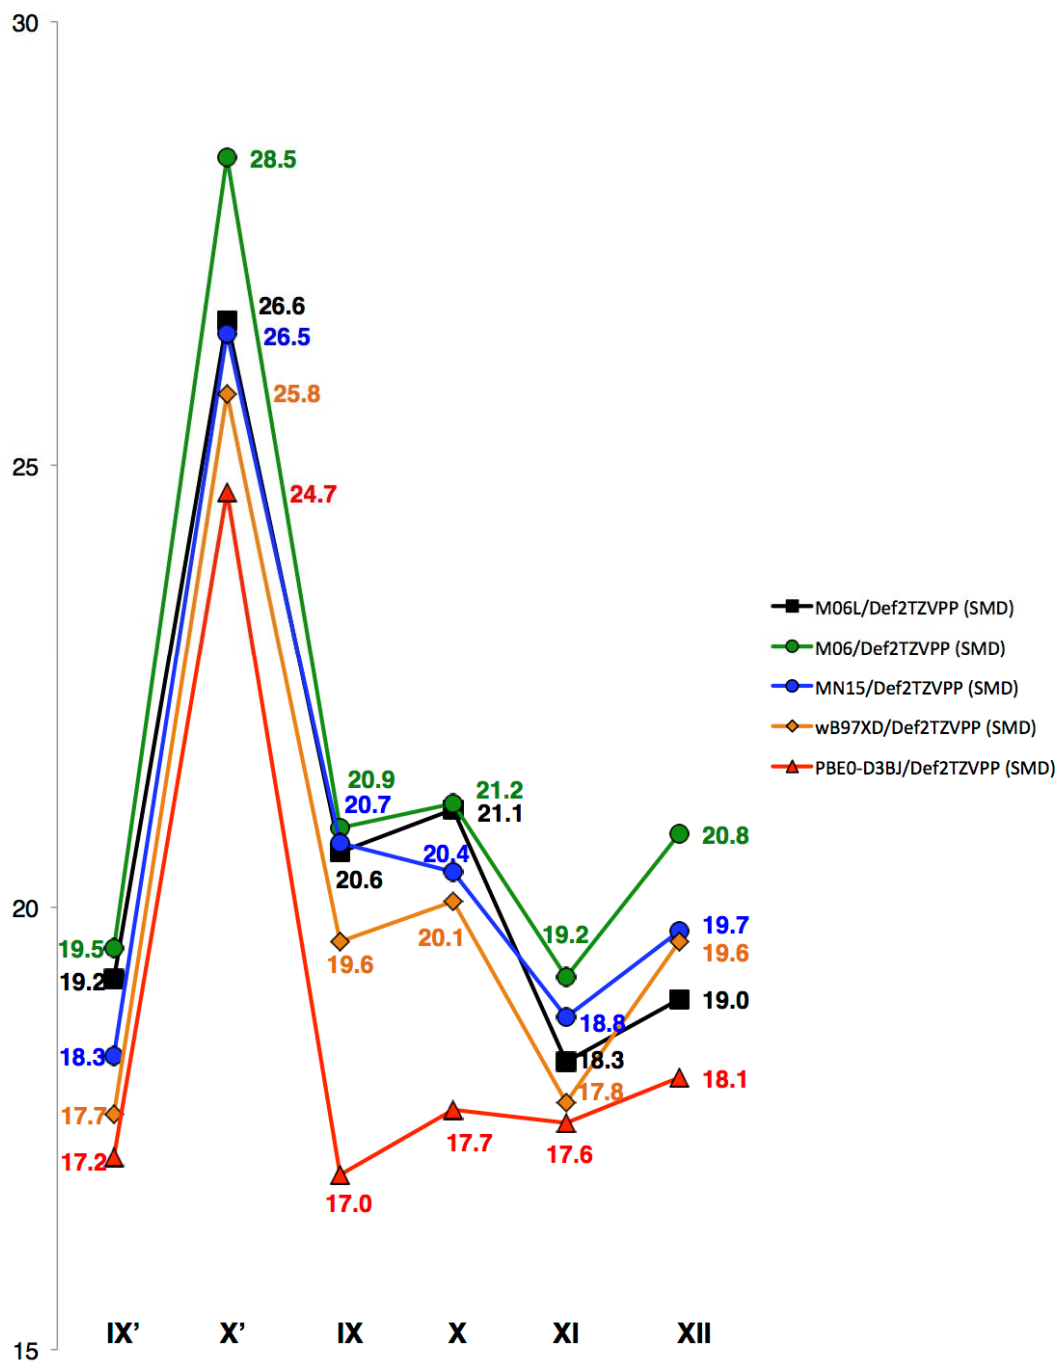

**Figure S12.** Comparison of free energies ( $\Delta G$  in kcal/mol) for IX'–XII obtained with several density functionals; expansion of the energy range between 15 and 30 kcal/mol in Figure S11.

## 7. References

- (1) Tse, M. D.; Bhor, S.; Klawonn, M.; Anilkumar, G.; Jiao, H.; Döbler, C.; Spannenberg, A.; Mägerlein, W.; Hugl, H.; Beller, M. *Chem. Eur. J.* **2006**, *12*, 1855-1874.
- (2) Shen, H.; Zhang, X.; Liu, Q.; Pan, J.; Hu, W.; Xiong, Y.; Zhu, X. *Tetrahedron Lett.* **2015**, *56*, 5628-5631.
- (3) Giumanini, A. G.; Chiavari, G.; Musiani, M. M.; Rossi, P. *Synthesis* **2008**, 743-746.
- (4) Collins, K. D.; Rühling, A.; Lied, F.; Glorius, F. *Chem. Eur. J.* **2014**, *20*, 3800-3805.
- (5) Benson, Jr, O.; Demirdji, S. H.; Haltiwanger, R. C.; Koch, T. H. *J. Am. Chem. Soc.* **1991**, *113*, 8879-8886.
- (6) Brown, H. C.; Kanth, J. V. B.; Dalvi, P. V.; Zaidlewicz, M. *J. Org. Chem.* **1994**, *64*, 6263-6274.
- (7) Rao, R.; Shewalkar, M. P.; Nandipati, R.; Yadav, J. S.; Khagga, M.; Shinde, D. B. *Synth. Commun.* **2012**, *42*, 589-598.
- (8) Simov, B. P.; Wuggenig, F.; Mereiter, K.; Andres, H.; France, J.; Schnell, P.; Hammerschmidt, F. *J. Am. Chem. Soc.* **2005**, *127*, 13934-13940.
- (9) Burgy, G.; Tahtouh, T.; Durieu, E.; Foll-Josselin, B.; Limanton, E.; Meijer, L.; Carreaux, F.; Bazurea, J. P. *Eur. J. Med. Chem.* **2013**, *62*, 728-737.
- (10) Nam, K.-H.; Kim, H.; Choi, H. K.; Yeo, H.; Goh, M.; Yu, J.; Hahn, J. R.; Han, H.; Ku, B.-C.; You, N.-H. *Polymer* **2017**, *108*, 502-512.
- (11) Noël, S.; Hoegy, F.; Rivault, F.; Rognan, D.; Schalk, I. J.; Mislin, G. L. A. *Bioorg. Med. Chem. Lett.* **2014**, *24*, 132-135.
- (12) Youn, S. W.; Kim, Y. H. *Org. Lett.* **2016**, *18*, 6140-6143.
- (13) Lombardi, C.; Day, J.; Chandrasoma, N.; Mitchell, D.; Rodriguez, M. J.; Farmer, J. L.; Organ, M. G. *Organometallics* **2017**, *36*, 251-254.
- (14) Miura, T.; Mikano, Y.; Murakami, M. *Org. Lett.* **2011**, *13*, 3560-3563.
- (15) Zhou, G. Q.; Yost, J. M.; Sauer, S. J.; Coltart, D. M. *Org. Lett.* **2007**, *9*, 4663-4665.
- (16) Andrade, C. K. Z.; Rocha, R. O.; Vercillo, O. E.; Silva, W. A.; Matos, R. A. F. *Synlett* **2003**, *15*, 2351-2352.
- (17) Evans, D. A.; Chapman, K. T.; Bisaha, J. *J. Am. Chem. Soc.* **1984**, *106*, 4261-4263.

- (18) Davies, S. G.; Epstein, S. W.; Garner, A. C.; Ichihara, O.; Smith, A. D. *Tetrahedron: Asymmetry* **2002**, *13*, 1555-1565.
- (19) Kawakami, T.; Ohtake, H.; Arakawa, H.; Okachi, T.; Imada, Y.; Murahashi, S.-I. *Bull. Chem. Soc. Jpn.* **2000**, *73*, 2423-2444.
- (20) Liao, Y.; Bhattacharjee, S.; Firestone, K. A.; Eichinger, B. E.; Paranjli, R.; Anderson, C. A.; Robinson, B. H.; Reid, P. J.; Dalton, L. R. *J. Am. Chem. Soc.* **2006**, *128*, 6847-6853.
- (21) Hirose, T.; Sunazuka, T.; Yamamoto, D.; Kojima, N.; Shirahata, T.; Harigaya, Y.; Kuwajima, I.; Ōmura, S. *Tetrahedron* **2005**, *61*, 6015-6039.
- (22) Lim, C.-K.; Kim, S.; Kwon, I. C.; Ahn, C.-H.; Park, S. Y. *Chem. Mater.* **2009**, *21*, 5819-5825.
- (23) Ellis, D. A.; Blazel, J. K.; Tran, C. V.; Ruebsam, F.; Murphy, D. E.; Li, L.-S.; Zhao, J.; Zhou, Y.; McGuire, H. M.; Xiang, A. X.; Webber, S. E.; Zhao, Q.; Han, Q.; Kissinger, C. R.; Lardy, M.; Gobbi, A.; Showlater, R. E.; Shah, A. M.; Tsan, M.; Patel, R. A.; LeBrun, L. A.; Kamran, R.; Bartkowski, D. M.; Nolan, T. G.; Norris, D. A.; Sergeeva, M. V.; Kirkovsky, L. *Bioorg. Med. Chem. Lett.* **2009**, *19*, 6047-6052.
- (24) Williams, D. R.; Nold, A. L.; Mullins, R. J. *J. Org. Chem.* **2004**, *69*, 5374-5382.
- (25) Jurberg, I. D.; Peng, B.; Wöstefeld, E.; Wasserloos, M.; Malide, N. *Angew. Chem., Int. Ed.* **2012**, *51*, 1950-1953.
- (26) Blackmond, D. G. *J. Am. Chem. Soc.* **2015**, *137*, 10852-10866.
- (27) Burés, J. *Angew. Chem., Int. Ed.* **2016**, *55*, 2028-2031.
- (28) For reviews on the application of DFT calculations to transition metal chemistry, see:  
(a) Cramer, C. J. & Truhlar, D. G. *Phys. Chem. Chem. Phys.* **2009**, *11*, 10757-10816.  
(b) Grimme, S., Ehrlich, S. & Goerigk, L. *J. Comp. Chem.* **2011**, *32*, 1456-1465. (c) Peverati, R.; Truhlar, D. G. *Phil. Trans. R. Soc. A* **2014**, *372*, 20120476. For recent comparisons of density functionals in benchmark studies, see: (d) Mardirossian, N.; Head-Gordon, M. *J. Chem. Theory Comput.* **2016**, *12*, 4303-4325. (e) Mardirossian, N.; Head-Gordon, M. *J. Chem. Phys.* **2016**, *144*, 214110. (f) Brauer, B.; Kesharwani, M. K.; Kozuch, S.; Martin, J. M. *Phys. Chem. Chem. Phys.* **2016**, *18*, 20905-20925. (g) Weymuth, T.; Couzijn, E. P. A.; Chen, P.; Reiher, M. *J. Chem. Theory Comput.*

- 2014**, *10*, 3092-3103. (h) Zhang, W.; Truhlar, D. G.; Tang M. *J. Chem. Theory Comput.* **2013**, *9*, 3965-3977. (i) Yu, H. S.; He, X.; Li, S. L.; Truhlar, D. G. *Chem. Sci.* **2016**, *7*, 5032-5051. (j) Steinmetz, M.; Grimme S. *ChemistryOpen* **2013**, *2*, 115-124. (k) Goerigk, L.; Kruse H.; Grimme, S. *ChemPhysChem* **2011**, *12*, 3421-3433.
- (29) Frisch, M. J.; Trucks, G. W.; Schlegel, H. B.; Scuseria, G. E.; Robb, M. A.; Cheeseman, J. R.; Scalmani, G.; Barone, V.; Mennucci, B.; Petersson, G. A.; Nakatsuji, H.; Caricato, M.; Li, X.; Hratchian, H. P.; Izmaylov, A. F.; Bloino, J.; Zheng, G.; Sonnenberg, J. L.; Hada, M.; Ehara, M.; Toyota, K.; Fukuda, R.; Hasegawa, J.; Ishida, M.; Nakajima, T.; Honda, Y.; Kitao, O.; Nakai, H.; Vreven, T.; Montgomery, Jr., J. A.; Peralta, J. E.; Ogliaro, F.; Bearpark, M.; Heyd, J. J.; Brothers, E.; Kudin, K. N.; Staroverov, V. N.; Kobayashi, R.; Normand, J.; Raghavachari, K.; Rendell, A.; Burant, J. C.; Iyengar, S. S.; Tomasi, J.; Cossi, M.; Rega, N.; Millam, J. M.; Klene, M.; Knox, J. E.; Cross, J. B.; Bakken, V.; Adamo, C.; Jaramillo, J.; Gomperts, R.; Stratmann, R. E.; Yazyev, O.; Austin, A. J.; Cammi, R.; Pomelli, C.; Ochterski, J. W.; Martin, R. L.; Morokuma, K.; Zakrzewski, V. G.; Voth, G. A.; Salvador, P.; Dannenberg, J. J.; Dapprich, S.; Daniels, A. D.; Farkas, Ö.; Foresman, J. B.; Ortiz, J. V.; Cioslowski, J.; Fox, D. J. *Gaussian 09, Revision D.01*, Gaussian, Inc., Wallingford CT (2009).
- (30) Zhao, Y.; Truhlar, D. G. *Acc. Chem. Res.* **2008**, *41*, 157-167.
- (31) Weigend, F.; Ahlrichs, R. *Phys. Chem. Chem. Phys.* **2005**, *7*, 3297-3305.
- (32) Weigend, F. *Phys. Chem. Chem. Phys.* **2006**, *8*, 1057-1065.
- (33) Scalmani, G.; Frisch, M. J. *J. Chem. Phys.* **2010**, *132*, 114110.
- (34) Marenich, A. V.; Cramer, C. J.; Truhlar, D. G. *J. Phys. Chem. B* **2009**, *113*, 6378-6396.
- (35) For selected examples highlighting the importance of including treatment of dispersion interactions in modeling olefin metathesis reactions promoted by Ru carbene complexes, see: (a) Torker, S.; Merki, D.; Chen, P. *J. Am. Chem. Soc.* **2008**, *130*, 4808-4814. (b) Minenkov, Y.; Occhipinti, G.; Singstad, A.; Jensen, V. R. *Dalton Trans.* **2012**, *41*, 5526-5541. (c) Minenkov, Y.; Occhipinti, G.; Jensen, V. R. *Organometallics* **2013**, *32*, 2099-2111. (d) Khan, R. K. M.; Torker, S.; Hoveyda, A.

- H. *J. Am. Chem. Soc.* **2014**, *136*, 14337–14340. (e) Torker, S.; Koh, M. J.; Khan, R. K. M.; Hoveyda, A. H. *Organometallics* **2016**, *35*, 543-562. (f) Mikus, M. S.; Torker, S.; Hoveyda, A. H. *Angew. Chem., Int. Ed.* **2016**, *55*, 4997–5002.
- (36) Chai, J.-D.; Head-Gordon, M. *Phys. Chem. Chem. Phys.* **2008**, *10*, 6615-6620.
- (37) Adamo, C.; Barone, V. *J. Chem. Phys.* **1999**, *110*, 6158–6169.
- (38) Lichtenberger, D. L.; Gladysz, J. A. *Organometallics* **2014**, *33*, 835–835. The “coordinates.xyz” file can be generated by copying all the coordinates in SI Section 9 into a text file without empty lines and changing the extension to “.xyz”.
- (39) Yang, L.; Adam, C.; Nichol, G. S.; Cockroft, S. L. *Nat. Chem.* **2013**, *5*, 1006-1010.
- (40) Pollice, R.; Bot, M.; Kobylanskii, I. J.; Shenderovich, I.; Chen, P. *J. Am. Chem. Soc.* **2017**, *139*, 13126-13140.

## 8. NMR Spectra for New Compounds

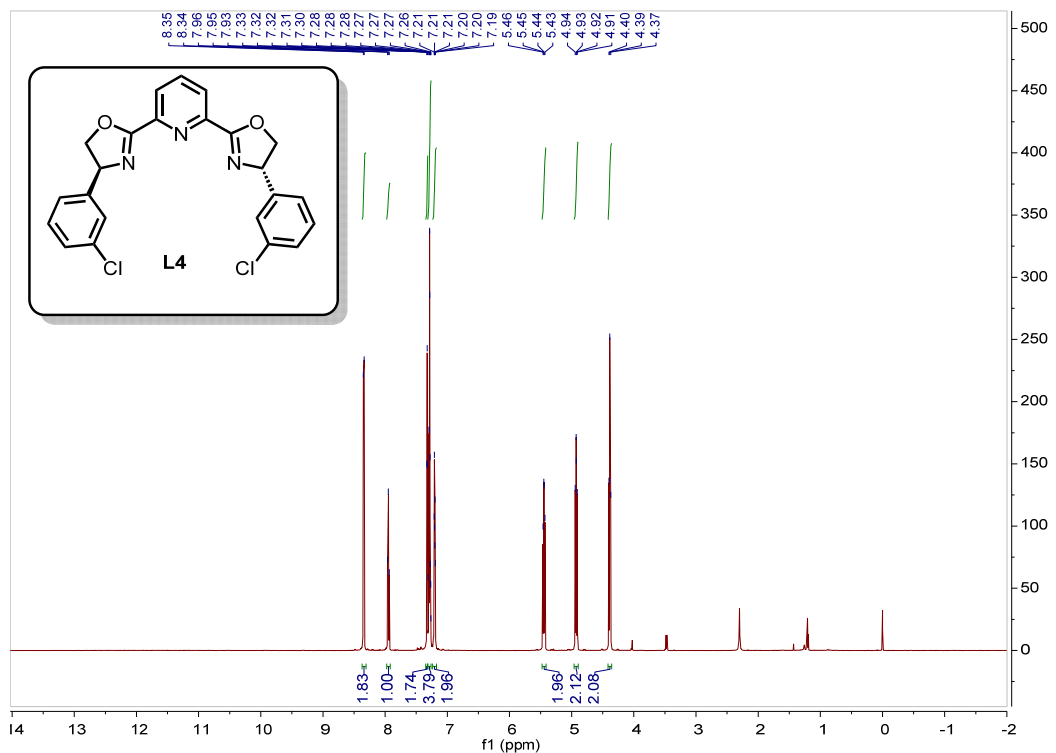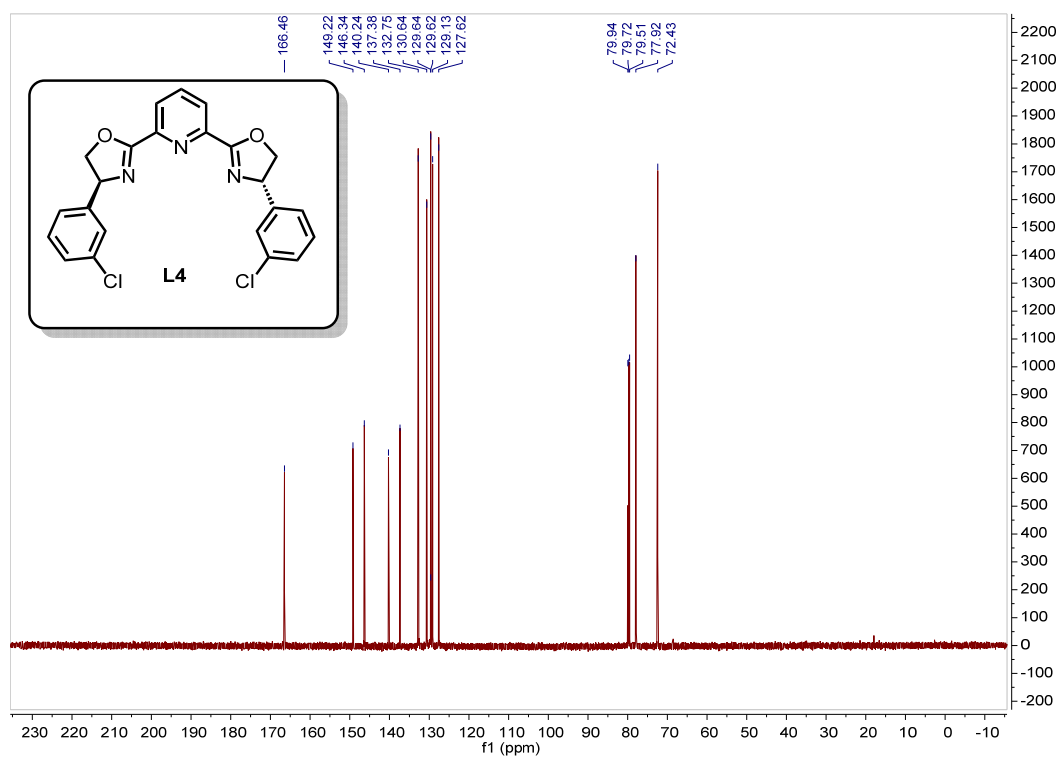



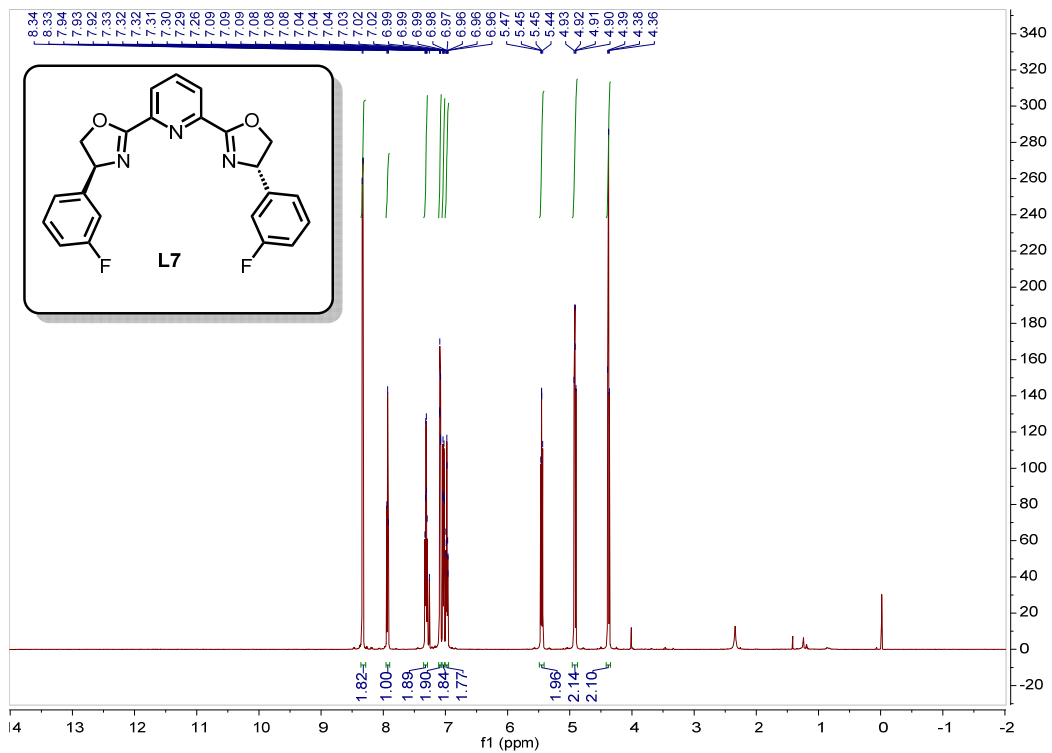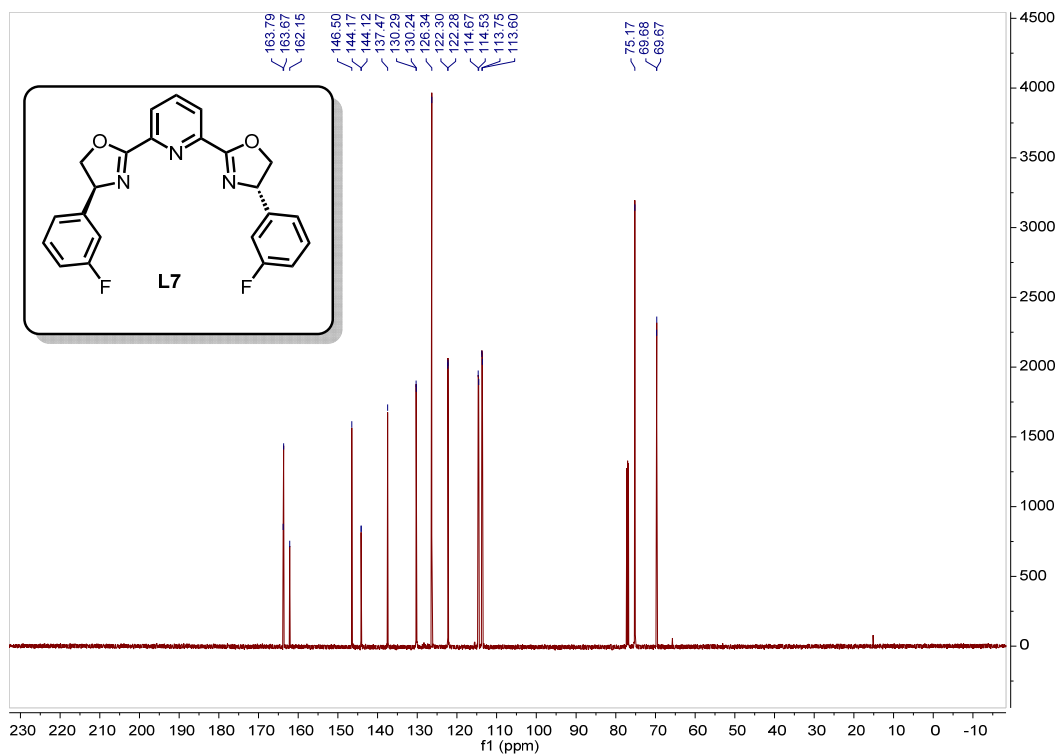

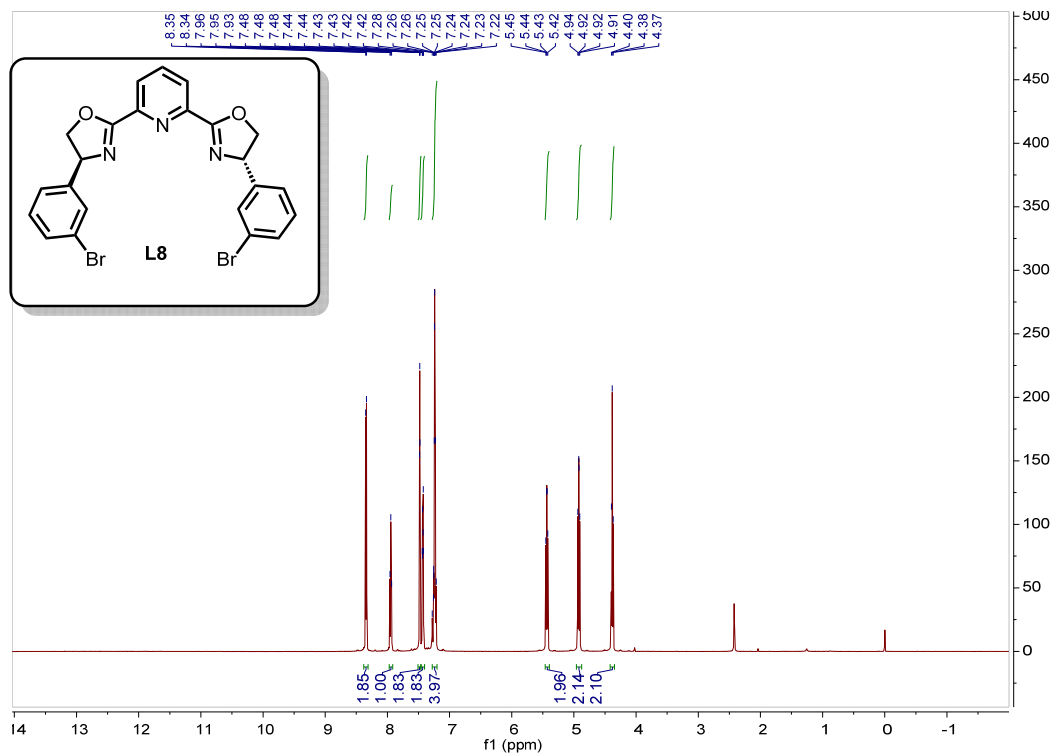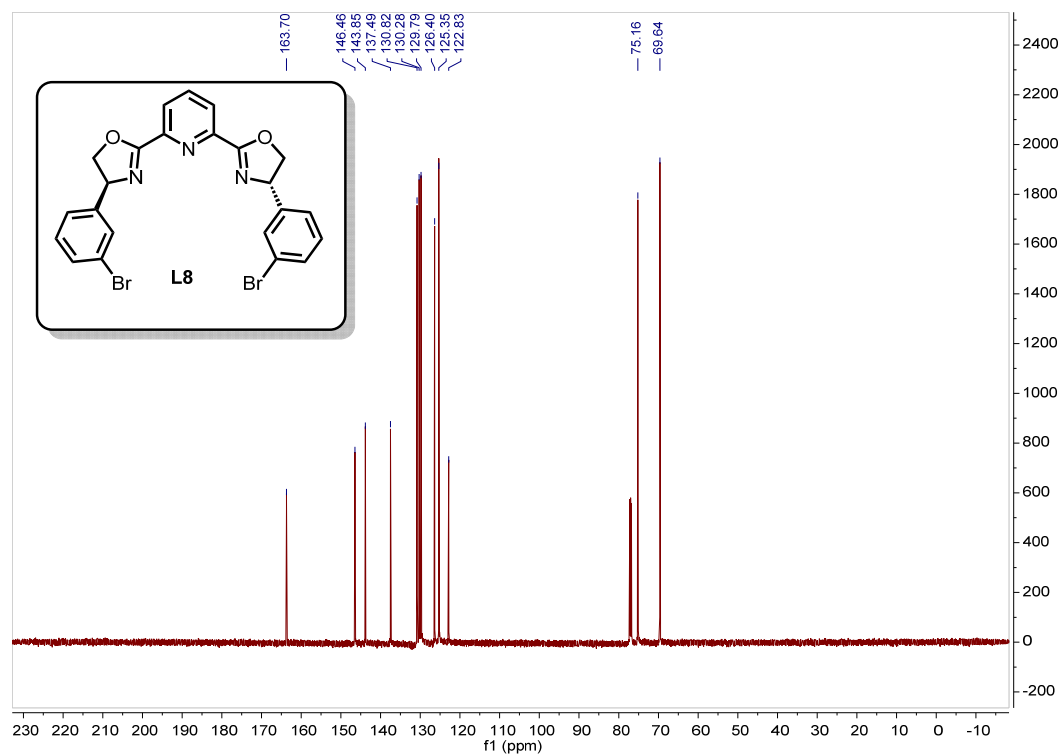

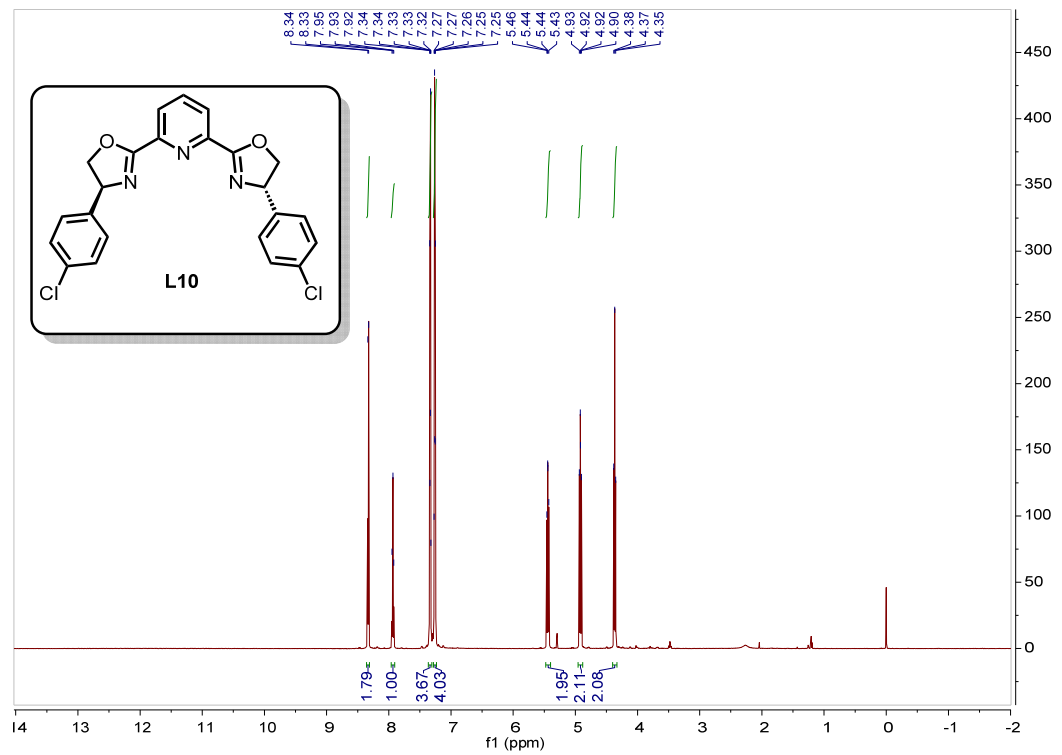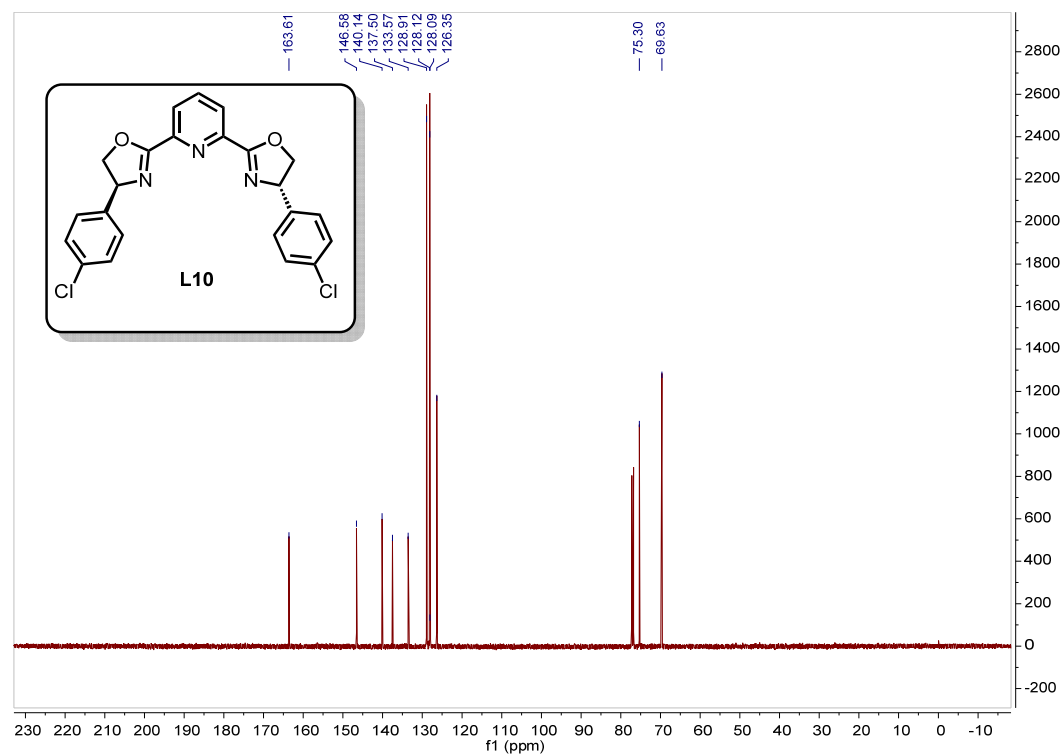

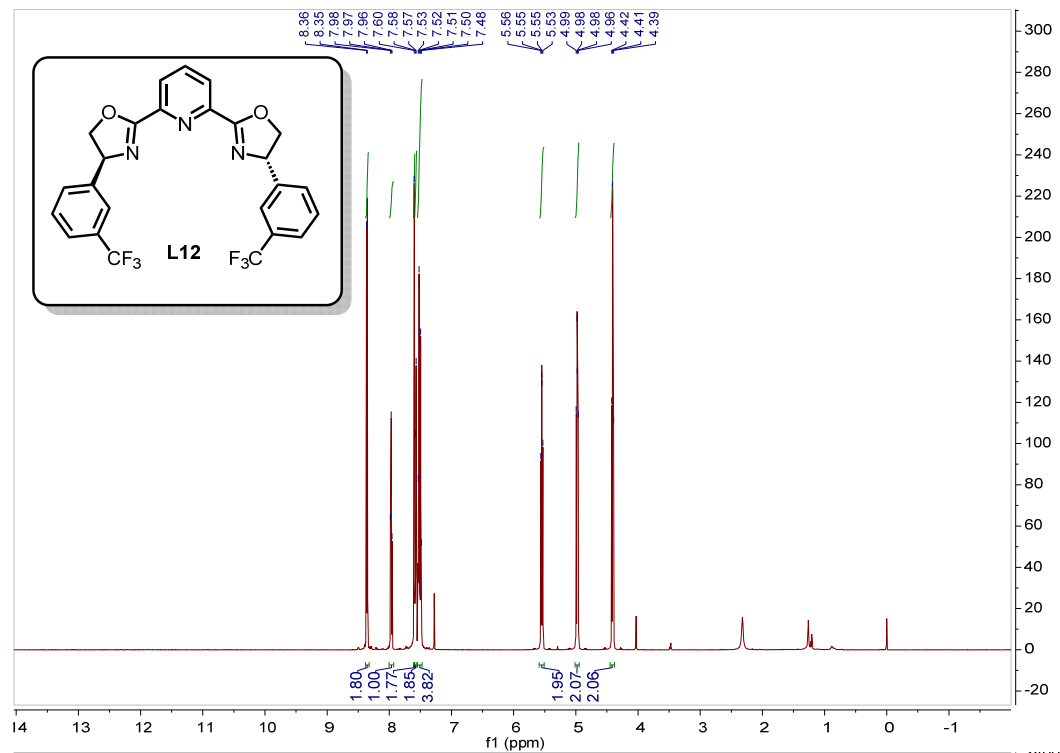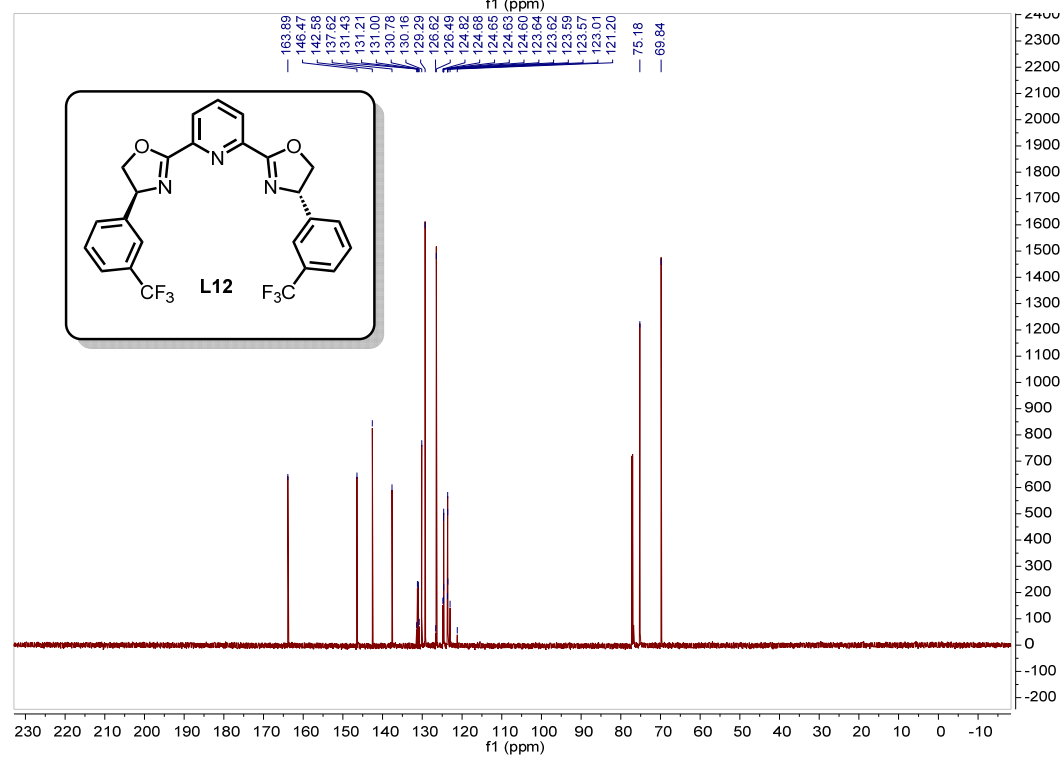





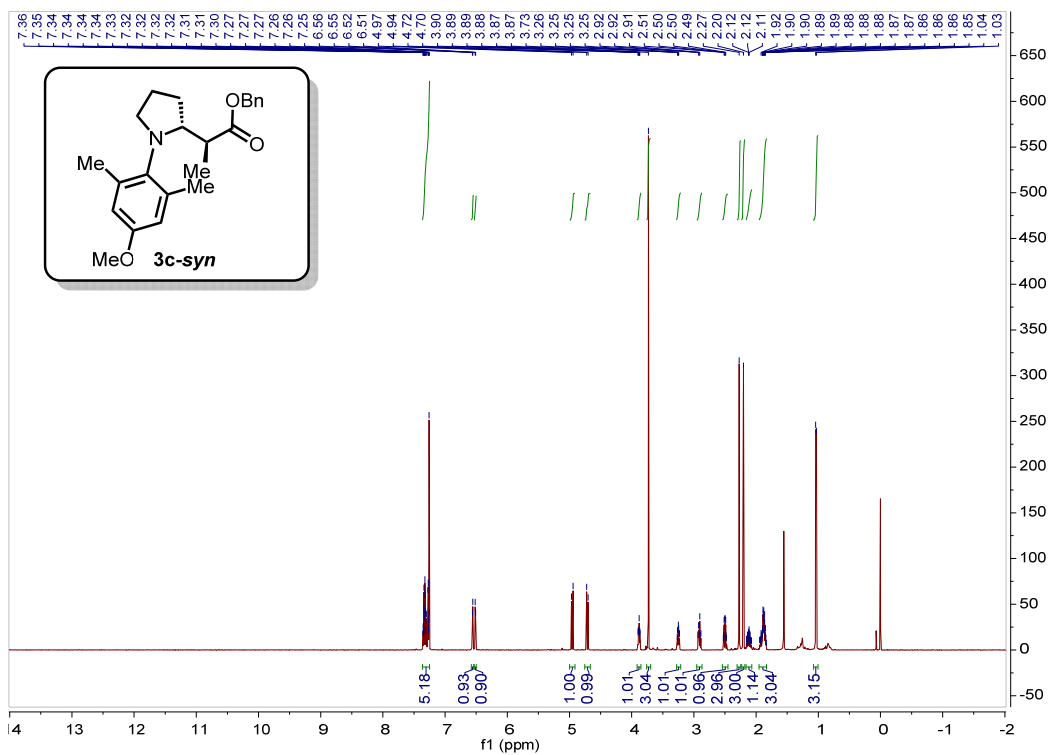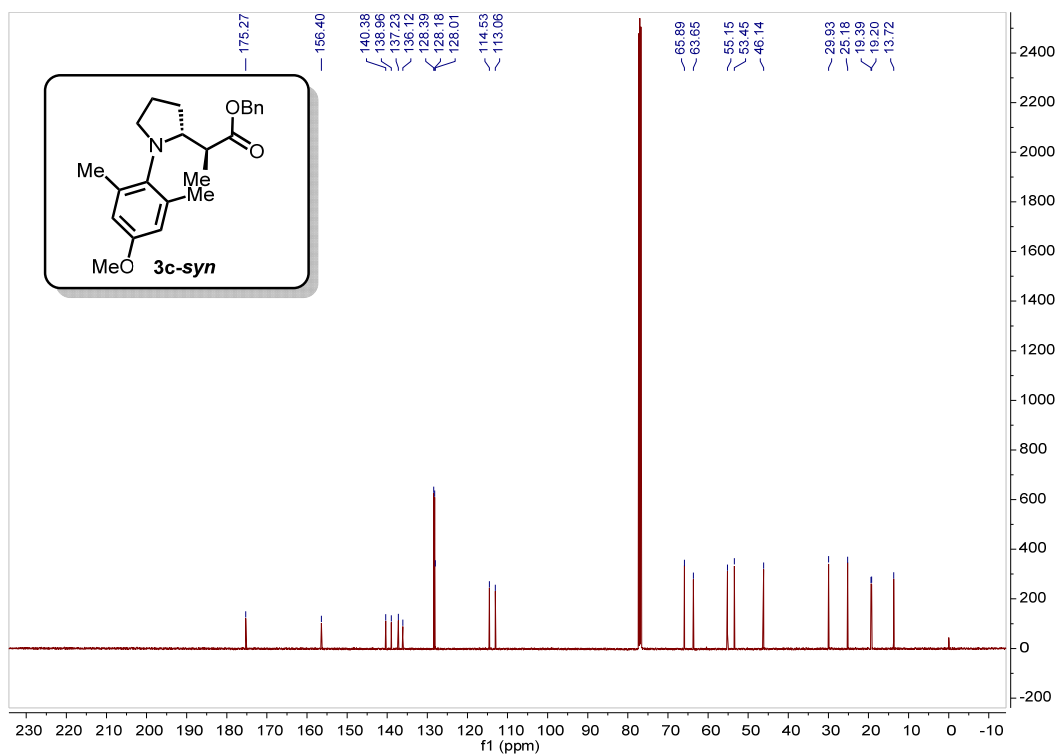

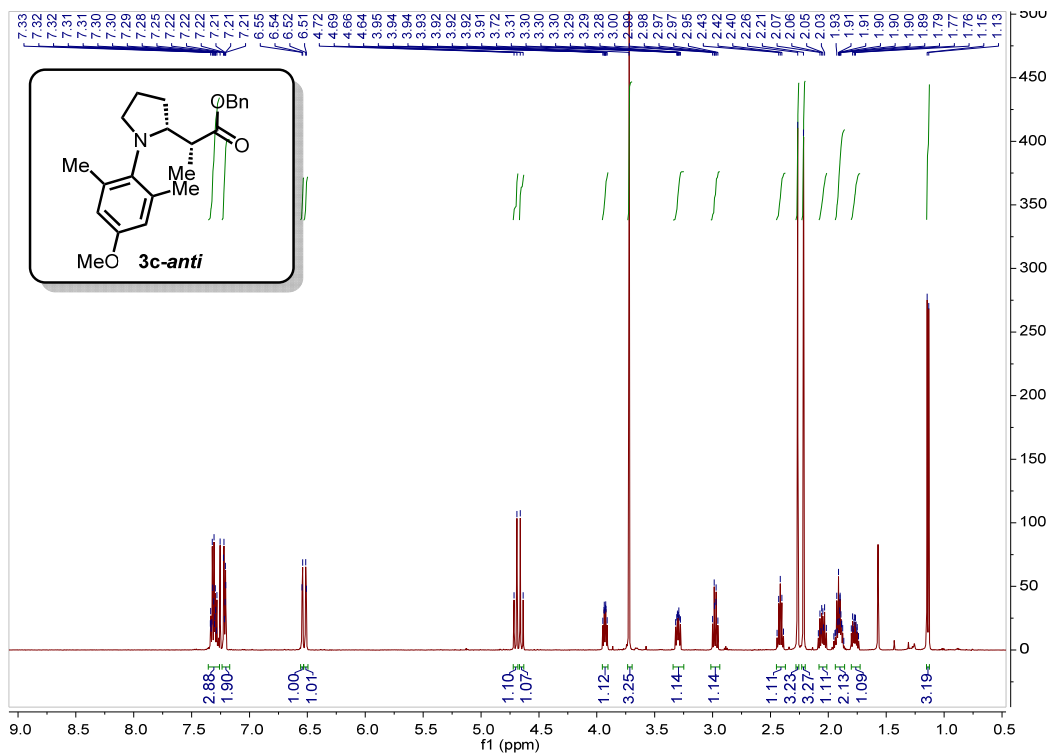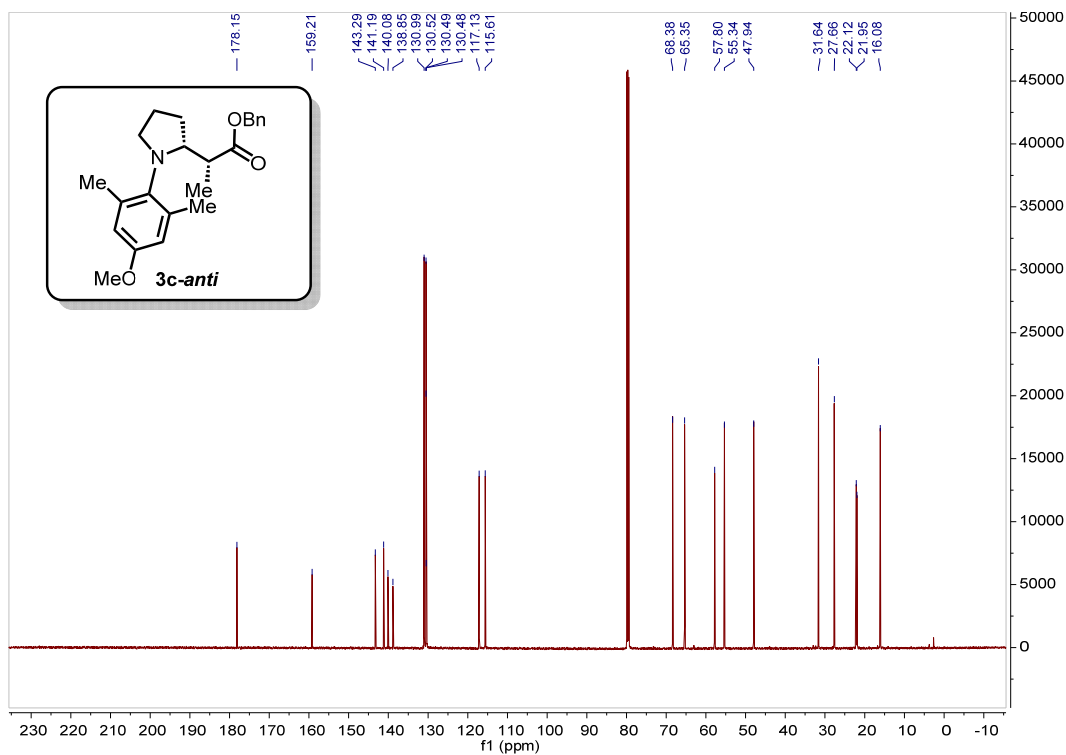



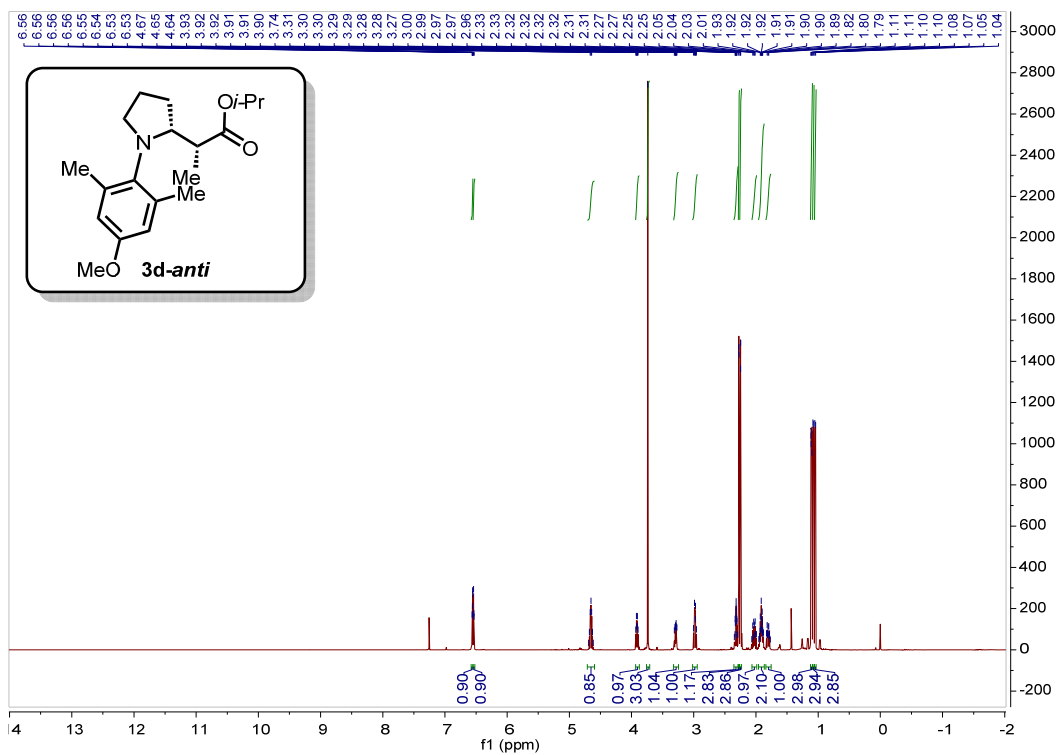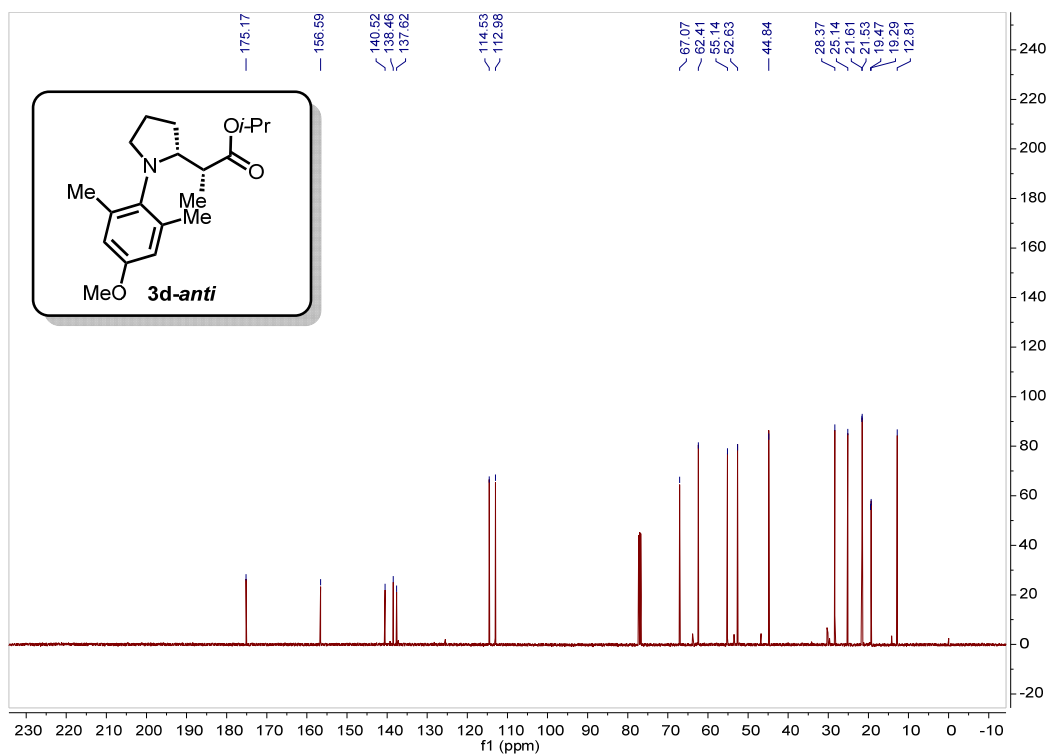

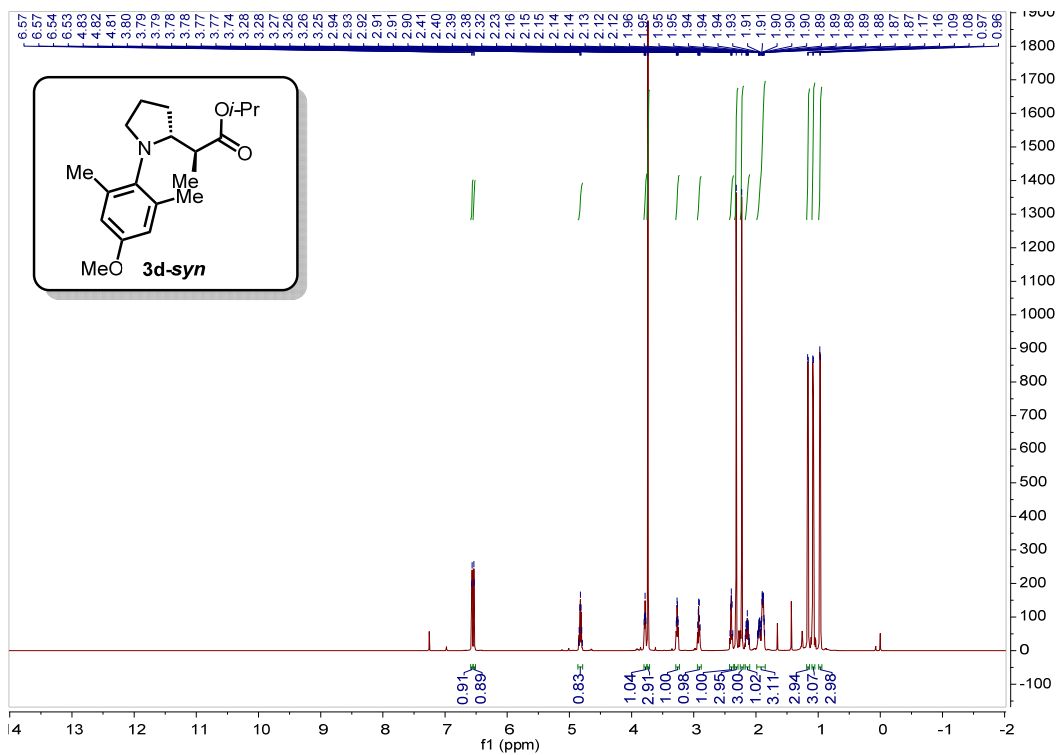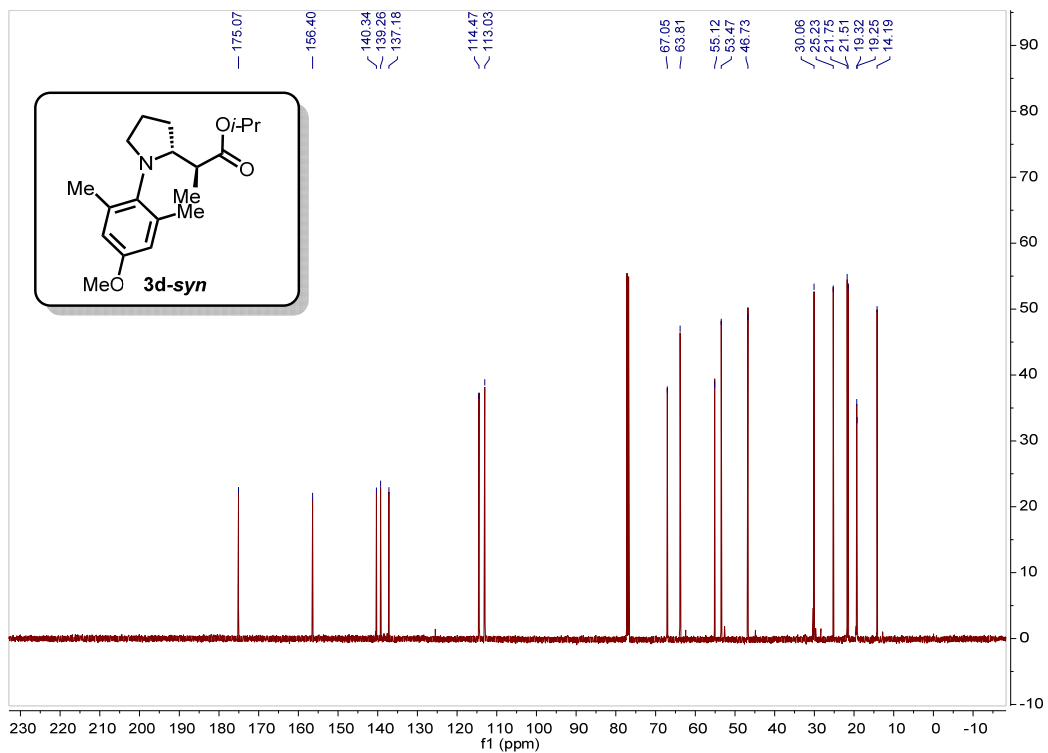

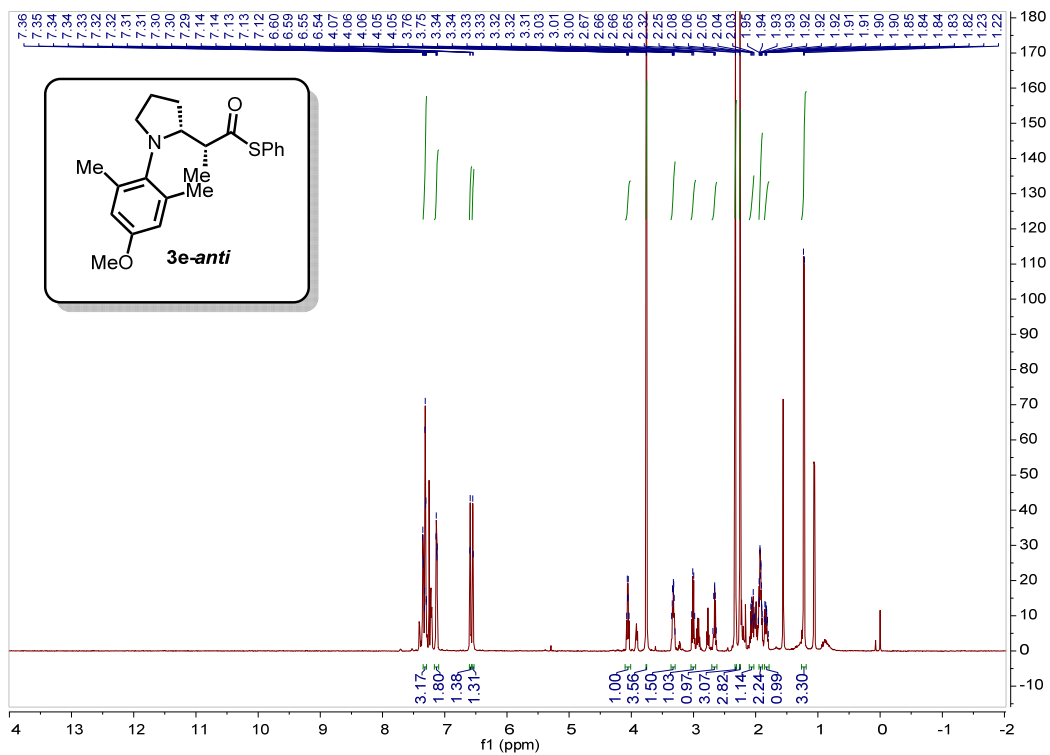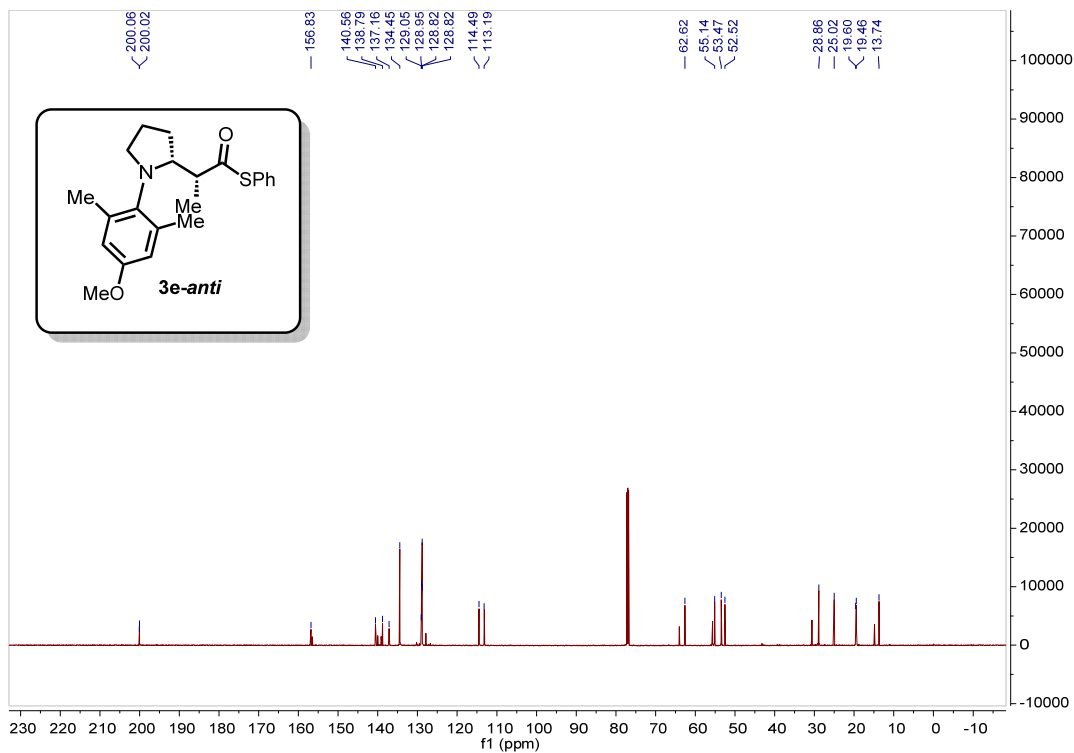

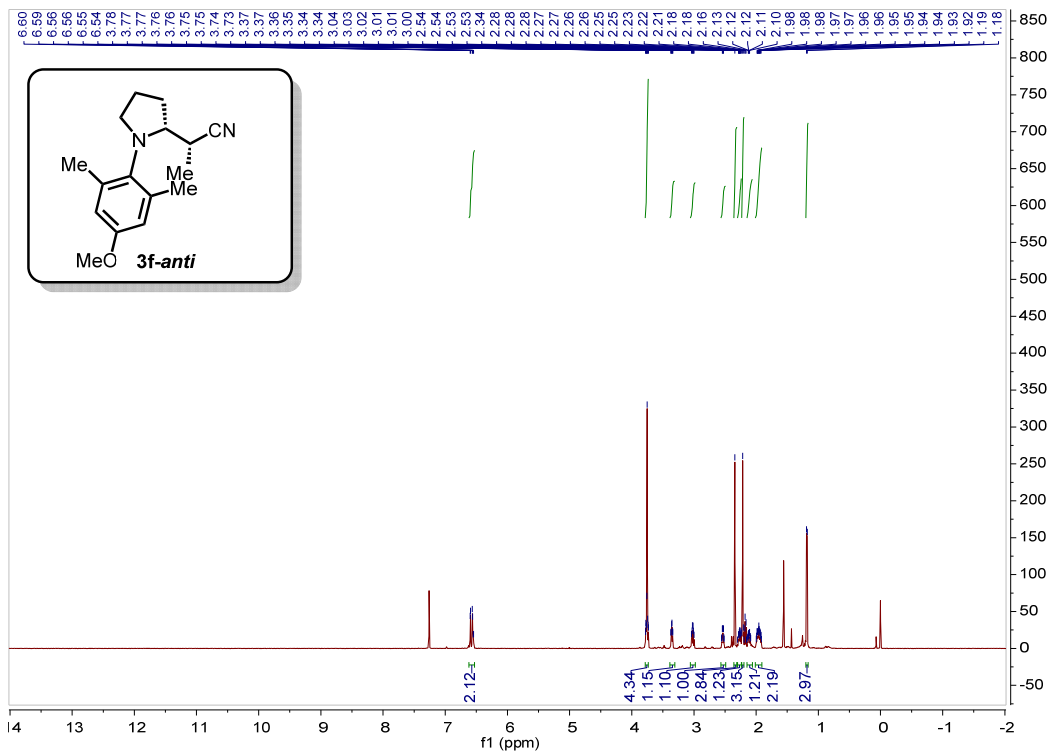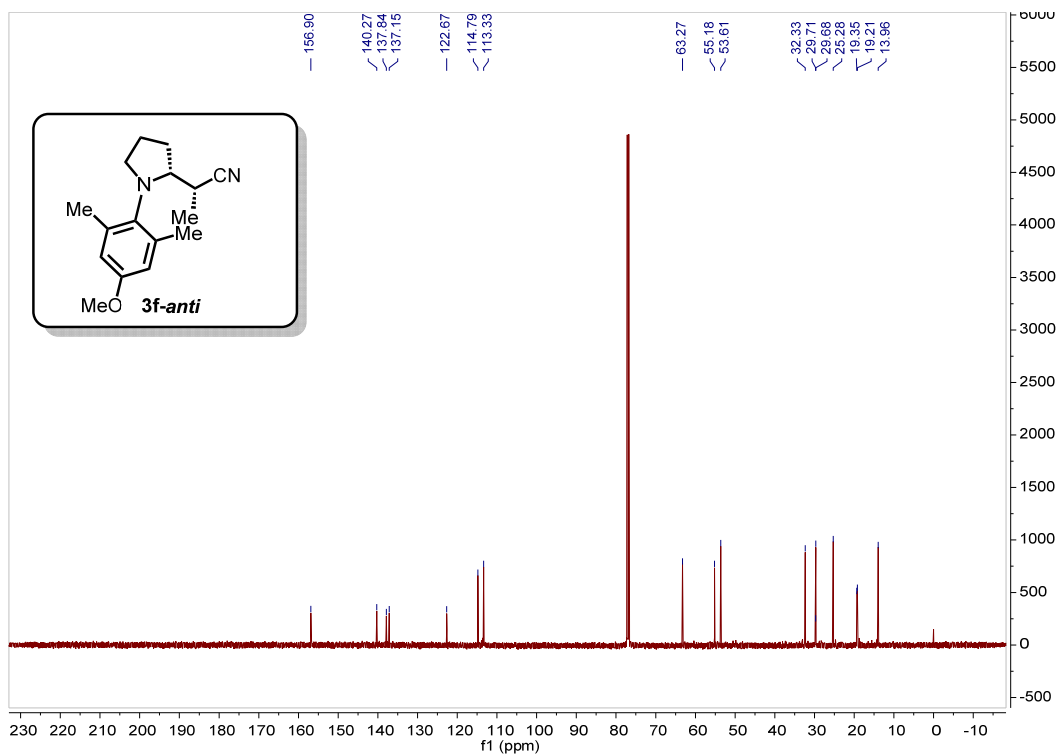

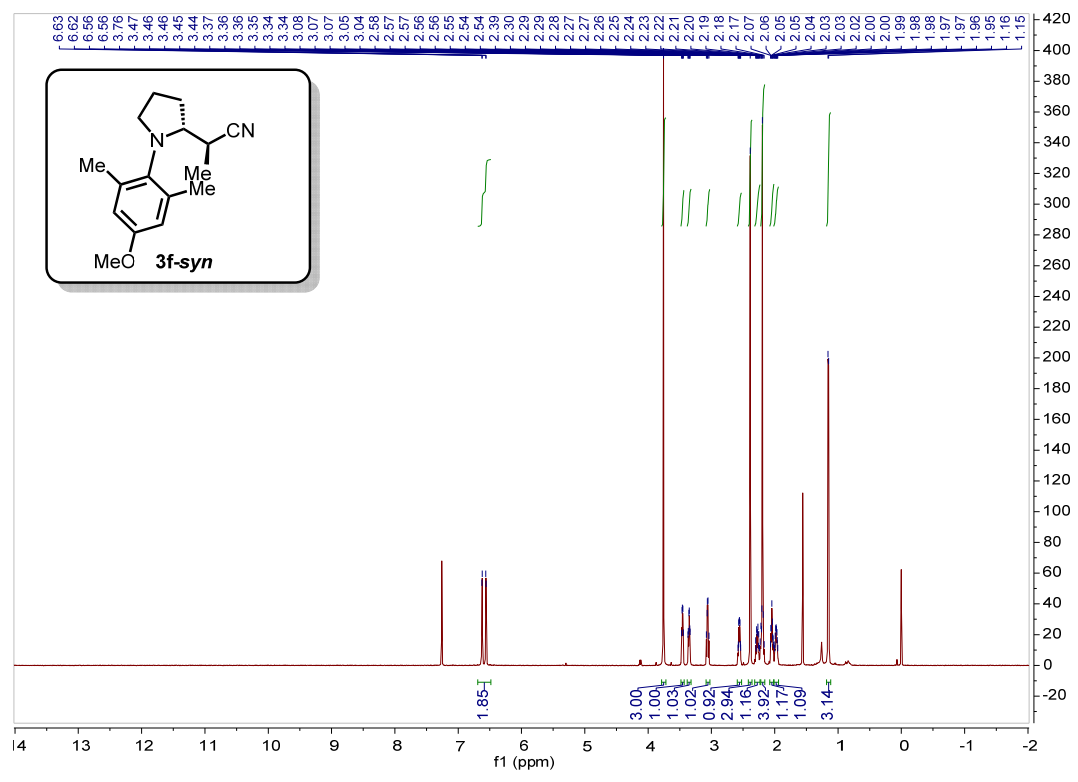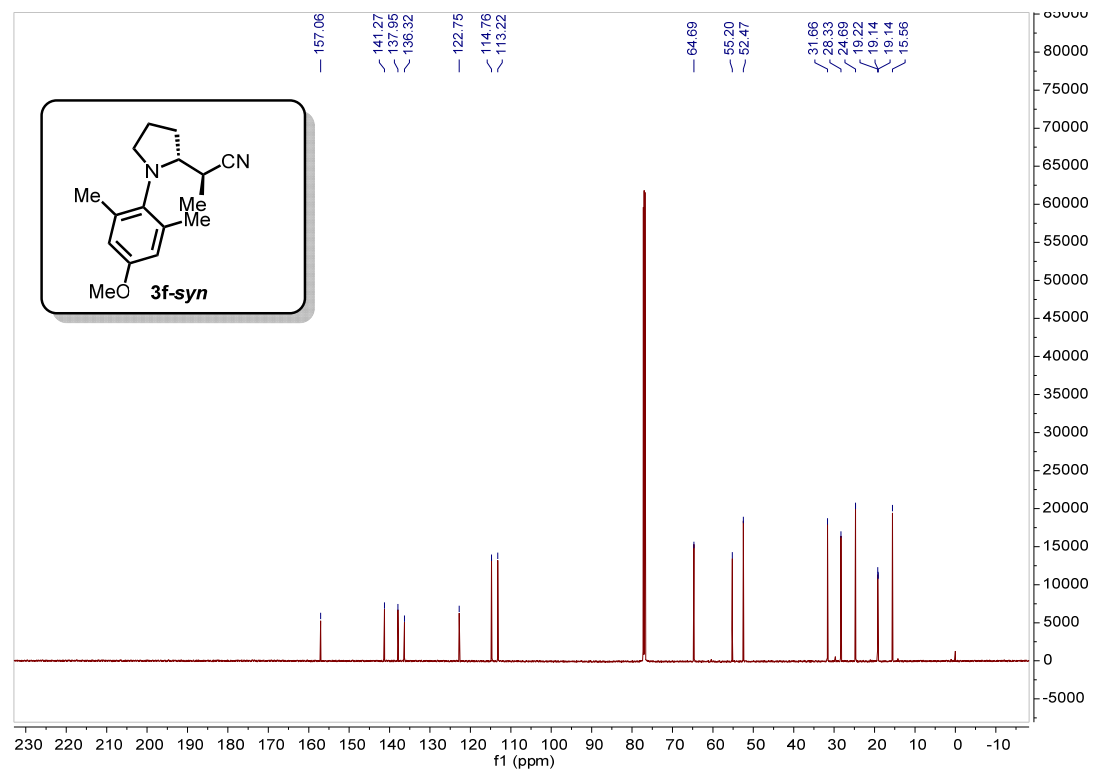

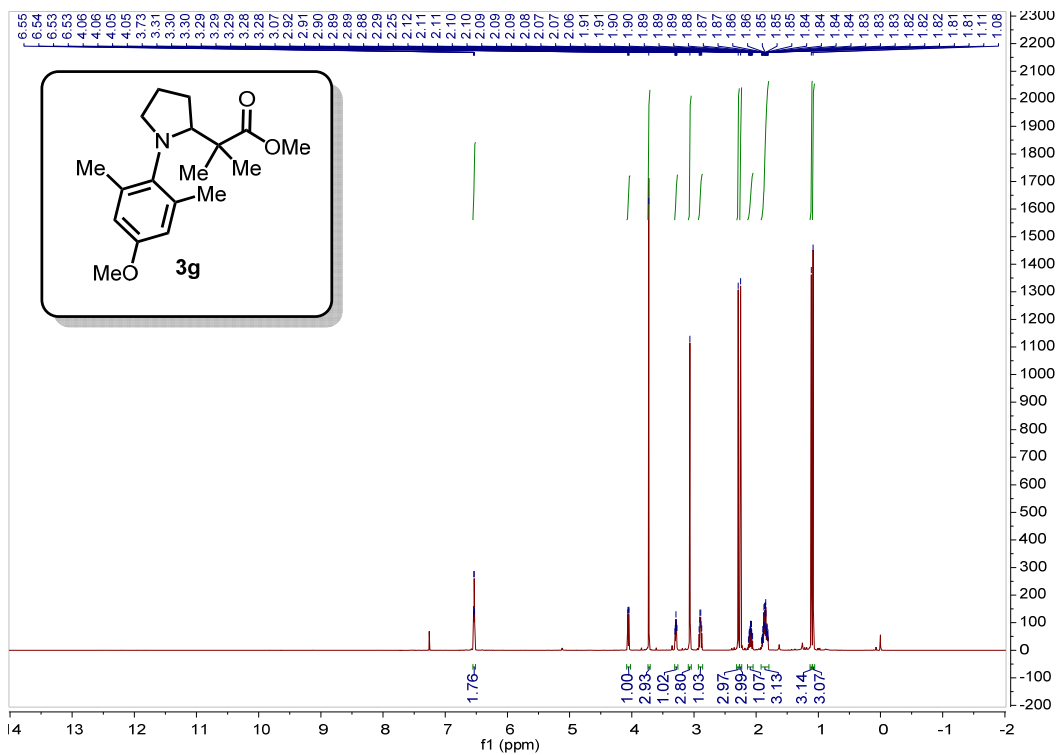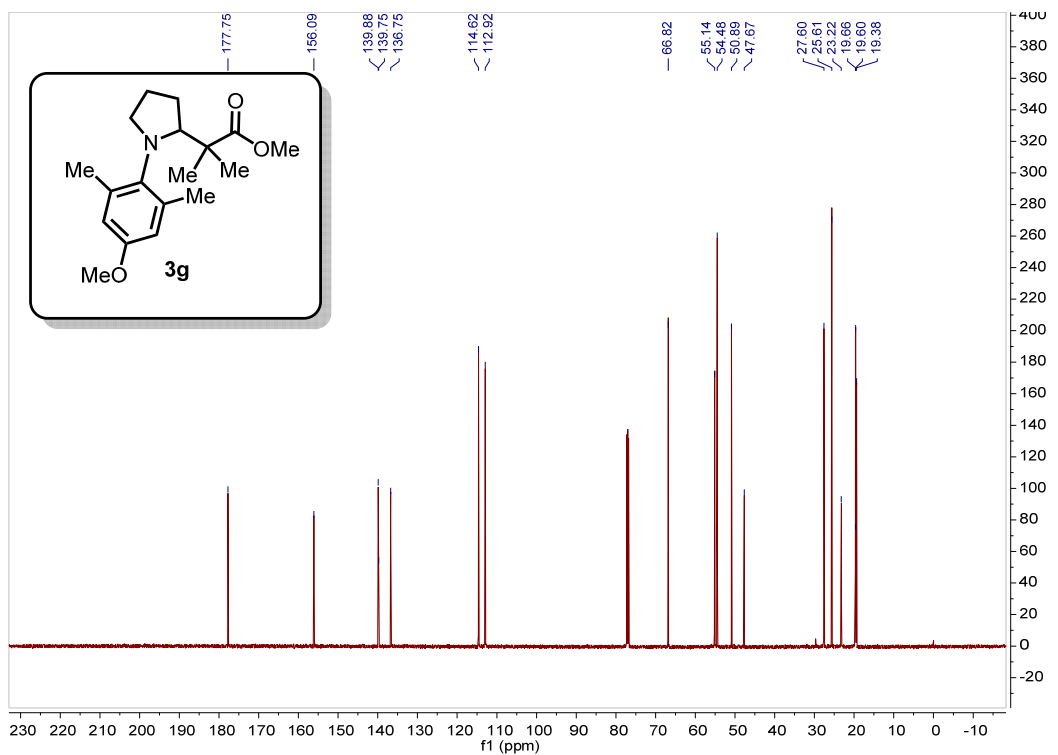

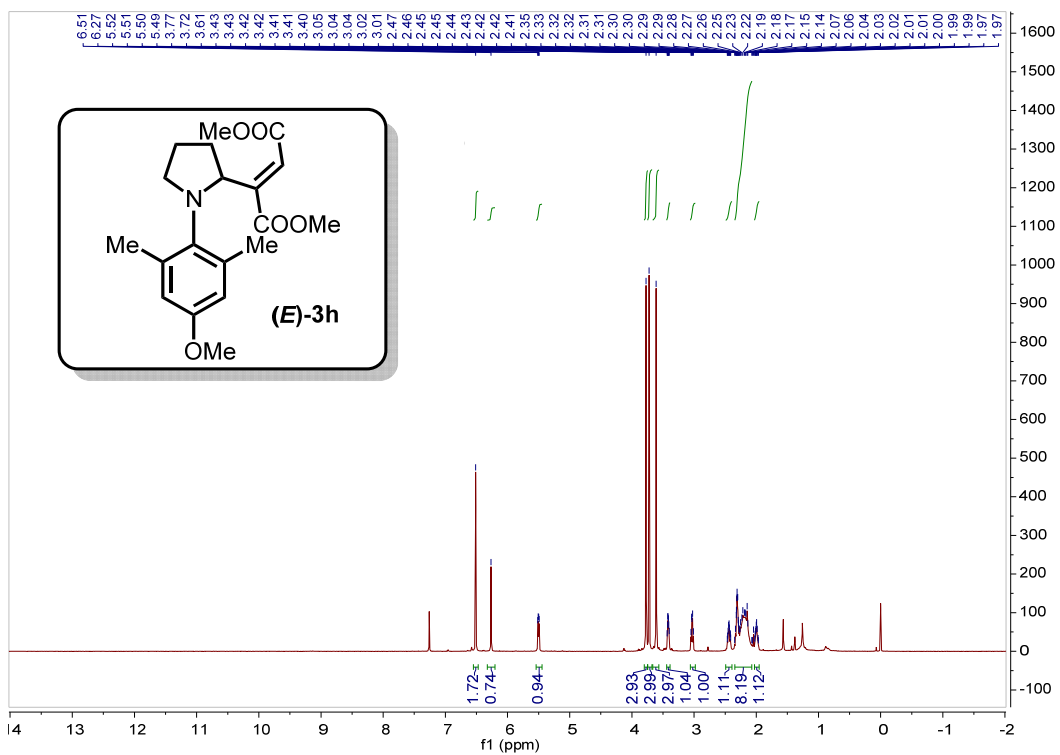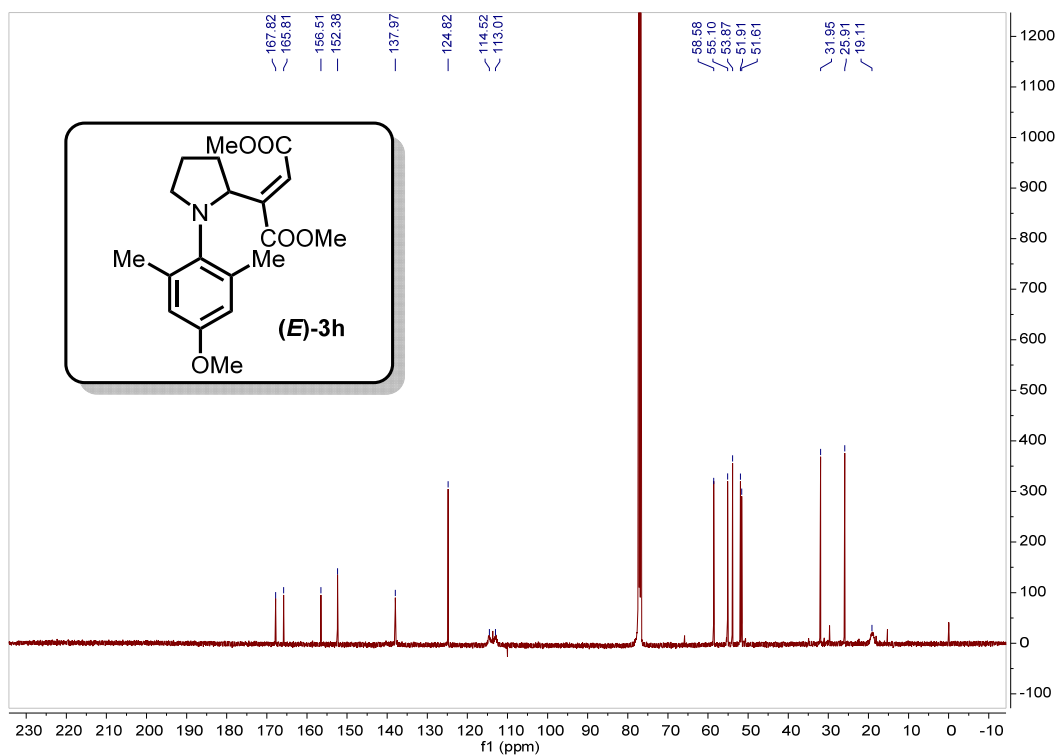

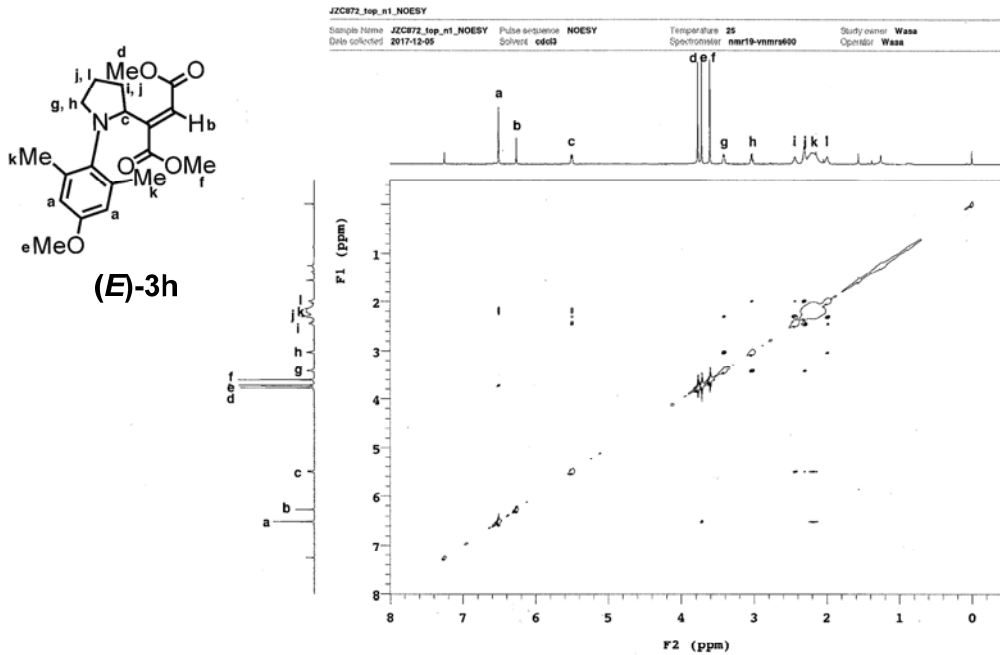

Data file #foms\ALL\Wasa\Users\waj\JZC872\_top\_n1\_NOESY.kf

Plot date 2017-12-06

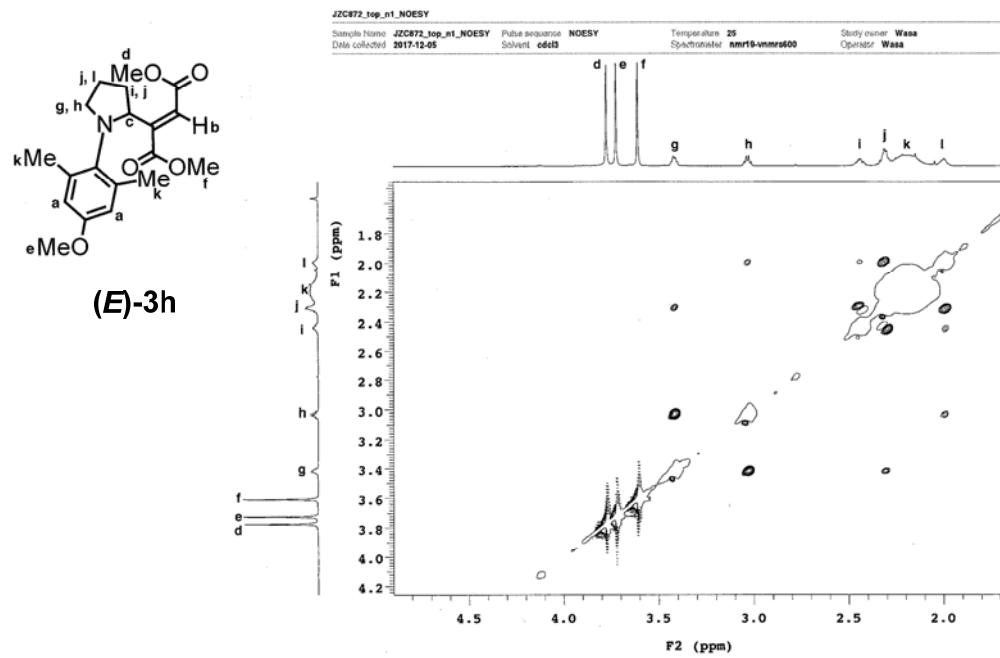

Data file #foms\ALL\Wasa\Users\waj\JZC872\_top\_n1\_NOESY.kf

Plot date 2017-12-06



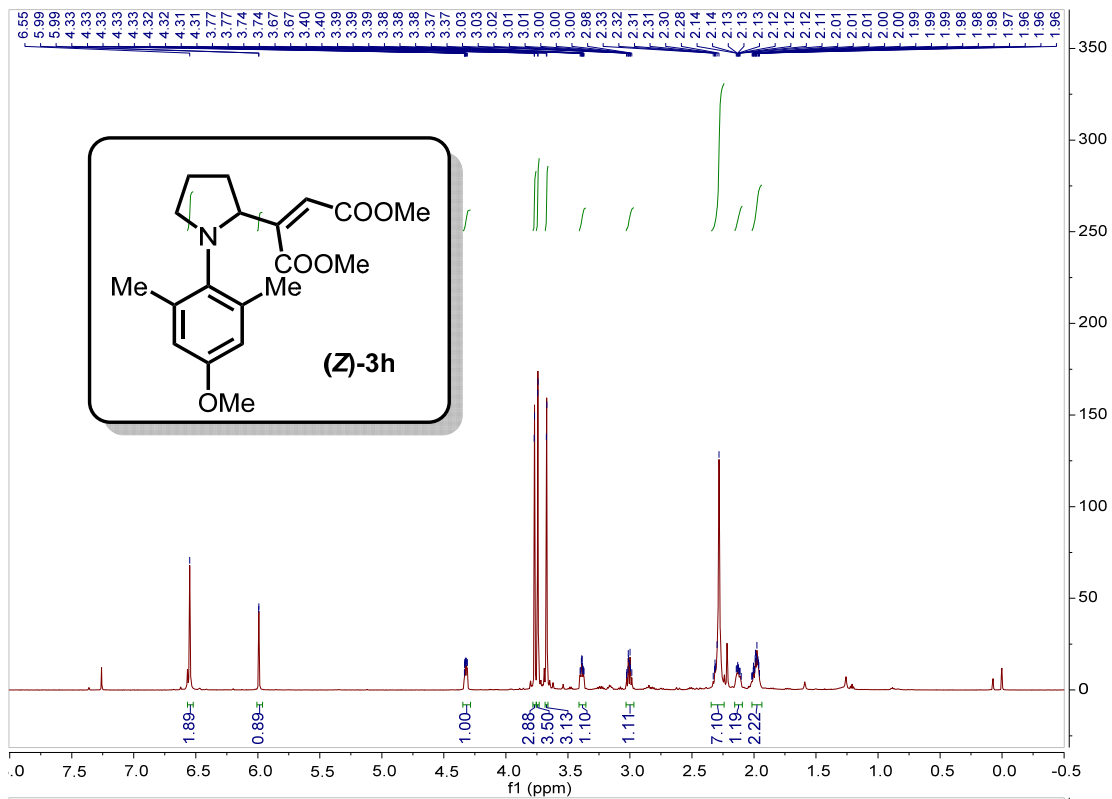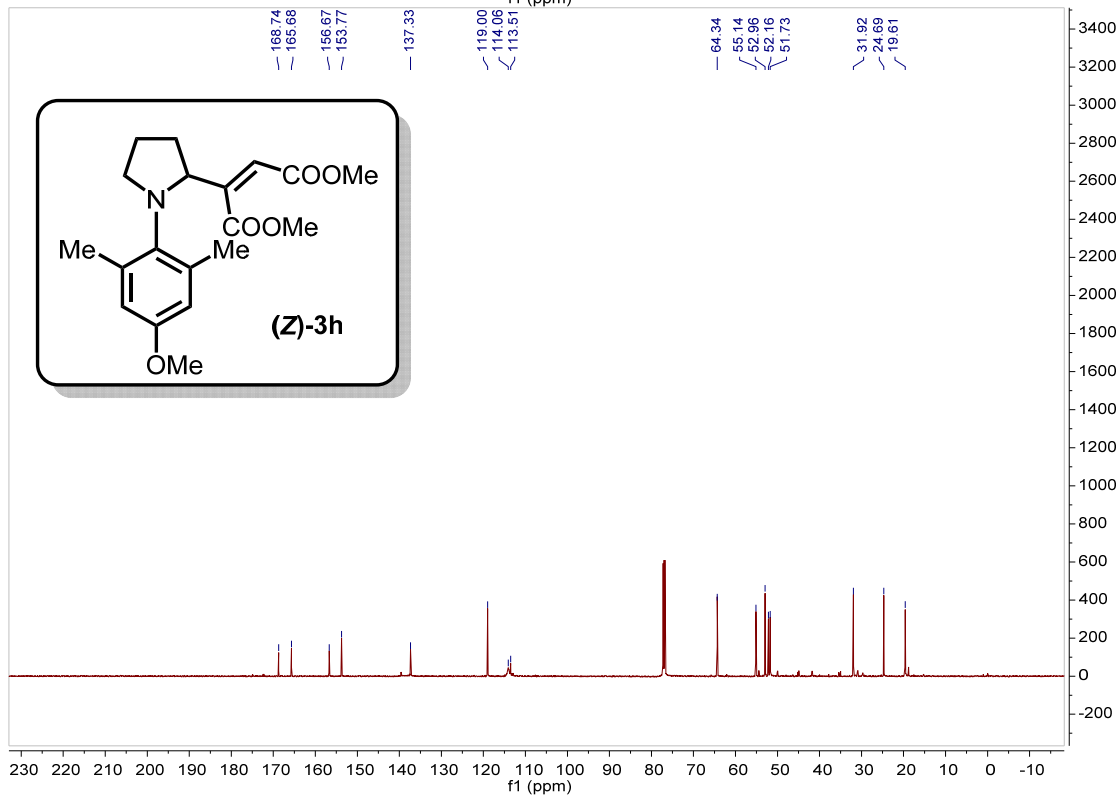

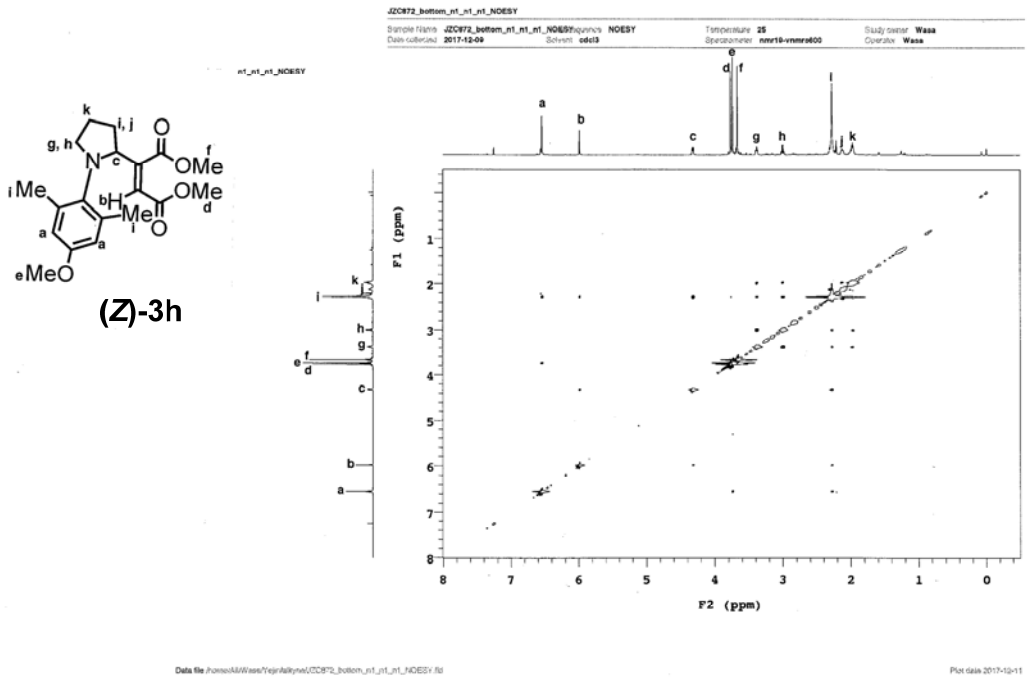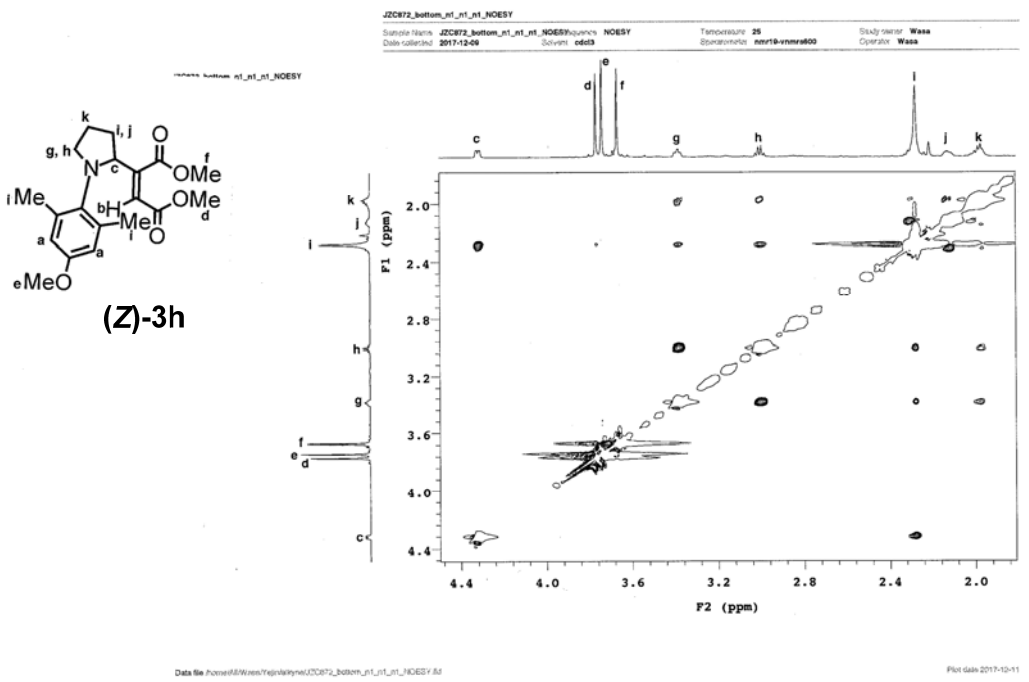

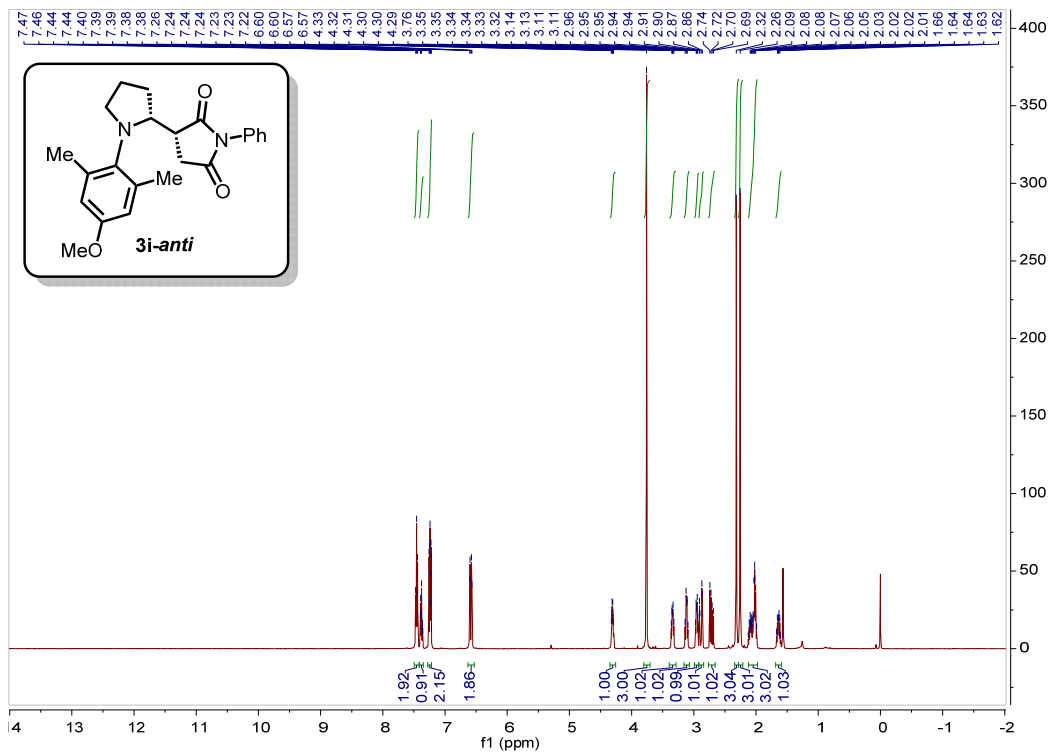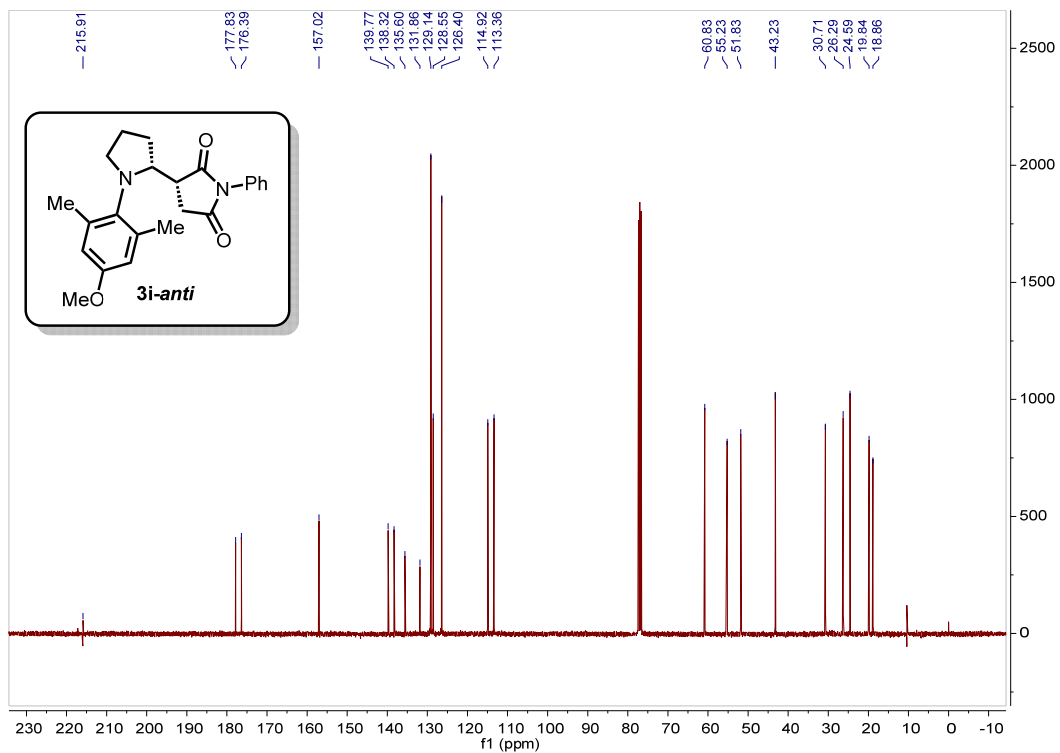

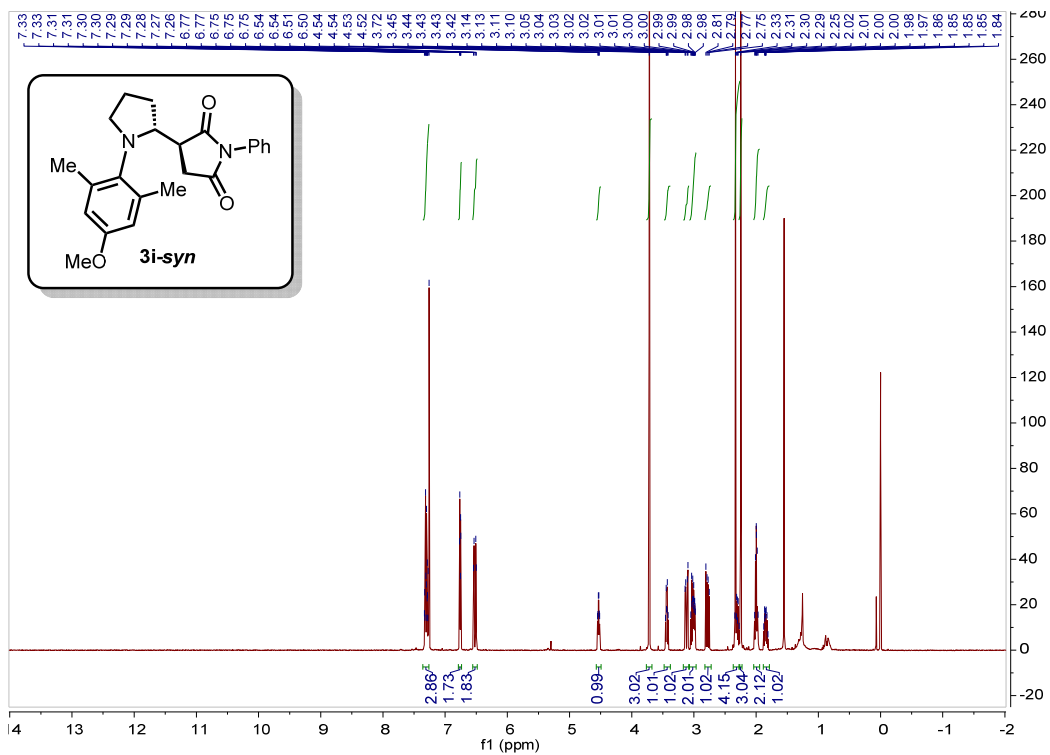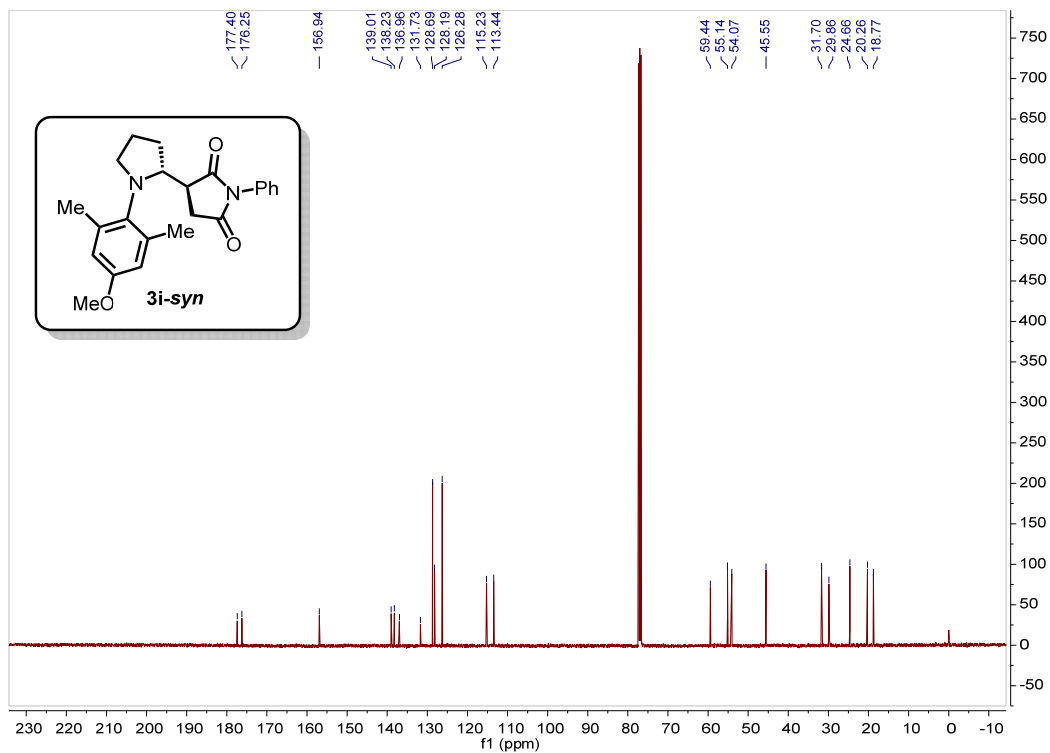

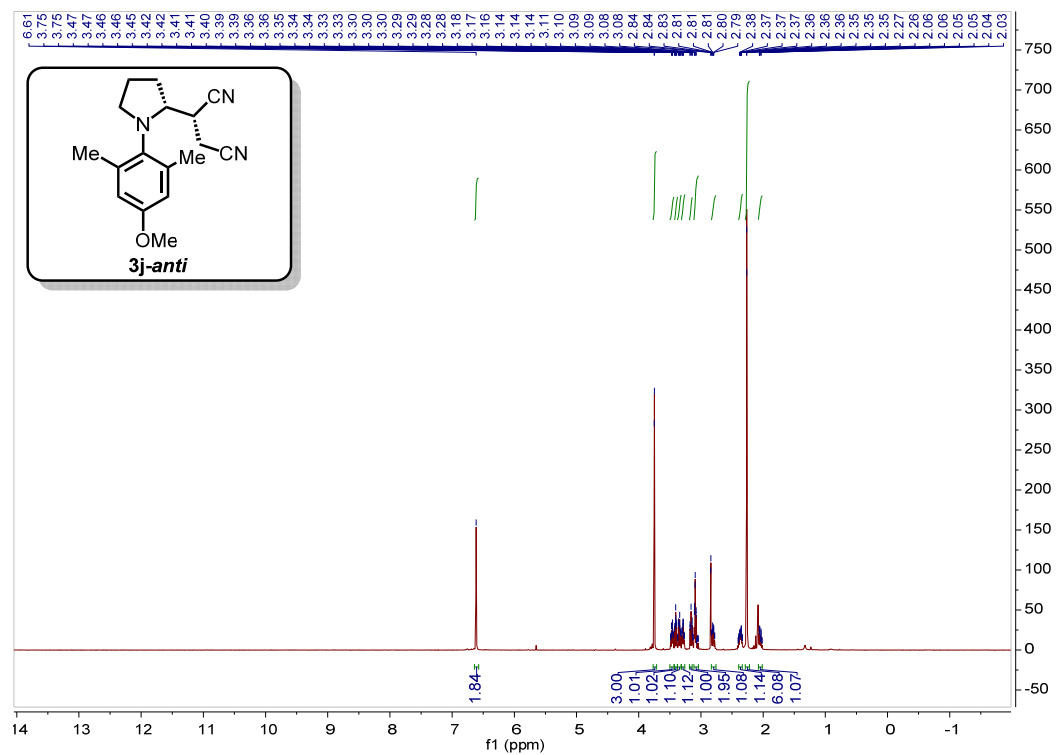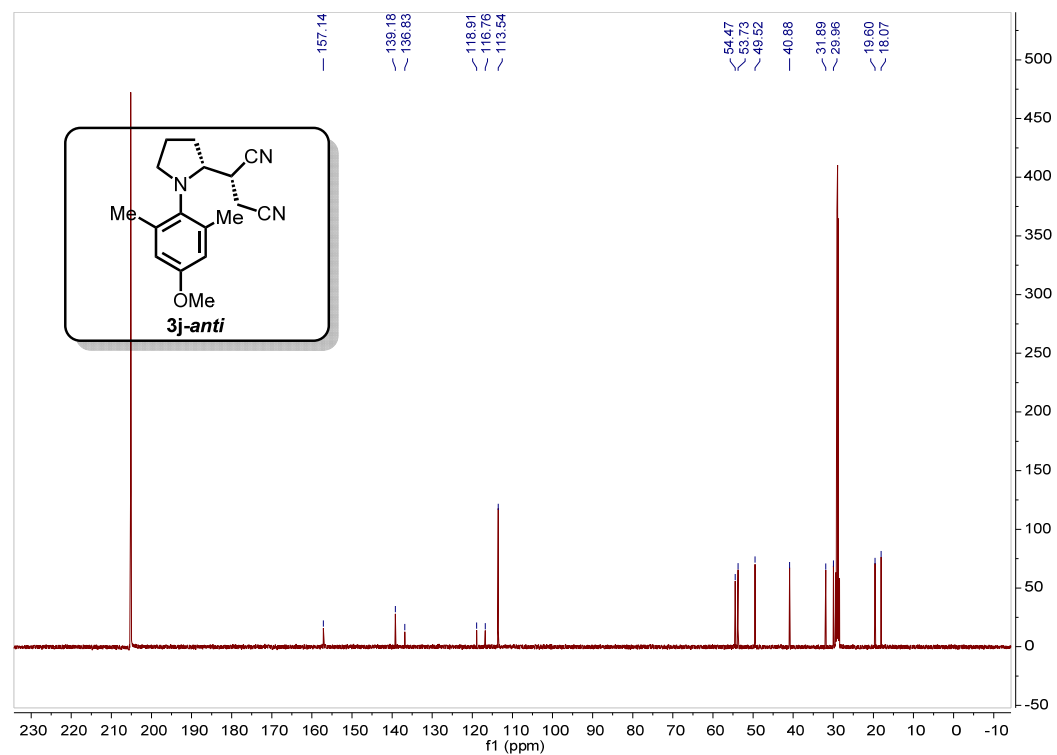



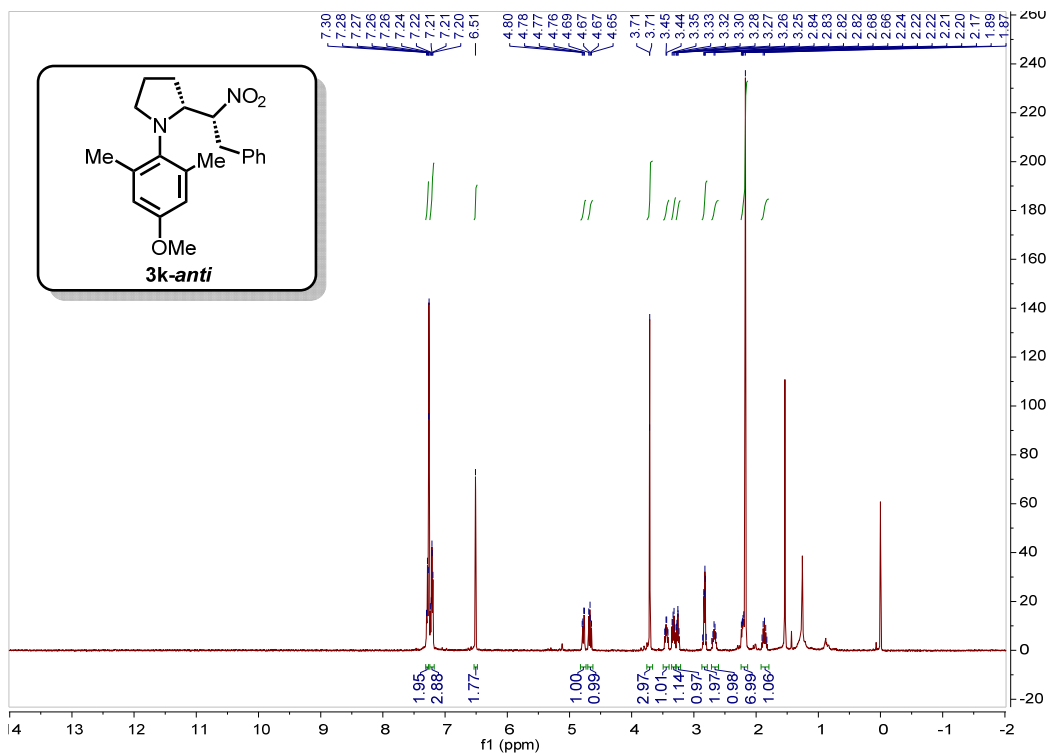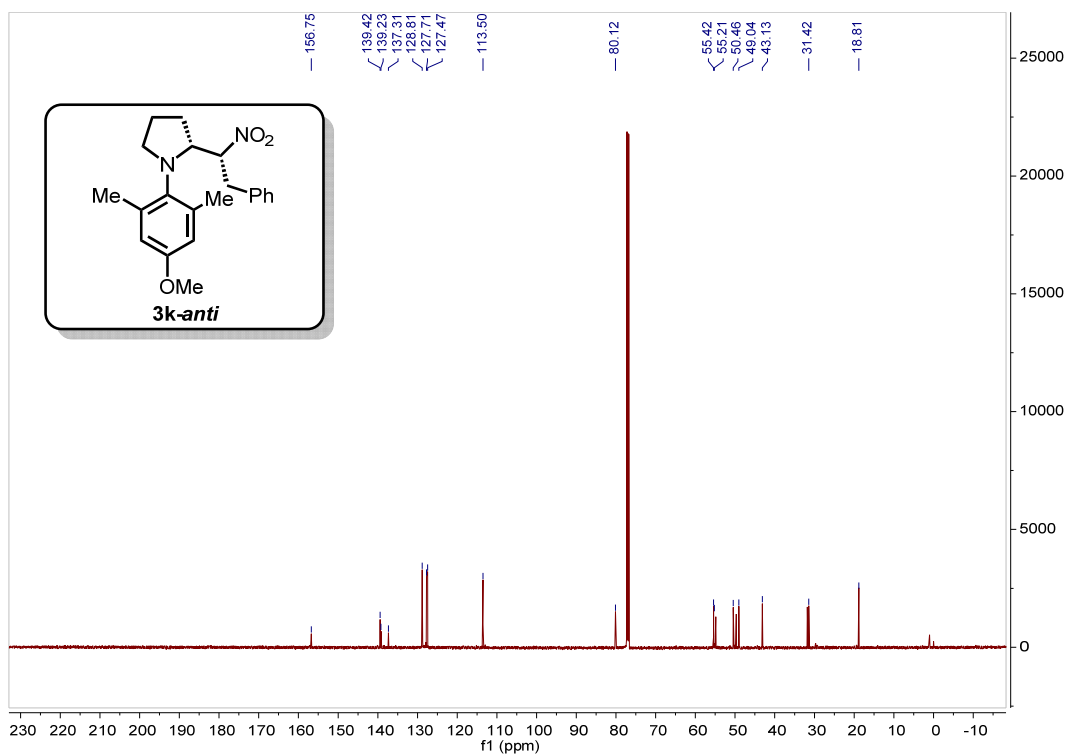

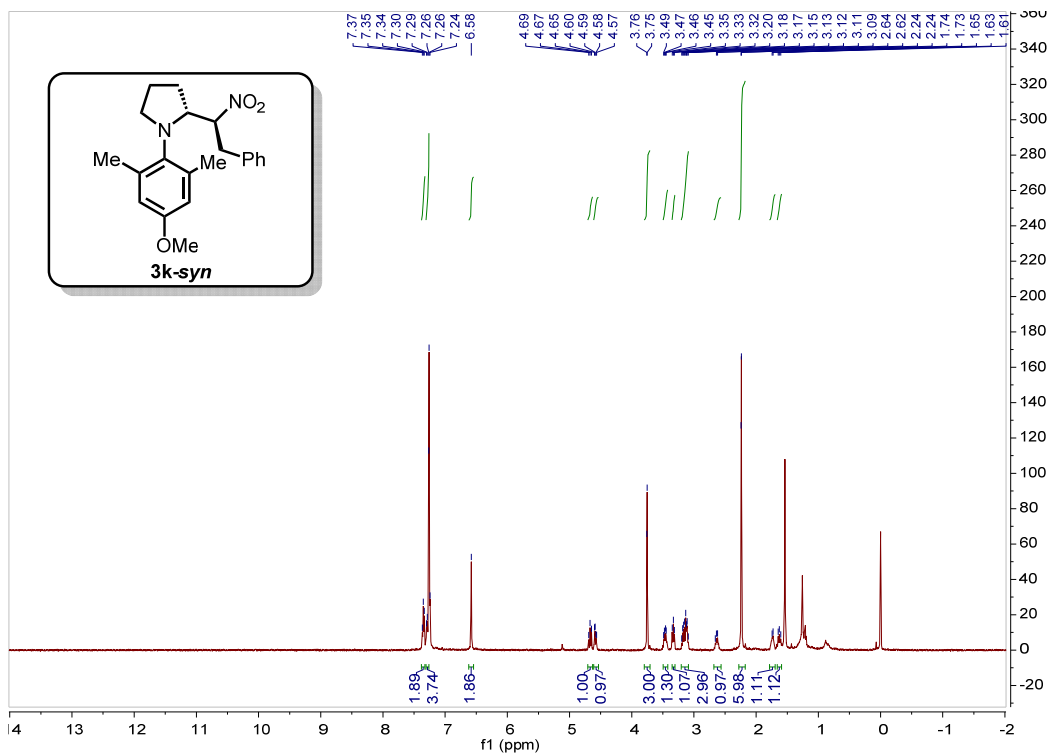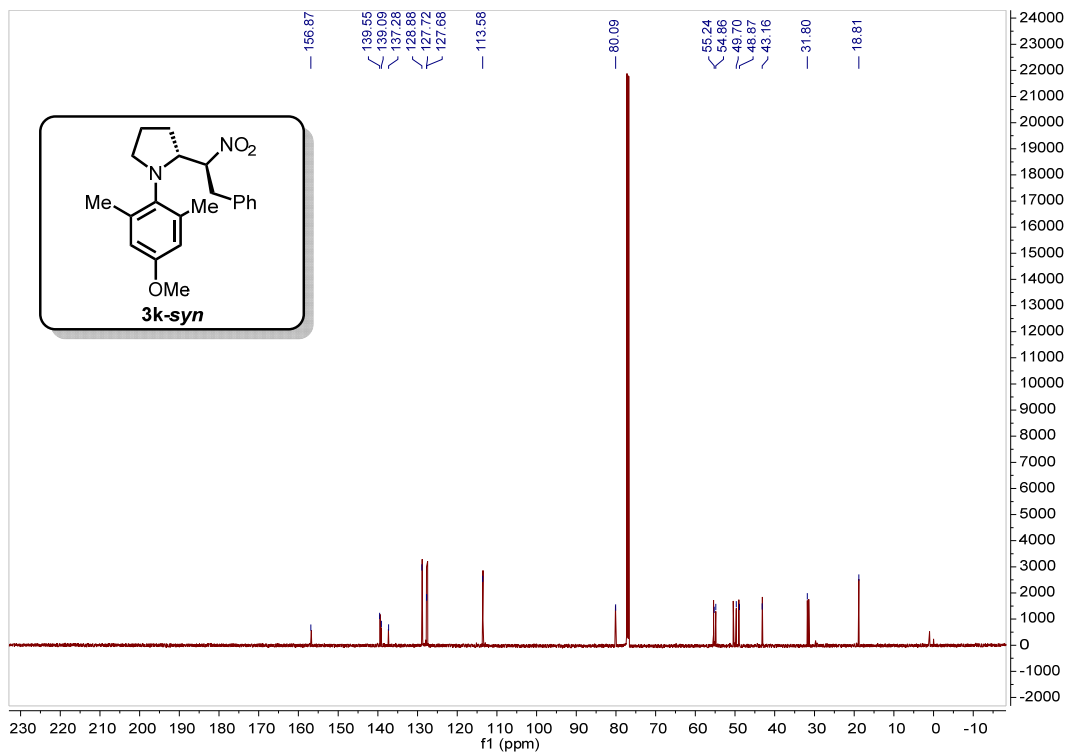





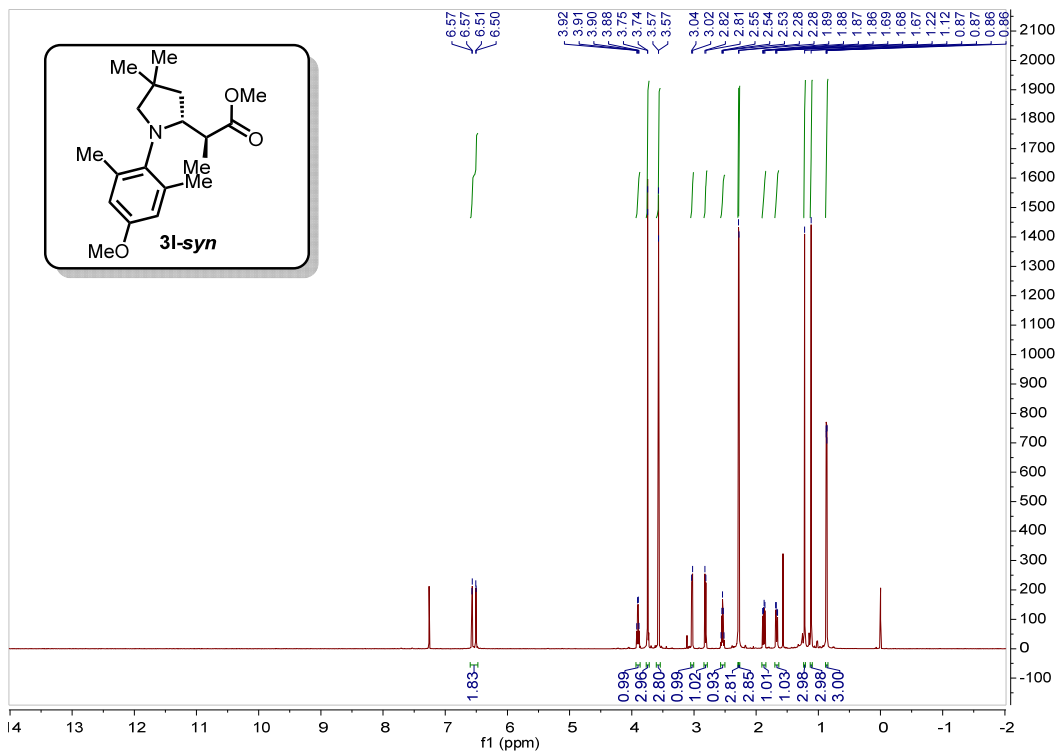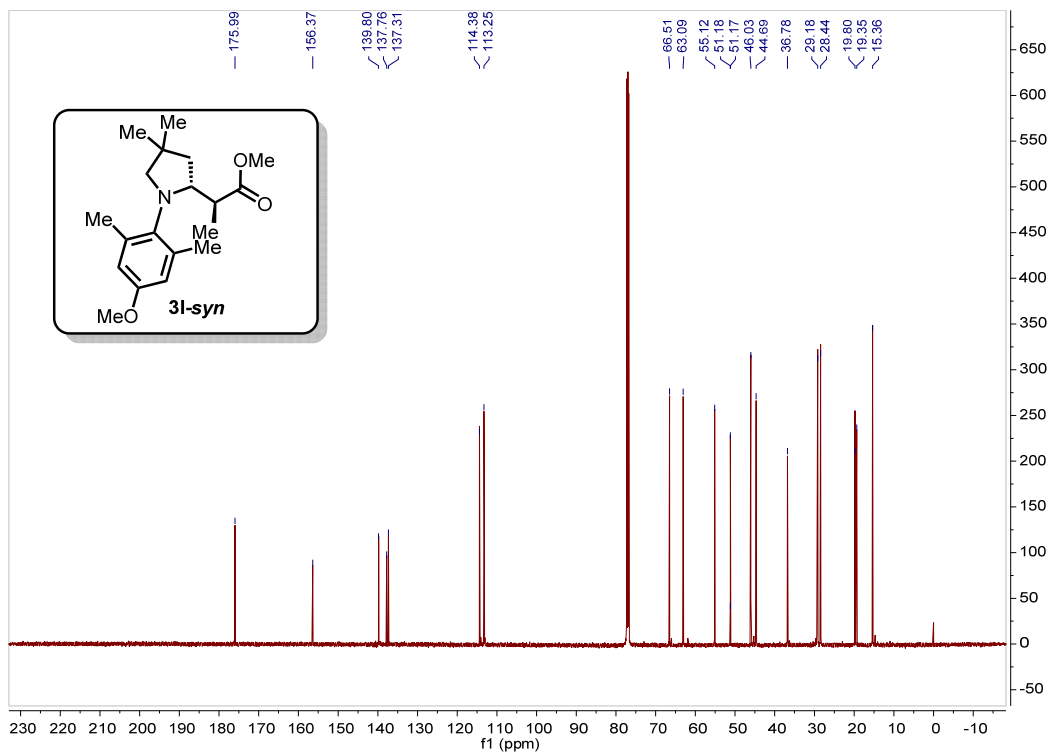

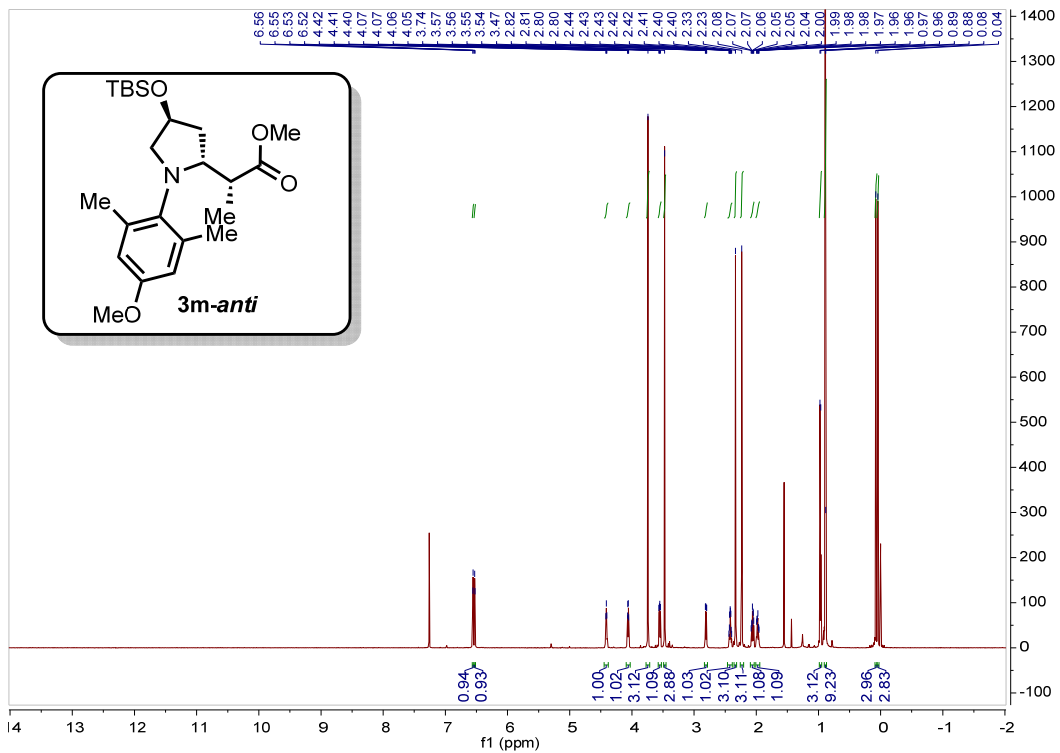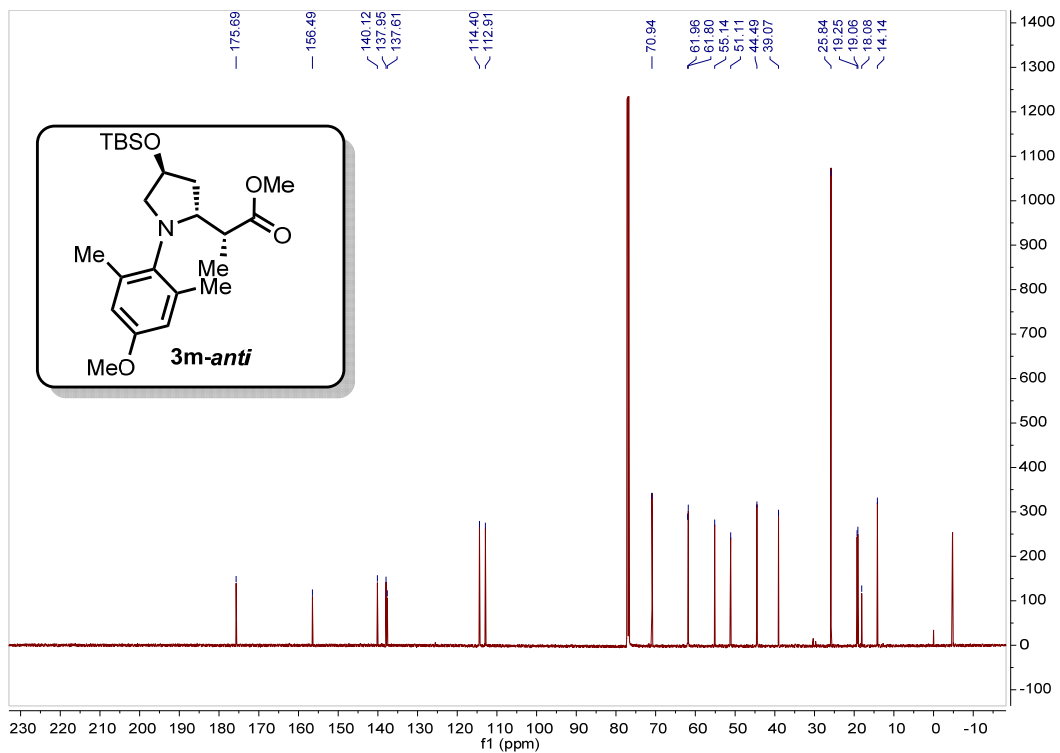

3o\_dia3\_NOESY

Sample Name: 3o\_dia3\_NOESY Pulse Sequence: NOESY Temperature: 25  
Data collected: 2017-12-04 Solvent: ddg3 Spectrometer: nmr1B-vnmr500 Study Director: Wassa  
Operator: Wassa

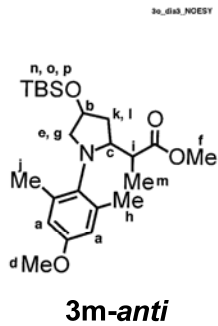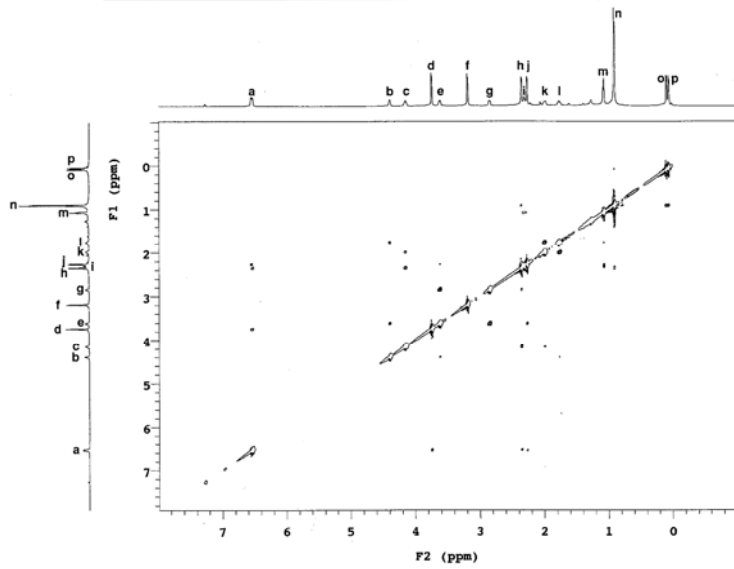

Data file: Home\RMW\Wass\Tep\3o\_dia3\_NOESY.f2

Plot date: 2017-12-05

3o\_dia3\_NOESY

Sample Name: 3o\_dia3\_NOESY Pulse Sequence: NOESY Temperature: 25  
Data collected: 2017-12-04 Solvent: ddg3 Spectrometer: nmr1B-vnmr500 Study Director: Wassa  
Operator: Wassa

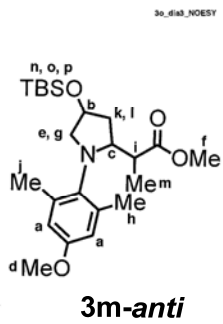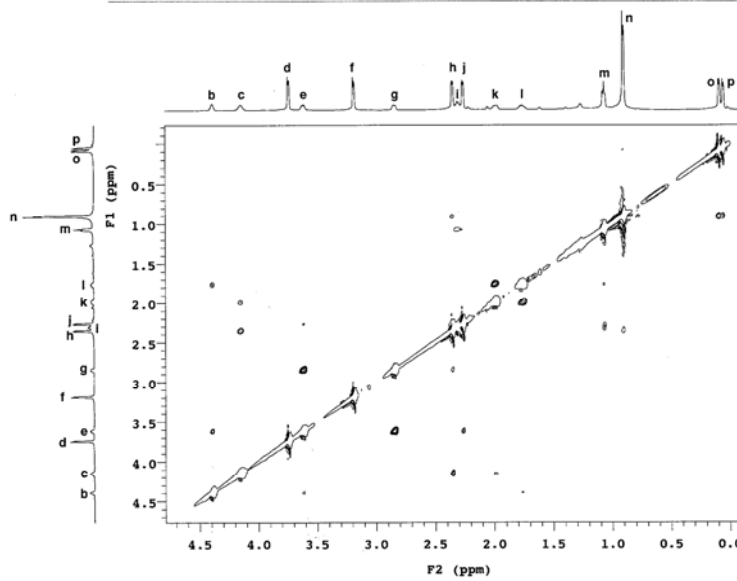

Data file: Home\RMW\Wass\Tep\3o\_dia3\_NOESY.f2

Plot date: 2017-12-05

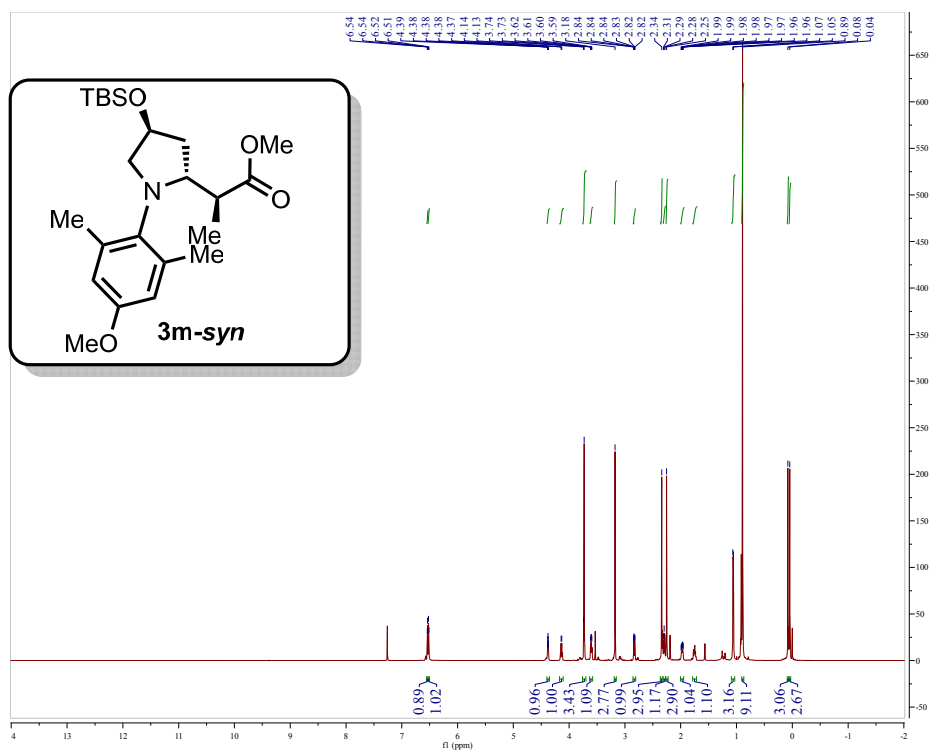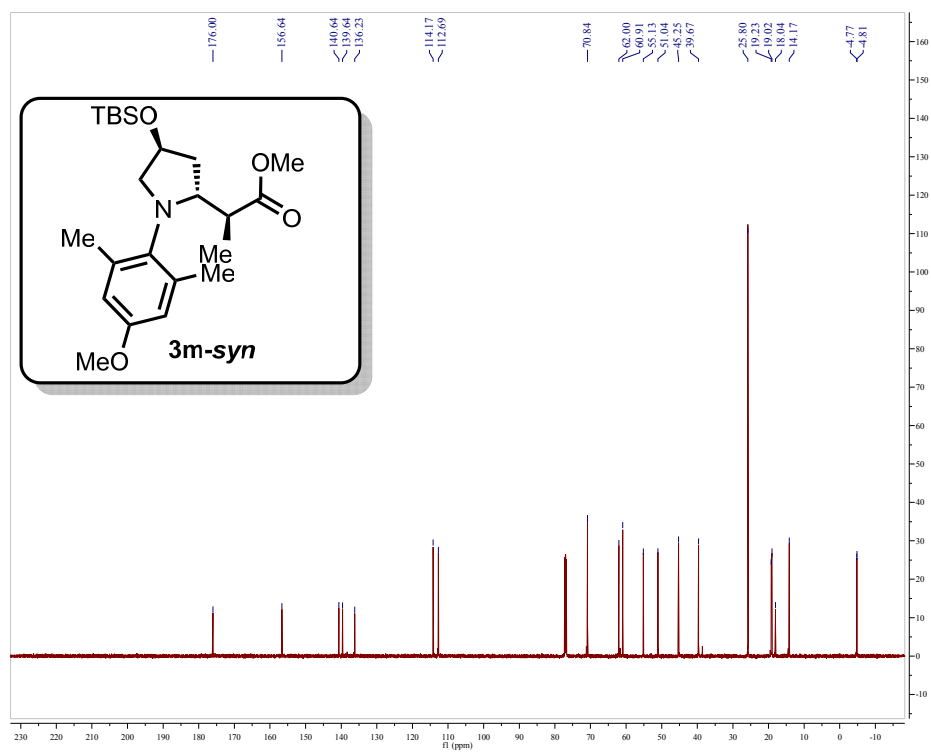

3o\_dlat\_PTLT\_chk\_NOESY

Sample Name 3o\_dlat\_PTLT\_chk\_NOESY File sequence NOESY Temperature 25  
Date collected 2017-12-02 Solvent cdcl3 Spectrometer nmr18-vnmr600 Study owner Wassa  
Operator Wassa

3o\_dlat\_PTLT\_chk\_NOESY

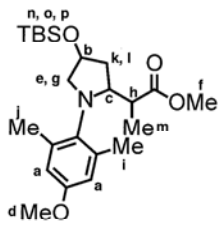

3m-syn

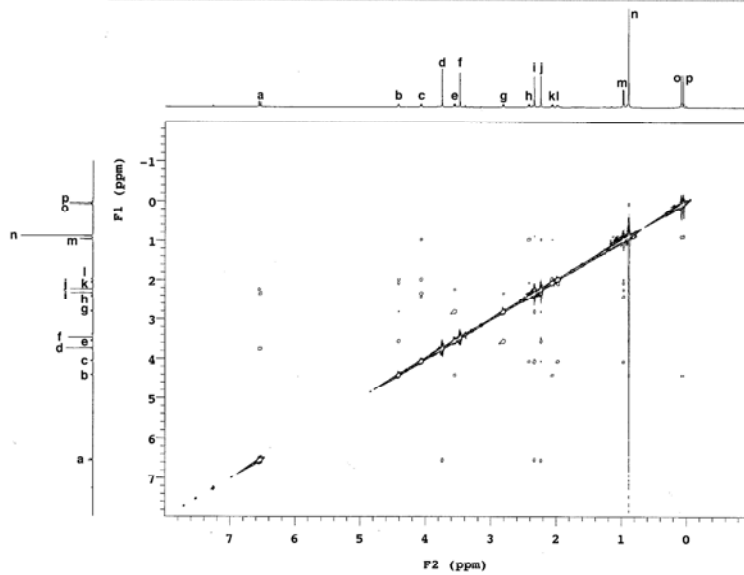

Data file from ALL/Wass/kerka3o\_dlat\_PTLT\_chk\_NOESY 01

Plot date 2017-12-04

3o\_dlat\_PTLT\_chk\_NOESY

Sample Name 3o\_dlat\_PTLT\_chk\_NOESY File sequence NOESY Temperature 25  
Date collected 2017-12-02 Solvent cdcl3 Spectrometer nmr18-vnmr600 Study owner Wassa  
Operator Wassa

3o\_dlat\_PTLT\_chk\_NOESY

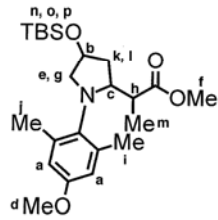

3m-syn

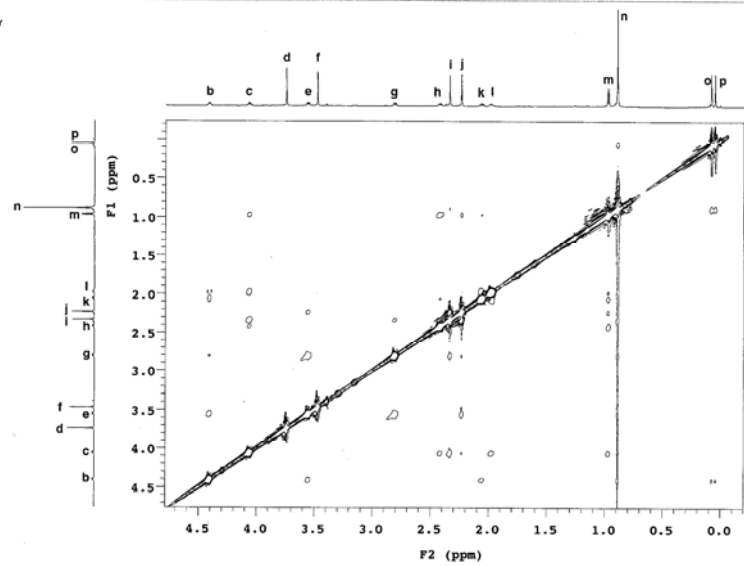

Data file from ALL/Wass/kerka3o\_dlat\_PTLT\_chk\_NOESY 01

Plot date 2017-12-04

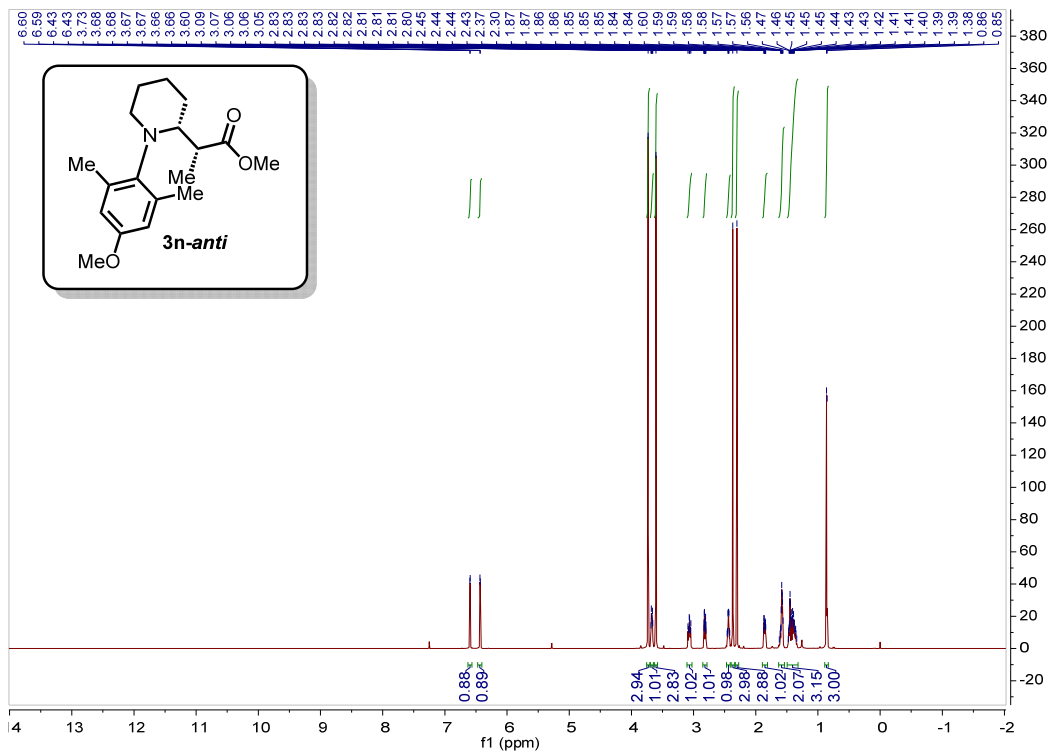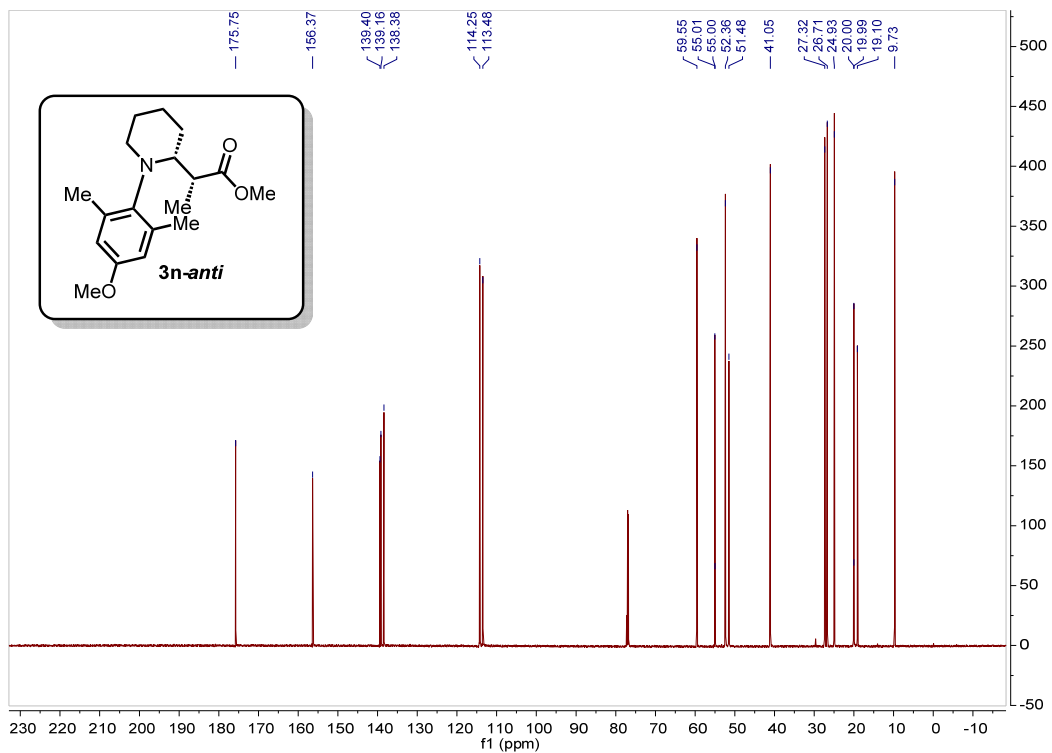







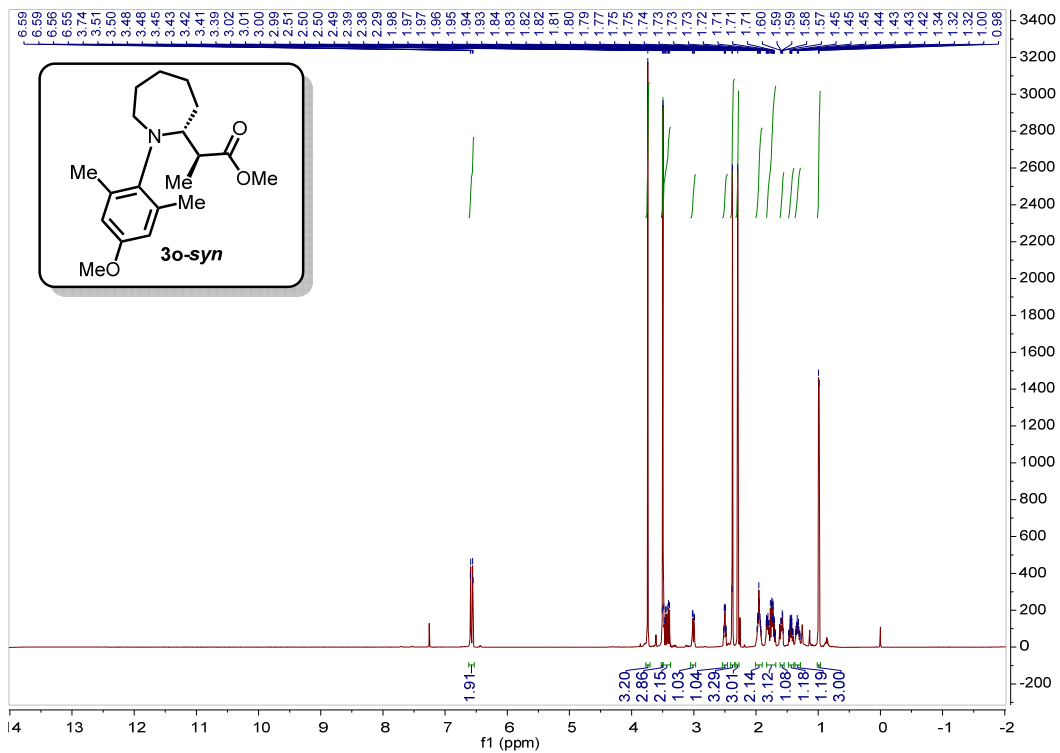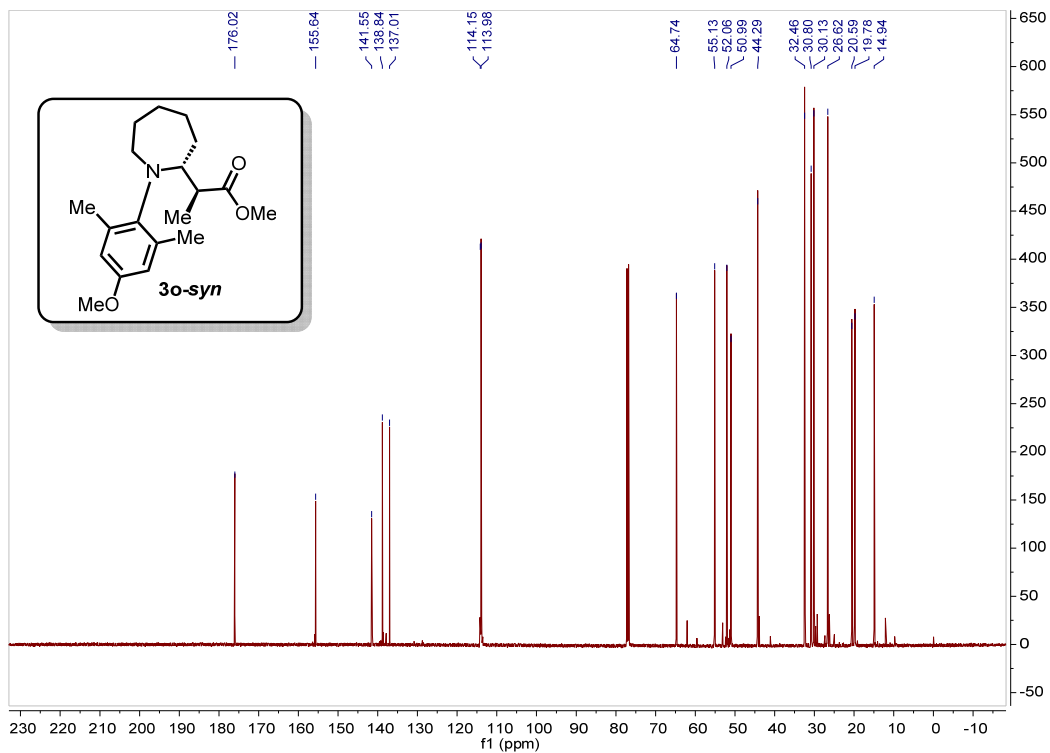

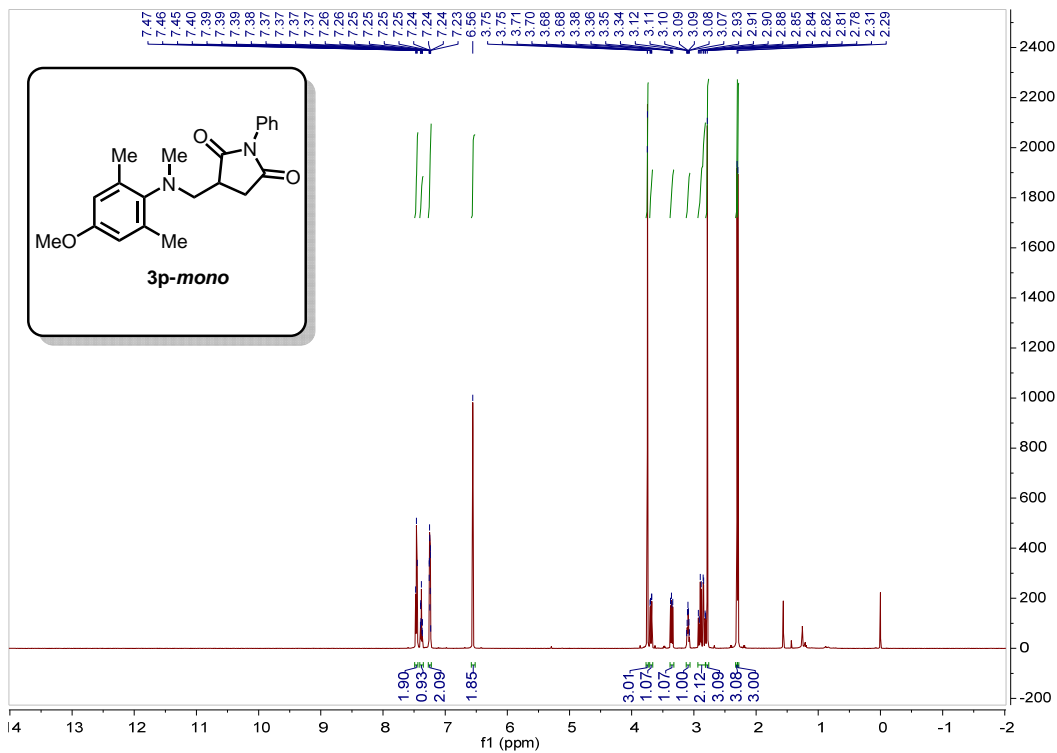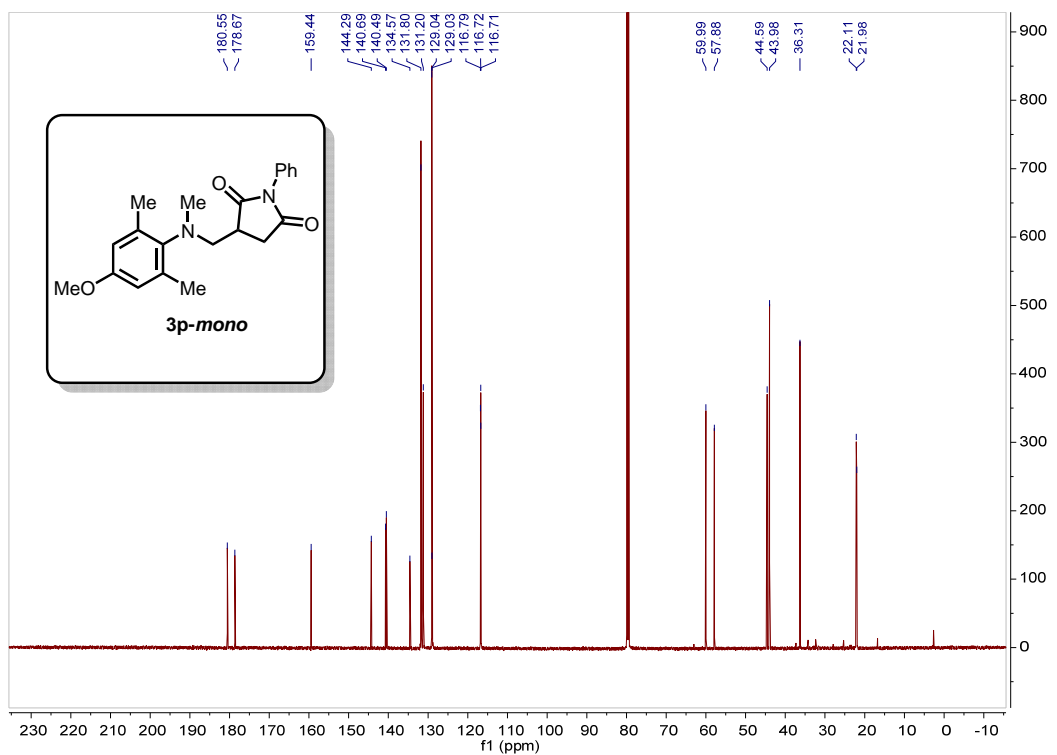

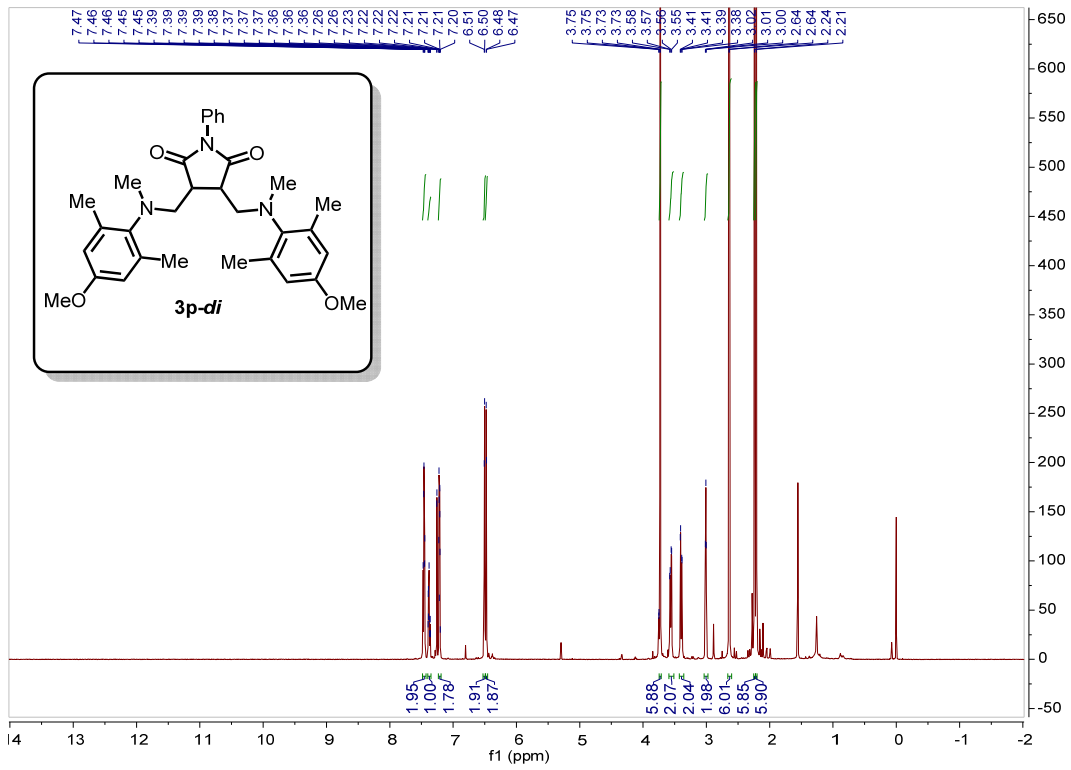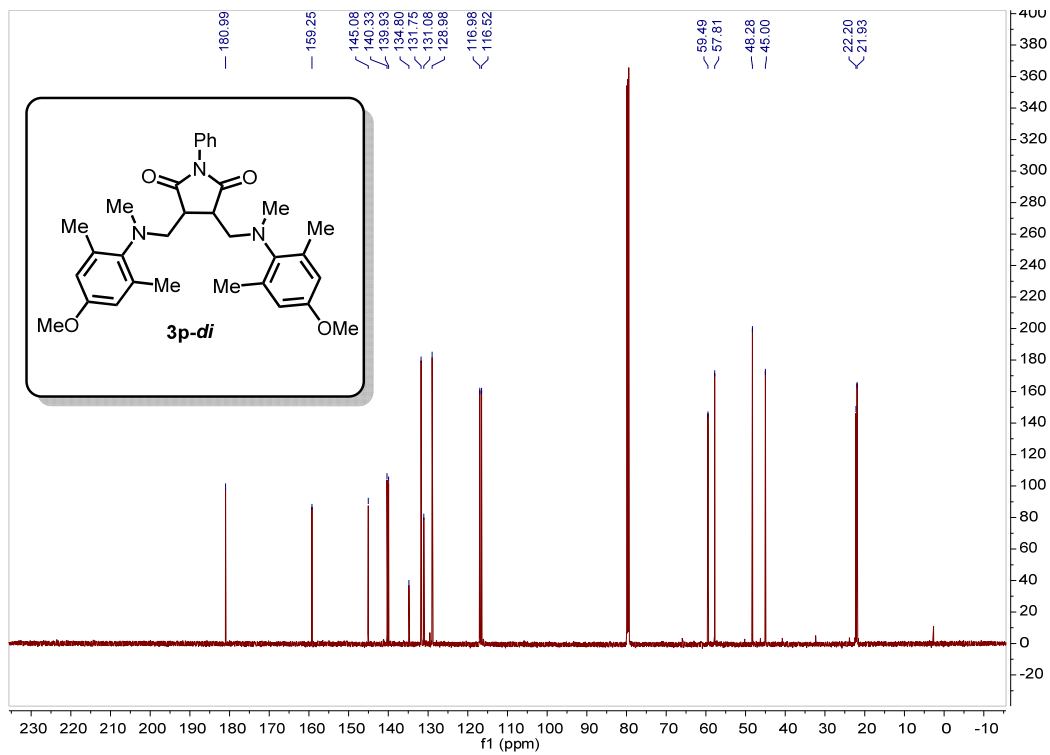

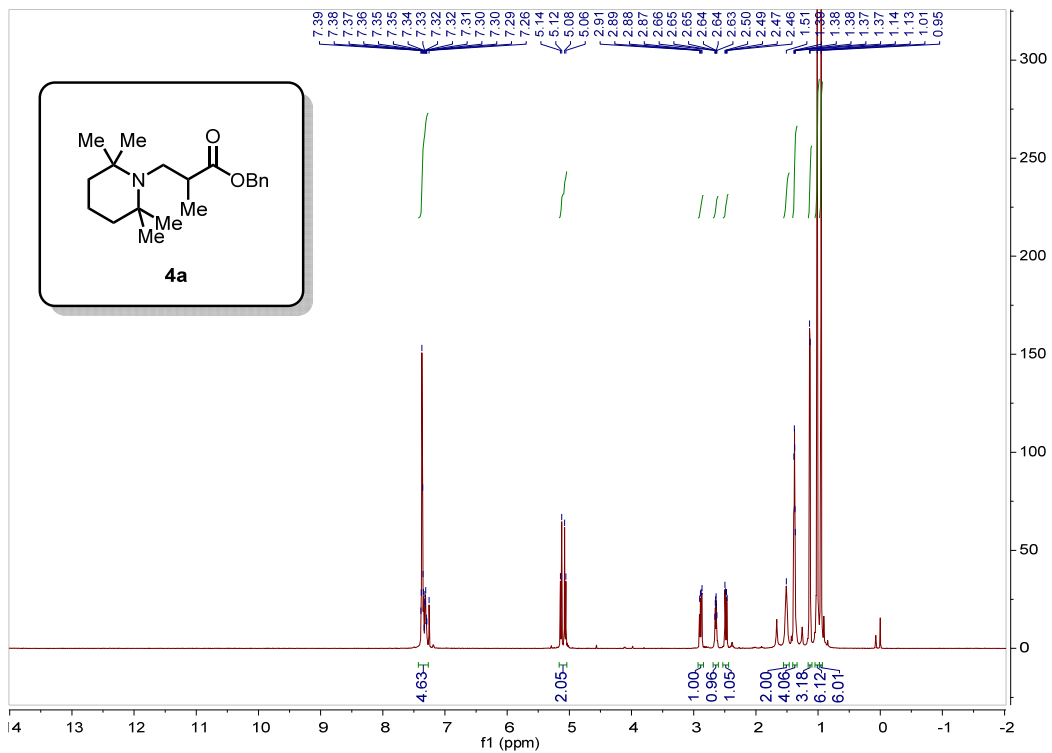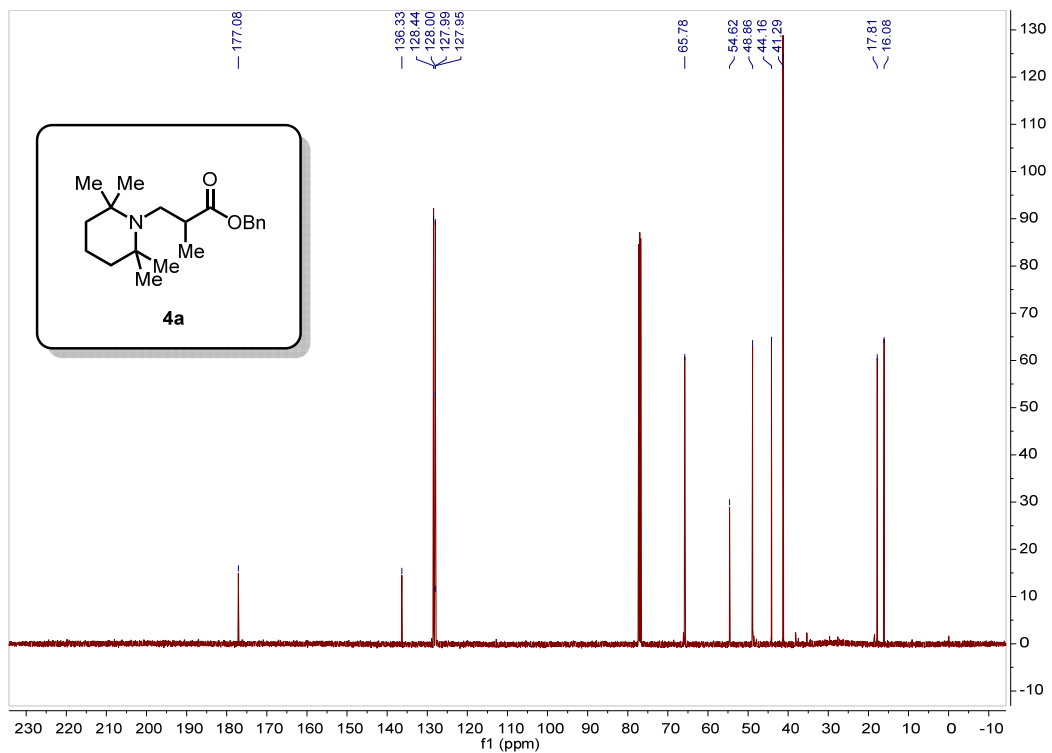

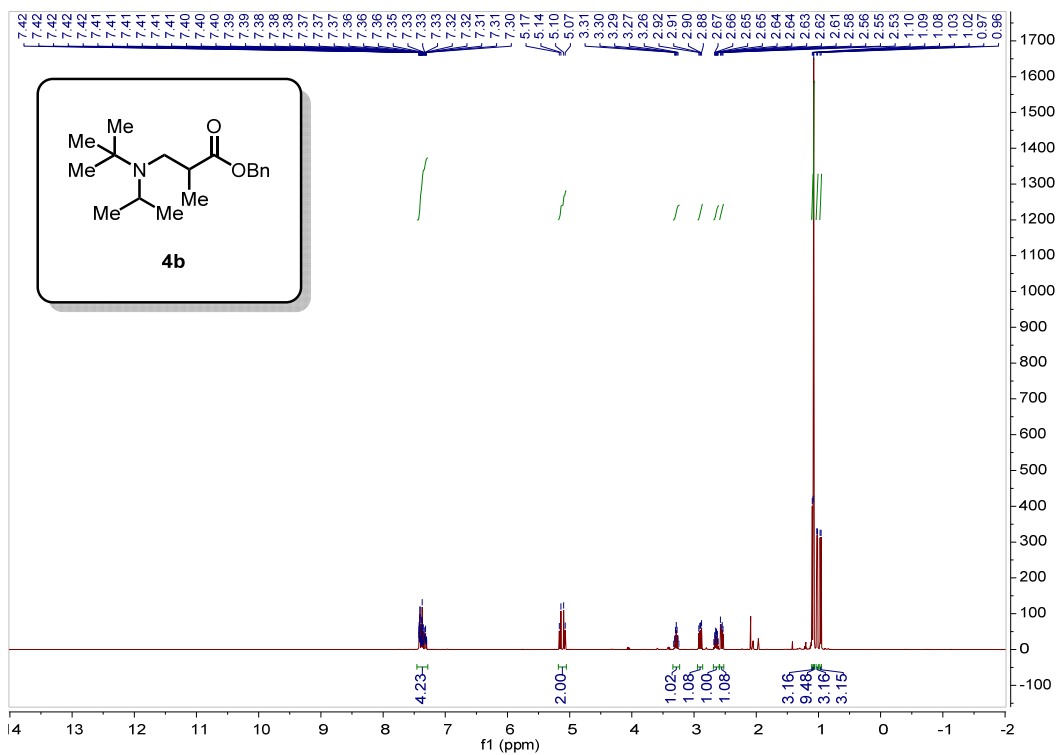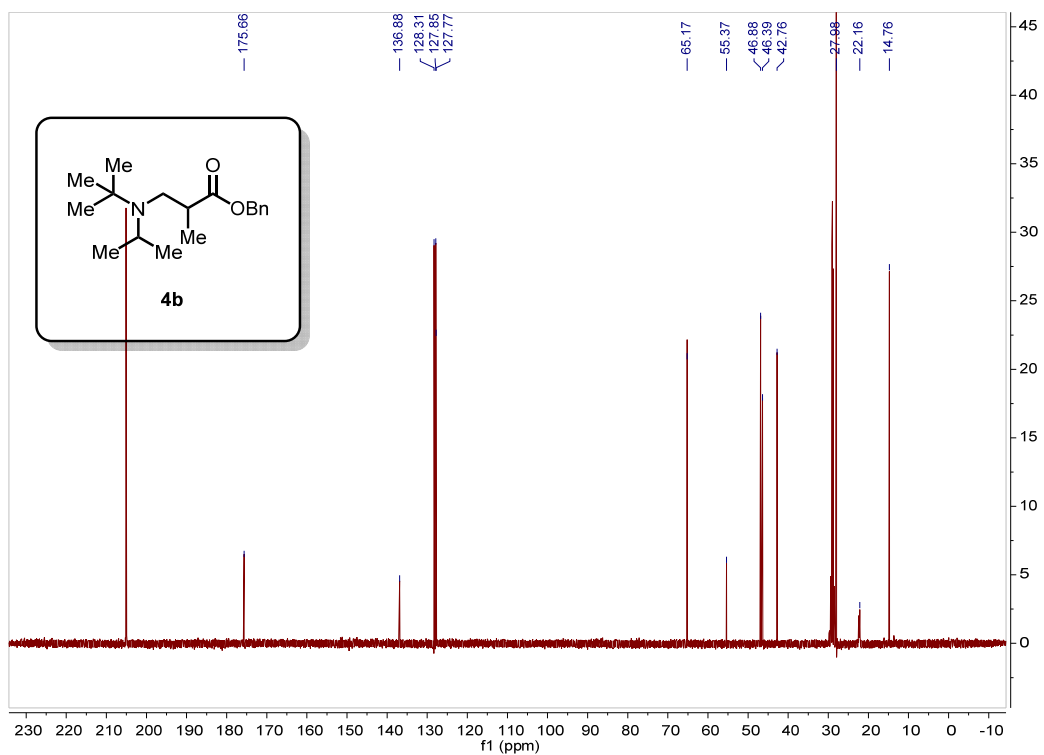



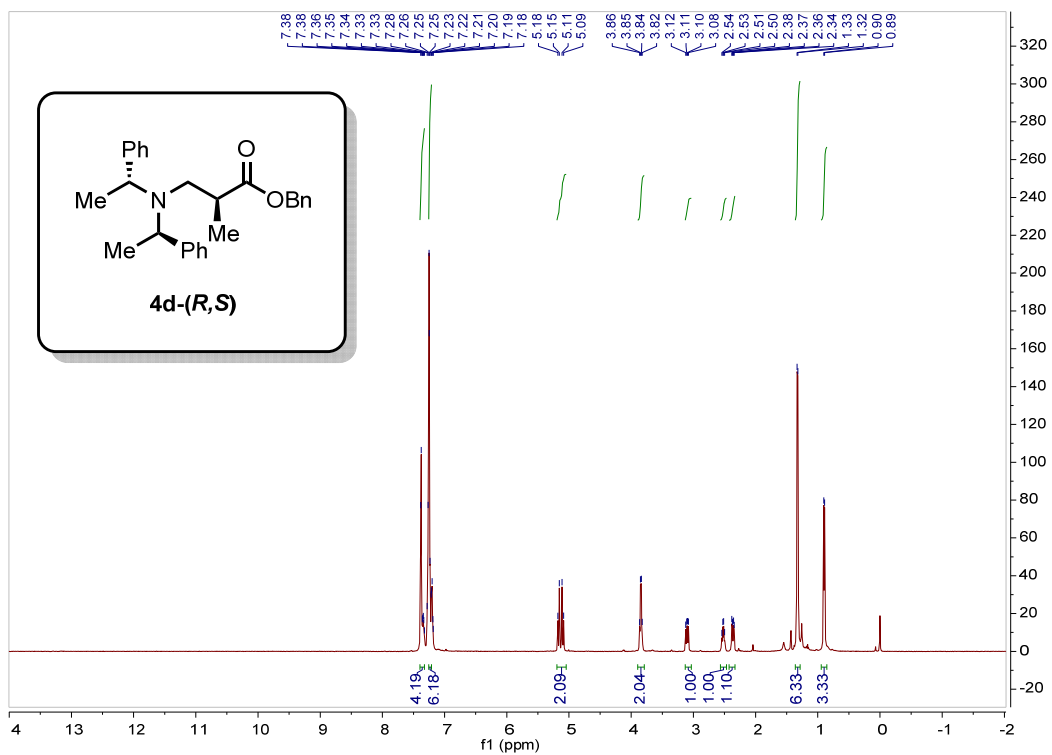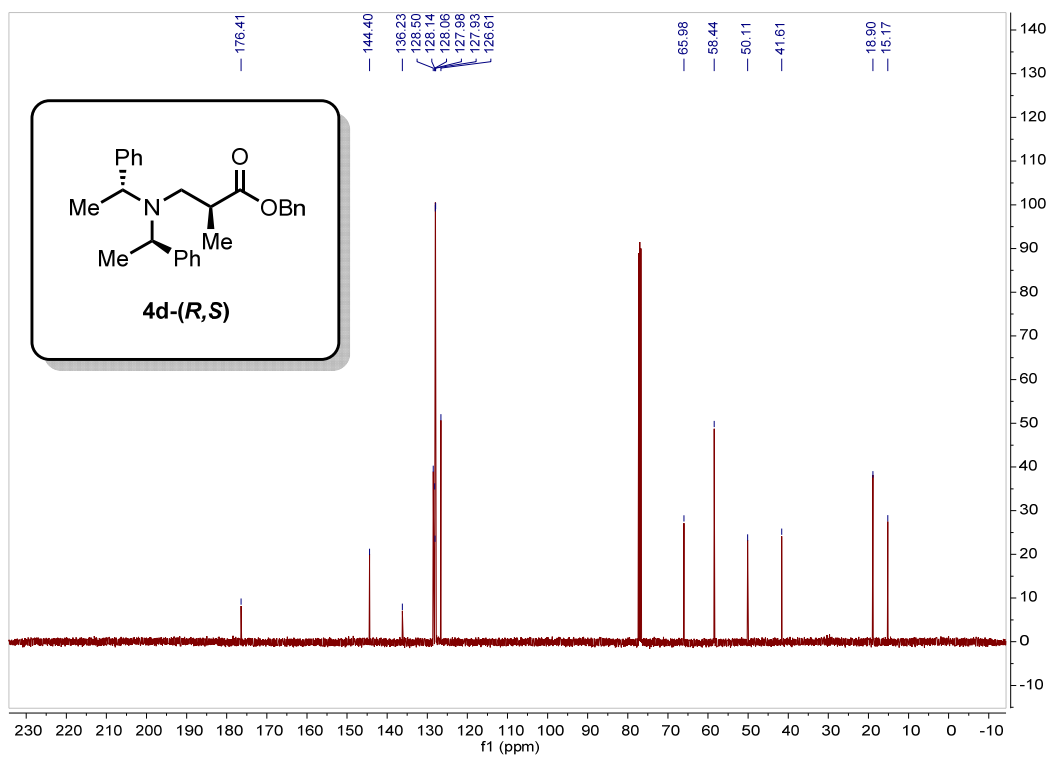



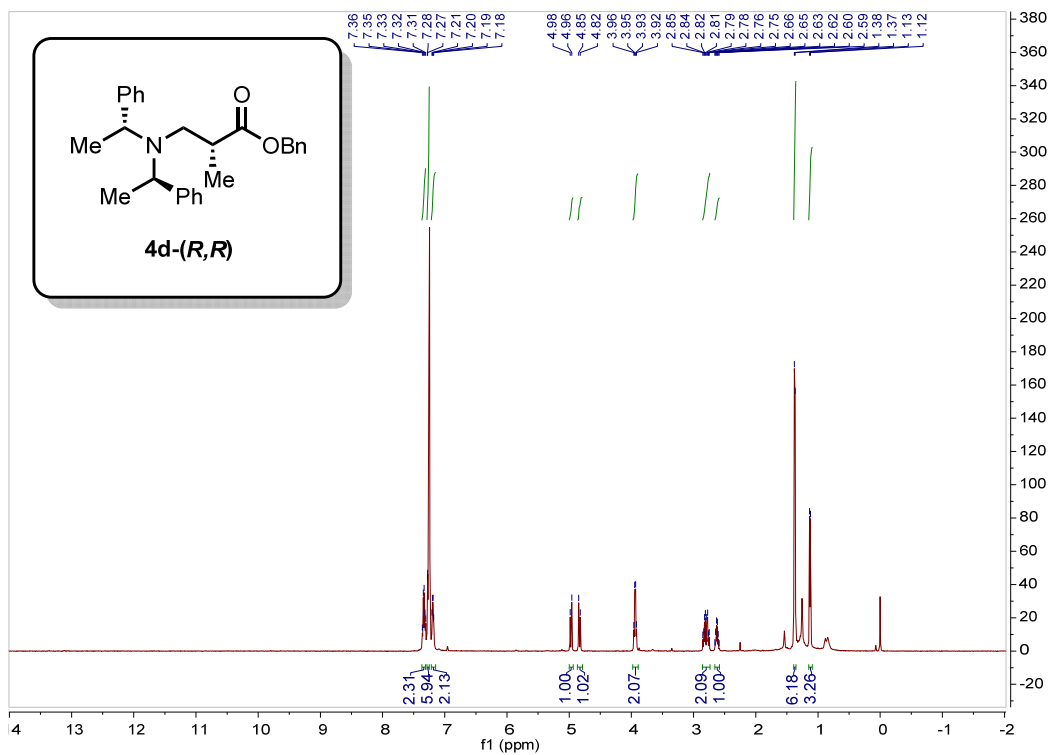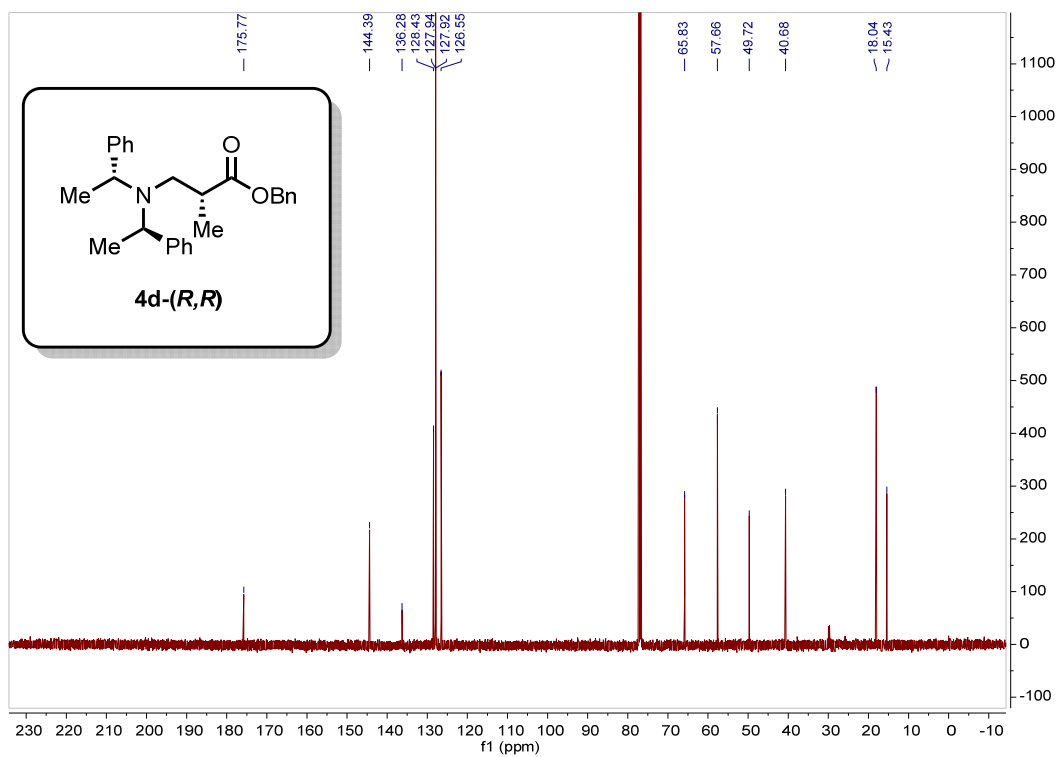

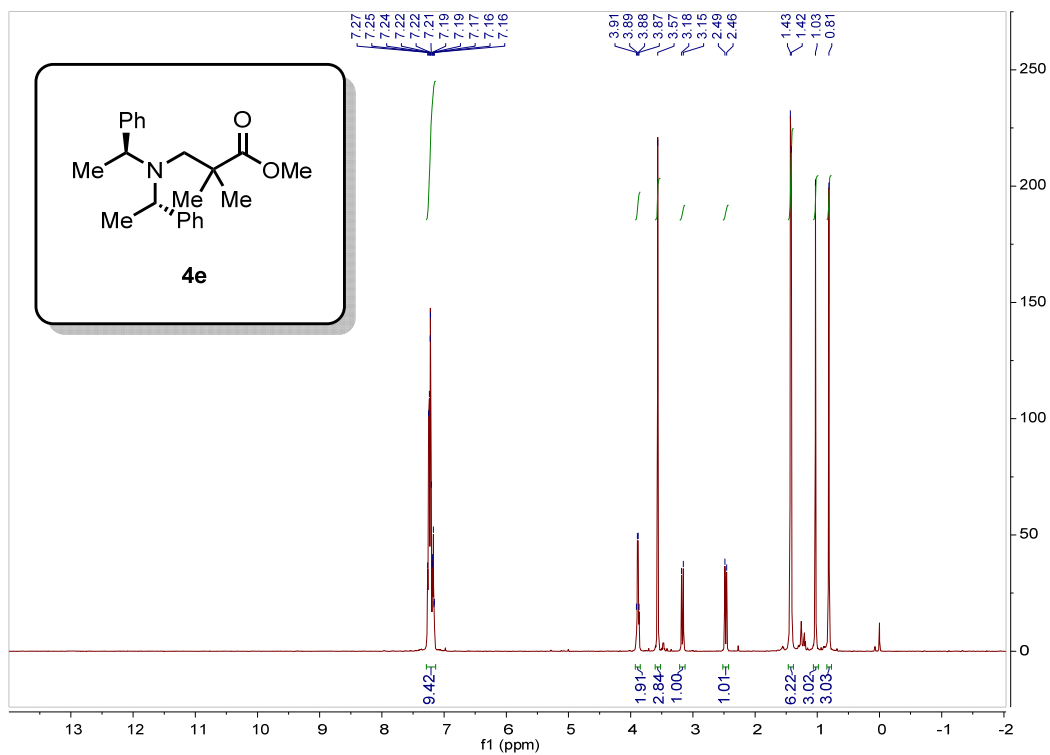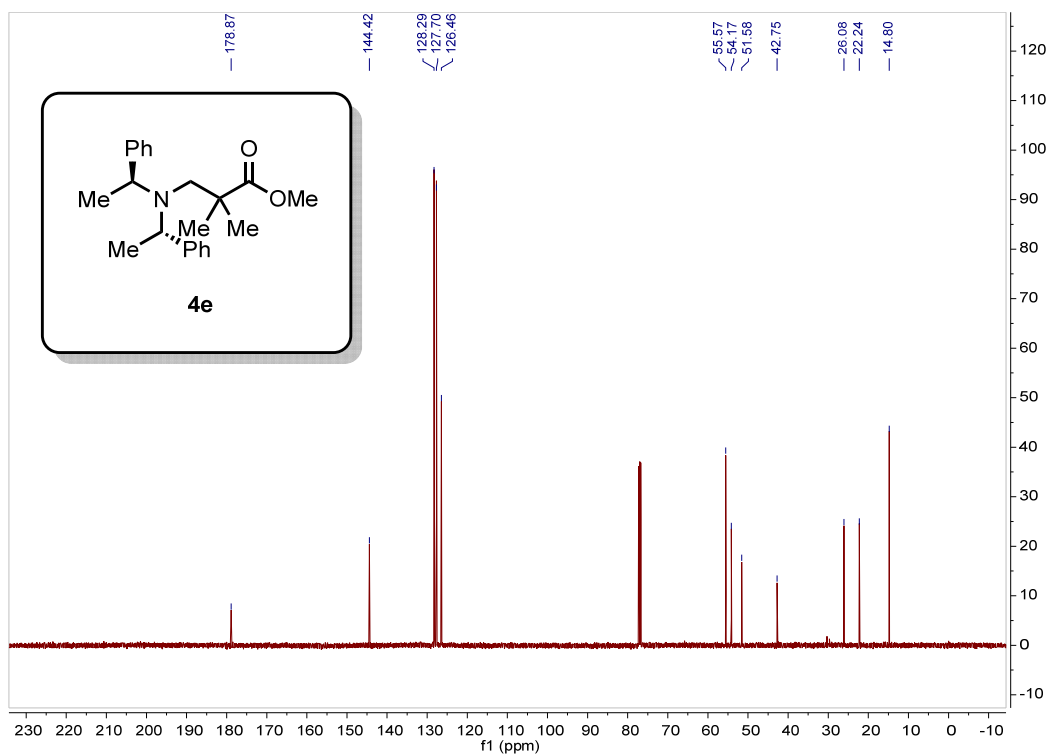

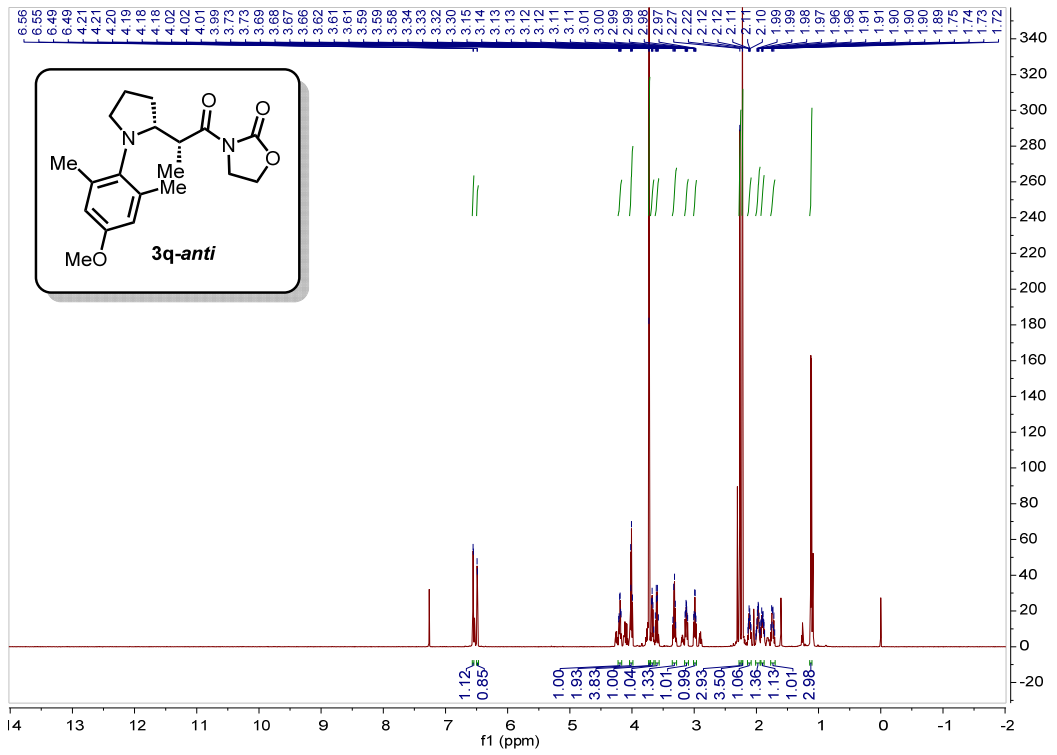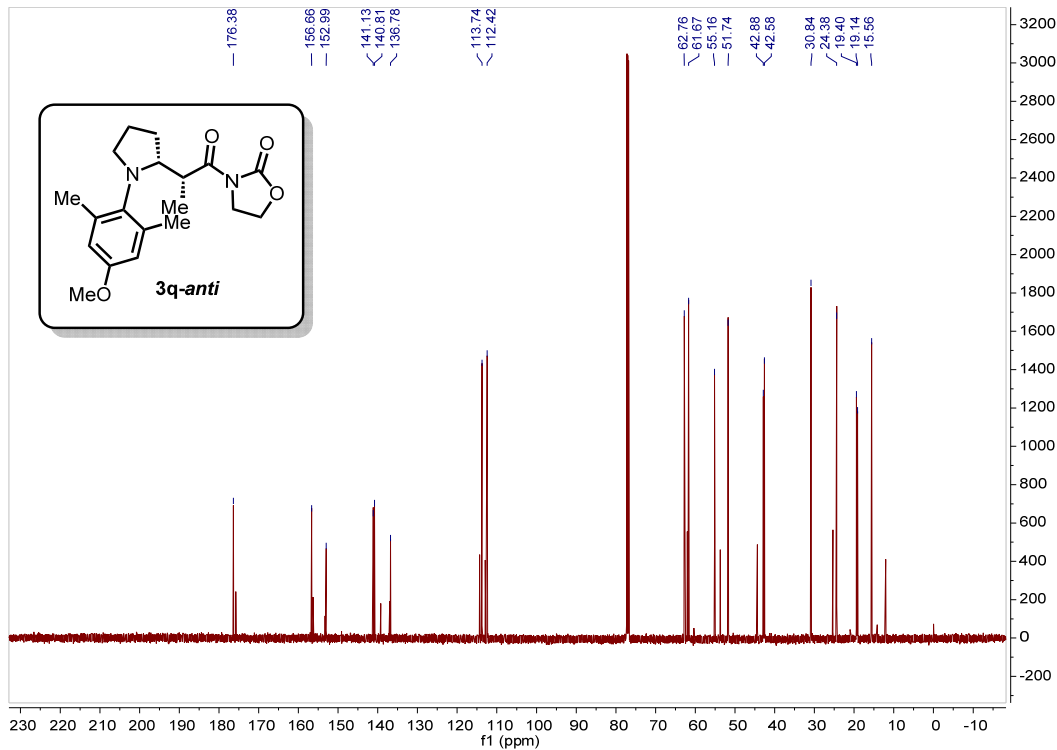

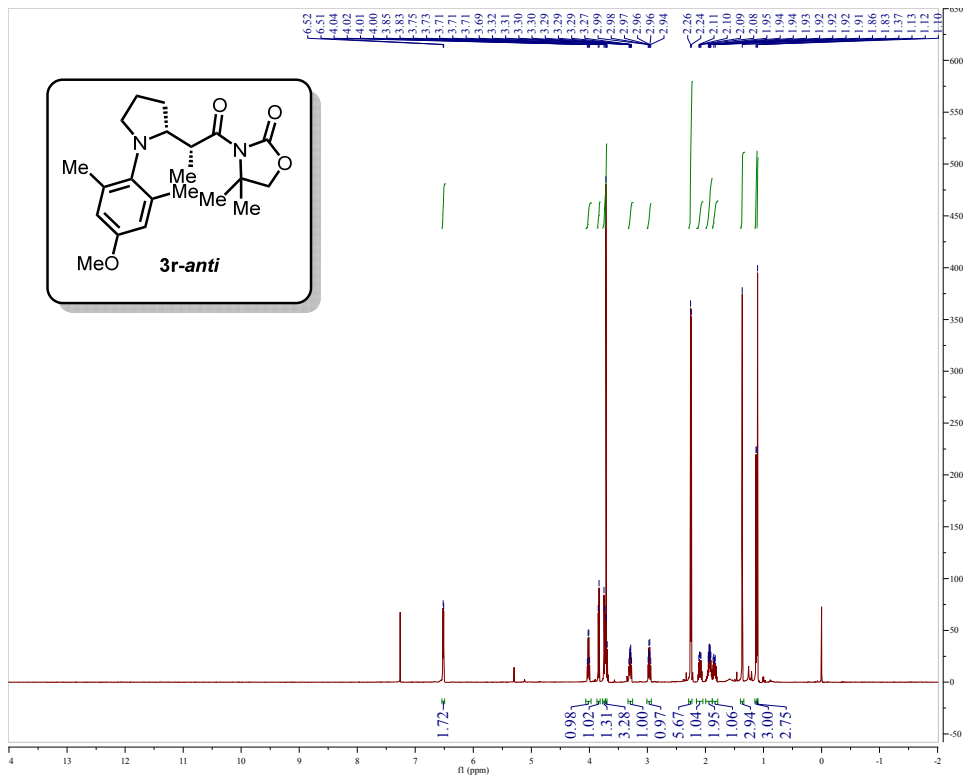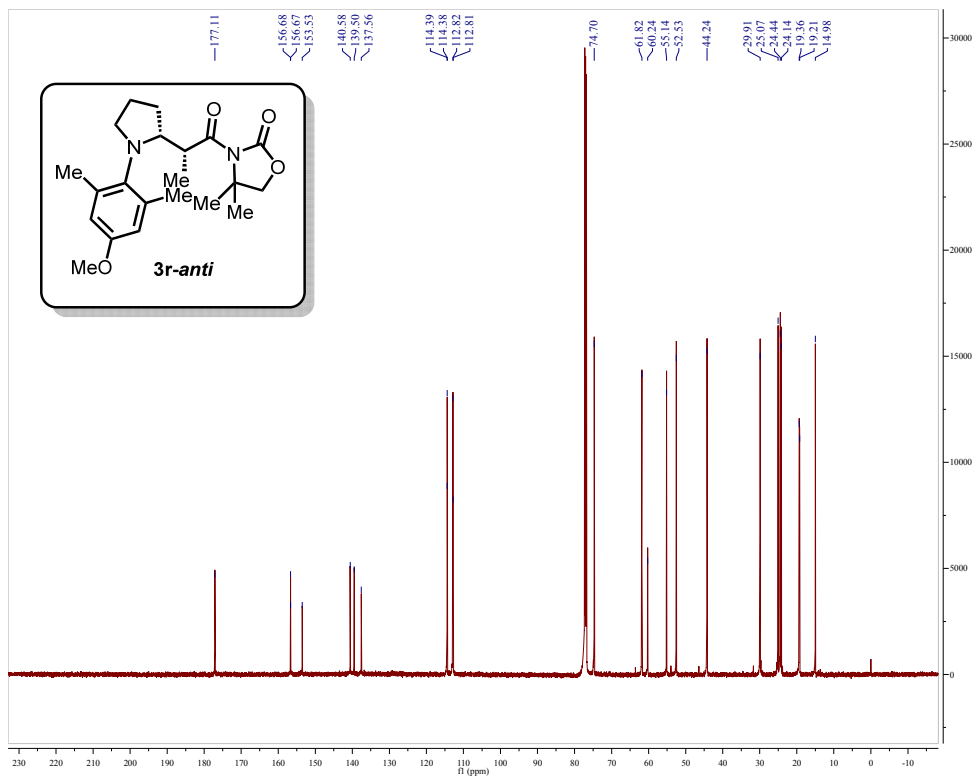

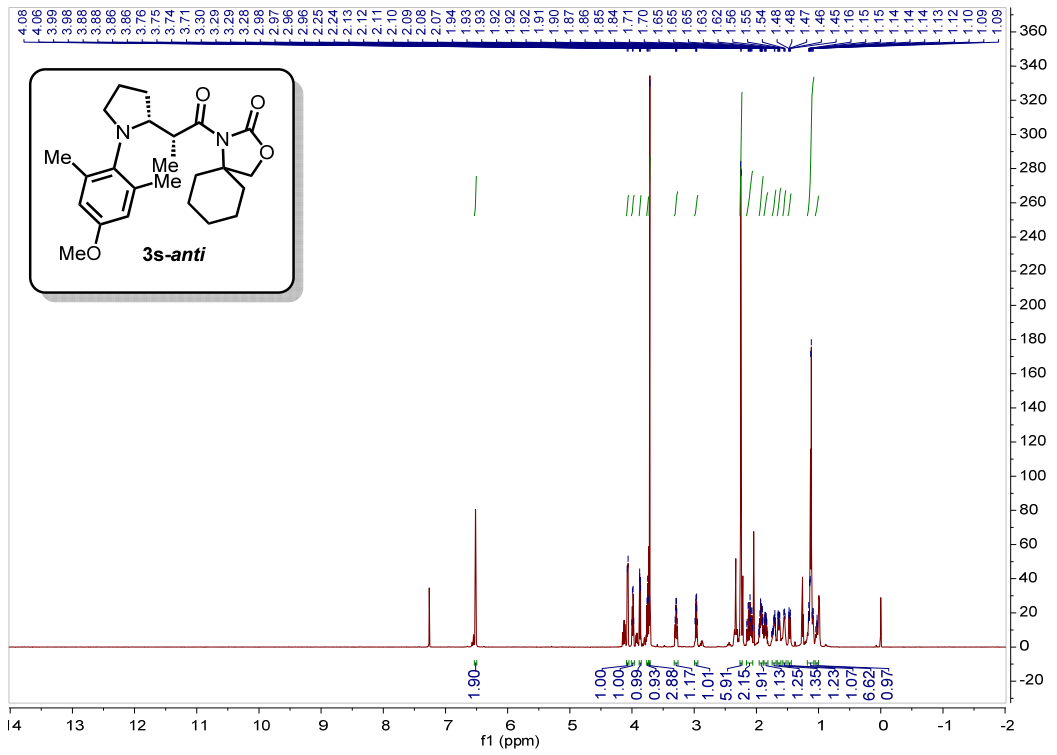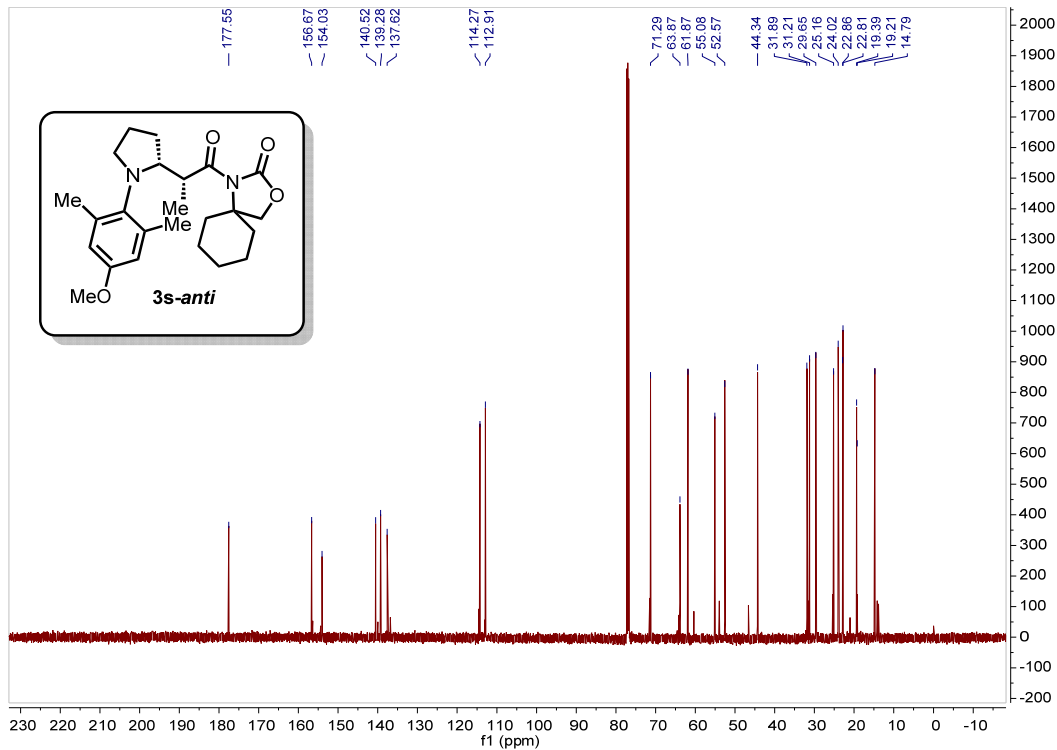

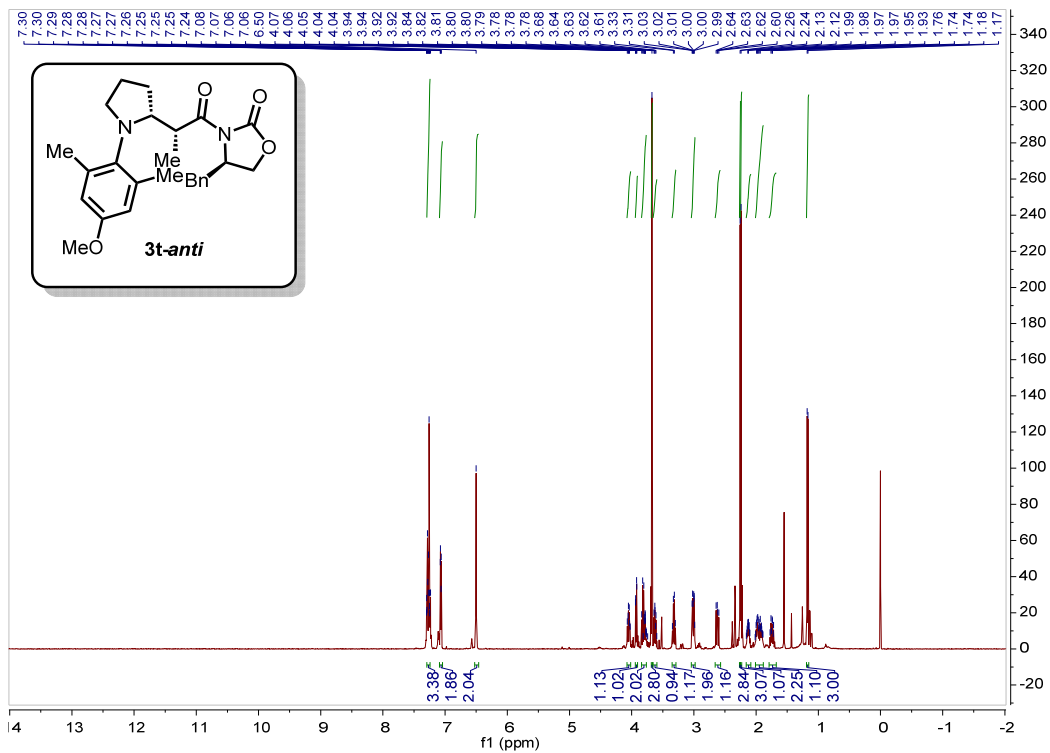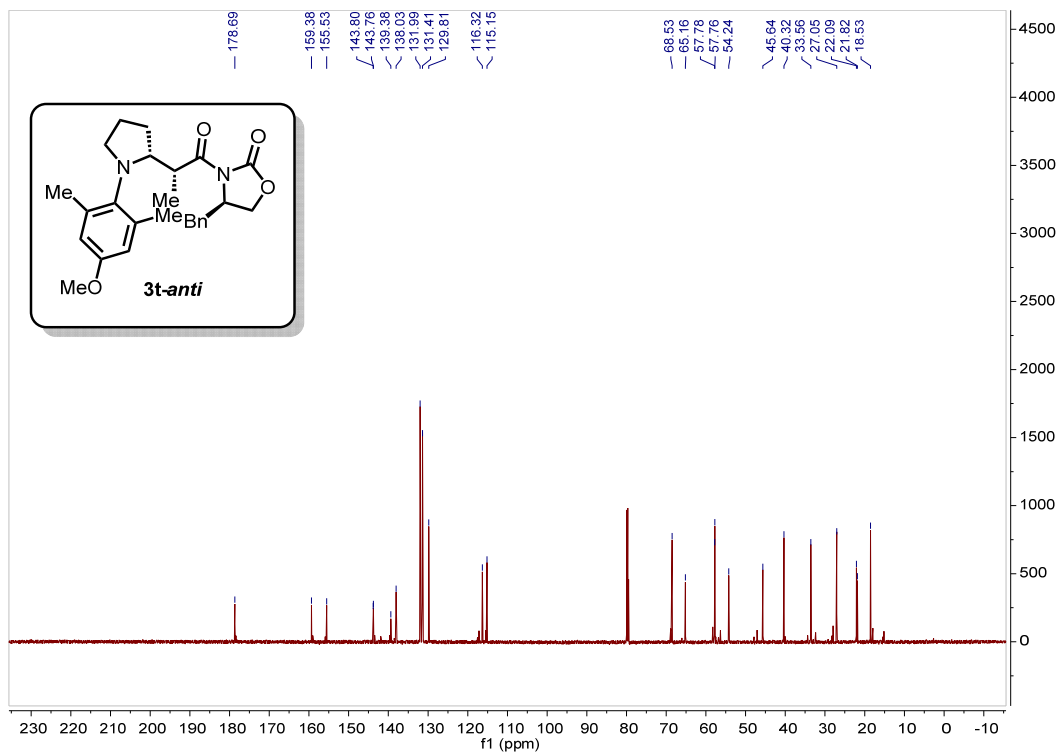

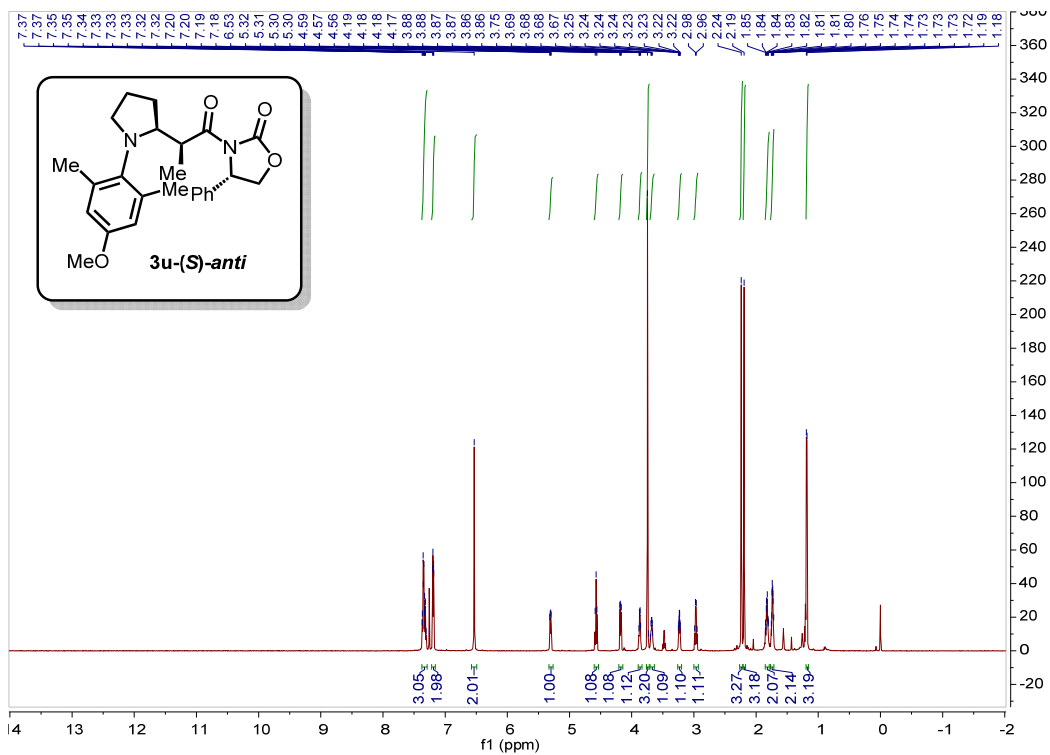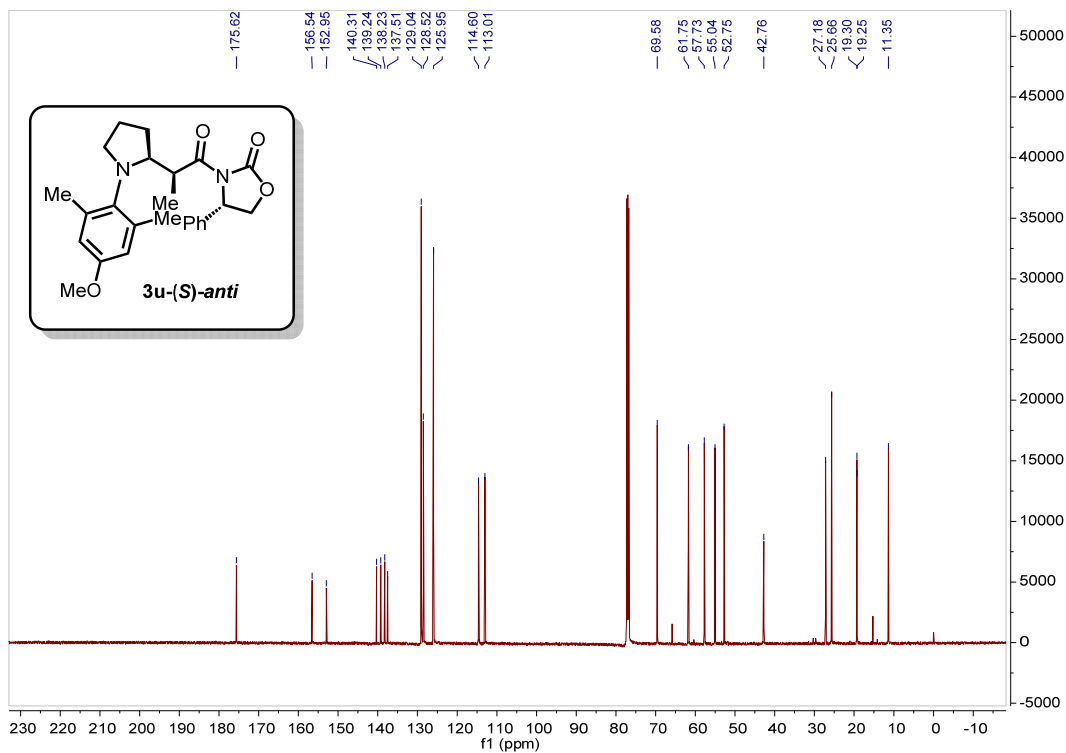

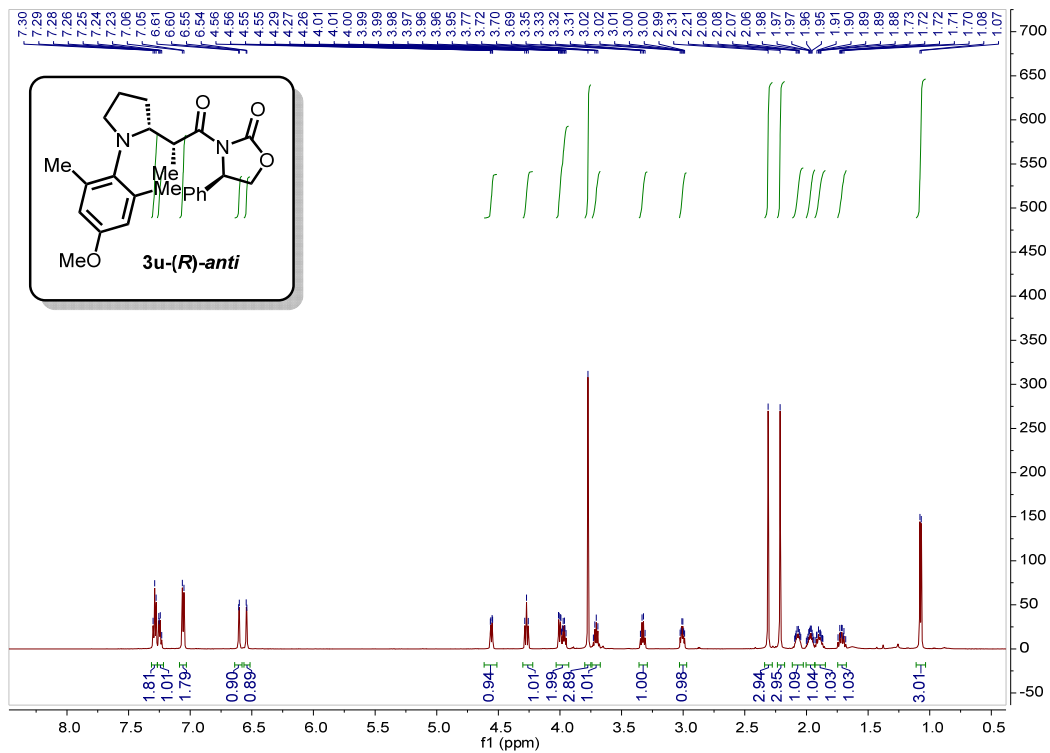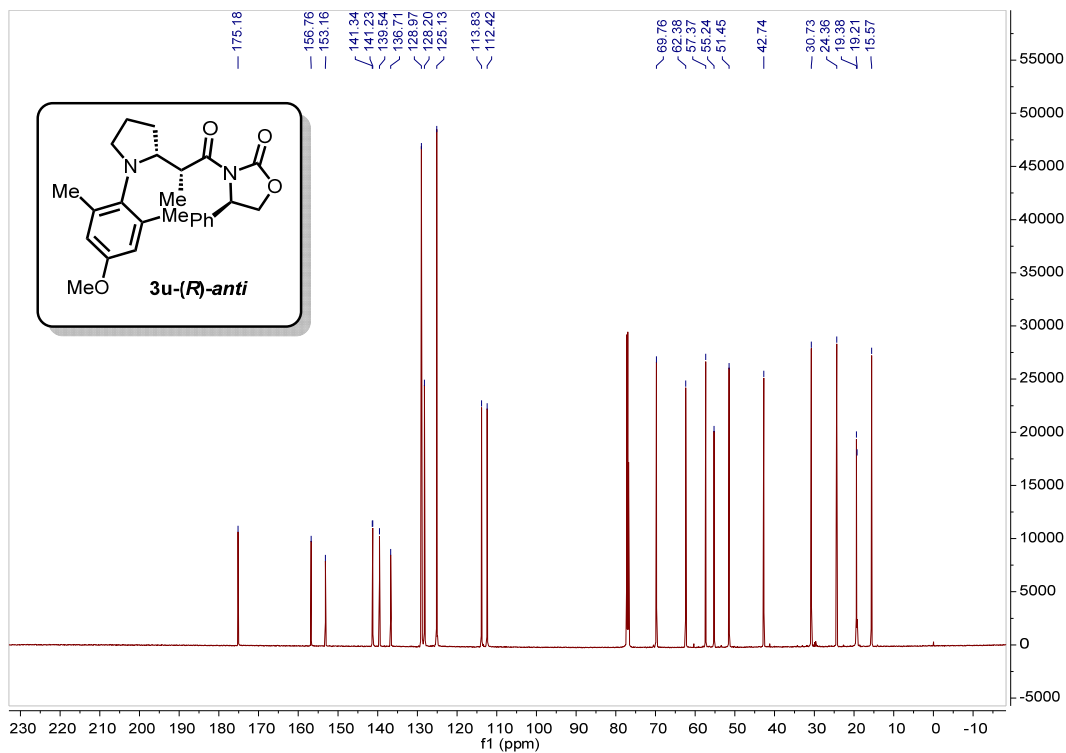



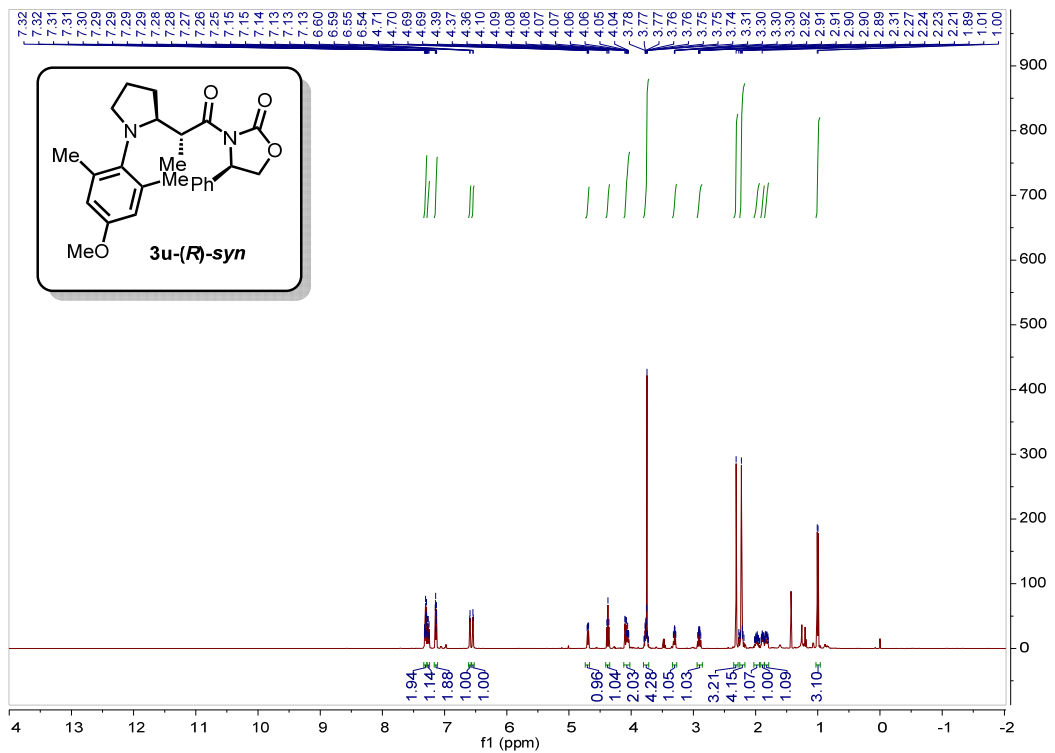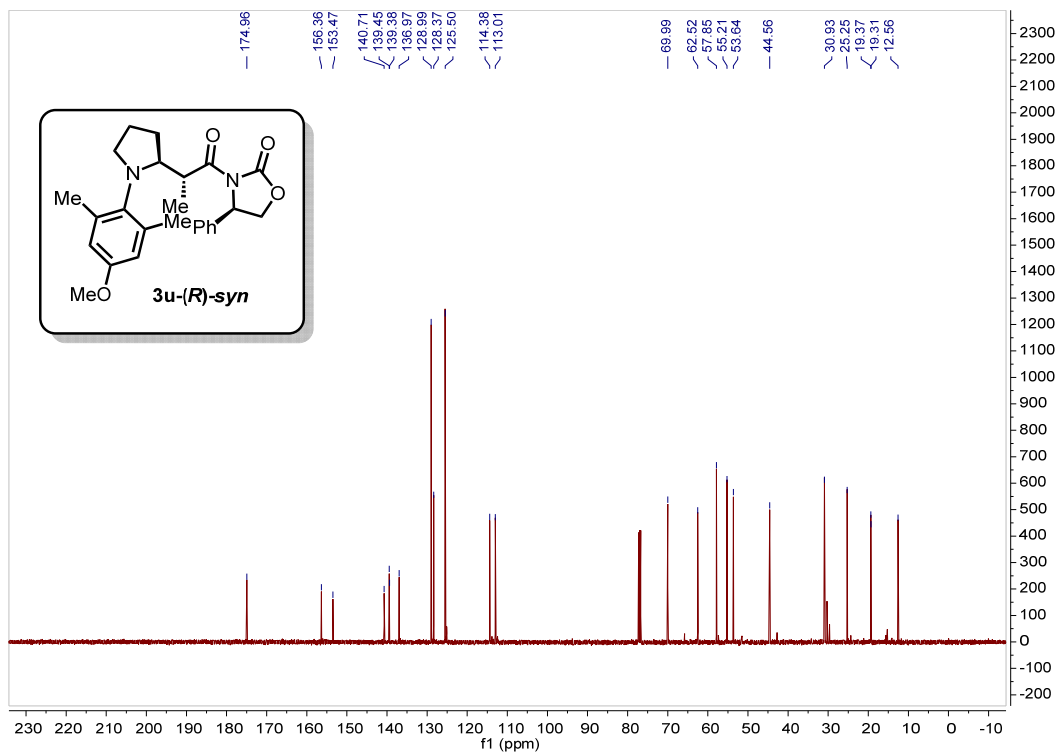

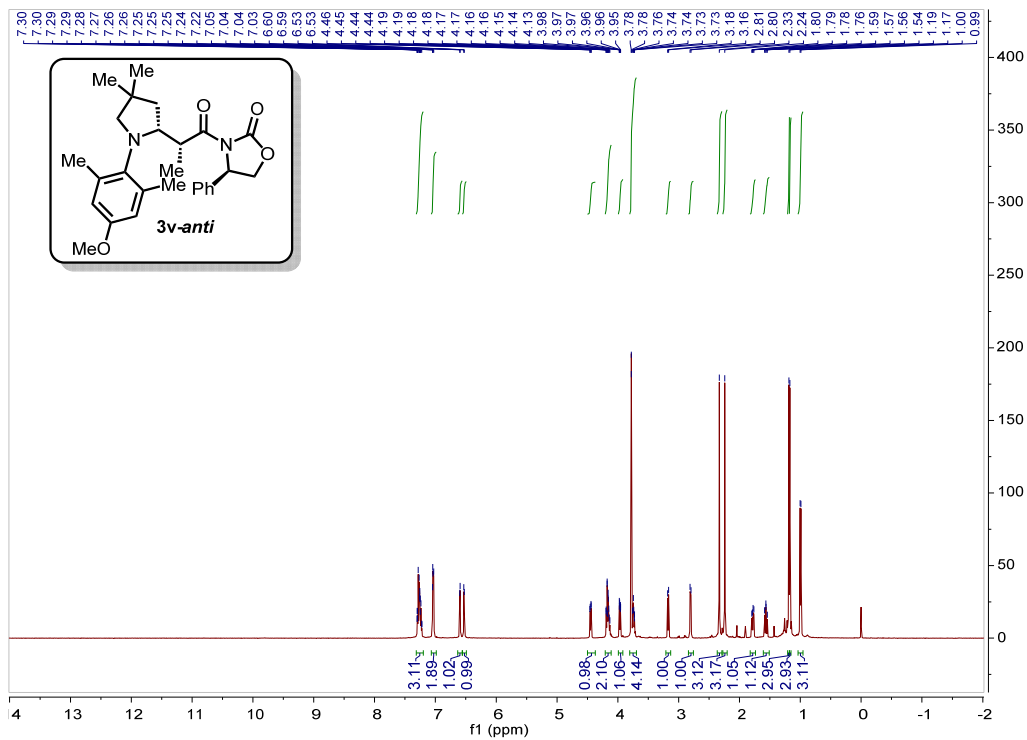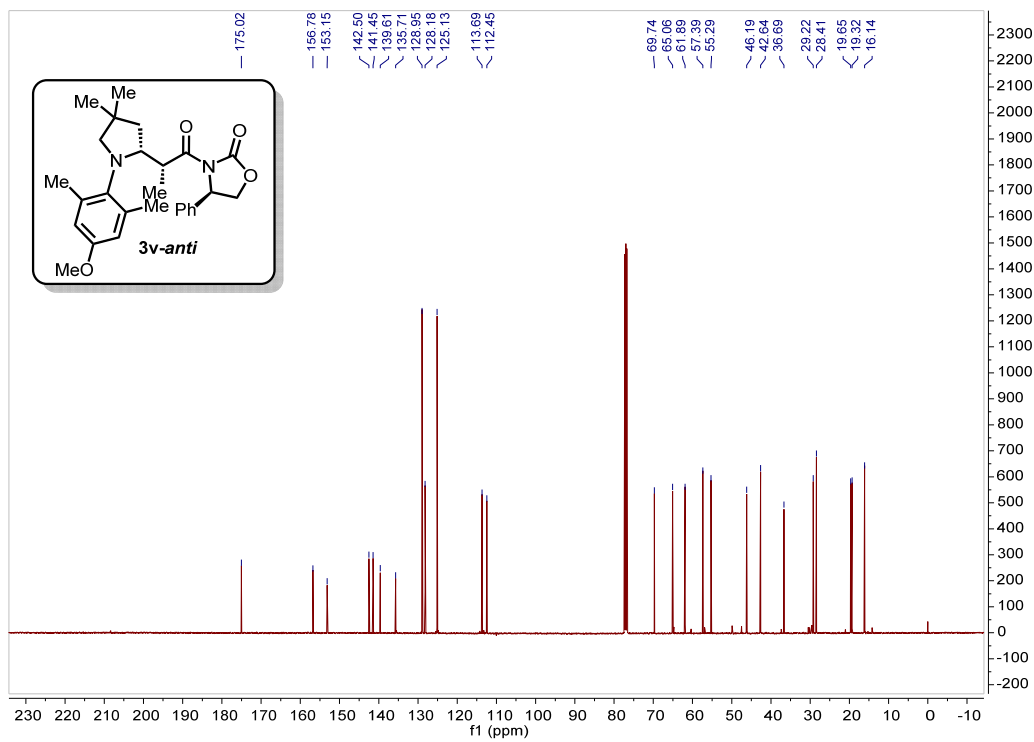

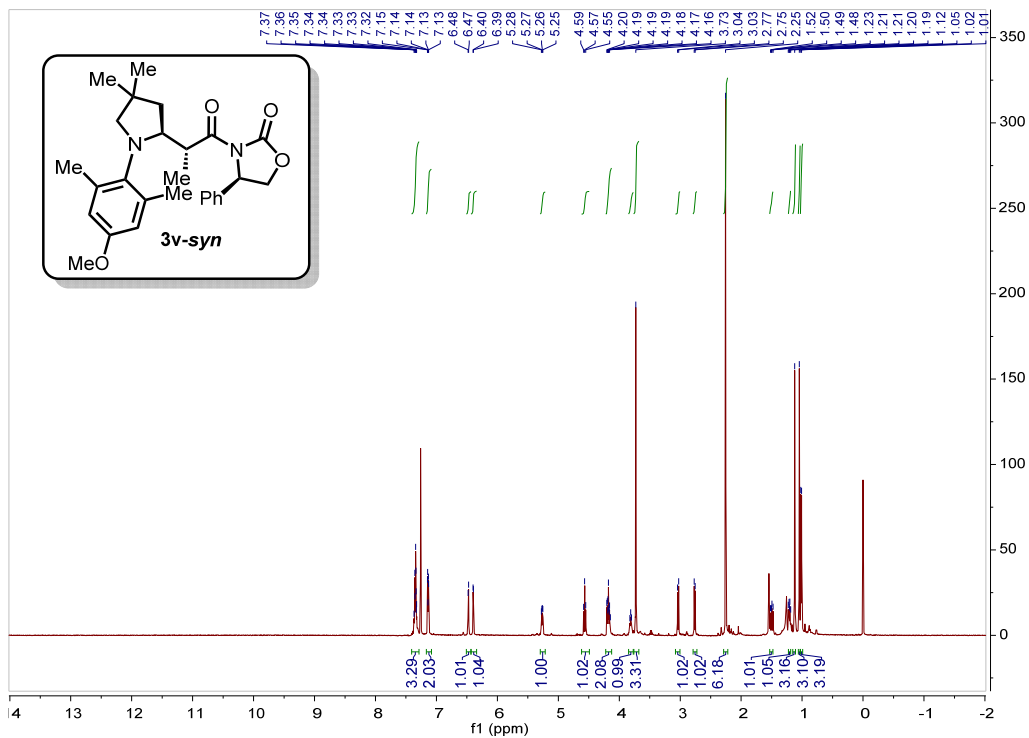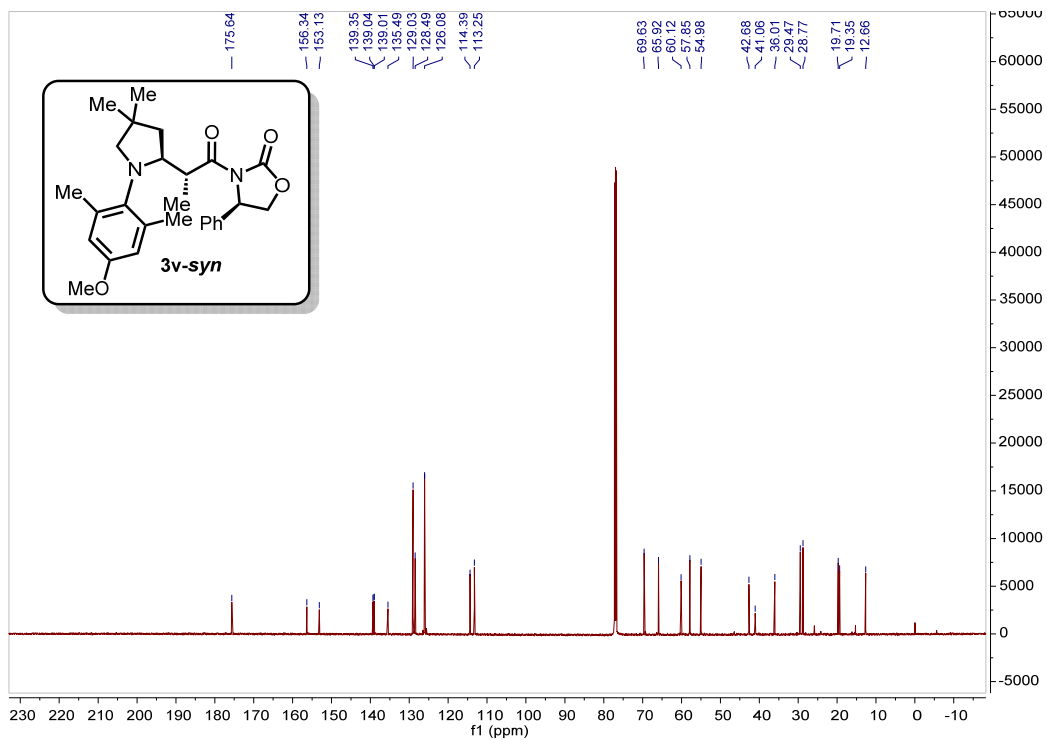

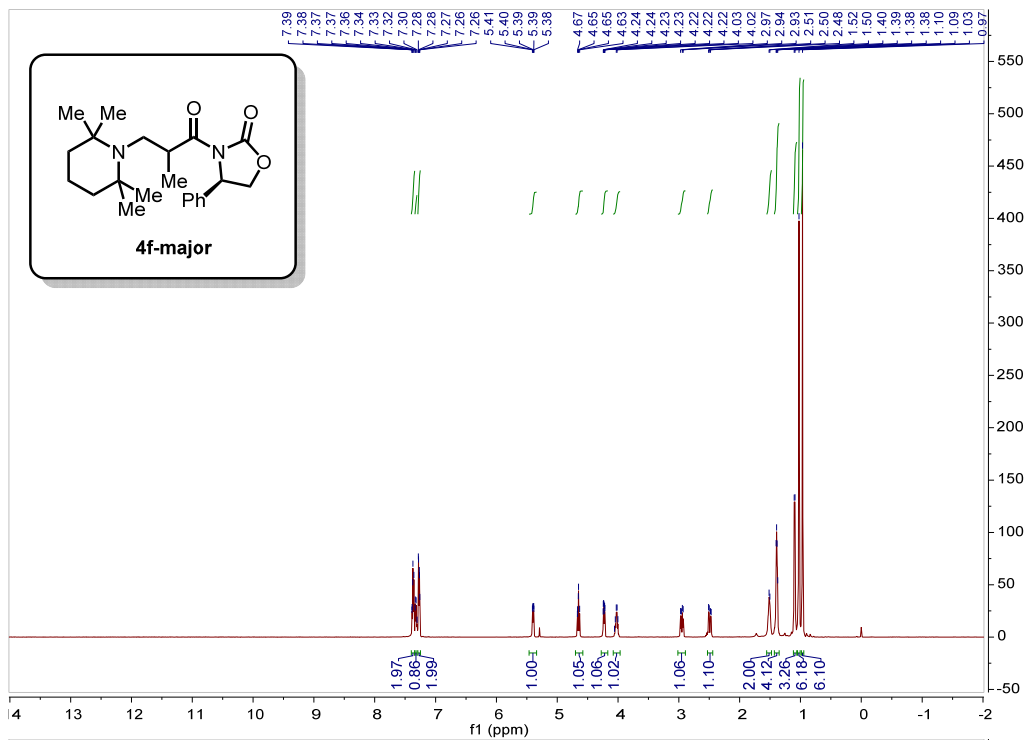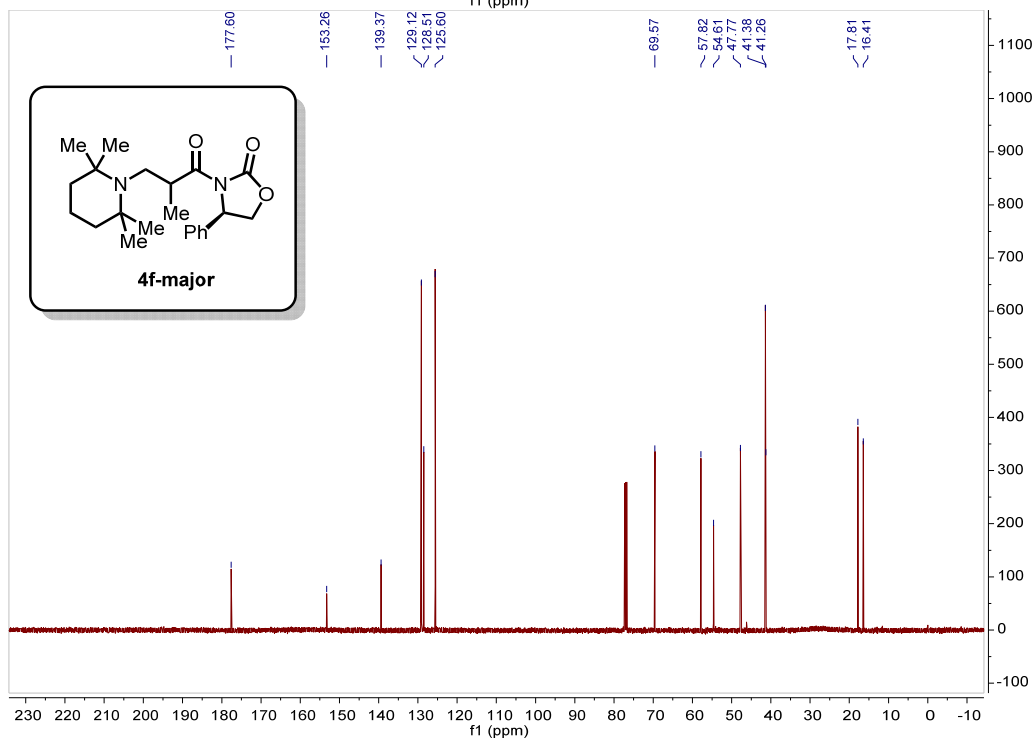

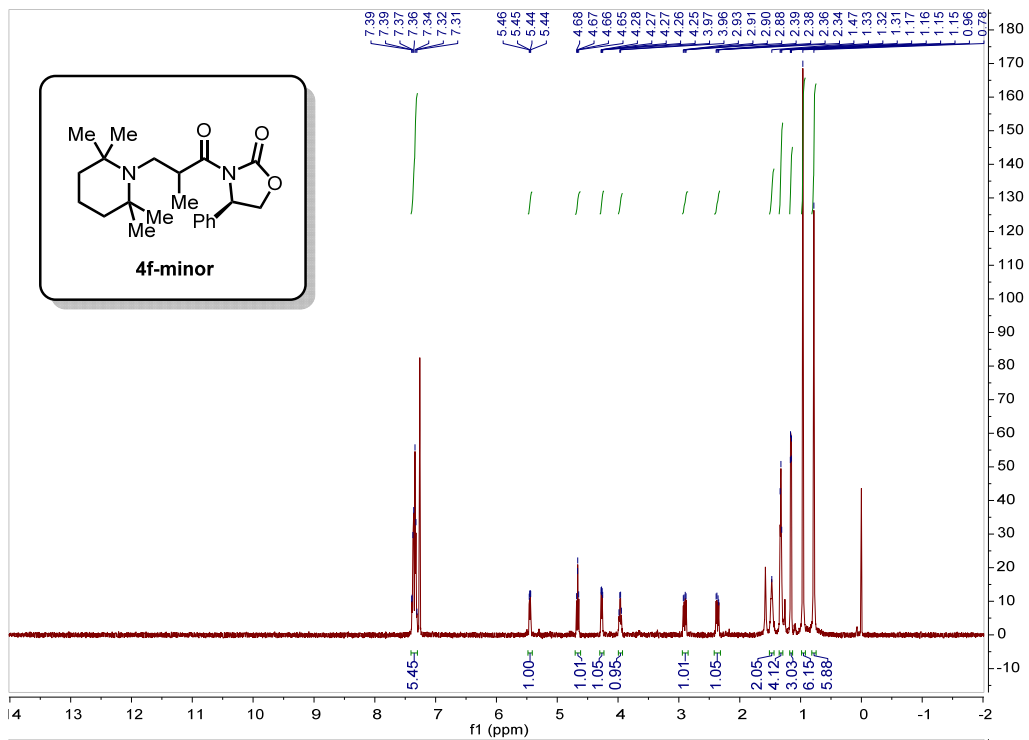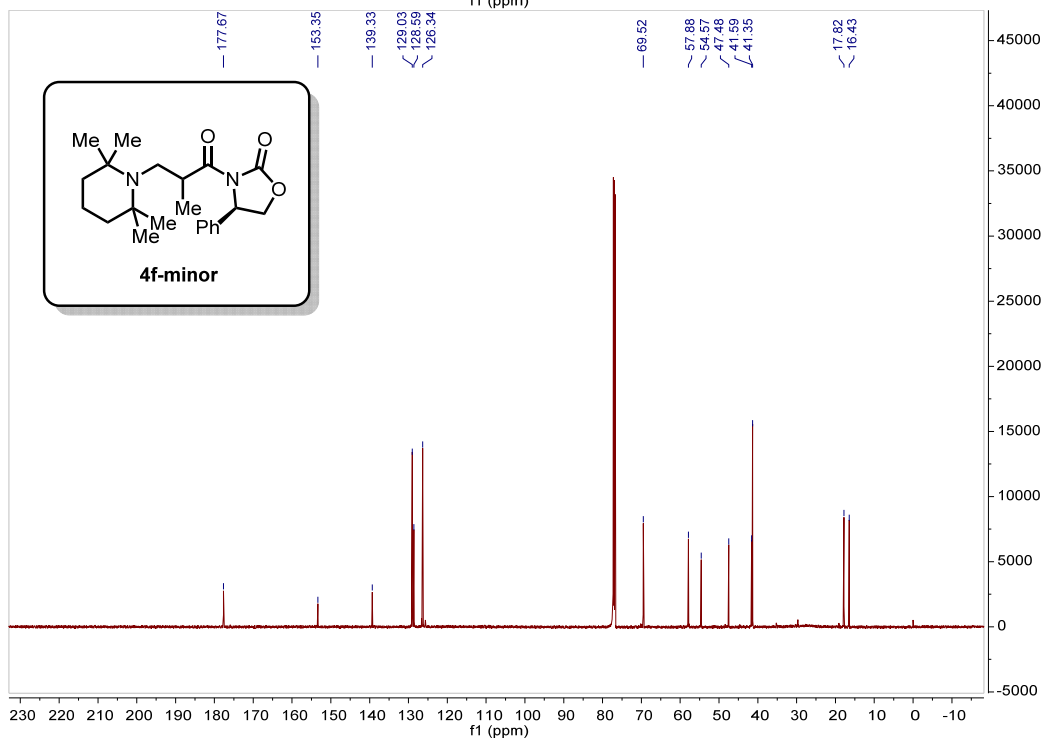

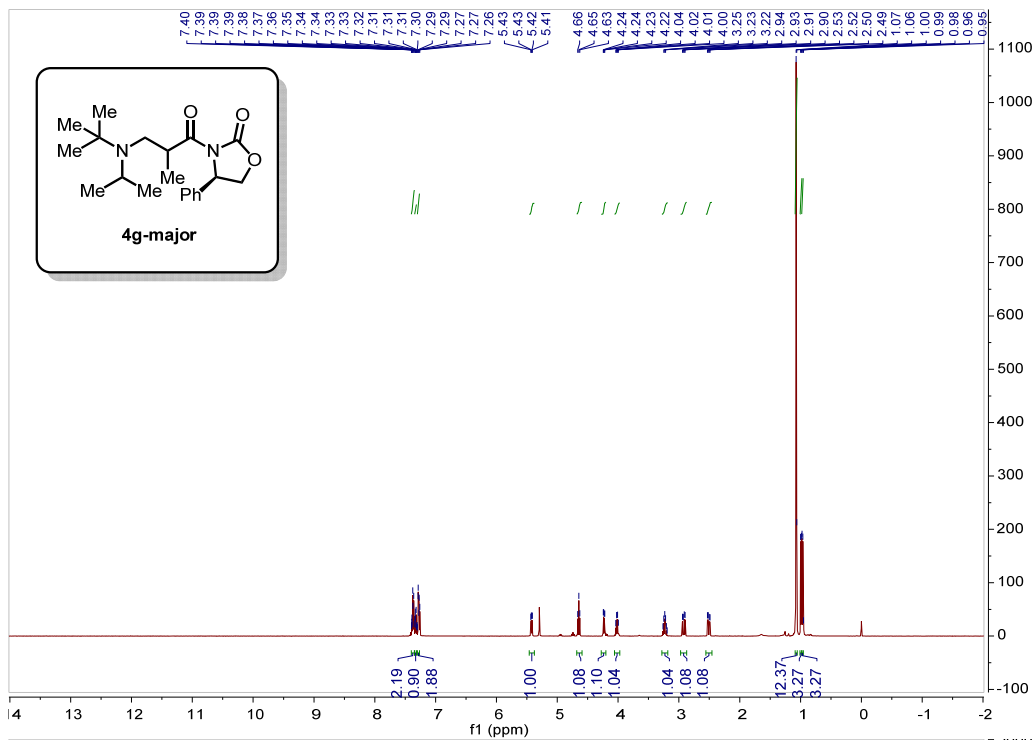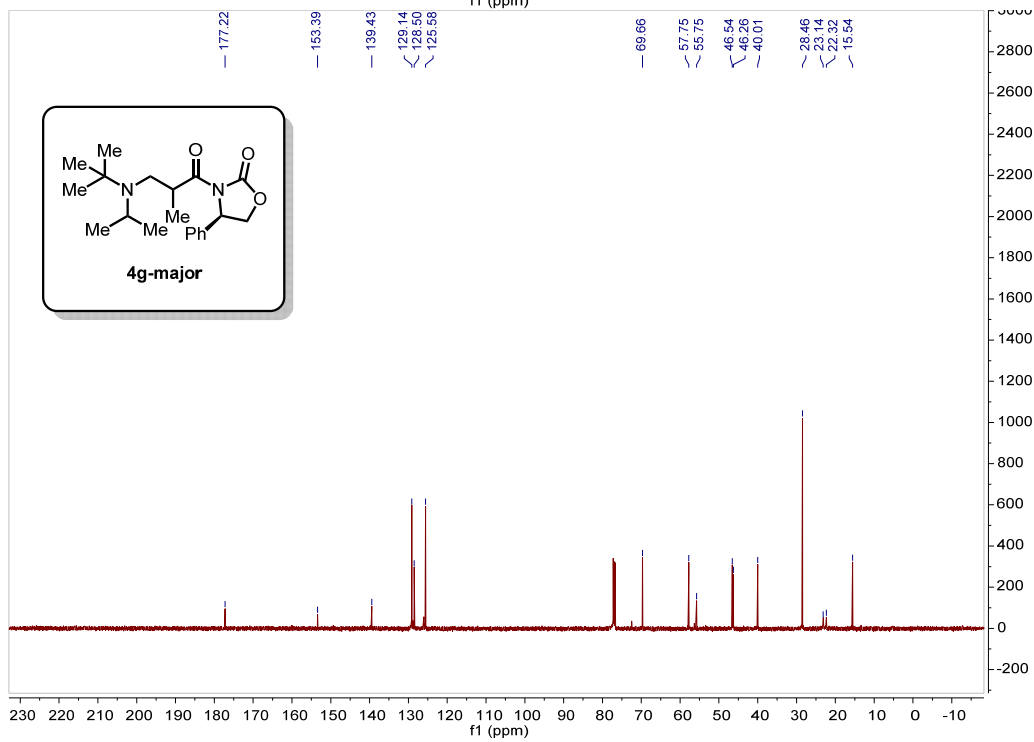

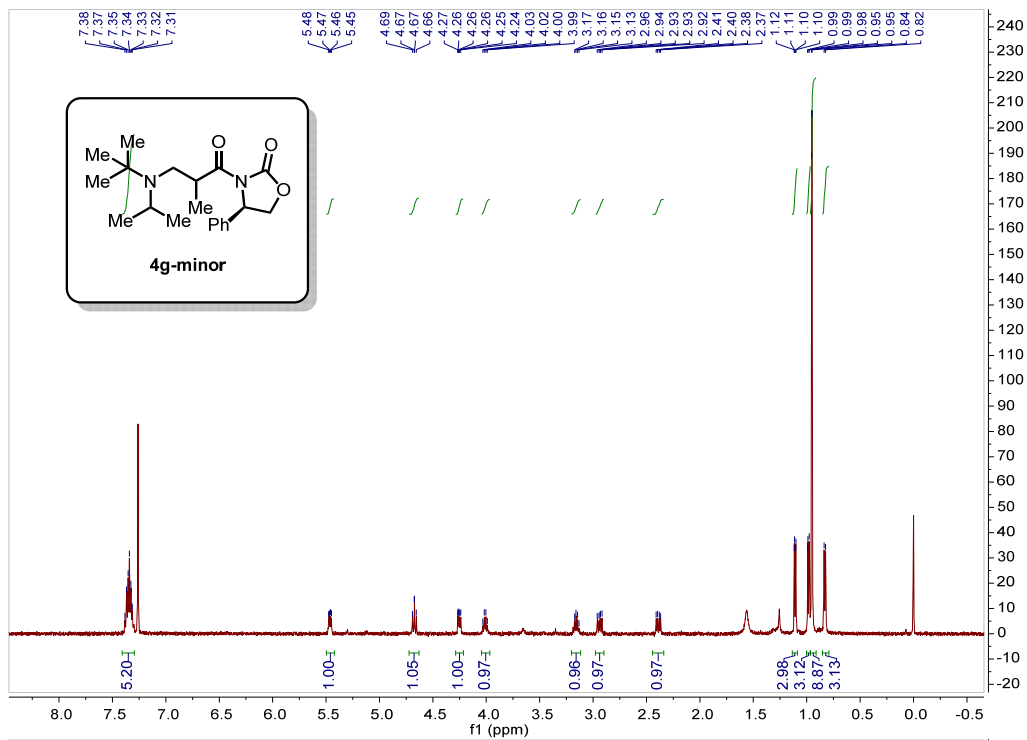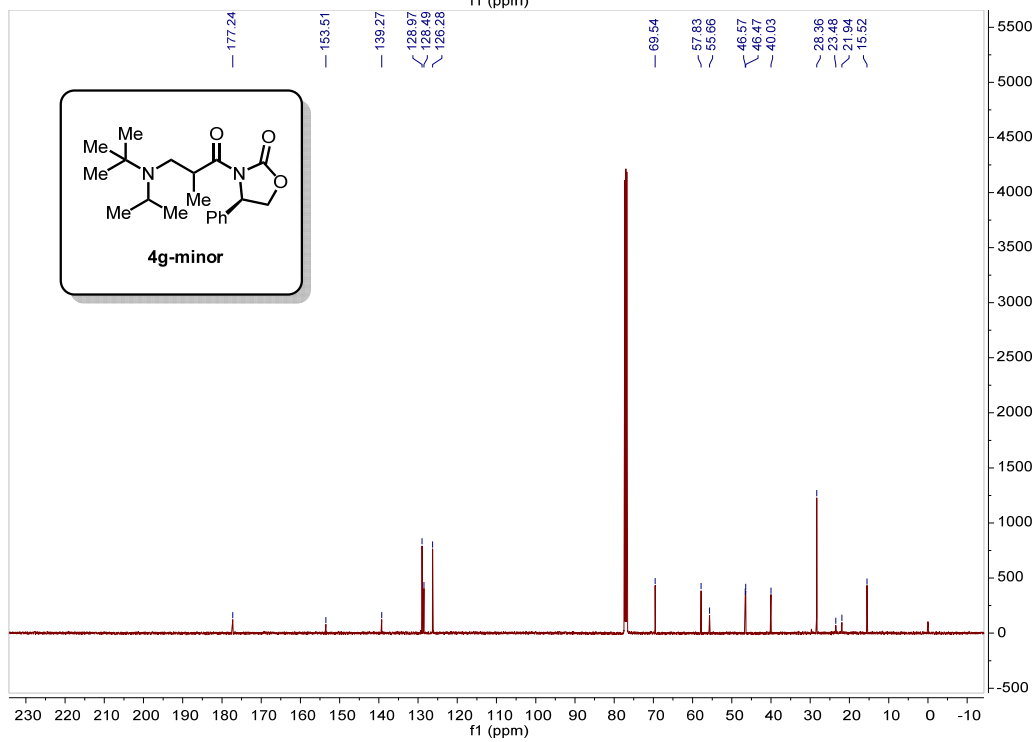





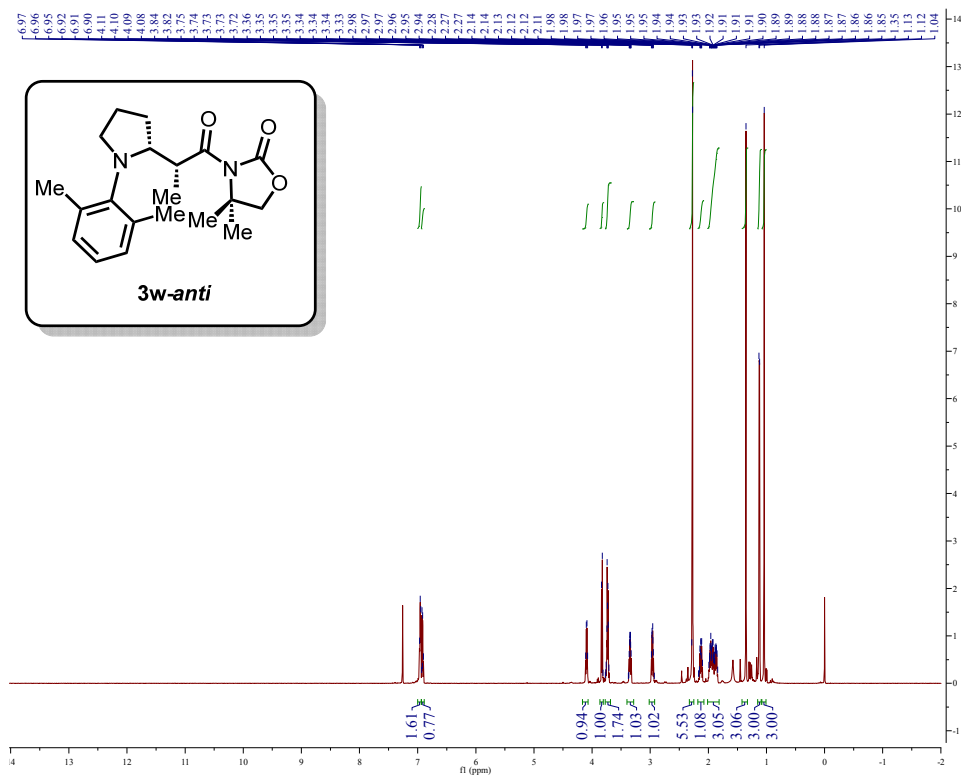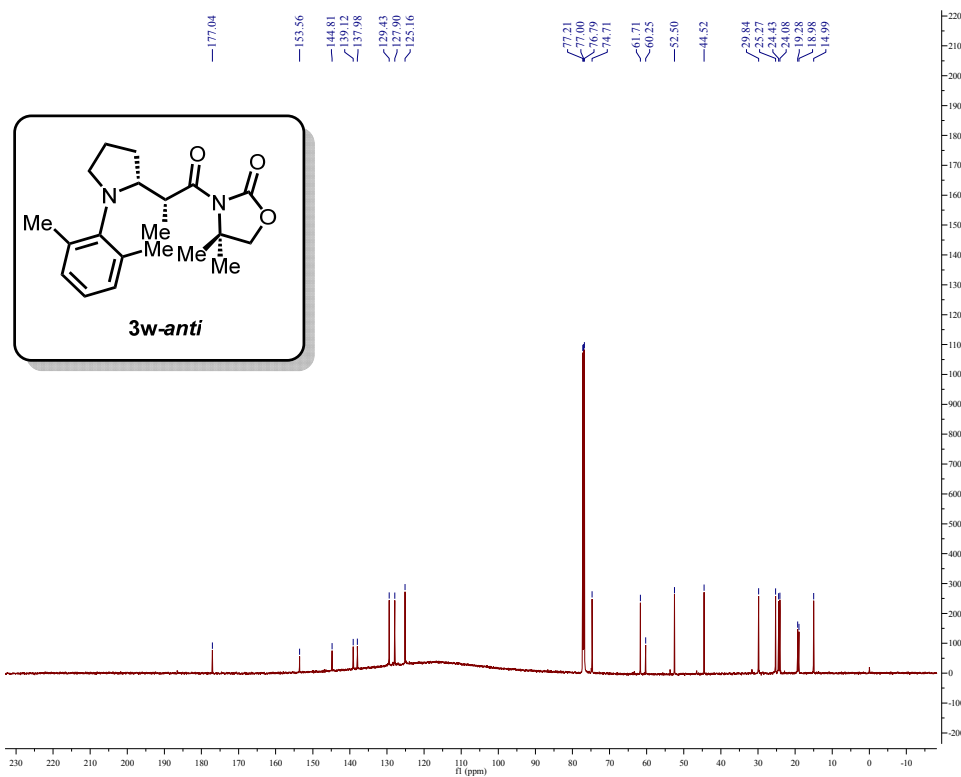

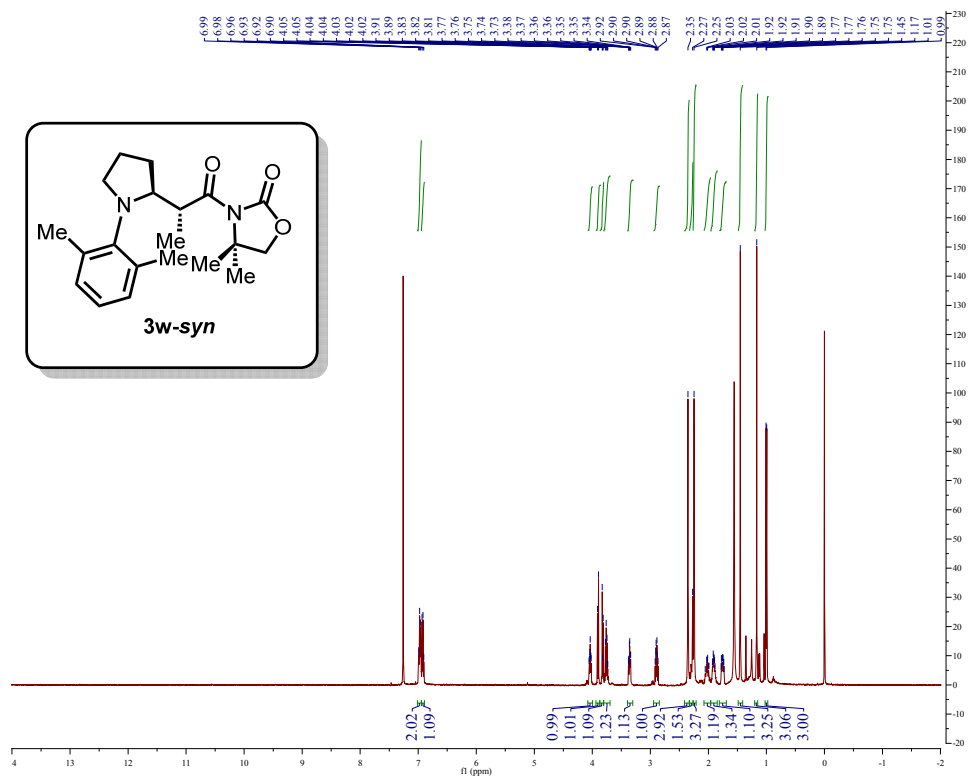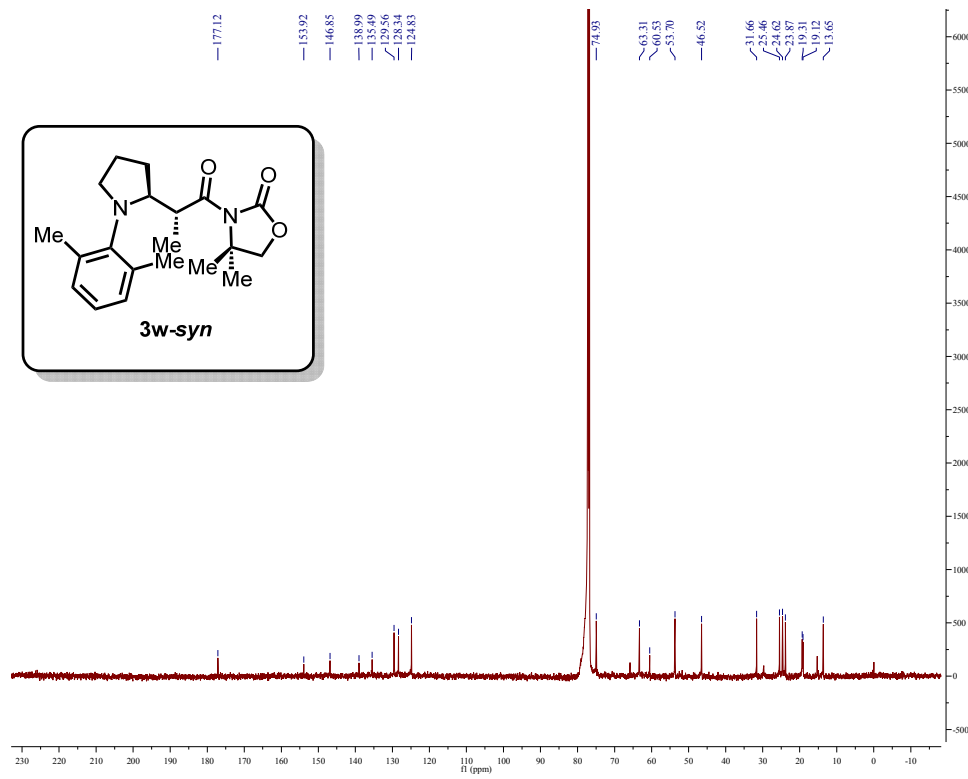

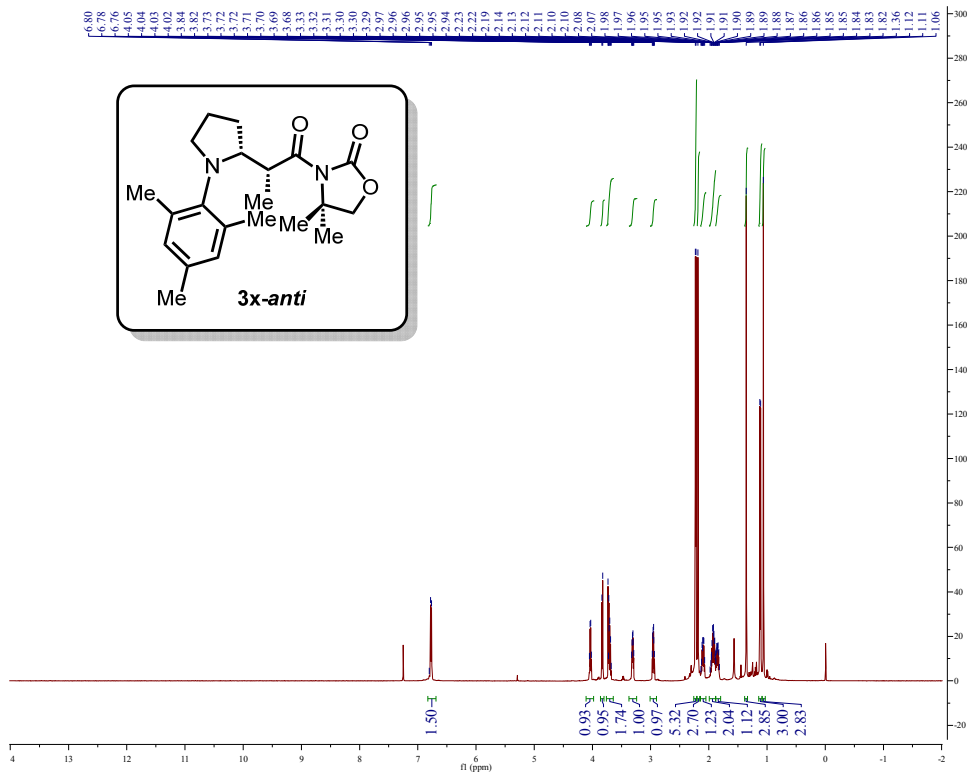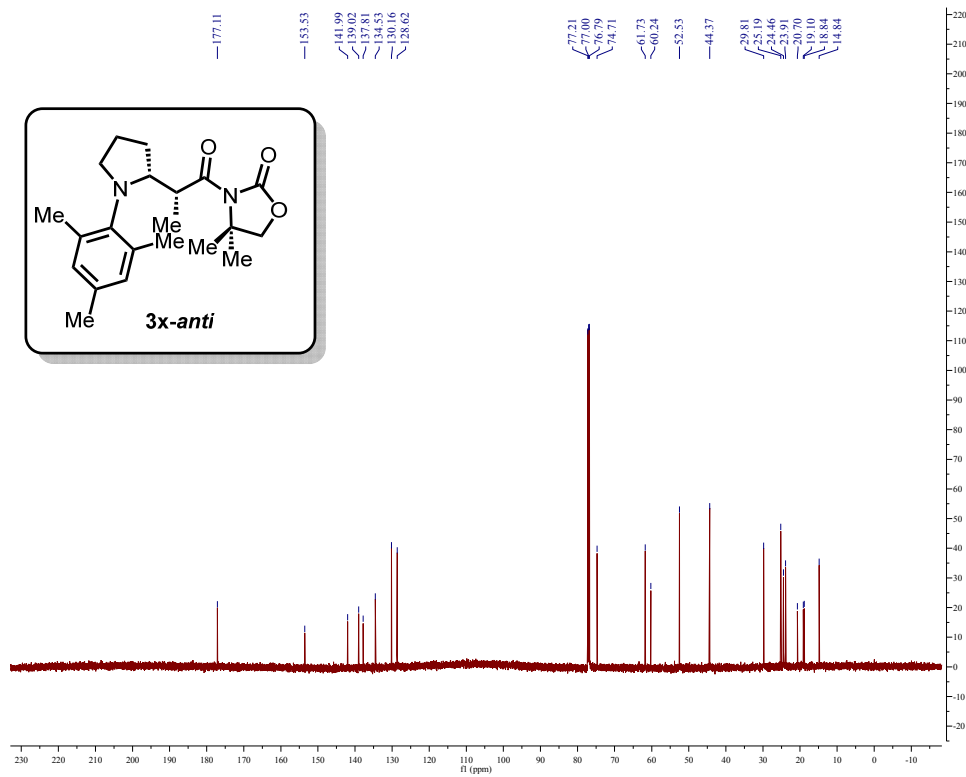

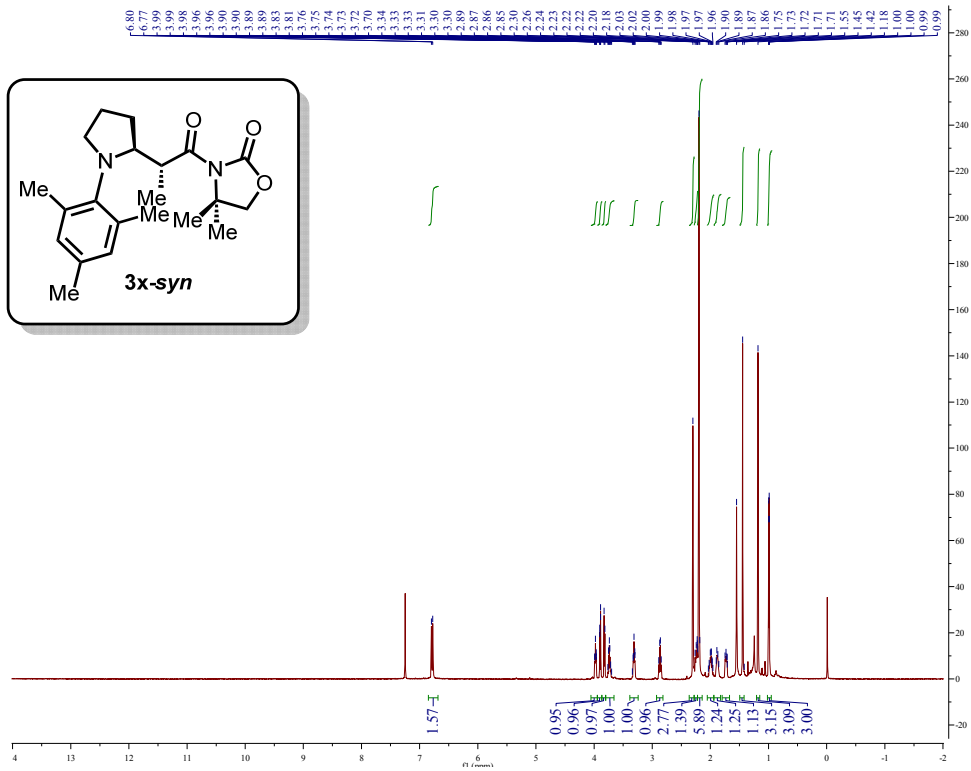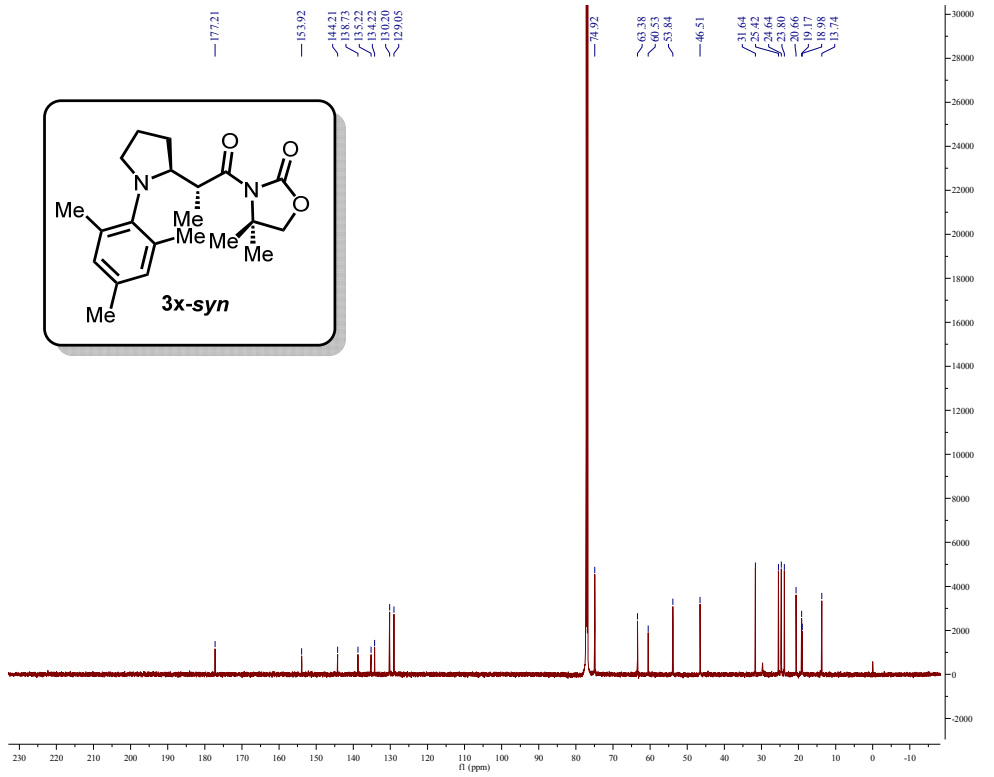

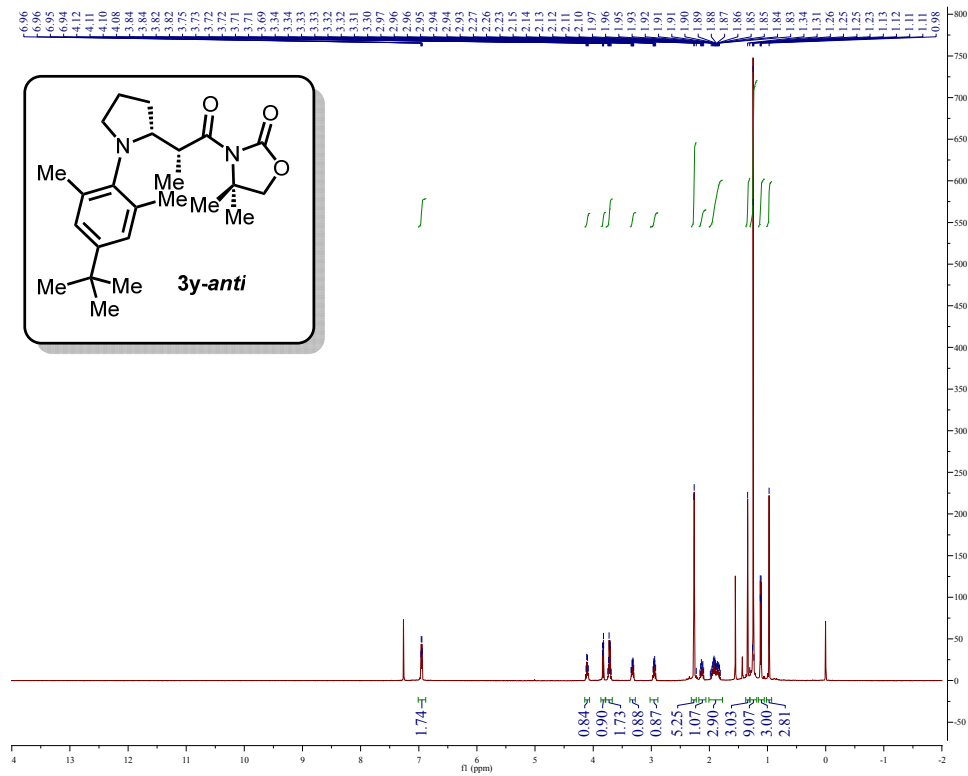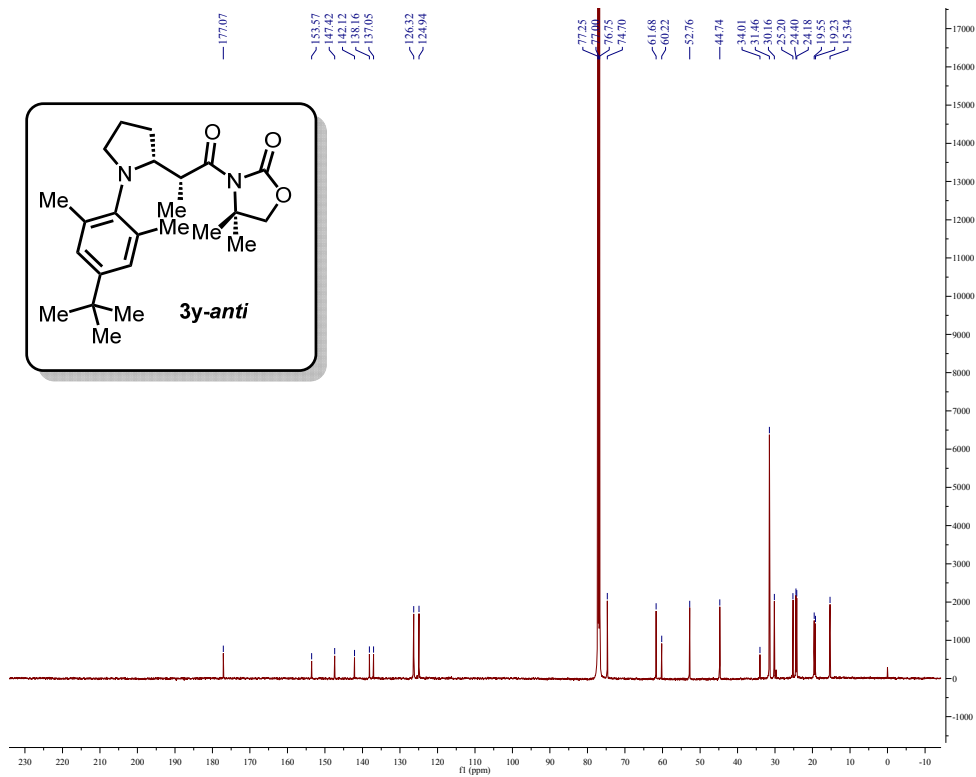



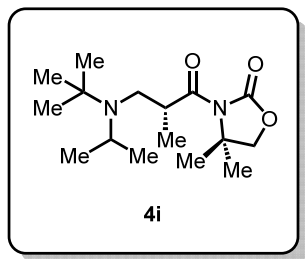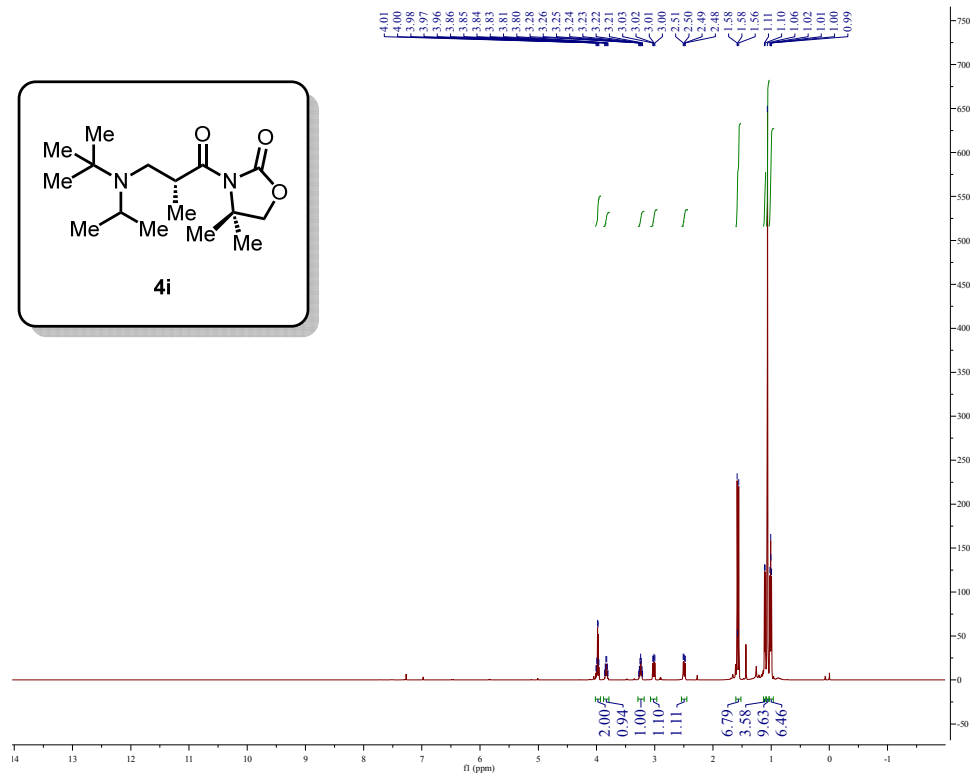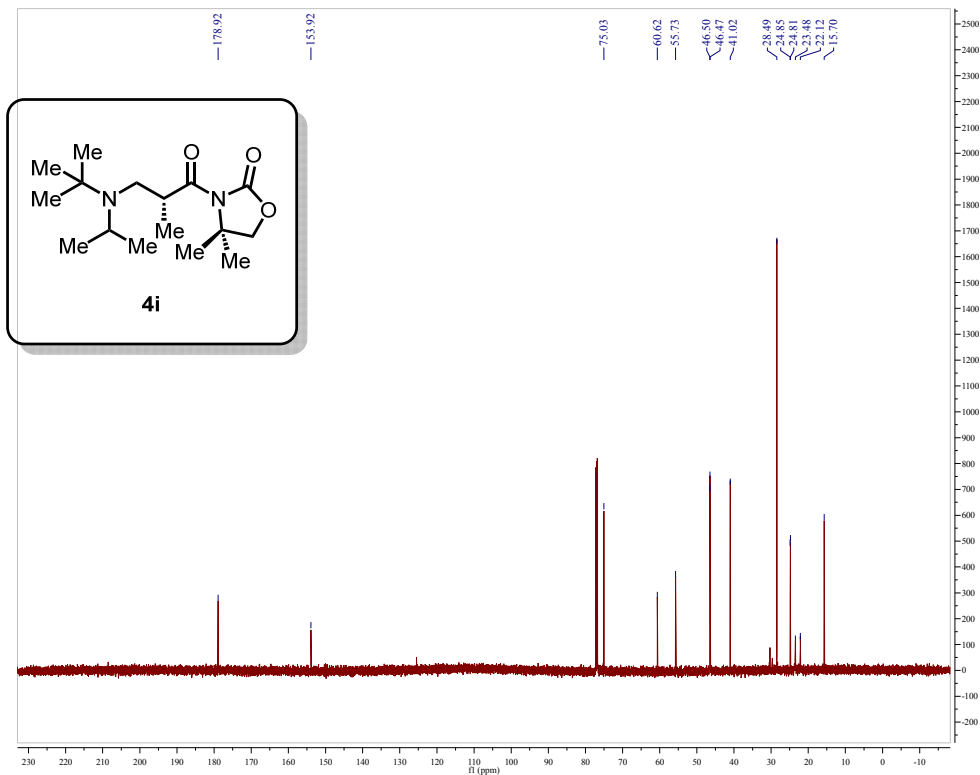

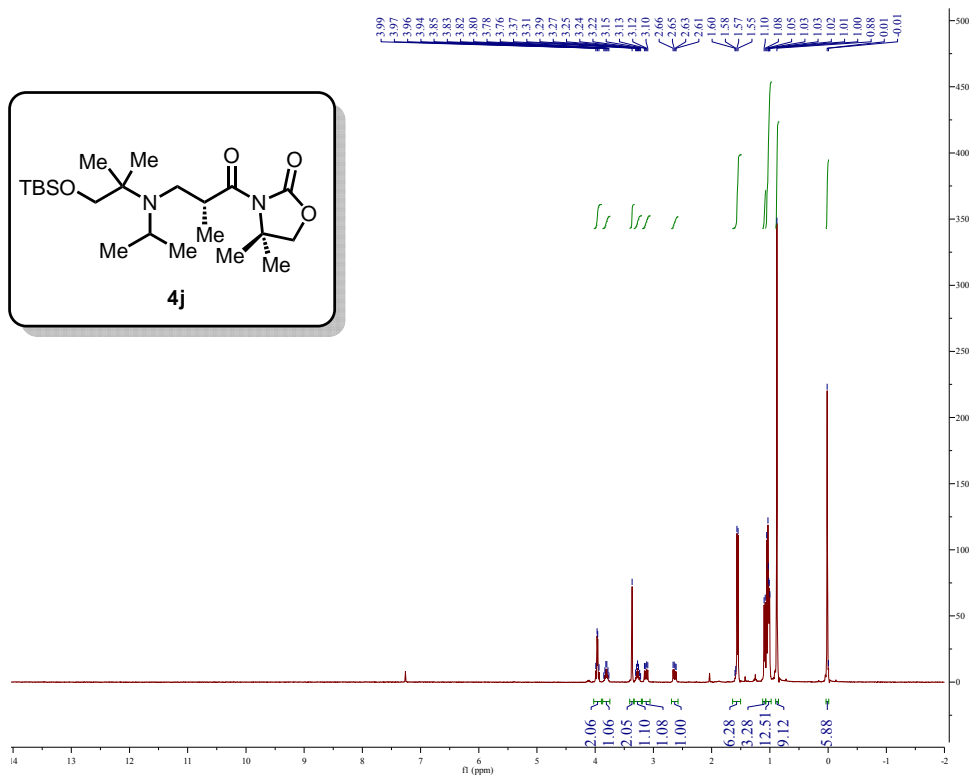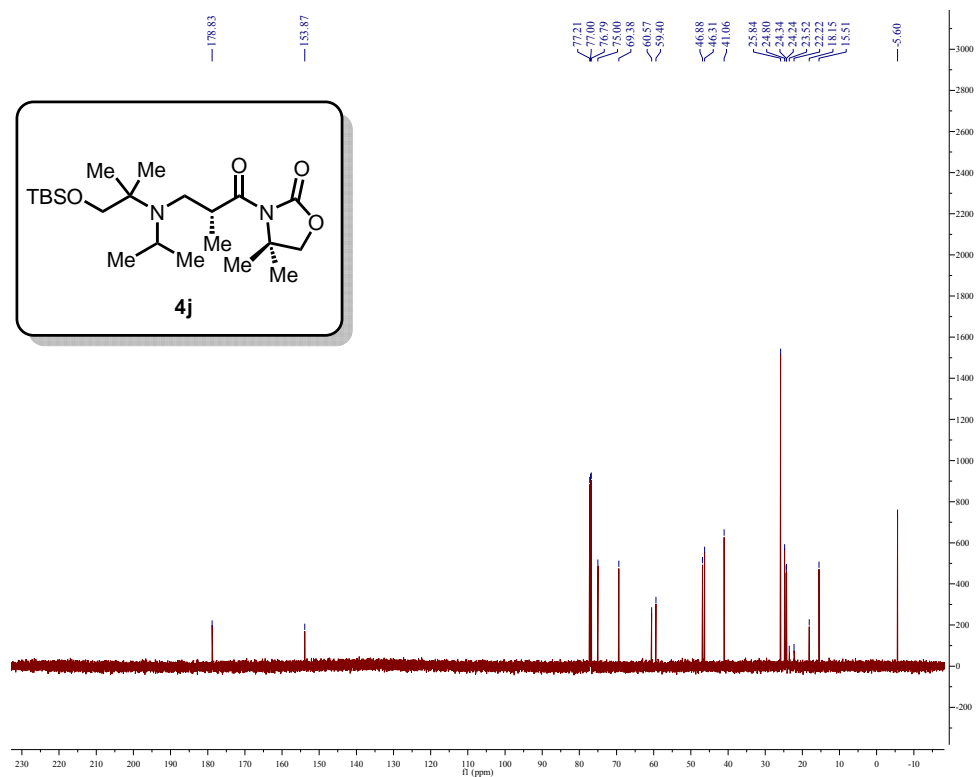



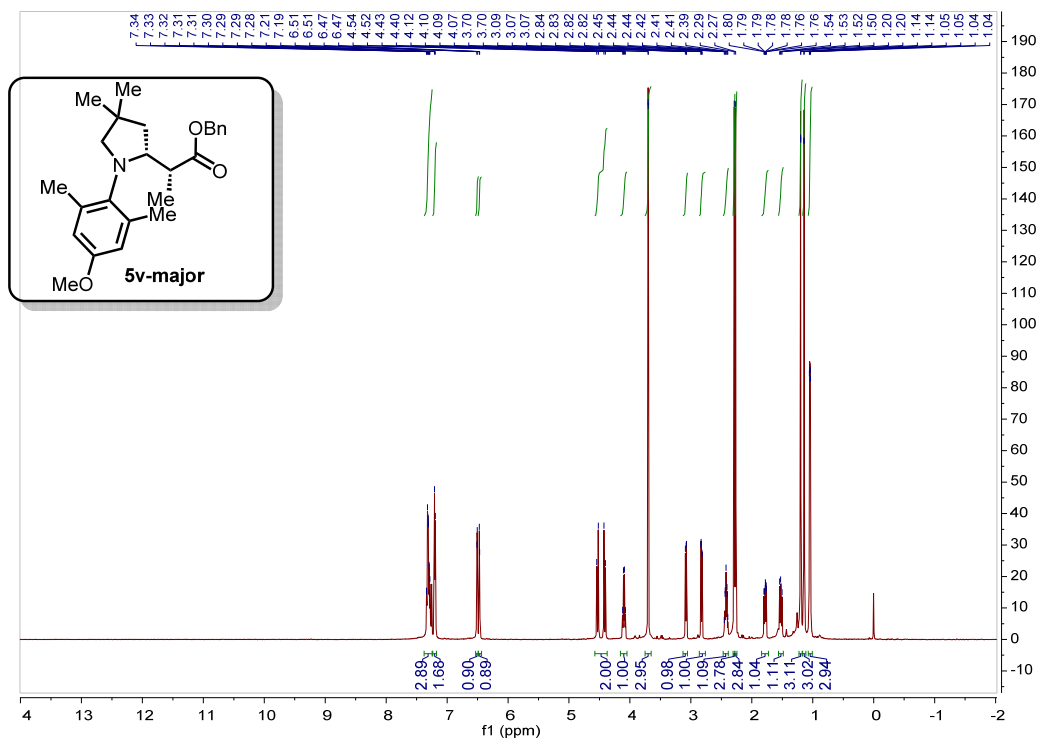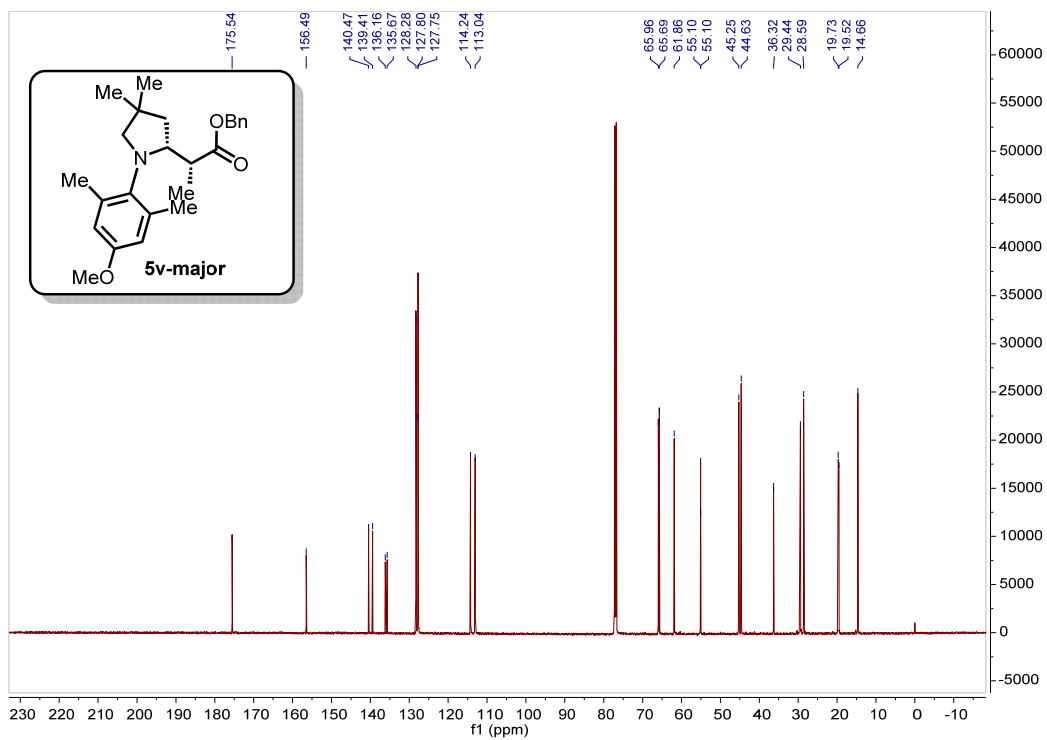

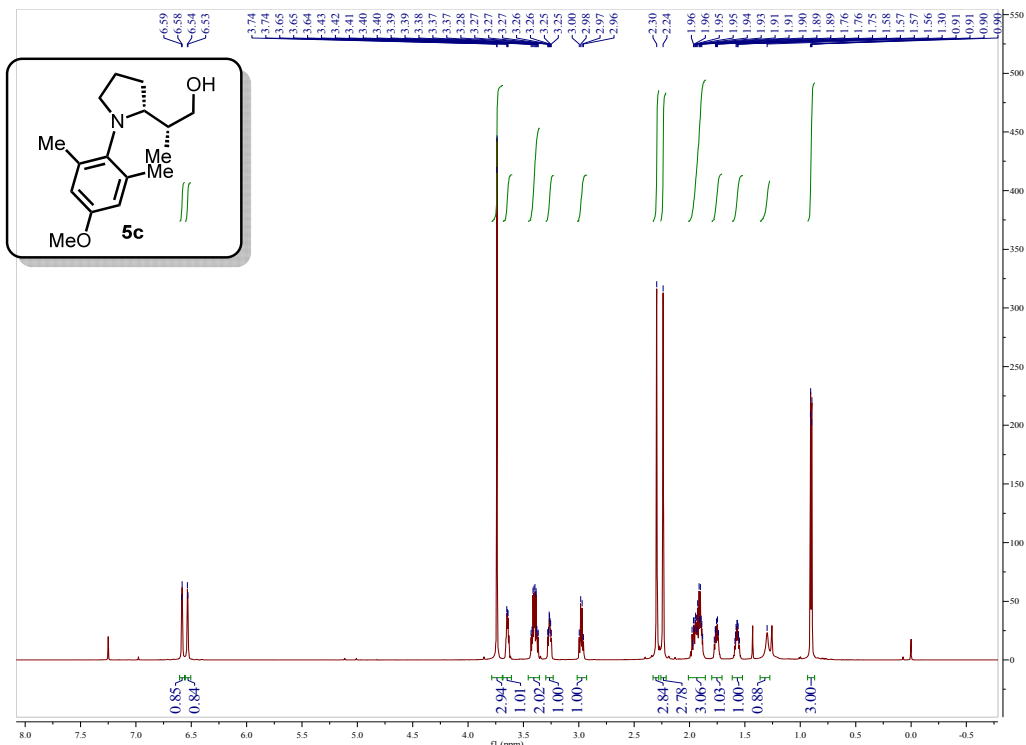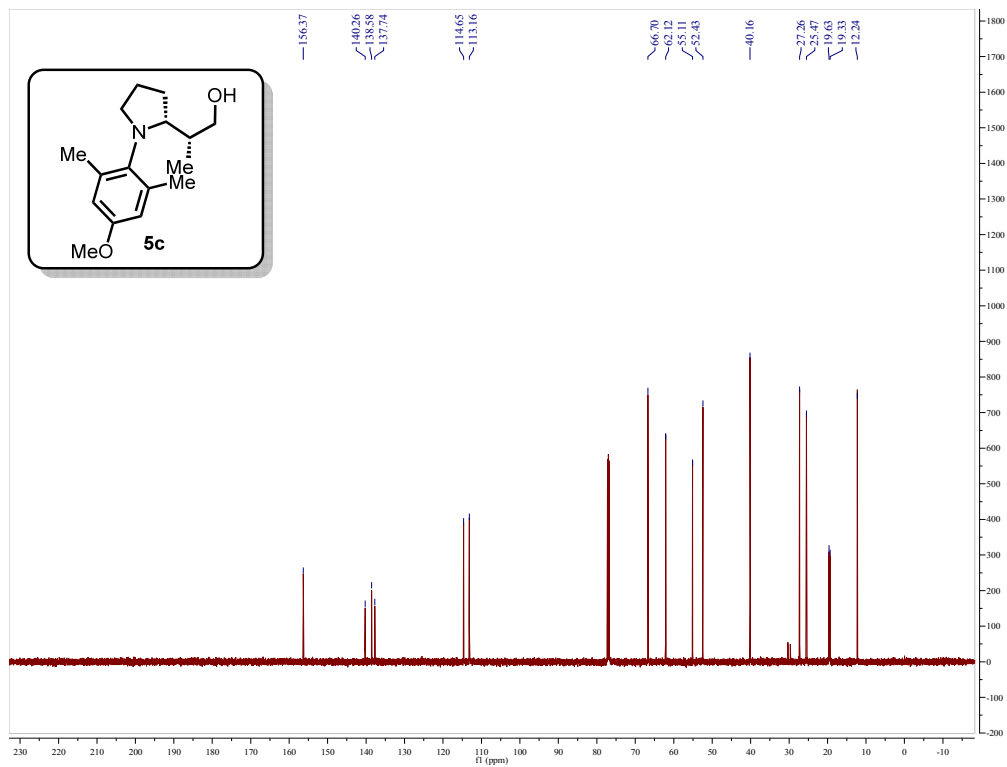

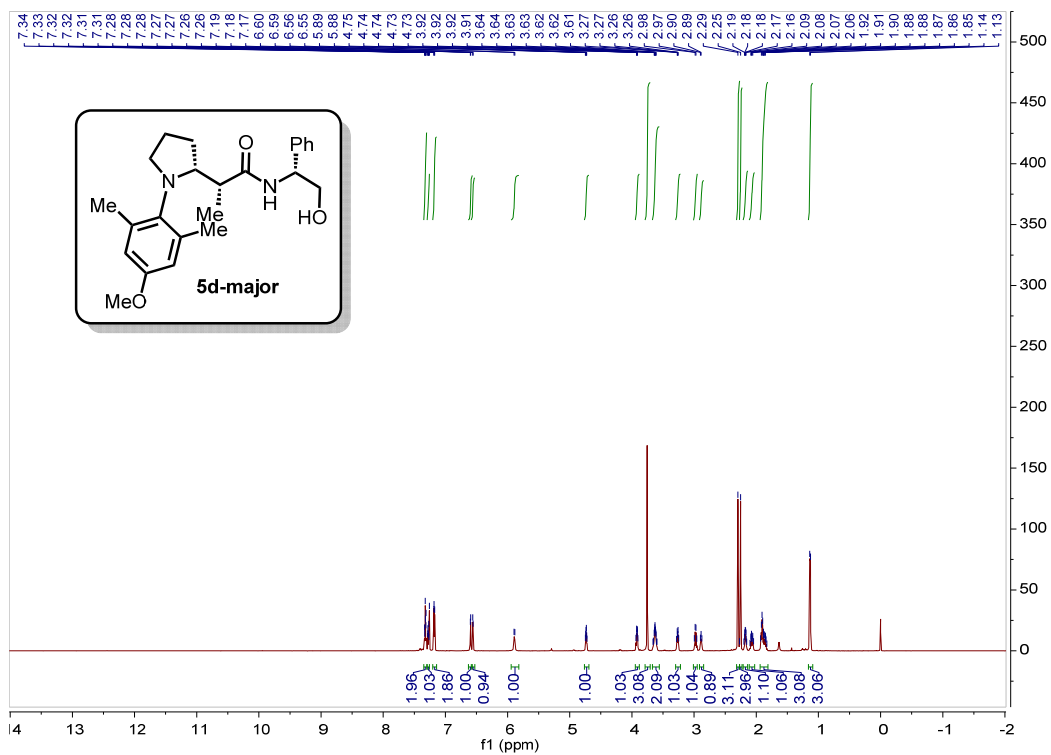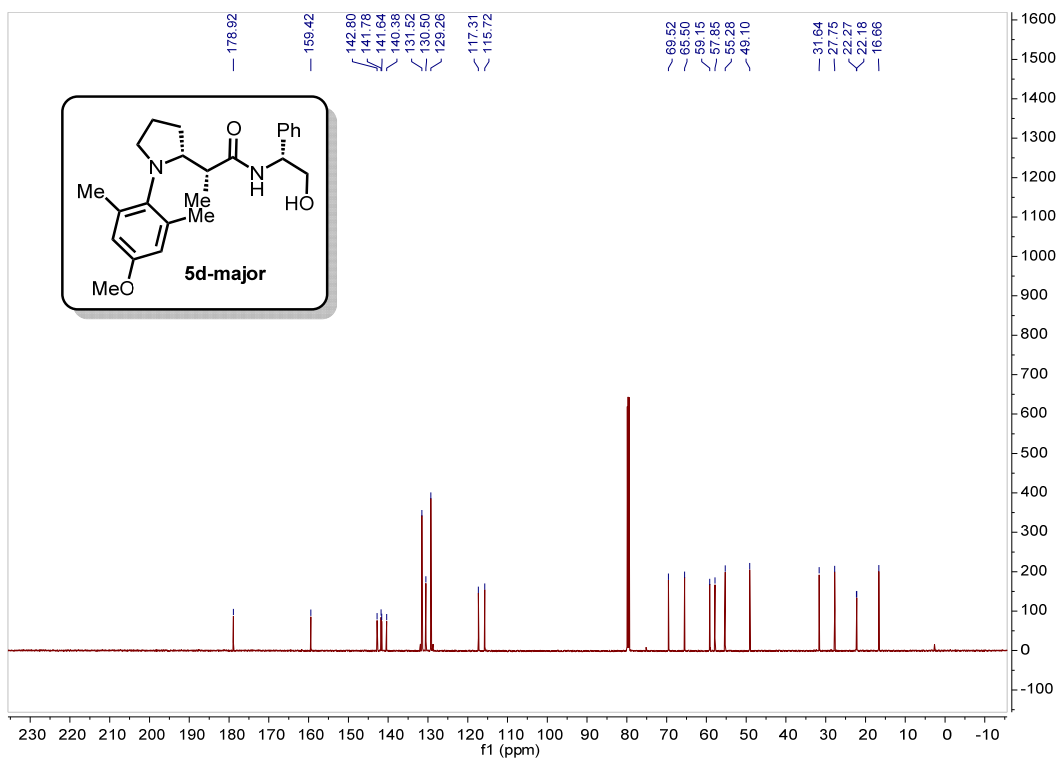

**9. X-Ray Crystallography Data of 5d-major and 5d-minor**  
**X-Ray Crystallography Data of 5d-major**

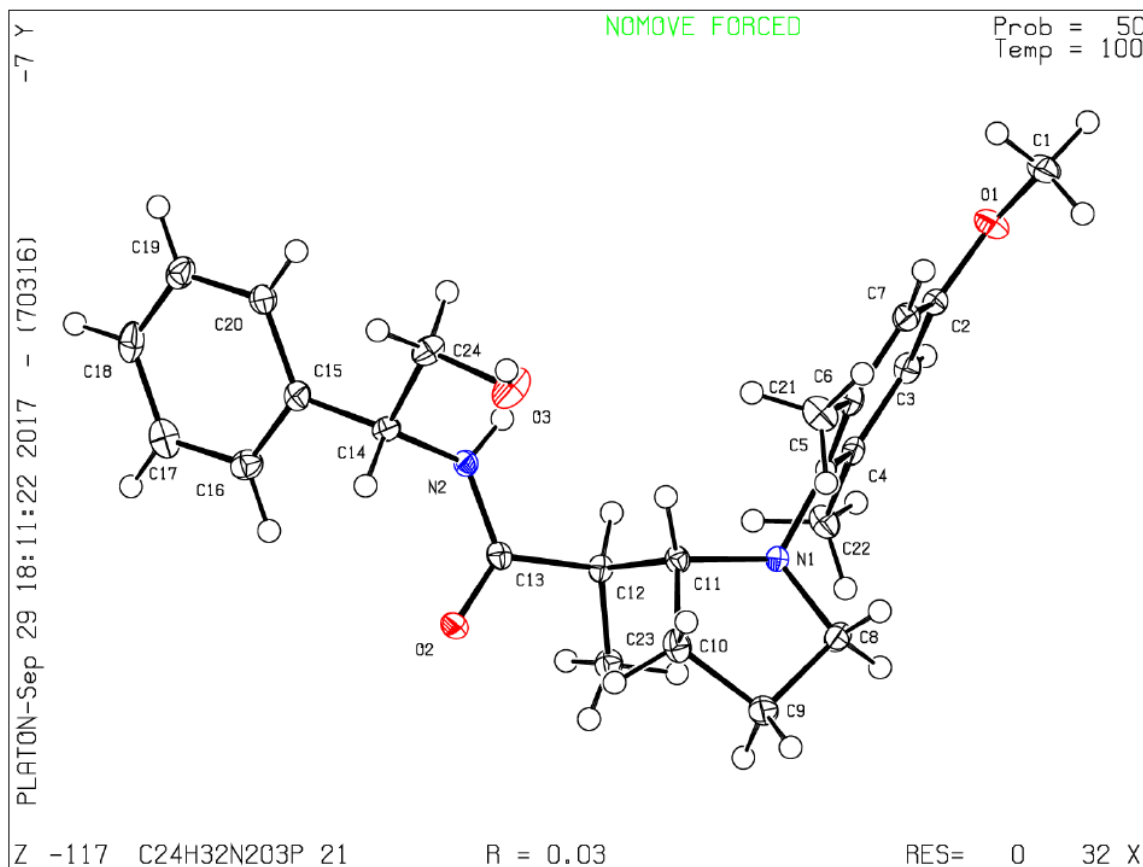

**Table SI-10.** Crystal data and structure refinement for  $C_{24}H_{32}N_2O_3$ .

|                      |                             |                            |
|----------------------|-----------------------------|----------------------------|
| Identification code  | $C_{24}H_{32}N_2O_3$        |                            |
| Empirical formula    | C24 H32 N2 O3               |                            |
| Formula weight       | 396.51                      |                            |
| Temperature          | 100(2) K                    |                            |
| Wavelength           | 1.54178 Å                   |                            |
| Crystal system       | Monoclinic                  |                            |
| Space group          | $P2_1$                      |                            |
| Unit cell dimensions | $a = 9.6090(4)$ Å           | $a = 90^\circ$ .           |
|                      | $b = 8.9512(4)$ Å           | $b = 101.0730(10)^\circ$ . |
|                      | $c = 12.4737(5)$ Å          | $g = 90^\circ$ .           |
| Volume               | $1052.92(8)$ Å <sup>3</sup> |                            |
| Z                    | 2                           |                            |

|                                   |                                             |
|-----------------------------------|---------------------------------------------|
| Density (calculated)              | 1.251 Mg/m <sup>3</sup>                     |
| Absorption coefficient            | 0.653 mm <sup>-1</sup>                      |
| F(000)                            | 428                                         |
| Crystal size                      | 0.560 x 0.460 x 0.280 mm <sup>3</sup>       |
| Theta range for data collection   | 3.611 to 66.644°.                           |
| Index ranges                      | -11<=h<=11, -10<=k<=10, -14<=l<=14          |
| Reflections collected             | 19999                                       |
| Independent reflections           | 3701 [R(int) = 0.0307]                      |
| Completeness to theta = 66.644°   | 99.2 %                                      |
| Absorption correction             | Semi-empirical from equivalents             |
| Max. and min. transmission        | 0.7528 and 0.6460                           |
| Refinement method                 | Full-matrix least-squares on F <sup>2</sup> |
| Data / restraints / parameters    | 3701 / 3 / 274                              |
| Goodness-of-fit on F <sup>2</sup> | 1.062                                       |
| Final R indices [I>2sigma(I)]     | R1 = 0.0265, wR2 = 0.0684                   |
| R indices (all data)              | R1 = 0.0265, wR2 = 0.0684                   |
| Absolute structure parameter      | 0.00(4)                                     |
| Extinction coefficient            | n/a                                         |
| Largest diff. peak and hole       | 0.202 and -0.152 e.Å <sup>-3</sup>          |

**Table SI-11.** Atomic coordinates ( $\times 10^4$ ) and equivalent isotropic displacement parameters ( $\text{\AA}^2 \times 10^3$ ) for  $\text{C}_{24}\text{H}_{32}\text{N}_2\text{O}_3$ .  $U(\text{eq})$  is defined as one third of the trace of the orthogonalized  $U_{ij}$  tensor.

|       | x       | y        | z       | $U(\text{eq})$ |
|-------|---------|----------|---------|----------------|
| O(1)  | 3778(1) | 479(1)   | 3668(1) | 19(1)          |
| O(2)  | 3233(1) | 7976(1)  | 8767(1) | 18(1)          |
| O(3)  | 5761(1) | 4564(2)  | 9403(1) | 24(1)          |
| N(1)  | 1480(1) | 4266(2)  | 6437(1) | 13(1)          |
| N(2)  | 5086(1) | 7038(2)  | 8098(1) | 12(1)          |
| C(1)  | 4082(2) | -1055(2) | 3948(2) | 21(1)          |
| C(2)  | 3296(2) | 1369(2)  | 4423(1) | 15(1)          |
| C(3)  | 2672(2) | 2705(2)  | 4018(1) | 15(1)          |
| C(4)  | 2108(2) | 3670(2)  | 4694(1) | 14(1)          |
| C(5)  | 2169(2) | 3294(2)  | 5797(1) | 12(1)          |
| C(6)  | 2841(2) | 1965(2)  | 6215(1) | 14(1)          |
| C(7)  | 3406(2) | 1008(2)  | 5518(2) | 15(1)          |
| C(8)  | 88(2)   | 3780(2)  | 6616(1) | 17(1)          |
| C(9)  | -193(2) | 4773(2)  | 7542(2) | 18(1)          |
| C(10) | 1290(2) | 5034(2)  | 8226(1) | 17(1)          |
| C(11) | 2283(2) | 5042(2)  | 7394(1) | 13(1)          |
| C(12) | 2722(2) | 6636(2)  | 7062(1) | 13(1)          |
| C(13) | 3703(2) | 7297(2)  | 8049(1) | 12(1)          |
| C(14) | 6166(2) | 7167(2)  | 9095(1) | 14(1)          |
| C(15) | 7229(2) | 8400(2)  | 9002(1) | 14(1)          |
| C(16) | 6755(2) | 9878(2)  | 8888(2) | 19(1)          |
| C(17) | 7683(2) | 11043(2) | 8816(2) | 22(1)          |
| C(18) | 9111(2) | 10750(2) | 8856(2) | 21(1)          |
| C(19) | 9598(2) | 9294(2)  | 8968(1) | 20(1)          |
| C(20) | 8666(2) | 8124(2)  | 9044(1) | 16(1)          |
| C(21) | 3003(2) | 1548(2)  | 7406(2) | 20(1)          |
| C(22) | 1424(2) | 5109(2)  | 4235(1) | 18(1)          |
| C(23) | 1464(2) | 7650(2)  | 6638(1) | 16(1)          |
| C(24) | 6834(2) | 5629(2)  | 9354(2) | 18(1)          |

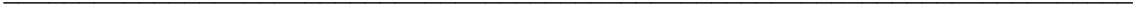

**Table SI-12.** Bond lengths [ $\text{\AA}$ ] and angles [ $^\circ$ ] for  $\text{C}_{24}\text{H}_{32}\text{N}_2\text{O}_3$ .

---

|              |           |
|--------------|-----------|
| O(1)-C(2)    | 1.380(2)  |
| O(1)-C(1)    | 1.434(2)  |
| O(2)-C(13)   | 1.236(2)  |
| O(3)-C(24)   | 1.415(2)  |
| O(3)-H(3O)   | 0.85(2)   |
| N(1)-C(5)    | 1.427(2)  |
| N(1)-C(8)    | 1.464(2)  |
| N(1)-C(11)   | 1.466(2)  |
| N(2)-C(13)   | 1.339(2)  |
| N(2)-C(14)   | 1.464(2)  |
| N(2)-H(2N)   | 0.854(18) |
| C(1)-H(1A)   | 0.9800    |
| C(1)-H(1B)   | 0.9800    |
| C(1)-H(1C)   | 0.9800    |
| C(2)-C(7)    | 1.388(3)  |
| C(2)-C(3)    | 1.390(2)  |
| C(3)-C(4)    | 1.388(2)  |
| C(3)-H(3A)   | 0.9500    |
| C(4)-C(5)    | 1.407(2)  |
| C(4)-C(22)   | 1.508(2)  |
| C(5)-C(6)    | 1.405(2)  |
| C(6)-C(7)    | 1.402(3)  |
| C(6)-C(21)   | 1.510(2)  |
| C(7)-H(7)    | 0.9500    |
| C(8)-C(9)    | 1.523(2)  |
| C(8)-H(8A)   | 0.9900    |
| C(8)-H(8B)   | 0.9900    |
| C(9)-C(10)   | 1.532(2)  |
| C(9)-H(9A)   | 0.9900    |
| C(9)-H(9B)   | 0.9900    |
| C(10)-C(11)  | 1.539(2)  |
| C(10)-H(10A) | 0.9900    |
| C(10)-H(10B) | 0.9900    |



|                  |            |
|------------------|------------|
| C(11)-C(12)      | 1.566(2)   |
| C(11)-H(11)      | 1.0000     |
| C(12)-C(13)      | 1.520(2)   |
| C(12)-C(23)      | 1.523(2)   |
| C(12)-H(12)      | 1.0000     |
| C(14)-C(15)      | 1.524(2)   |
| C(14)-C(24)      | 1.527(2)   |
| C(14)-H(14)      | 1.0000     |
| C(15)-C(20)      | 1.394(2)   |
| C(15)-C(16)      | 1.397(3)   |
| C(16)-C(17)      | 1.386(3)   |
| C(16)-H(16)      | 0.9500     |
| C(17)-C(18)      | 1.389(3)   |
| C(17)-H(17)      | 0.9500     |
| C(18)-C(19)      | 1.383(3)   |
| C(18)-H(18)      | 0.9500     |
| C(19)-C(20)      | 1.393(3)   |
| C(19)-H(19)      | 0.9500     |
| C(20)-H(20)      | 0.9500     |
| C(21)-H(21A)     | 0.9800     |
| C(21)-H(21B)     | 0.9800     |
| C(21)-H(21C)     | 0.9800     |
| C(22)-H(22A)     | 0.9800     |
| C(22)-H(22B)     | 0.9800     |
| C(22)-H(22C)     | 0.9800     |
| C(23)-H(23A)     | 0.9800     |
| C(23)-H(23B)     | 0.9800     |
| C(23)-H(23C)     | 0.9800     |
| C(24)-H(24A)     | 0.9900     |
| C(24)-H(24B)     | 0.9900     |
| <br>             |            |
| C(2)-O(1)-C(1)   | 117.77(14) |
| C(24)-O(3)-H(3O) | 107.4(18)  |
| C(5)-N(1)-C(8)   | 116.10(14) |
| C(5)-N(1)-C(11)  | 121.06(13) |

|                  |            |
|------------------|------------|
| C(8)-N(1)-C(11)  | 111.76(13) |
| C(13)-N(2)-C(14) | 124.06(14) |
| C(13)-N(2)-H(2N) | 117.4(14)  |
| C(14)-N(2)-H(2N) | 116.3(14)  |
| O(1)-C(1)-H(1A)  | 109.5      |
| O(1)-C(1)-H(1B)  | 109.5      |
| H(1A)-C(1)-H(1B) | 109.5      |
| O(1)-C(1)-H(1C)  | 109.5      |
| H(1A)-C(1)-H(1C) | 109.5      |
| H(1B)-C(1)-H(1C) | 109.5      |
| O(1)-C(2)-C(7)   | 124.44(16) |
| O(1)-C(2)-C(3)   | 115.22(15) |
| C(7)-C(2)-C(3)   | 120.33(15) |
| C(4)-C(3)-C(2)   | 120.41(15) |
| C(4)-C(3)-H(3A)  | 119.8      |
| C(2)-C(3)-H(3A)  | 119.8      |
| C(3)-C(4)-C(5)   | 119.86(16) |
| C(3)-C(4)-C(22)  | 119.57(15) |
| C(5)-C(4)-C(22)  | 120.57(15) |
| C(6)-C(5)-C(4)   | 119.67(15) |
| C(6)-C(5)-N(1)   | 122.55(15) |
| C(4)-C(5)-N(1)   | 117.71(15) |
| C(7)-C(6)-C(5)   | 119.52(16) |
| C(7)-C(6)-C(21)  | 118.62(16) |
| C(5)-C(6)-C(21)  | 121.84(16) |
| C(2)-C(7)-C(6)   | 120.14(16) |
| C(2)-C(7)-H(7)   | 119.9      |
| C(6)-C(7)-H(7)   | 119.9      |
| N(1)-C(8)-C(9)   | 103.99(14) |
| N(1)-C(8)-H(8A)  | 111.0      |
| C(9)-C(8)-H(8A)  | 111.0      |
| N(1)-C(8)-H(8B)  | 111.0      |
| C(9)-C(8)-H(8B)  | 111.0      |
| H(8A)-C(8)-H(8B) | 109.0      |
| C(8)-C(9)-C(10)  | 103.33(14) |

|                     |            |
|---------------------|------------|
| C(8)-C(9)-H(9A)     | 111.1      |
| C(10)-C(9)-H(9A)    | 111.1      |
| C(8)-C(9)-H(9B)     | 111.1      |
| C(10)-C(9)-H(9B)    | 111.1      |
| H(9A)-C(9)-H(9B)    | 109.1      |
| C(9)-C(10)-C(11)    | 104.84(14) |
| C(9)-C(10)-H(10A)   | 110.8      |
| C(11)-C(10)-H(10A)  | 110.8      |
| C(9)-C(10)-H(10B)   | 110.8      |
| C(11)-C(10)-H(10B)  | 110.8      |
| H(10A)-C(10)-H(10B) | 108.9      |
| N(1)-C(11)-C(10)    | 104.45(13) |
| N(1)-C(11)-C(12)    | 110.05(13) |
| C(10)-C(11)-C(12)   | 114.55(14) |
| N(1)-C(11)-H(11)    | 109.2      |
| C(10)-C(11)-H(11)   | 109.2      |
| C(12)-C(11)-H(11)   | 109.2      |
| C(13)-C(12)-C(23)   | 112.13(14) |
| C(13)-C(12)-C(11)   | 107.31(14) |
| C(23)-C(12)-C(11)   | 113.50(14) |
| C(13)-C(12)-H(12)   | 107.9      |
| C(23)-C(12)-H(12)   | 107.9      |
| C(11)-C(12)-H(12)   | 107.9      |
| O(2)-C(13)-N(2)     | 123.33(15) |
| O(2)-C(13)-C(12)    | 121.49(15) |
| N(2)-C(13)-C(12)    | 115.13(14) |
| N(2)-C(14)-C(15)    | 111.66(14) |
| N(2)-C(14)-C(24)    | 108.00(14) |
| C(15)-C(14)-C(24)   | 114.08(13) |
| N(2)-C(14)-H(14)    | 107.6      |
| C(15)-C(14)-H(14)   | 107.6      |
| C(24)-C(14)-H(14)   | 107.6      |
| C(20)-C(15)-C(16)   | 118.26(17) |
| C(20)-C(15)-C(14)   | 122.85(16) |
| C(16)-C(15)-C(14)   | 118.87(15) |

|                     |            |
|---------------------|------------|
| C(17)-C(16)-C(15)   | 121.15(17) |
| C(17)-C(16)-H(16)   | 119.4      |
| C(15)-C(16)-H(16)   | 119.4      |
| C(16)-C(17)-C(18)   | 119.96(18) |
| C(16)-C(17)-H(17)   | 120.0      |
| C(18)-C(17)-H(17)   | 120.0      |
| C(19)-C(18)-C(17)   | 119.60(17) |
| C(19)-C(18)-H(18)   | 120.2      |
| C(17)-C(18)-H(18)   | 120.2      |
| C(18)-C(19)-C(20)   | 120.45(17) |
| C(18)-C(19)-H(19)   | 119.8      |
| C(20)-C(19)-H(19)   | 119.8      |
| C(19)-C(20)-C(15)   | 120.58(17) |
| C(19)-C(20)-H(20)   | 119.7      |
| C(15)-C(20)-H(20)   | 119.7      |
| C(6)-C(21)-H(21A)   | 109.5      |
| C(6)-C(21)-H(21B)   | 109.5      |
| H(21A)-C(21)-H(21B) | 109.5      |
| C(6)-C(21)-H(21C)   | 109.5      |
| H(21A)-C(21)-H(21C) | 109.5      |
| H(21B)-C(21)-H(21C) | 109.5      |
| C(4)-C(22)-H(22A)   | 109.5      |
| C(4)-C(22)-H(22B)   | 109.5      |
| H(22A)-C(22)-H(22B) | 109.5      |
| C(4)-C(22)-H(22C)   | 109.5      |
| H(22A)-C(22)-H(22C) | 109.5      |
| H(22B)-C(22)-H(22C) | 109.5      |
| C(12)-C(23)-H(23A)  | 109.5      |
| C(12)-C(23)-H(23B)  | 109.5      |
| H(23A)-C(23)-H(23B) | 109.5      |
| C(12)-C(23)-H(23C)  | 109.5      |
| H(23A)-C(23)-H(23C) | 109.5      |
| H(23B)-C(23)-H(23C) | 109.5      |
| O(3)-C(24)-C(14)    | 109.66(14) |
| O(3)-C(24)-H(24A)   | 109.7      |

|                     |       |
|---------------------|-------|
| C(14)-C(24)-H(24A)  | 109.7 |
| O(3)-C(24)-H(24B)   | 109.7 |
| C(14)-C(24)-H(24B)  | 109.7 |
| H(24A)-C(24)-H(24B) | 108.2 |

---

Symmetry transformations used to generate equivalent atoms:

**Table SI-13.** Anisotropic displacement parameters ( $\text{\AA}^2 \times 10^3$ ) for  $\text{C}_{24}\text{H}_{32}\text{N}_2\text{O}_3$ . The anisotropic displacement factor exponent takes the form:  $-2p^2 [ h^2 a^* 2U^{11} + \dots + 2 h k a^* b^* U^{12} ]$

|       | U <sup>11</sup> | U <sup>22</sup> | U <sup>33</sup> | U <sup>23</sup> | U <sup>13</sup> | U <sup>12</sup> |
|-------|-----------------|-----------------|-----------------|-----------------|-----------------|-----------------|
| O(1)  | 24(1)           | 17(1)           | 18(1)           | -1(1)           | 9(1)            | 4(1)            |
| O(2)  | 15(1)           | 19(1)           | 19(1)           | -7(1)           | 1(1)            | 3(1)            |
| O(3)  | 20(1)           | 25(1)           | 26(1)           | 14(1)           | -1(1)           | -4(1)           |
| N(1)  | 11(1)           | 14(1)           | 13(1)           | -3(1)           | 1(1)            | -1(1)           |
| N(2)  | 13(1)           | 14(1)           | 10(1)           | -2(1)           | 2(1)            | -1(1)           |
| C(1)  | 21(1)           | 16(1)           | 26(1)           | -2(1)           | 7(1)            | 4(1)            |
| C(2)  | 12(1)           | 16(1)           | 17(1)           | -3(1)           | 4(1)            | -2(1)           |
| C(3)  | 16(1)           | 17(1)           | 11(1)           | 1(1)            | 2(1)            | -2(1)           |
| C(4)  | 12(1)           | 14(1)           | 14(1)           | -1(1)           | -1(1)           | -3(1)           |
| C(5)  | 11(1)           | 12(1)           | 13(1)           | -2(1)           | 2(1)            | -4(1)           |
| C(6)  | 13(1)           | 13(1)           | 16(1)           | 1(1)            | 2(1)            | -4(1)           |
| C(7)  | 14(1)           | 11(1)           | 20(1)           | 2(1)            | 2(1)            | 0(1)            |
| C(8)  | 13(1)           | 21(1)           | 18(1)           | -3(1)           | 3(1)            | -3(1)           |
| C(9)  | 18(1)           | 18(1)           | 19(1)           | -3(1)           | 8(1)            | -2(1)           |
| C(10) | 22(1)           | 17(1)           | 13(1)           | -1(1)           | 4(1)            | -3(1)           |
| C(11) | 14(1)           | 12(1)           | 12(1)           | 0(1)            | 1(1)            | 0(1)            |
| C(12) | 13(1)           | 13(1)           | 12(1)           | 0(1)            | 1(1)            | -1(1)           |
| C(13) | 15(1)           | 8(1)            | 13(1)           | 2(1)            | 2(1)            | 0(1)            |
| C(14) | 12(1)           | 19(1)           | 10(1)           | 0(1)            | 2(1)            | 1(1)            |
| C(15) | 16(1)           | 20(1)           | 7(1)            | -2(1)           | 1(1)            | -1(1)           |
| C(16) | 17(1)           | 21(1)           | 17(1)           | 1(1)            | 2(1)            | 2(1)            |
| C(17) | 30(1)           | 18(1)           | 18(1)           | -1(1)           | 2(1)            | -2(1)           |
| C(18) | 25(1)           | 25(1)           | 14(1)           | -3(1)           | 3(1)            | -11(1)          |
| C(19) | 16(1)           | 29(1)           | 15(1)           | -6(1)           | 3(1)            | -5(1)           |
| C(20) | 16(1)           | 21(1)           | 11(1)           | -4(1)           | 1(1)            | 0(1)            |
| C(21) | 28(1)           | 17(1)           | 16(1)           | 4(1)            | 5(1)            | 2(1)            |
| C(22) | 24(1)           | 15(1)           | 13(1)           | 0(1)            | 1(1)            | 2(1)            |
| C(23) | 16(1)           | 15(1)           | 16(1)           | 1(1)            | 0(1)            | 0(1)            |
| C(24) | 14(1)           | 20(1)           | 19(1)           | 5(1)            | 2(1)            | 0(1)            |



**Table SI-14.** Hydrogen coordinates ( $\times 10^4$ ) and isotropic displacement parameters ( $\text{\AA}^2 \times 10^3$ ) for  $\text{C}_{24}\text{H}_{32}\text{N}_2\text{O}_3$ .

|        | x        | y        | z        | U(eq) |
|--------|----------|----------|----------|-------|
| H(3O)  | 6050(30) | 4010(30) | 9961(19) | 34(7) |
| H(2N)  | 5320(20) | 6540(20) | 7575(16) | 12(5) |
| H(1A)  | 4909     | -1113    | 4545     | 31    |
| H(1B)  | 4284     | -1591    | 3310     | 31    |
| H(1C)  | 3263     | -1512    | 4182     | 31    |
| H(3A)  | 2630     | 2960     | 3273     | 18    |
| H(7)   | 3866     | 110      | 5797     | 18    |
| H(8A)  | 105      | 2713     | 6827     | 21    |
| H(8B)  | -647     | 3927     | 5950     | 21    |
| H(9A)  | -814     | 4266     | 7976     | 21    |
| H(9B)  | -639     | 5727     | 7258     | 21    |
| H(10A) | 1551     | 4224     | 8767     | 20    |
| H(10B) | 1334     | 6001     | 8617     | 20    |
| H(11)  | 3156     | 4455     | 7694     | 15    |
| H(12)  | 3277     | 6515     | 6467     | 16    |
| H(14)  | 5672     | 7442     | 9704     | 16    |
| H(16)  | 5779     | 10088    | 8859     | 22    |
| H(17)  | 7342     | 12041    | 8738     | 27    |
| H(18)  | 9750     | 11546    | 8806     | 26    |
| H(19)  | 10574    | 9090     | 8995     | 24    |
| H(20)  | 9013     | 7128     | 9124     | 20    |
| H(21A) | 3183     | 473      | 7492     | 30    |
| H(21B) | 2130     | 1798     | 7664     | 30    |
| H(21C) | 3800     | 2101     | 7834     | 30    |
| H(22A) | 467      | 5178     | 4397     | 26    |
| H(22B) | 1366     | 5128     | 3442     | 26    |
| H(22C) | 1993     | 5957     | 4568     | 26    |
| H(23A) | 980      | 7902     | 7238     | 24    |
| H(23B) | 802      | 7132     | 6061     | 24    |



|        |      |      |       |    |
|--------|------|------|-------|----|
| H(23C) | 1800 | 8567 | 6342  | 24 |
| H(24A) | 7368 | 5341 | 8782  | 22 |
| H(24B) | 7506 | 5662 | 10063 | 22 |

---

**Table SI-15.** Torsion angles [°] for C<sub>24</sub>H<sub>32</sub>N<sub>2</sub>O<sub>3</sub>.

---

|                        |             |
|------------------------|-------------|
| C(1)-O(1)-C(2)-C(7)    | 16.3(2)     |
| C(1)-O(1)-C(2)-C(3)    | -163.85(15) |
| O(1)-C(2)-C(3)-C(4)    | 178.00(15)  |
| C(7)-C(2)-C(3)-C(4)    | -2.2(2)     |
| C(2)-C(3)-C(4)-C(5)    | 0.0(2)      |
| C(2)-C(3)-C(4)-C(22)   | -179.48(15) |
| C(3)-C(4)-C(5)-C(6)    | 2.0(2)      |
| C(22)-C(4)-C(5)-C(6)   | -178.54(15) |
| C(3)-C(4)-C(5)-N(1)    | -175.27(14) |
| C(22)-C(4)-C(5)-N(1)   | 4.2(2)      |
| C(8)-N(1)-C(5)-C(6)    | -76.47(19)  |
| C(11)-N(1)-C(5)-C(6)   | 64.5(2)     |
| C(8)-N(1)-C(5)-C(4)    | 100.69(18)  |
| C(11)-N(1)-C(5)-C(4)   | -118.33(17) |
| C(4)-C(5)-C(6)-C(7)    | -1.8(2)     |
| N(1)-C(5)-C(6)-C(7)    | 175.31(15)  |
| C(4)-C(5)-C(6)-C(21)   | 176.78(16)  |
| N(1)-C(5)-C(6)-C(21)   | -6.1(2)     |
| O(1)-C(2)-C(7)-C(6)    | -177.86(15) |
| C(3)-C(2)-C(7)-C(6)    | 2.3(2)      |
| C(5)-C(6)-C(7)-C(2)    | -0.3(2)     |
| C(21)-C(6)-C(7)-C(2)   | -178.97(16) |
| C(5)-N(1)-C(8)-C(9)    | 165.36(14)  |
| C(11)-N(1)-C(8)-C(9)   | 20.86(19)   |
| N(1)-C(8)-C(9)-C(10)   | -32.52(18)  |
| C(8)-C(9)-C(10)-C(11)  | 32.71(18)   |
| C(5)-N(1)-C(11)-C(10)  | -142.80(15) |
| C(8)-N(1)-C(11)-C(10)  | -0.30(18)   |
| C(5)-N(1)-C(11)-C(12)  | 93.78(17)   |
| C(8)-N(1)-C(11)-C(12)  | -123.72(15) |
| C(9)-C(10)-C(11)-N(1)  | -20.34(17)  |
| C(9)-C(10)-C(11)-C(12) | 100.12(17)  |
| N(1)-C(11)-C(12)-C(13) | -172.91(13) |

|                         |             |
|-------------------------|-------------|
| C(10)-C(11)-C(12)-C(13) | 69.79(18)   |
| N(1)-C(11)-C(12)-C(23)  | 62.63(17)   |
| C(10)-C(11)-C(12)-C(23) | -54.7(2)    |
| C(14)-N(2)-C(13)-O(2)   | 16.3(3)     |
| C(14)-N(2)-C(13)-C(12)  | -161.18(15) |
| C(23)-C(12)-C(13)-O(2)  | 39.1(2)     |
| C(11)-C(12)-C(13)-O(2)  | -86.24(18)  |
| C(23)-C(12)-C(13)-N(2)  | -143.46(15) |
| C(11)-C(12)-C(13)-N(2)  | 91.25(16)   |
| C(13)-N(2)-C(14)-C(15)  | -116.08(17) |
| C(13)-N(2)-C(14)-C(24)  | 117.72(17)  |
| N(2)-C(14)-C(15)-C(20)  | -116.86(17) |
| C(24)-C(14)-C(15)-C(20) | 5.9(2)      |
| N(2)-C(14)-C(15)-C(16)  | 64.2(2)     |
| C(24)-C(14)-C(15)-C(16) | -172.99(16) |
| C(20)-C(15)-C(16)-C(17) | 0.1(3)      |
| C(14)-C(15)-C(16)-C(17) | 179.08(15)  |
| C(15)-C(16)-C(17)-C(18) | 0.0(3)      |
| C(16)-C(17)-C(18)-C(19) | 0.0(3)      |
| C(17)-C(18)-C(19)-C(20) | -0.1(3)     |
| C(18)-C(19)-C(20)-C(15) | 0.3(3)      |
| C(16)-C(15)-C(20)-C(19) | -0.2(2)     |
| C(14)-C(15)-C(20)-C(19) | -179.18(15) |
| N(2)-C(14)-C(24)-O(3)   | -54.14(18)  |
| C(15)-C(14)-C(24)-O(3)  | -178.91(13) |

---

Symmetry transformations used to generate equivalent atoms:

**Table SI-16.** Hydrogen bonds for C<sub>24</sub>H<sub>32</sub>N<sub>2</sub>O<sub>3</sub> [Å and °].

| D-H...A             | d(D-H)    | d(H...A)  | d(D...A)   | <(DHA)    |
|---------------------|-----------|-----------|------------|-----------|
| O(3)-H(3O)...O(2)#1 | 0.85(2)   | 1.85(2)   | 2.7054(18) | 175(3)    |
| N(2)-H(2N)...O(1)#2 | 0.854(18) | 2.139(19) | 2.9855(19) | 170.7(19) |

Symmetry transformations used to generate equivalent atoms:

#1 -x+1,y-1/2,-z+2    #2 -x+1,y+1/2,-z+1

## X-Ray Crystallography Data of 5d-minor

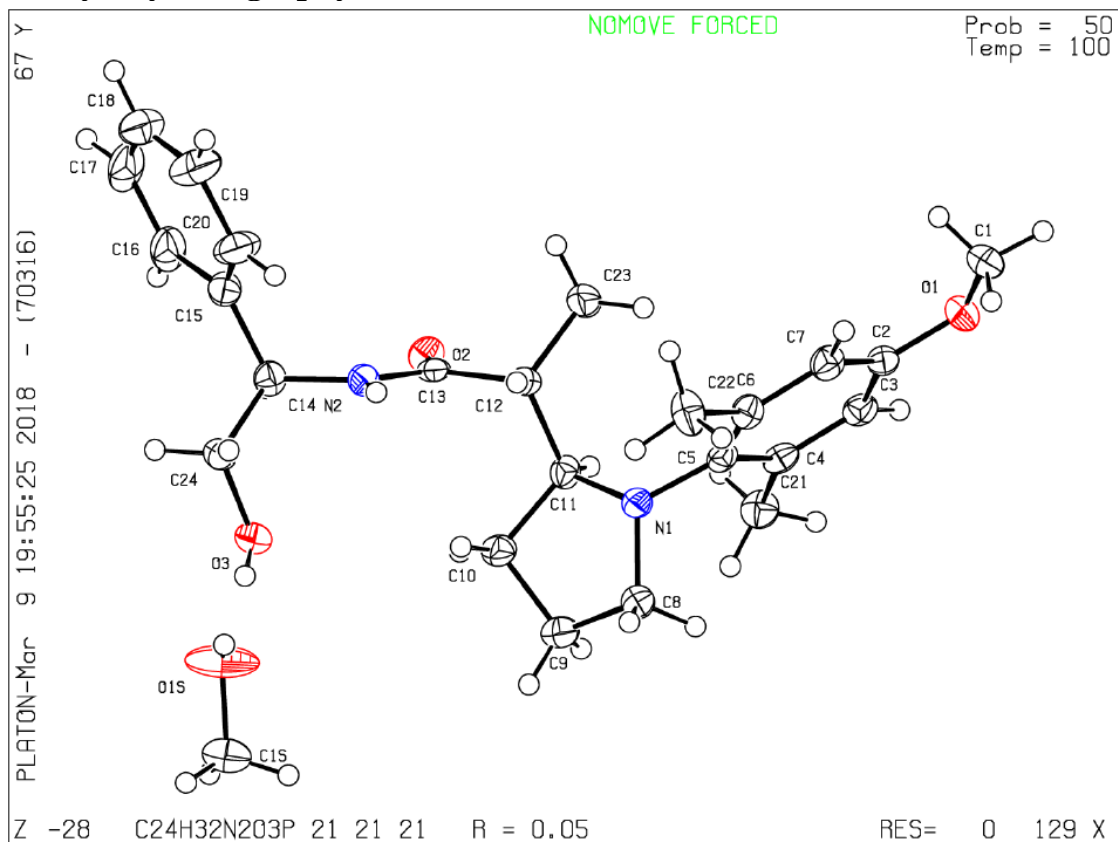

**Table SI-17.** Crystal data and structure refinement for  $C_{24}H_{32}N_2O_3(CH_3OH)$ .

|                        |                              |                       |
|------------------------|------------------------------|-----------------------|
| Identification code    | $C_{24}H_{32}N_2O_3(CH_3OH)$ |                       |
| Empirical formula      | $C_{25}H_{36}N_2O_4$         |                       |
| Formula weight         | 428.56                       |                       |
| Temperature            | 100(2) K                     |                       |
| Wavelength             | 1.54178 Å                    |                       |
| Crystal system         | Orthorhombic                 |                       |
| Space group            | $P2_12_12_1$                 |                       |
| Unit cell dimensions   | $a = 7.8167(3)$ Å            | $\alpha = 90^\circ$ . |
|                        | $b = 15.1723(5)$ Å           | $\beta = 90^\circ$ .  |
|                        | $c = 20.1325(7)$ Å           | $\gamma = 90^\circ$ . |
| Volume                 | $2387.66(15)$ Å <sup>3</sup> |                       |
| Z                      | 4                            |                       |
| Density (calculated)   | 1.192 Mg/m <sup>3</sup>      |                       |
| Absorption coefficient | 0.642 mm <sup>-1</sup>       |                       |
|                        | S-233                        |                       |

|                                   |                                             |
|-----------------------------------|---------------------------------------------|
| F(000)                            | 928                                         |
| Crystal size                      | 0.420 x 0.120 x 0.080 mm <sup>3</sup>       |
| Theta range for data collection   | 3.648 to 66.655°.                           |
| Index ranges                      | -9<=h<=9, -18<=k<=18, -23<=l<=23            |
| Reflections collected             | 16235                                       |
| Independent reflections           | 4210 [R(int) = 0.0707]                      |
| Completeness to theta = 66.655°   | 100.0 %                                     |
| Absorption correction             | Semi-empirical from equivalents             |
| Max. and min. transmission        | 0.7533 and 0.5967                           |
| Refinement method                 | Full-matrix least-squares on F <sup>2</sup> |
| Data / restraints / parameters    | 4210 / 3 / 291                              |
| Goodness-of-fit on F <sup>2</sup> | 1.026                                       |
| Final R indices [I>2sigma(I)]     | R1 = 0.0461, wR2 = 0.1154                   |
| R indices (all data)              | R1 = 0.0574, wR2 = 0.1232                   |
| Absolute structure parameter      | 0.4(2)                                      |
| Extinction coefficient            | n/a                                         |
| Largest diff. peak and hole       | 0.329 and -0.277 e.Å <sup>-3</sup>          |

**Table SI-18.** Atomic coordinates (  $\times 10^4$ ) and equivalent isotropic displacement parameters ( $\text{\AA}^2 \times 10^3$ ) for  $\text{C}_{24}\text{H}_{32}\text{N}_2\text{O}_3(\text{CH}_3\text{OH})$ .  $U(\text{eq})$  is defined as one third of the trace of the orthogonalized  $U_{ij}$  tensor.

|       | x       | y       | z       | U(eq) |
|-------|---------|---------|---------|-------|
| O(1)  | 6880(3) | 8180(2) | 6883(1) | 30(1) |
| O(2)  | 447(3)  | 3858(2) | 6329(1) | 27(1) |
| O(3)  | 844(3)  | 2292(2) | 4622(1) | 29(1) |
| N(1)  | 4030(3) | 5621(2) | 5210(1) | 23(1) |
| N(2)  | 2348(3) | 2929(2) | 5834(1) | 23(1) |
| C(1)  | 8564(5) | 8055(2) | 7136(2) | 34(1) |
| C(2)  | 6263(4) | 7545(2) | 6459(2) | 24(1) |
| C(3)  | 4600(5) | 7669(2) | 6227(2) | 26(1) |
| C(4)  | 3840(4) | 7059(2) | 5808(2) | 24(1) |
| C(5)  | 4759(4) | 6301(2) | 5619(2) | 22(1) |
| C(6)  | 6457(4) | 6202(2) | 5827(2) | 26(1) |
| C(7)  | 7195(4) | 6821(2) | 6252(2) | 27(1) |
| C(8)  | 3785(5) | 5818(2) | 4498(2) | 29(1) |
| C(9)  | 2138(5) | 5349(2) | 4310(2) | 34(1) |
| C(10) | 1970(5) | 4630(2) | 4834(2) | 28(1) |
| C(11) | 2608(4) | 5086(2) | 5465(2) | 24(1) |
| C(12) | 3190(4) | 4437(2) | 6013(2) | 22(1) |
| C(13) | 1866(4) | 3714(2) | 6078(2) | 22(1) |
| C(14) | 1262(4) | 2154(2) | 5799(2) | 25(1) |
| C(15) | 1653(5) | 1492(2) | 6348(2) | 32(1) |
| C(16) | 348(6)  | 1077(3) | 6685(2) | 43(1) |
| C(17) | 744(8)  | 456(3)  | 7186(2) | 56(1) |
| C(18) | 2407(8) | 270(3)  | 7337(2) | 55(1) |
| C(19) | 3694(8) | 661(3)  | 6996(2) | 58(1) |
| C(20) | 3326(6) | 1271(3) | 6503(2) | 43(1) |
| C(21) | 2027(4) | 7231(2) | 5579(2) | 31(1) |
| C(22) | 7494(5) | 5420(2) | 5612(2) | 35(1) |
| C(23) | 3432(5) | 4884(2) | 6690(2) | 32(1) |
| C(24) | 1480(4) | 1717(2) | 5124(2) | 26(1) |

|       |         |         |         |       |
|-------|---------|---------|---------|-------|
| C(1S) | 1972(5) | 2149(3) | 2839(2) | 41(1) |
| O(1S) | 2391(4) | 1889(3) | 3488(1) | 59(1) |

---



**Table SI-19.** Bond lengths [Å] and angles [°] for C<sub>24</sub>H<sub>32</sub>N<sub>2</sub>O<sub>3</sub>(CH<sub>3</sub>OH).

---

|              |          |
|--------------|----------|
| O(1)-C(2)    | 1.376(4) |
| O(1)-C(1)    | 1.424(4) |
| O(2)-C(13)   | 1.238(4) |
| O(3)-C(24)   | 1.422(4) |
| O(3)-H(3O)   | 0.84(2)  |
| N(1)-C(5)    | 1.438(4) |
| N(1)-C(11)   | 1.469(4) |
| N(1)-C(8)    | 1.476(4) |
| N(2)-C(13)   | 1.343(4) |
| N(2)-C(14)   | 1.452(4) |
| N(2)-H(2N)   | 0.88(2)  |
| C(1)-H(1A)   | 0.9800   |
| C(1)-H(1B)   | 0.9800   |
| C(1)-H(1C)   | 0.9800   |
| C(2)-C(7)    | 1.383(5) |
| C(2)-C(3)    | 1.394(5) |
| C(3)-C(4)    | 1.385(5) |
| C(3)-H(3)    | 0.9500   |
| C(4)-C(5)    | 1.408(5) |
| C(4)-C(21)   | 1.513(5) |
| C(5)-C(6)    | 1.399(5) |
| C(6)-C(7)    | 1.395(5) |
| C(6)-C(22)   | 1.501(5) |
| C(7)-H(7)    | 0.9500   |
| C(8)-C(9)    | 1.519(5) |
| C(8)-H(8A)   | 0.9900   |
| C(8)-H(8B)   | 0.9900   |
| C(9)-C(10)   | 1.523(5) |
| C(9)-H(9A)   | 0.9900   |
| C(9)-H(9B)   | 0.9900   |
| C(10)-C(11)  | 1.531(5) |
| C(10)-H(10A) | 0.9900   |
| C(10)-H(10B) | 0.9900   |

|              |          |
|--------------|----------|
| C(11)-C(12)  | 1.547(4) |
| C(11)-H(11)  | 1.0000   |
| C(12)-C(13)  | 1.514(5) |
| C(12)-C(23)  | 1.535(5) |
| C(12)-H(12)  | 1.0000   |
| C(14)-C(24)  | 1.522(4) |
| C(14)-C(15)  | 1.524(5) |
| C(14)-H(14)  | 1.0000   |
| C(15)-C(16)  | 1.378(5) |
| C(15)-C(20)  | 1.386(6) |
| C(16)-C(17)  | 1.414(7) |
| C(16)-H(16)  | 0.9500   |
| C(17)-C(18)  | 1.365(8) |
| C(17)-H(17)  | 0.9500   |
| C(18)-C(19)  | 1.355(8) |
| C(18)-H(18)  | 0.9500   |
| C(19)-C(20)  | 1.386(6) |
| C(19)-H(19)  | 0.9500   |
| C(20)-H(20)  | 0.9500   |
| C(21)-H(21A) | 0.9800   |
| C(21)-H(21B) | 0.9800   |
| C(21)-H(21C) | 0.9800   |
| C(22)-H(22A) | 0.9800   |
| C(22)-H(22B) | 0.9800   |
| C(22)-H(22C) | 0.9800   |
| C(23)-H(23A) | 0.9800   |
| C(23)-H(23B) | 0.9800   |
| C(23)-H(23C) | 0.9800   |
| C(24)-H(24A) | 0.9900   |
| C(24)-H(24B) | 0.9900   |
| C(1S)-O(1S)  | 1.403(5) |
| C(1S)-H(1S1) | 0.9800   |
| C(1S)-H(1S2) | 0.9800   |
| C(1S)-H(1S3) | 0.9800   |
| O(1S)-H(1SO) | 0.85(3)  |

|                  |          |
|------------------|----------|
| C(2)-O(1)-C(1)   | 116.9(3) |
| C(24)-O(3)-H(3O) | 106(3)   |
| C(5)-N(1)-C(11)  | 119.7(2) |
| C(5)-N(1)-C(8)   | 117.6(2) |
| C(11)-N(1)-C(8)  | 110.7(3) |
| C(13)-N(2)-C(14) | 124.9(3) |
| C(13)-N(2)-H(2N) | 116(3)   |
| C(14)-N(2)-H(2N) | 119(3)   |
| O(1)-C(1)-H(1A)  | 109.5    |
| O(1)-C(1)-H(1B)  | 109.5    |
| H(1A)-C(1)-H(1B) | 109.5    |
| O(1)-C(1)-H(1C)  | 109.5    |
| H(1A)-C(1)-H(1C) | 109.5    |
| H(1B)-C(1)-H(1C) | 109.5    |
| O(1)-C(2)-C(7)   | 124.0(3) |
| O(1)-C(2)-C(3)   | 116.2(3) |
| C(7)-C(2)-C(3)   | 119.8(3) |
| C(4)-C(3)-C(2)   | 120.9(3) |
| C(4)-C(3)-H(3)   | 119.5    |
| C(2)-C(3)-H(3)   | 119.5    |
| C(3)-C(4)-C(5)   | 119.4(3) |
| C(3)-C(4)-C(21)  | 118.1(3) |
| C(5)-C(4)-C(21)  | 122.5(3) |
| C(6)-C(5)-C(4)   | 119.4(3) |
| C(6)-C(5)-N(1)   | 118.0(3) |
| C(4)-C(5)-N(1)   | 122.6(3) |
| C(7)-C(6)-C(5)   | 120.2(3) |
| C(7)-C(6)-C(22)  | 119.0(3) |
| C(5)-C(6)-C(22)  | 120.7(3) |
| C(2)-C(7)-C(6)   | 120.1(3) |
| C(2)-C(7)-H(7)   | 120.0    |
| C(6)-C(7)-H(7)   | 120.0    |
| N(1)-C(8)-C(9)   | 104.9(3) |
| N(1)-C(8)-H(8A)  | 110.8    |

|                     |          |
|---------------------|----------|
| C(9)-C(8)-H(8A)     | 110.8    |
| N(1)-C(8)-H(8B)     | 110.8    |
| C(9)-C(8)-H(8B)     | 110.8    |
| H(8A)-C(8)-H(8B)    | 108.8    |
| C(8)-C(9)-C(10)     | 103.7(3) |
| C(8)-C(9)-H(9A)     | 111.0    |
| C(10)-C(9)-H(9A)    | 111.0    |
| C(8)-C(9)-H(9B)     | 111.0    |
| C(10)-C(9)-H(9B)    | 111.0    |
| H(9A)-C(9)-H(9B)    | 109.0    |
| C(9)-C(10)-C(11)    | 102.9(3) |
| C(9)-C(10)-H(10A)   | 111.2    |
| C(11)-C(10)-H(10A)  | 111.2    |
| C(9)-C(10)-H(10B)   | 111.2    |
| C(11)-C(10)-H(10B)  | 111.2    |
| H(10A)-C(10)-H(10B) | 109.1    |
| N(1)-C(11)-C(10)    | 101.9(3) |
| N(1)-C(11)-C(12)    | 112.3(3) |
| C(10)-C(11)-C(12)   | 113.6(3) |
| N(1)-C(11)-H(11)    | 109.6    |
| C(10)-C(11)-H(11)   | 109.6    |
| C(12)-C(11)-H(11)   | 109.6    |
| C(13)-C(12)-C(23)   | 109.1(3) |
| C(13)-C(12)-C(11)   | 108.8(3) |
| C(23)-C(12)-C(11)   | 112.9(3) |
| C(13)-C(12)-H(12)   | 108.7    |
| C(23)-C(12)-H(12)   | 108.7    |
| C(11)-C(12)-H(12)   | 108.7    |
| O(2)-C(13)-N(2)     | 123.9(3) |
| O(2)-C(13)-C(12)    | 121.3(3) |
| N(2)-C(13)-C(12)    | 114.8(3) |
| N(2)-C(14)-C(24)    | 109.3(3) |
| N(2)-C(14)-C(15)    | 112.4(3) |
| C(24)-C(14)-C(15)   | 109.8(3) |
| N(2)-C(14)-H(14)    | 108.4    |

|                     |          |
|---------------------|----------|
| C(24)-C(14)-H(14)   | 108.4    |
| C(15)-C(14)-H(14)   | 108.4    |
| C(16)-C(15)-C(20)   | 118.5(4) |
| C(16)-C(15)-C(14)   | 120.7(4) |
| C(20)-C(15)-C(14)   | 120.8(3) |
| C(15)-C(16)-C(17)   | 119.6(5) |
| C(15)-C(16)-H(16)   | 120.2    |
| C(17)-C(16)-H(16)   | 120.2    |
| C(18)-C(17)-C(16)   | 120.3(4) |
| C(18)-C(17)-H(17)   | 119.8    |
| C(16)-C(17)-H(17)   | 119.8    |
| C(19)-C(18)-C(17)   | 120.2(4) |
| C(19)-C(18)-H(18)   | 119.9    |
| C(17)-C(18)-H(18)   | 119.9    |
| C(18)-C(19)-C(20)   | 120.0(5) |
| C(18)-C(19)-H(19)   | 120.0    |
| C(20)-C(19)-H(19)   | 120.0    |
| C(15)-C(20)-C(19)   | 121.3(4) |
| C(15)-C(20)-H(20)   | 119.4    |
| C(19)-C(20)-H(20)   | 119.4    |
| C(4)-C(21)-H(21A)   | 109.5    |
| C(4)-C(21)-H(21B)   | 109.5    |
| H(21A)-C(21)-H(21B) | 109.5    |
| C(4)-C(21)-H(21C)   | 109.5    |
| H(21A)-C(21)-H(21C) | 109.5    |
| H(21B)-C(21)-H(21C) | 109.5    |
| C(6)-C(22)-H(22A)   | 109.5    |
| C(6)-C(22)-H(22B)   | 109.5    |
| H(22A)-C(22)-H(22B) | 109.5    |
| C(6)-C(22)-H(22C)   | 109.5    |
| H(22A)-C(22)-H(22C) | 109.5    |
| H(22B)-C(22)-H(22C) | 109.5    |
| C(12)-C(23)-H(23A)  | 109.5    |
| C(12)-C(23)-H(23B)  | 109.5    |
| H(23A)-C(23)-H(23B) | 109.5    |

|                     |          |
|---------------------|----------|
| C(12)-C(23)-H(23C)  | 109.5    |
| H(23A)-C(23)-H(23C) | 109.5    |
| H(23B)-C(23)-H(23C) | 109.5    |
| O(3)-C(24)-C(14)    | 109.1(3) |
| O(3)-C(24)-H(24A)   | 109.9    |
| C(14)-C(24)-H(24A)  | 109.9    |
| O(3)-C(24)-H(24B)   | 109.9    |
| C(14)-C(24)-H(24B)  | 109.9    |
| H(24A)-C(24)-H(24B) | 108.3    |
| O(1S)-C(1S)-H(1S1)  | 109.5    |
| O(1S)-C(1S)-H(1S2)  | 109.5    |
| H(1S1)-C(1S)-H(1S2) | 109.5    |
| O(1S)-C(1S)-H(1S3)  | 109.5    |
| H(1S1)-C(1S)-H(1S3) | 109.5    |
| H(1S2)-C(1S)-H(1S3) | 109.5    |
| C(1S)-O(1S)-H(1SO)  | 111(4)   |

---

Symmetry transformations used to generate equivalent atoms:

**Table SI-20.** Anisotropic displacement parameters ( $\text{\AA}^2 \times 10^3$ ) for  $\text{C}_{24}\text{H}_{32}\text{N}_2\text{O}_3(\text{CH}_3\text{OH})$ .  
 The anisotropic displacement factor exponent takes the form:  $-2\pi^2 [ h^2 a^* U_{11} + \dots + 2 h k a^* b^* U_{12} ]$

|       | U11   | U22   | U33   | U23   | U13   |
|-------|-------|-------|-------|-------|-------|
| O(1)  | 36(1) | 30(1) | 26(1) | -6(1) | -2(1) |
| O(2)  | 24(1) | 29(1) | 28(1) | 2(1)  | 6(1)  |
| O(3)  | 30(1) | 33(1) | 24(1) | 0(1)  | -5(1) |
| N(1)  | 25(1) | 25(1) | 21(1) | 2(1)  | 0(1)  |
| N(2)  | 22(1) | 25(1) | 22(1) | 0(1)  | 2(1)  |
| C(1)  | 39(2) | 37(2) | 25(2) | -3(2) | -6(2) |
| C(2)  | 30(2) | 25(2) | 18(2) | 1(1)  | 4(1)  |
| C(3)  | 31(2) | 25(2) | 22(2) | 2(1)  | 7(1)  |
| C(4)  | 24(2) | 26(2) | 22(2) | 6(1)  | 5(1)  |
| C(5)  | 23(2) | 22(1) | 20(2) | 4(1)  | 4(1)  |
| C(6)  | 26(2) | 23(1) | 28(2) | 1(1)  | 2(1)  |
| C(7)  | 23(2) | 29(2) | 31(2) | 4(1)  | -1(1) |
| C(8)  | 33(2) | 29(2) | 24(2) | 1(1)  | 2(2)  |
| C(9)  | 39(2) | 35(2) | 27(2) | 7(2)  | -6(2) |
| C(10) | 27(2) | 29(2) | 27(2) | 5(1)  | -6(1) |
| C(11) | 21(2) | 22(1) | 28(2) | 2(1)  | -2(1) |
| C(12) | 21(2) | 27(2) | 18(2) | 1(1)  | 0(1)  |
| C(13) | 26(2) | 26(2) | 14(1) | 4(1)  | -2(1) |
| C(14) | 24(2) | 26(2) | 26(2) | -2(1) | 4(1)  |
| C(15) | 45(2) | 28(2) | 24(2) | -2(1) | 6(2)  |
| C(16) | 56(3) | 36(2) | 37(2) | -6(2) | 17(2) |
| C(17) | 87(4) | 38(2) | 42(2) | -4(2) | 32(3) |
| C(18) | 91(4) | 43(2) | 31(2) | 8(2)  | -2(2) |
| C(19) | 74(3) | 58(3) | 41(2) | 21(2) | -9(2) |
| C(20) | 48(2) | 50(2) | 32(2) | 17(2) | -5(2) |
| C(21) | 27(2) | 30(2) | 37(2) | 2(2)  | -2(2) |
| C(22) | 27(2) | 29(2) | 50(2) | -9(2) | -6(2) |
| C(23) | 41(2) | 34(2) | 23(2) | 0(1)  | 1(2)  |
| C(24) | 27(2) | 28(2) | 22(2) | -2(1) | -2(1) |

|       |       |        |       |       |       |
|-------|-------|--------|-------|-------|-------|
| C(1S) | 41(2) | 54(2)  | 28(2) | 2(2)  | -6(2) |
| O(1S) | 36(2) | 116(3) | 26(1) | 11(2) | 0(1)  |

---



**Table SI-21.** Hydrogen coordinates (  $\times 10^4$ ) and isotropic displacement parameters ( $\text{\AA}^2 \times 10^3$ ) for  $\text{C}_{24}\text{H}_{32}\text{N}_2\text{O}_3(\text{CH}_3\text{OH})$ .

|        | x        | y        | z        | U(eq) |
|--------|----------|----------|----------|-------|
| H(3O)  | 1380(50) | 2170(30) | 4271(15) | 34    |
| H(2N)  | 3380(30) | 2900(30) | 5658(18) | 28    |
| H(1A)  | 8861     | 8546     | 7430     | 50    |
| H(1B)  | 8614     | 7501     | 7385     | 50    |
| H(1C)  | 9378     | 8033     | 6766     | 50    |
| H(3)   | 3979     | 8178     | 6357     | 31    |
| H(7)   | 8341     | 6745     | 6399     | 33    |
| H(8A)  | 4758     | 5593     | 4233     | 35    |
| H(8B)  | 3680     | 6461     | 4425     | 35    |
| H(9A)  | 2220     | 5092     | 3859     | 40    |
| H(9B)  | 1152     | 5758     | 4325     | 40    |
| H(10A) | 2687     | 4113     | 4722     | 33    |
| H(10B) | 766      | 4438     | 4882     | 33    |
| H(11)  | 1693     | 5481     | 5643     | 28    |
| H(12)  | 4301     | 4166     | 5876     | 27    |
| H(14)  | 44       | 2346     | 5845     | 30    |
| H(16)  | -810     | 1207     | 6582     | 52    |
| H(17)  | -153     | 166      | 7418     | 67    |
| H(18)  | 2664     | -136     | 7682     | 66    |
| H(19)  | 4850     | 519      | 7095     | 69    |
| H(20)  | 4237     | 1542     | 6267     | 52    |
| H(21A) | 1227     | 6907     | 5864     | 47    |
| H(21B) | 1896     | 7035     | 5119     | 47    |
| H(21C) | 1783     | 7863     | 5608     | 47    |
| H(22A) | 6806     | 5048     | 5317     | 53    |
| H(22B) | 8517     | 5622     | 5375     | 53    |
| H(22C) | 7837     | 5078     | 6003     | 53    |
| H(23A) | 4289     | 5353     | 6651     | 49    |
| H(23B) | 2343     | 5137     | 6837     | 49    |

|        |          |          |          |    |
|--------|----------|----------|----------|----|
| H(23C) | 3821     | 4447     | 7016     | 49 |
| H(24A) | 2706     | 1591     | 5042     | 31 |
| H(24B) | 846      | 1153     | 5113     | 31 |
| H(1S1) | 728      | 2210     | 2800     | 62 |
| H(1S2) | 2376     | 1702     | 2524     | 62 |
| H(1S3) | 2519     | 2715     | 2740     | 62 |
| H(1SO) | 3420(40) | 1710(40) | 3510(30) | 71 |

---

**Table SI-22.** Torsion angles [°] for C<sub>24</sub>H<sub>32</sub>N<sub>2</sub>O<sub>3</sub>(CH<sub>3</sub>OH).

---

|                        |           |
|------------------------|-----------|
| C(1)-O(1)-C(2)-C(7)    | -2.2(4)   |
| C(1)-O(1)-C(2)-C(3)    | 178.8(3)  |
| O(1)-C(2)-C(3)-C(4)    | -178.6(3) |
| C(7)-C(2)-C(3)-C(4)    | 2.3(5)    |
| C(2)-C(3)-C(4)-C(5)    | 0.5(5)    |
| C(2)-C(3)-C(4)-C(21)   | 179.5(3)  |
| C(3)-C(4)-C(5)-C(6)    | -3.7(5)   |
| C(21)-C(4)-C(5)-C(6)   | 177.4(3)  |
| C(3)-C(4)-C(5)-N(1)    | 177.3(3)  |
| C(21)-C(4)-C(5)-N(1)   | -1.7(5)   |
| C(11)-N(1)-C(5)-C(6)   | 114.7(3)  |
| C(8)-N(1)-C(5)-C(6)    | -106.1(3) |
| C(11)-N(1)-C(5)-C(4)   | -66.2(4)  |
| C(8)-N(1)-C(5)-C(4)    | 73.0(4)   |
| C(4)-C(5)-C(6)-C(7)    | 4.1(5)    |
| N(1)-C(5)-C(6)-C(7)    | -176.8(3) |
| C(4)-C(5)-C(6)-C(22)   | -177.5(3) |
| N(1)-C(5)-C(6)-C(22)   | 1.6(5)    |
| O(1)-C(2)-C(7)-C(6)    | 179.1(3)  |
| C(3)-C(2)-C(7)-C(6)    | -1.9(5)   |
| C(5)-C(6)-C(7)-C(2)    | -1.3(5)   |
| C(22)-C(6)-C(7)-C(2)   | -179.7(3) |
| C(5)-N(1)-C(8)-C(9)    | -144.3(3) |
| C(11)-N(1)-C(8)-C(9)   | -1.7(3)   |
| N(1)-C(8)-C(9)-C(10)   | -22.6(4)  |
| C(8)-C(9)-C(10)-C(11)  | 37.8(4)   |
| C(5)-N(1)-C(11)-C(10)  | 166.7(3)  |
| C(8)-N(1)-C(11)-C(10)  | 25.0(3)   |
| C(5)-N(1)-C(11)-C(12)  | -71.3(3)  |
| C(8)-N(1)-C(11)-C(12)  | 146.9(3)  |
| C(9)-C(10)-C(11)-N(1)  | -38.2(3)  |
| C(9)-C(10)-C(11)-C(12) | -159.2(3) |
| N(1)-C(11)-C(12)-C(13) | -160.5(3) |

C(10)-C(11)-C(12)-C(13)-45.6(4)  
N(1)-C(11)-C(12)-C(23) 78.2(3)  
C(10)-C(11)-C(12)-C(23)-166.8(3)  
C(14)-N(2)-C(13)-O(2) 3.2(5)  
C(14)-N(2)-C(13)-C(12) -175.6(3)  
C(23)-C(12)-C(13)-O(2) 51.7(4)  
C(11)-C(12)-C(13)-O(2) -71.9(4)  
C(23)-C(12)-C(13)-N(2) -129.4(3)  
C(11)-C(12)-C(13)-N(2) 107.0(3)  
C(13)-N(2)-C(14)-C(24) 135.8(3)  
C(13)-N(2)-C(14)-C(15) -102.0(4)  
N(2)-C(14)-C(15)-C(16) 137.3(3)  
C(24)-C(14)-C(15)-C(16)-100.8(4)  
N(2)-C(14)-C(15)-C(20) -45.0(5)  
C(24)-C(14)-C(15)-C(20) 76.9(4)  
C(20)-C(15)-C(16)-C(17) 1.3(5)  
C(14)-C(15)-C(16)-C(17) 179.1(3)  
C(15)-C(16)-C(17)-C(18) 0.3(6)  
C(16)-C(17)-C(18)-C(19) -1.8(7)  
C(17)-C(18)-C(19)-C(20) 1.6(8)  
C(16)-C(15)-C(20)-C(19) -1.5(6)  
C(14)-C(15)-C(20)-C(19)-179.2(4)  
C(18)-C(19)-C(20)-C(15) 0.0(7)  
N(2)-C(14)-C(24)-O(3) -65.8(3)  
C(15)-C(14)-C(24)-O(3) 170.5(3)

---

Symmetry transformations used to generate equivalent atoms:

**Table SI-23.** Hydrogen bonds for C<sub>24</sub>H<sub>32</sub>N<sub>2</sub>O<sub>3</sub>(CH<sub>3</sub>OH) [Å and °].

| D-H...A               | d(D-H)  | d(H...A) | d(D...A) | <(DHA) |
|-----------------------|---------|----------|----------|--------|
| O(3)-H(3O)...O(1S)    | 0.84(2) | 1.81(2)  | 2.656(4) | 176(4) |
| N(2)-H(2N)...O(3)#1   | 0.88(2) | 2.03(2)  | 2.903(4) | 170(4) |
| O(1S)-H(1SO)...O(2)#1 | 0.85(3) | 1.84(3)  | 2.669(4) | 168(6) |

Symmetry transformations used to generate equivalent atoms:

#1  $x+1/2, -y+1/2, -z+1$

## 10. Coordinates after optimization with M06-L/DF-def2-SVP<sub>DCM(IEFPCM)</sub>

33

iminium / electronic energy: -635.485731273 a.u. / lowest freq: 54.97 cm-1

|   |           |           |           |
|---|-----------|-----------|-----------|
| H | -4.280944 | 1.246655  | 0.144279  |
| C | -3.936282 | 0.286217  | 0.551150  |
| H | -4.644887 | -0.009994 | 1.331258  |
| C | -3.817817 | -0.741253 | -0.576945 |
| C | -2.39465  | -0.676214 | -0.937741 |
| C | -2.518176 | 0.421206  | 1.079821  |
| N | -1.687524 | -0.037129 | -0.064347 |
| H | -4.033748 | -1.776626 | -0.254397 |
| H | -4.471043 | -0.567655 | -1.442443 |
| H | -2.220158 | 1.434407  | 1.371343  |
| H | -2.285955 | -0.247939 | 1.923645  |
| H | -1.918058 | -1.115709 | -1.817480 |
| C | -0.116865 | -2.456168 | 0.150192  |
| C | 0.508419  | -1.099676 | 0.049178  |
| H | 2.50226   | -1.875579 | 0.176402  |
| C | 1.899822  | -0.972303 | 0.075781  |
| C | -0.25796  | 0.074055  | -0.061805 |
| C | 2.50452   | 0.287028  | -0.015302 |
| C | 0.322465  | 1.357096  | -0.146140 |
| O | 3.832047  | 0.486809  | -0.002259 |
| C | 1.709365  | 1.437142  | -0.129458 |
| C | -0.501033 | 2.600405  | -0.271456 |
| H | 2.205077  | 2.405919  | -0.214159 |
| H | -1.443575 | 2.436229  | -0.810627 |
| H | -0.756687 | 3.018090  | 0.714470  |
| H | 0.052465  | 3.382988  | -0.803177 |
| H | 0.574579  | -3.170649 | 0.610551  |
| H | -1.03719  | -2.456995 | 0.750503  |
| H | -0.375695 | -2.865215 | -0.838029 |
| C | 4.684045  | -0.635915 | 0.104437  |

|   |          |           |           |
|---|----------|-----------|-----------|
| H | 5.708394 | -0.252915 | 0.093834  |
| H | 4.515737 | -1.182990 | 1.044393  |
| H | 4.550604 | -1.326319 | -0.742135 |

72

Z\_enolate / electronic energy: -1993.66785348 a.u. / lowest freq: -21.17 cm-1

|   |           |           |           |
|---|-----------|-----------|-----------|
| C | 2.465444  | 2.799716  | 0.429421  |
| H | 4.100355  | 4.049430  | 1.105293  |
| C | 3.069137  | 4.016079  | 0.753885  |
| N | 1.205699  | 2.738916  | 0.000517  |
| C | 2.30642   | 5.176581  | 0.613810  |
| C | 0.473495  | 3.842852  | -0.134966 |
| H | 2.743964  | 6.145398  | 0.858359  |
| C | 0.985546  | 5.105100  | 0.165763  |
| H | 0.370091  | 5.997618  | 0.053741  |
| O | -1.788514 | 4.479719  | -0.747922 |
| C | -3.025451 | 3.804817  | -1.108844 |
| C | -0.883238 | 3.527329  | -0.614800 |
| N | -1.212853 | 2.316945  | -0.903987 |
| C | -2.600509 | 2.343122  | -1.376798 |
| H | -3.715091 | 3.907611  | -0.259053 |
| H | -3.4494   | 4.317880  | -1.978140 |
| H | -4.344773 | 0.609018  | -2.550152 |
| C | -4.307249 | 0.486124  | -1.464145 |
| H | -5.772983 | -1.096701 | -1.444425 |
| C | -5.107509 | -0.472789 | -0.843284 |
| C | -3.451635 | 1.293380  | -0.708155 |
| C | -5.050755 | -0.639071 | 0.540482  |
| C | -3.396546 | 1.117093  | 0.679739  |
| H | -5.672993 | -1.394068 | 1.027909  |
| C | -4.189548 | 0.154812  | 1.300178  |
| H | -2.714436 | 1.725667  | 1.279743  |
| H | -4.132378 | 0.021436  | 2.383275  |
| H | -2.588725 | 2.140411  | -2.461320 |

|    |           |           |           |
|----|-----------|-----------|-----------|
| H  | 5.333278  | -0.278219 | 0.222744  |
| H  | 4.382203  | -2.188735 | -3.773866 |
| H  | 3.282762  | -4.401987 | -3.462429 |
| C  | 3.886016  | -2.425528 | -2.830029 |
| C  | 3.267971  | -3.665285 | -2.656228 |
| H  | 4.351806  | -0.515408 | -1.947113 |
| C  | 3.870997  | -1.487618 | -1.800018 |
| O  | 4.256727  | 1.279920  | 1.062850  |
| C  | 4.527951  | -0.145635 | 0.959965  |
| C  | 2.631005  | -3.959584 | -1.451265 |
| H  | 2.148237  | -4.929701 | -1.310925 |
| C  | 3.059154  | 1.456385  | 0.526042  |
| C  | 3.238702  | -1.777975 | -0.584835 |
| C  | 2.613812  | -3.018016 | -0.421861 |
| H  | 4.881525  | -0.492753 | 1.936403  |
| N  | 2.398443  | 0.422606  | 0.140647  |
| C  | 3.182953  | -0.757032 | 0.521433  |
| H  | 2.103064  | -3.234962 | 0.522640  |
| H  | 2.659966  | -1.216146 | 1.380400  |
| Mg | 0.284551  | 0.784349  | -0.395727 |
| C  | 0.957721  | -1.146926 | 3.666367  |
| C  | 0.249752  | -1.897714 | 2.592832  |
| C  | -0.327284 | -1.278108 | 1.526456  |
| O  | -0.324849 | -0.009333 | 1.280021  |
| H  | -3.601927 | -2.893763 | -0.316092 |
| C  | -2.62023  | -3.352507 | -0.515758 |
| H  | -2.766754 | -4.338781 | -0.970736 |
| O  | -1.920686 | -2.520560 | -1.450322 |
| C  | -1.101551 | -1.720043 | -0.762366 |
| C  | -1.732148 | -3.382844 | 0.733566  |
| N  | -1.033606 | -2.079268 | 0.535013  |
| O  | -0.505965 | -0.804381 | -1.345061 |
| C  | -2.570376 | -3.422222 | 1.995330  |



|   |           |           |           |
|---|-----------|-----------|-----------|
| C | -0.752807 | -4.548939 | 0.646362  |
| H | -3.200146 | -2.526624 | 2.079284  |
| H | -3.229382 | -4.301141 | 1.964803  |
| H | -1.957074 | -3.498435 | 2.900374  |
| H | -0.211642 | -4.533671 | -0.310051 |
| H | -0.014667 | -4.540974 | 1.457190  |
| H | -1.300673 | -5.499351 | 0.706088  |
| H | 0.408215  | -1.132330 | 4.624473  |
| H | 1.943851  | -1.582705 | 3.898423  |
| H | 1.120434  | -0.099664 | 3.374699  |
| H | 0.175759  | -2.981181 | 2.685641  |

72

E\_enolate / electronic energy: -1993.65747922 a.u. / lowest freq: 20.48 cm-1

|   |           |          |           |
|---|-----------|----------|-----------|
| C | -3.312798 | 2.056740 | -0.529501 |
| H | -5.284118 | 2.867472 | -0.910040 |
| C | -4.246638 | 3.085904 | -0.657174 |
| N | -2.040896 | 2.300879 | -0.218219 |
| C | -3.804034 | 4.392712 | -0.444523 |
| C | -1.618476 | 3.542999 | 0.006600  |
| H | -4.503607 | 5.224328 | -0.538149 |
| C | -2.473782 | 4.640222 | -0.100353 |
| H | -2.108872 | 5.650237 | 0.085436  |
| O | 0.371298  | 4.699983 | 0.760889  |
| C | 1.757112  | 4.367927 | 1.044332  |
| C | -0.203219 | 3.562285 | 0.412566  |
| N | 0.478888  | 2.472663 | 0.489009  |
| C | 1.771649  | 2.824154 | 1.082952  |
| H | 2.369278  | 4.781920 | 0.230057  |
| H | 2.037632  | 4.849976 | 1.986455  |
| H | 4.17131   | 2.278005 | 2.198175  |
| C | 4.151464  | 2.034149 | 1.131933  |
| H | 6.217607  | 1.418643 | 1.086080  |
| C | 5.300469  | 1.550971 | 0.507729  |

|    |           |           |           |
|----|-----------|-----------|-----------|
| C  | 2.96852   | 2.212885  | 0.404141  |
| C  | 5.27495   | 1.230297  | -0.850375 |
| C  | 2.948033  | 1.886575  | -0.955508 |
| H  | 6.172898  | 0.847118  | -1.340715 |
| C  | 4.095579  | 1.394762  | -1.577453 |
| H  | 2.026088  | 2.008724  | -1.528171 |
| H  | 4.066727  | 1.138915  | -2.639339 |
| H  | 1.75249   | 2.470592  | 2.129984  |
| H  | -5.275157 | -1.644300 | -0.055809 |
| H  | -2.950414 | -2.705760 | 3.805470  |
| H  | -1.618612 | -4.760189 | 3.349164  |
| C  | -2.693387 | -2.974206 | 2.778380  |
| C  | -1.946701 | -4.126322 | 2.522340  |
| H  | -3.678355 | -1.252297 | 1.934975  |
| C  | -3.106425 | -2.161953 | 1.725037  |
| O  | -4.769111 | 0.156054  | -0.941228 |
| C  | -4.666425 | -1.294768 | -0.901452 |
| C  | -1.625696 | -4.466482 | 1.208761  |
| H  | -1.045725 | -5.369239 | 1.000706  |
| C  | -3.558503 | 0.612164  | -0.672843 |
| C  | -2.777581 | -2.491027 | 0.404369  |
| C  | -2.041502 | -3.651416 | 0.155653  |
| H  | -5.090762 | -1.687444 | -1.831497 |
| N  | -2.598751 | -0.230437 | -0.519698 |
| C  | -3.156293 | -1.571626 | -0.729239 |
| H  | -1.785335 | -3.909436 | -0.874649 |
| H  | -2.71861  | -1.972080 | -1.659998 |
| Mg | -0.614129 | 0.631407  | -0.099188 |
| C  | 0.482175  | -3.920167 | -2.325515 |
| C  | 0.329502  | -2.440023 | -2.355999 |
| C  | 0.704748  | -1.513723 | -1.435743 |
| O  | 0.430927  | -0.244177 | -1.490555 |
| H  | 4.02575   | -0.907668 | 0.588706  |

|   |           |           |           |
|---|-----------|-----------|-----------|
| C | 3.463201  | -1.789868 | 0.935932  |
| H | 4.107436  | -2.400149 | 1.578441  |
| O | 2.352287  | -1.325407 | 1.717626  |
| C | 1.298784  | -1.231021 | 0.902677  |
| C | 2.83318   | -2.572255 | -0.223203 |
| N | 1.498272  | -1.886543 | -0.259656 |
| O | 0.299743  | -0.587785 | 1.246019  |
| C | 3.597915  | -2.380812 | -1.515294 |
| C | 2.716751  | -4.040830 | 0.168912  |
| H | 3.640389  | -1.319844 | -1.796411 |
| H | 4.628088  | -2.743769 | -1.393674 |
| H | 3.142099  | -2.940237 | -2.341611 |
| H | 2.099013  | -4.163301 | 1.070005  |
| H | 2.29559   | -4.659894 | -0.628083 |
| H | 3.717622  | -4.435127 | 0.393115  |
| H | -0.341334 | -4.401573 | -2.874424 |
| H | 1.407028  | -4.301351 | -2.798052 |
| H | 0.454831  | -4.326934 | -1.304641 |
| H | -0.180595 | -2.006970 | -3.222121 |

105

ts\_IX' / electronic energy: -2629.17482358 a.u. / lowest freq: -268.09 cm-1

|   |           |          |           |
|---|-----------|----------|-----------|
| H | 3.012617  | 5.144450 | -1.340197 |
| H | -1.358056 | 5.710499 | -2.612245 |
| H | -1.52763  | 5.927383 | -0.852536 |
| O | 0.263329  | 5.102259 | -1.485753 |
| C | -1.175437 | 5.246202 | -1.636614 |
| C | 3.049742  | 4.055704 | -1.307709 |
| C | 4.262707  | 3.363916 | -1.298858 |
| C | 0.494273  | 3.810149 | -1.369921 |
| C | 1.874986  | 3.303264 | -1.289400 |
| H | -1.653593 | 4.779959 | 1.053285  |
| C | -1.725811 | 3.807319 | -1.524035 |
| H | -2.207411 | 3.506476 | -2.468264 |

|    |           |           |           |
|----|-----------|-----------|-----------|
| C  | -2.52564  | 4.147442  | 0.859700  |
| N  | -0.505956 | 2.996970  | -1.374010 |
| C  | -2.70632  | 3.563542  | -0.400239 |
| N  | 1.898109  | 1.972273  | -1.243999 |
| C  | -3.459911 | 3.945873  | 1.873781  |
| C  | 3.052091  | 1.307622  | -1.238182 |
| C  | -3.817319 | 2.740387  | -0.612022 |
| H  | -3.96427  | 2.276607  | -1.592615 |
| C  | -4.57828  | 3.143145  | 1.645184  |
| C  | -4.748389 | 2.529028  | 0.405009  |
| Mg | 0.018787  | 0.885577  | -1.196936 |
| H  | -5.313129 | 2.989539  | 2.438585  |
| C  | 2.831109  | -0.146948 | -1.204365 |
| H  | -5.619386 | 1.895673  | 0.221577  |
| O  | -1.140874 | 0.338903  | 0.292869  |
| N  | 1.640077  | -0.635861 | -1.148558 |
| O  | -1.258747 | -0.225754 | -2.300052 |
| C  | -2.035203 | -0.524510 | 0.497325  |
| H  | 1.509036  | -1.550173 | -3.756942 |
| C  | -2.06492  | -1.057690 | -1.894593 |
| C  | 3.297463  | -2.312507 | -1.270890 |
| C  | 1.77656   | -2.095850 | -1.091726 |
| H  | 3.560216  | -2.764802 | -2.237154 |
| H  | -5.016893 | -0.719873 | -1.260371 |
| N  | -2.441061 | -1.339714 | -0.600248 |
| C  | 0.931303  | -2.427381 | -3.449135 |
| H  | -4.977841 | -0.962879 | 0.500315  |
| O  | -2.726691 | -1.808041 | -2.758692 |
| C  | 0.932074  | -2.823802 | -2.106043 |
| C  | -4.917993 | -1.475124 | -0.467560 |
| H  | 0.197768  | -2.816344 | -5.437787 |
| C  | 0.197215  | -3.138715 | -4.394428 |
| C  | -3.627111 | -2.267887 | -0.624597 |

|   |           |           |           |
|---|-----------|-----------|-----------|
| C | -3.489326 | -2.792727 | -2.058681 |
| H | -5.777283 | -2.154582 | -0.541844 |
| H | -4.453562 | -2.911489 | -2.565224 |
| C | 0.189459  | -3.946385 | -1.727480 |
| H | -3.872791 | -3.213611 | 1.348958  |
| H | 0.189507  | -4.268430 | -0.681226 |
| C | -3.528118 | -3.442900 | 0.335235  |
| C | -0.533887 | -4.264838 | -4.011033 |
| H | -2.937381 | -3.742562 | -2.108254 |
| H | -2.504764 | -3.839993 | 0.383067  |
| C | -0.533535 | -4.670154 | -2.677239 |
| H | -1.103575 | -4.826574 | -4.754436 |
| H | -4.176342 | -4.250299 | -0.032515 |
| H | -1.099026 | -5.553721 | -2.371177 |
| H | -3.314356 | 4.419021  | 2.847387  |
| H | 5.201897  | 3.917874  | -1.320427 |
| C | 4.28048   | 1.968319  | -1.275561 |
| H | 5.214302  | 1.407453  | -1.283647 |
| O | 3.859561  | -0.974952 | -1.247189 |
| H | 3.765744  | -2.893040 | -0.466656 |
| H | 1.461235  | -2.417684 | -0.084578 |
| C | -2.564608 | 0.413380  | 2.741690  |
| C | -2.575212 | -0.728879 | 1.778699  |
| H | -1.670257 | 0.438019  | 3.382330  |
| H | -2.578611 | 1.381283  | 2.221298  |
| H | -3.438888 | 0.377783  | 3.404986  |
| H | -3.382096 | -1.449844 | 1.883141  |
| H | -2.256492 | -1.315356 | 4.874574  |
| C | -1.401567 | -2.000933 | 4.796254  |
| H | -1.394024 | -2.608387 | 5.708594  |
| C | -1.508215 | -2.837718 | 3.524048  |
| C | -0.80048  | -1.993483 | 2.514298  |
| C | -0.106269 | -1.226480 | 4.610636  |

|   |           |           |          |
|---|-----------|-----------|----------|
| N | 0.075343  | -1.190294 | 3.142445 |
| H | -0.939308 | -3.781174 | 3.619931 |
| H | -2.53082  | -3.122438 | 3.253243 |
| H | -0.121916 | -0.210723 | 5.031225 |
| H | 0.765521  | -1.740355 | 5.052044 |
| H | -0.538149 | -2.347543 | 1.514111 |
| C | 2.056593  | -3.191382 | 2.645251 |
| C | 2.327157  | -1.738383 | 2.399025 |
| H | 4.366247  | -2.108245 | 1.829878 |
| C | 3.5998    | -1.344326 | 1.969166 |
| C | 1.335527  | -0.757682 | 2.604338 |
| C | 3.891231  | 0.006700  | 1.761021 |
| C | 1.624644  | 0.613386  | 2.428612 |
| O | 5.0858    | 0.470381  | 1.340935 |
| C | 2.899177  | 0.968103  | 1.989352 |
| C | 0.624811  | 1.690269  | 2.698453 |
| H | 3.152178  | 2.021383  | 1.842885 |
| H | 0.232304  | 1.642166  | 3.724756 |
| H | 1.075551  | 2.682455  | 2.569736 |
| H | -0.240413 | 1.613240  | 2.025500 |
| H | 2.985898  | -3.772604 | 2.642963 |
| H | 1.562002  | -3.365801 | 3.611114 |
| H | 1.401736  | -3.638304 | 1.880017 |
| C | 6.1401    | -0.452851 | 1.153613 |
| H | 7.012897  | 0.129307  | 0.842402 |
| H | 6.380253  | -0.985088 | 2.086359 |
| H | 5.901596  | -1.186898 | 0.368447 |

105

ts\_X' / electronic energy: -2629.16434168 a.u. / lowest freq: -334.36 cm-1

|   |          |          |           |
|---|----------|----------|-----------|
| C | 3.434359 | 1.225466 | -1.323674 |
| H | 5.594297 | 1.338844 | -1.364001 |
| C | 4.65842  | 1.894172 | -1.303235 |
| N | 2.275243 | 1.878243 | -1.246726 |

|   |           |           |           |
|---|-----------|-----------|-----------|
| C | 4.636574  | 3.284675  | -1.191081 |
| C | 2.250028  | 3.205875  | -1.138380 |
| H | 5.57312   | 3.842988  | -1.167229 |
| C | 3.420106  | 3.964837  | -1.104424 |
| H | 3.376504  | 5.049805  | -1.010191 |
| O | 0.634924  | 5.008722  | -1.098767 |
| C | -0.806786 | 5.159119  | -0.997180 |
| C | 0.869733  | 3.710984  | -1.069205 |
| N | -0.130354 | 2.898757  | -1.028102 |
| C | -1.350417 | 3.721348  | -1.120650 |
| H | -1.023159 | 5.630253  | -0.028198 |
| H | -1.132473 | 5.831537  | -1.797171 |
| H | -3.805308 | 2.652942  | -1.588040 |
| C | -3.610003 | 2.775627  | -0.517947 |
| H | -5.531237 | 1.992167  | 0.087588  |
| C | -4.573708 | 2.401332  | 0.419601  |
| C | -2.395894 | 3.334974  | -0.104390 |
| C | -4.326239 | 2.565555  | 1.782217  |
| C | -2.169754 | 3.522878  | 1.264555  |
| H | -5.079022 | 2.268316  | 2.515895  |
| C | -3.121513 | 3.130142  | 2.203424  |
| H | -1.234694 | 3.977348  | 1.604944  |
| H | -2.924884 | 3.273161  | 3.268755  |
| H | -1.772523 | 3.552705  | -2.125906 |
| H | 3.793982  | -2.715448 | -2.617551 |
| H | -0.677961 | -2.645364 | -4.956673 |
| H | -1.464883 | -4.885075 | -4.198812 |
| C | -0.289193 | -3.079473 | -4.032536 |
| C | -0.727702 | -4.334810 | -3.609856 |
| H | 0.995149  | -1.394950 | -3.617299 |
| C | 0.64972   | -2.376112 | -3.278916 |
| O | 4.234115  | -1.076242 | -1.427506 |
| C | 3.629338  | -2.393714 | -1.578797 |

|    |           |           |           |
|----|-----------|-----------|-----------|
| C  | -0.221808 | -4.882978 | -2.431015 |
| H  | -0.559719 | -5.865557 | -2.093749 |
| C  | 3.219545  | -0.228532 | -1.385423 |
| C  | 1.150236  | -2.911980 | -2.087126 |
| C  | 0.709653  | -4.173744 | -1.674363 |
| H  | 4.14213   | -3.083490 | -0.899855 |
| N  | 2.025029  | -0.702992 | -1.357587 |
| C  | 2.143619  | -2.155298 | -1.246326 |
| H  | 1.092944  | -4.599482 | -0.742255 |
| H  | 1.95315   | -2.405490 | -0.183896 |
| Mg | 0.360208  | 0.740604  | -1.231396 |
| C  | -0.965441 | -3.209999 | 1.264986  |
| C  | -1.977174 | -2.176809 | 0.910809  |
| C  | -1.688817 | -1.209387 | -0.070874 |
| O  | -0.561585 | -0.653985 | -0.154870 |
| H  | -5.20592  | 0.439613  | -1.698787 |
| C  | -4.636183 | -0.382930 | -2.156928 |
| H  | -5.263909 | -0.870667 | -2.910593 |
| O  | -3.494247 | 0.179036  | -2.808073 |
| C  | -2.430412 | 0.046827  | -2.026595 |
| C  | -4.079802 | -1.357930 | -1.112941 |
| N  | -2.714864 | -0.747383 | -0.940708 |
| O  | -1.374729 | 0.589674  | -2.334515 |
| C  | -4.959416 | -1.305105 | 0.128669  |
| C  | -3.952914 | -2.760770 | -1.690993 |
| H  | -4.773968 | -0.396240 | 0.717504  |
| H  | -6.012204 | -1.288603 | -0.186429 |
| H  | -4.84992  | -2.178231 | 0.780646  |
| H  | -3.431359 | -2.748071 | -2.658189 |
| H  | -3.405016 | -3.432060 | -1.017314 |
| H  | -4.952025 | -3.187476 | -1.850258 |
| H  | -1.073919 | -3.539275 | 2.309237  |
| H  | -1.084038 | -4.115392 | 0.646406  |



|   |           |           |          |
|---|-----------|-----------|----------|
| H | 0.058457  | -2.840259 | 1.119972 |
| H | -3.010278 | -2.512090 | 0.984797 |
| H | -1.879284 | -0.139193 | 5.435576 |
| C | -2.016049 | -1.122960 | 4.962153 |
| H | -2.580307 | -1.749949 | 5.662744 |
| C | -2.695589 | -0.966363 | 3.603387 |
| C | -1.544908 | -0.753693 | 2.665200 |
| C | -0.665226 | -1.712847 | 4.601331 |
| N | -0.396307 | -1.108867 | 3.276417 |
| H | -3.249104 | -1.879820 | 3.334698 |
| H | -3.419595 | -0.141586 | 3.551959 |
| H | 0.145557  | -1.444647 | 5.291254 |
| H | -0.700966 | -2.812021 | 4.538693 |
| H | -1.505268 | 0.049748  | 1.933265 |
| C | 1.744584  | -3.158442 | 3.392946 |
| C | 1.938525  | -1.780613 | 2.840087 |
| H | 3.983155  | -2.227191 | 2.362790 |
| C | 3.212827  | -1.454363 | 2.352386 |
| C | 0.924836  | -0.797716 | 2.826726 |
| C | 3.499996  | -0.171250 | 1.886662 |
| C | 1.231071  | 0.527422  | 2.427253 |
| O | 4.697008  | 0.214386  | 1.390706 |
| C | 2.507087  | 0.811752  | 1.949963 |
| C | 0.264243  | 1.658807  | 2.555991 |
| H | 2.768348  | 1.836217  | 1.672709 |
| H | -0.417046 | 1.733091  | 1.694943 |
| H | -0.374211 | 1.571437  | 3.447163 |
| H | 0.797358  | 2.616452  | 2.617477 |
| H | 1.779315  | -3.156140 | 4.493019 |
| H | 0.787612  | -3.608180 | 3.109620 |
| H | 2.543466  | -3.829750 | 3.056177 |
| C | 5.773308  | -0.698686 | 1.450399 |
| H | 6.642019  | -0.188213 | 1.022803 |

|   |          |           |          |
|---|----------|-----------|----------|
| H | 5.999189 | -0.983795 | 2.489292 |
| H | 5.573684 | -1.608906 | 0.865031 |

105

ts\_IX / electronic energy: -2629.16102555 a.u. / lowest freq: -270.98 cm-1

|    |           |           |           |
|----|-----------|-----------|-----------|
| H  | 4.596338  | -4.722589 | -2.281451 |
| H  | 4.433831  | -4.581214 | 2.318413  |
| H  | 2.845729  | -5.305109 | 1.954665  |
| O  | 3.825532  | -4.443927 | 0.346972  |
| C  | 3.499016  | -4.443860 | 1.763982  |
| C  | 4.23251   | -3.722777 | -2.517525 |
| C  | 4.392236  | -3.166157 | -3.787981 |
| C  | 3.383433  | -3.298860 | -0.131976 |
| C  | 3.596885  | -2.948598 | -1.546590 |
| H  | 0.704165  | -4.648905 | 1.255787  |
| C  | 2.821608  | -3.075971 | 2.007999  |
| H  | 3.454372  | -2.440070 | 2.648671  |
| C  | 0.474138  | -4.015080 | 2.118291  |
| N  | 2.805651  | -2.470631 | 0.668189  |
| C  | 1.443924  | -3.138159 | 2.621164  |
| N  | 3.14404   | -1.724773 | -1.813393 |
| C  | -0.78043  | -4.099264 | 2.716808  |
| C  | 3.314758  | -1.179882 | -3.016373 |
| C  | 1.122999  | -2.322606 | 3.710159  |
| H  | 1.875565  | -1.632805 | 4.104037  |
| C  | -1.084329 | -3.298365 | 3.819472  |
| C  | -0.134966 | -2.402304 | 4.308761  |
| Mg | 2.144998  | -0.588735 | -0.233675 |
| H  | -2.065477 | -3.370908 | 4.293932  |
| C  | 2.808947  | 0.202304  | -3.054622 |
| H  | -0.368889 | -1.772261 | 5.170042  |
| O  | 0.300196  | -0.250976 | 0.394094  |
| N  | 2.249345  | 0.731789  | -2.020742 |
| O  | 2.639702  | 0.662975  | 1.263643  |

|   |           |           |           |
|---|-----------|-----------|-----------|
| C | -0.271624 | 0.502418  | 1.234501  |
| H | 4.09302   | 2.142714  | -0.819370 |
| C | 1.904075  | 1.409722  | 1.902166  |
| C | 2.50183   | 2.267947  | -3.791280 |
| C | 1.855112  | 2.093337  | -2.398478 |
| H | 3.387461  | 2.918469  | -3.777863 |
| H | 0.643639  | 0.929020  | 4.573250  |
| N | 0.53044   | 1.484881  | 1.900076  |
| C | 3.451355  | 3.014045  | -0.664581 |
| H | -1.066919 | 0.846803  | 4.094795  |
| O | 2.432389  | 2.270088  | 2.758250  |
| C | 2.256332  | 3.134107  | -1.383012 |
| C | -0.225479 | 1.528415  | 4.267944  |
| H | 4.748095  | 3.869701  | 0.828585  |
| C | 3.82061   | 3.985555  | 0.263779  |
| C | 0.098962  | 2.371524  | 3.041809  |
| C | 1.408941  | 3.137979  | 3.246603  |
| H | -0.490682 | 2.184903  | 5.107124  |
| H | 1.614253  | 3.366544  | 4.297996  |
| C | 1.449157  | 4.258210  | -1.170378 |
| H | -1.99504  | 2.939037  | 2.650823  |
| H | 0.522316  | 4.375332  | -1.739028 |
| C | -0.989204 | 3.370539  | 2.699454  |
| C | 3.004627  | 5.096647  | 0.477733  |
| H | 1.446521  | 4.067857  | 2.657876  |
| H | -0.767918 | 3.890328  | 1.757662  |
| C | 1.819323  | 5.233984  | -0.245558 |
| H | 3.293594  | 5.857147  | 1.206732  |
| H | -1.016856 | 4.132907  | 3.490300  |
| H | 1.178492  | 6.105076  | -0.090204 |
| H | -1.52522  | -4.794140 | 2.322708  |
| H | 4.884252  | -3.740396 | -4.573861 |
| C | 3.941442  | -1.871667 | -4.053170 |

|   |           |           |           |
|---|-----------|-----------|-----------|
| H | 4.07575   | -1.408515 | -5.030554 |
| O | 2.950242  | 0.931309  | -4.144454 |
| H | 1.814327  | 2.613208  | -4.570061 |
| H | 0.755029  | 2.107309  | -2.492084 |
| C | -2.334774 | -0.889924 | 1.251468  |
| C | -1.6561   | 0.430990  | 1.451761  |
| H | -3.425875 | -0.796413 | 1.307031  |
| H | -2.088409 | -1.352853 | 0.283605  |
| H | -2.037024 | -1.616325 | 2.024646  |
| H | -2.094291 | 1.083770  | 2.205311  |
| H | -2.678207 | 3.812520  | 0.630169  |
| C | -2.677361 | 3.604283  | -0.448598 |
| H | -2.573425 | 4.565653  | -0.965477 |
| C | -1.577294 | 2.607193  | -0.798714 |
| C | -2.237627 | 1.287086  | -0.602241 |
| C | -3.946861 | 2.865545  | -0.827585 |
| N | -3.560048 | 1.448307  | -0.715791 |
| H | -1.316808 | 2.682751  | -1.871088 |
| H | -0.639242 | 2.727207  | -0.239485 |
| H | -4.809587 | 3.093355  | -0.188055 |
| H | -4.25781  | 3.049553  | -1.870781 |
| H | -1.78271  | 0.345479  | -0.918555 |
| C | -3.415273 | -0.186501 | -3.108479 |
| C | -4.474991 | -0.377168 | -2.068139 |
| H | -5.41107  | -1.979728 | -3.147561 |
| C | -5.446275 | -1.370077 | -2.243669 |
| C | -4.524219 | 0.414202  | -0.907599 |
| C | -6.449411 | -1.563573 | -1.288419 |
| C | -5.531625 | 0.236284  | 0.064665  |
| O | -7.419669 | -2.494266 | -1.387521 |
| C | -6.48093  | -0.758783 | -0.141476 |
| C | -5.576742 | 1.067864  | 1.309198  |
| H | -7.265429 | -0.935783 | 0.597240  |

|   |           |           |           |
|---|-----------|-----------|-----------|
| H | -6.227324 | 1.948100  | 1.188046  |
| H | -5.985728 | 0.495963  | 2.151585  |
| H | -4.584376 | 1.439239  | 1.601557  |
| H | -3.740701 | -0.577853 | -4.079676 |
| H | -3.147236 | 0.870415  | -3.247348 |
| H | -2.486792 | -0.720714 | -2.850428 |
| C | -7.43661  | -3.326421 | -2.526452 |
| H | -8.290299 | -4.000844 | -2.410842 |
| H | -7.564551 | -2.745626 | -3.453216 |
| H | -6.516538 | -3.926209 | -2.606706 |

105

ts\_X / electronic energy: -2629.16030608 a.u. / lowest freq: -275.30 cm-1

|   |           |           |           |
|---|-----------|-----------|-----------|
| C | -3.364947 | -2.783626 | -2.062207 |
| H | -4.068522 | -4.512164 | -3.159769 |
| C | -4.119922 | -3.429888 | -3.041333 |
| N | -3.417693 | -1.463102 | -1.894112 |
| C | -4.944019 | -2.643239 | -3.848501 |
| C | -4.219183 | -0.711625 | -2.646081 |
| H | -5.548507 | -3.111711 | -4.626045 |
| C | -5.010584 | -1.262293 | -3.654755 |
| H | -5.660739 | -0.629873 | -4.259086 |
| O | -5.048237 | 1.563674  | -2.714741 |
| C | -4.758183 | 2.830307  | -2.062360 |
| C | -4.19157  | 0.695334  | -2.211981 |
| N | -3.396629 | 1.079637  | -1.273704 |
| C | -3.791428 | 2.454066  | -0.923482 |
| H | -4.312742 | 3.496249  | -2.815165 |
| H | -5.705955 | 3.261219  | -1.725014 |
| H | -3.003462 | 3.606080  | 1.397538  |
| C | -2.377096 | 3.917996  | 0.555763  |
| H | -1.17886  | 5.264268  | 1.746680  |
| C | -1.355922 | 4.849089  | 0.751580  |
| C | -2.636328 | 3.401426  | -0.719256 |

|    |           |           |           |
|----|-----------|-----------|-----------|
| C  | -0.584442 | 5.275665  | -0.328685 |
| C  | -1.837452 | 3.815494  | -1.792952 |
| H  | 0.201401  | 6.020001  | -0.181005 |
| C  | -0.823455 | 4.751748  | -1.600159 |
| H  | -2.017798 | 3.415869  | -2.795584 |
| H  | -0.217126 | 5.077182  | -2.448853 |
| H  | -4.338081 | 2.383408  | 0.033184  |
| H  | -2.086175 | -5.473937 | 0.845902  |
| H  | -3.081257 | -2.192467 | 4.506972  |
| H  | -1.113222 | -2.818438 | 5.902343  |
| C  | -2.188448 | -2.614011 | 4.039105  |
| C  | -1.087404 | -2.965011 | 4.820246  |
| H  | -3.02967  | -2.541175 | 2.054230  |
| C  | -2.156933 | -2.805431 | 2.657852  |
| O  | -2.266171 | -4.712273 | -1.070117 |
| C  | -1.445931 | -4.976094 | 0.103702  |
| C  | 0.049237  | -3.499569 | 4.212783  |
| H  | 0.916148  | -3.775055 | 4.817392  |
| C  | -2.461758 | -3.407226 | -1.080538 |
| C  | -1.018702 | -3.335042 | 2.039623  |
| C  | 0.084585  | -3.677780 | 2.830807  |
| H  | -0.639652 | -5.655288 | -0.190406 |
| N  | -1.84778  | -2.683296 | -0.211194 |
| C  | -0.974601 | -3.574995 | 0.552021  |
| H  | 0.979336  | -4.094763 | 2.358984  |
| H  | 0.059859  | -3.395620 | 0.206275  |
| Mg | -2.191379 | -0.508522 | -0.311282 |
| C  | 2.323875  | -1.261135 | 0.675198  |
| C  | 1.748723  | -0.006730 | 1.260914  |
| C  | 0.368045  | 0.213731  | 1.150382  |
| O  | -0.286824 | -0.195813 | 0.148775  |
| H  | -1.060243 | 3.320220  | 3.600450  |
| C  | -1.03451  | 2.264948  | 3.910999  |

|   |           |           |           |
|---|-----------|-----------|-----------|
| H | -1.158597 | 2.210825  | 4.997892  |
| O | -2.134017 | 1.592799  | 3.293108  |
| C | -1.708507 | 0.949918  | 2.214582  |
| C | 0.218564  | 1.538056  | 3.410010  |
| N | -0.337831 | 0.986094  | 2.124662  |
| O | -2.522958 | 0.405313  | 1.475194  |
| C | 1.326087  | 2.557411  | 3.224821  |
| C | 0.591571  | 0.404001  | 4.355792  |
| H | 1.047957  | 3.307510  | 2.472046  |
| H | 1.471942  | 3.087414  | 4.176235  |
| H | 2.294735  | 2.121073  | 2.957380  |
| H | -0.272156 | -0.247438 | 4.550399  |
| H | 1.401414  | -0.221548 | 3.962362  |
| H | 0.924949  | 0.819450  | 5.315878  |
| H | 3.418284  | -1.218250 | 0.612265  |
| H | 2.079454  | -2.141629 | 1.293744  |
| H | 1.941067  | -1.471394 | -0.334965 |
| H | 2.261691  | 0.377269  | 2.141347  |
| H | 2.554037  | 4.604752  | -0.331730 |
| C | 2.681013  | 3.573212  | 0.017784  |
| H | 2.728783  | 3.608302  | 1.114964  |
| C | 1.562811  | 2.642274  | -0.442698 |
| C | 2.237087  | 1.319293  | -0.553794 |
| C | 3.938114  | 2.923151  | -0.532907 |
| N | 3.551578  | 1.511772  | -0.697294 |
| H | 0.662987  | 2.645788  | 0.188937  |
| H | 1.21655   | 2.911579  | -1.457456 |
| H | 4.226156  | 3.312327  | -1.524808 |
| H | 4.816799  | 3.019977  | 0.118631  |
| H | 1.763082  | 0.466574  | -1.043234 |
| C | 5.678349  | 0.701058  | 1.077721  |
| C | 5.541799  | 0.150607  | -0.307852 |
| H | 7.268503  | -1.108408 | -0.101124 |

|   |          |           |           |
|---|----------|-----------|-----------|
| C | 6.463118 | -0.796832 | -0.767751 |
| C | 4.491532 | 0.539967  | -1.155906 |
| C | 6.342666 | -1.342545 | -2.049852 |
| C | 4.359923 | 0.008460  | -2.457476 |
| O | 7.184918 | -2.260769 | -2.564548 |
| C | 5.291755 | -0.933816 | -2.881966 |
| C | 3.253218 | 0.430251  | -3.372737 |
| H | 5.225386 | -1.362813 | -3.884005 |
| H | 2.317599 | -0.112388 | -3.164043 |
| H | 3.025205 | 1.501922  | -3.287790 |
| H | 3.507494 | 0.224590  | -4.419096 |
| H | 6.337648 | 1.583021  | 1.102022  |
| H | 4.713632 | 1.008793  | 1.504019  |
| H | 6.126206 | -0.037528 | 1.754365  |
| C | 8.264495 | -2.698958 | -1.768901 |
| H | 8.821158 | -3.426714 | -2.366871 |
| H | 8.935978 | -1.868384 | -1.501249 |
| H | 7.917228 | -3.187308 | -0.844956 |

105

ts\_XI / electronic energy: -2629.16825040 a.u. / lowest freq: -275.91 cm-1

|   |           |           |           |
|---|-----------|-----------|-----------|
| C | -3.038962 | -2.690639 | -1.295570 |
| H | -3.211177 | -4.437890 | -2.562970 |
| C | -3.594733 | -3.444762 | -2.329470 |
| N | -3.493622 | -1.476558 | -0.990053 |
| C | -4.649986 | -2.879273 | -3.048357 |
| C | -4.502124 | -0.934761 | -1.669583 |
| H | -5.109632 | -3.436112 | -3.865718 |
| C | -5.119009 | -1.604279 | -2.727326 |
| H | -5.939536 | -1.141835 | -3.275716 |
| O | -5.728222 | 1.158717  | -1.762747 |
| C | -5.725506 | 2.433087  | -1.059765 |
| C | -4.836744 | 0.402600  | -1.151658 |
| N | -4.252614 | 0.861900  | -0.100480 |



|   |           |           |           |
|---|-----------|-----------|-----------|
| C | -4.797896 | 2.201880  | 0.152995  |
| H | -5.354147 | 3.193812  | -1.760205 |
| H | -6.760233 | 2.671296  | -0.792816 |
| H | -4.237091 | 3.669526  | 2.375468  |
| C | -3.53013  | 3.864292  | 1.564277  |
| H | -2.373913 | 5.279409  | 2.712025  |
| C | -2.482759 | 4.766109  | 1.754102  |
| C | -3.687481 | 3.205392  | 0.341414  |
| C | -1.583808 | 5.015739  | 0.718411  |
| C | -2.772262 | 3.452144  | -0.689764 |
| H | -0.769576 | 5.730719  | 0.861982  |
| C | -1.728003 | 4.354291  | -0.503756 |
| H | -2.866683 | 2.922377  | -1.643231 |
| H | -1.022252 | 4.544631  | -1.316703 |
| H | -5.385931 | 2.155195  | 1.084301  |
| H | -0.575326 | -5.089016 | 1.136989  |
| H | -2.124116 | -3.930920 | 5.246129  |
| H | -0.414983 | -2.587108 | 6.459268  |
| C | -1.342163 | -3.409848 | 4.689683  |
| C | -0.384039 | -2.655862 | 5.369881  |
| H | -2.065094 | -4.086904 | 2.776000  |
| C | -1.305022 | -3.499036 | 3.299723  |
| O | -1.289306 | -4.225269 | -0.604122 |
| C | -0.277558 | -4.294381 | 0.438649  |
| C | 0.611675  | -1.991341 | 4.655194  |
| H | 1.363142  | -1.398123 | 5.180608  |
| C | -1.905207 | -3.067999 | -0.435644 |
| C | -0.307825 | -2.835685 | 2.575094  |
| C | 0.646545  | -2.083618 | 3.264628  |
| H | 0.673674  | -4.573356 | -0.029241 |
| N | -1.469175 | -2.261368 | 0.468965  |
| C | -0.284074 | -2.887235 | 1.069748  |
| H | 1.420467  | -1.556203 | 2.698438  |

|    |           |           |           |
|----|-----------|-----------|-----------|
| H  | 0.594042  | -2.308039 | 0.727103  |
| Mg | -2.492617 | -0.294180 | 0.566492  |
| C  | 0.358375  | 1.489334  | -2.875101 |
| C  | 0.863733  | 1.355895  | -1.478211 |
| C  | -0.045086 | 1.187163  | -0.423079 |
| O  | -1.188452 | 0.678075  | -0.587004 |
| H  | 0.632747  | 3.669631  | 2.760608  |
| C  | 1.107725  | 2.676875  | 2.749020  |
| H  | 1.907181  | 2.651806  | 3.497302  |
| O  | 0.116071  | 1.710136  | 3.109002  |
| C  | -0.384079 | 1.169369  | 2.008909  |
| C  | 1.581489  | 2.276631  | 1.348171  |
| N  | 0.35481   | 1.515978  | 0.906380  |
| O  | -1.376877 | 0.449923  | 2.078353  |
| C  | 1.895641  | 3.532601  | 0.549651  |
| C  | 2.777914  | 1.340388  | 1.423465  |
| H  | 0.984106  | 4.038329  | 0.208370  |
| H  | 2.438908  | 4.228949  | 1.203653  |
| H  | 2.546858  | 3.350227  | -0.312870 |
| H  | 2.584028  | 0.483246  | 2.084494  |
| H  | 3.062258  | 0.963398  | 0.432410  |
| H  | 3.648193  | 1.879045  | 1.823156  |
| H  | 1.135263  | 1.256234  | -3.617461 |
| H  | -0.507214 | 0.840196  | -3.067201 |
| H  | 0.031582  | 2.520566  | -3.091858 |
| H  | 1.811476  | 1.843044  | -1.255727 |
| H  | 1.017601  | -2.621703 | -4.047030 |
| C  | 1.230203  | -1.659189 | -3.567587 |
| H  | 0.782038  | -0.886608 | -4.204574 |
| C  | 0.664116  | -1.577838 | -2.146127 |
| C  | 1.688611  | -0.789826 | -1.404321 |
| C  | 2.727887  | -1.422633 | -3.405072 |
| N  | 2.848061  | -0.817791 | -2.070745 |

|   |           |           |           |
|---|-----------|-----------|-----------|
| H | -0.345065 | -1.144848 | -2.078372 |
| H | 0.608856  | -2.581484 | -1.685793 |
| H | 3.317384  | -2.355085 | -3.411568 |
| H | 3.158337  | -0.766937 | -4.176007 |
| H | 1.735328  | -0.733894 | -0.312811 |
| C | 4.318405  | 1.502154  | -3.023292 |
| C | 4.812295  | 0.640823  | -1.904763 |
| H | 6.562291  | 1.846189  | -1.600625 |
| C | 6.017905  | 0.960765  | -1.269483 |
| C | 4.102743  | -0.492676 | -1.473346 |
| C | 6.511806  | 0.162404  | -0.232921 |
| C | 4.594634  | -1.320298 | -0.438073 |
| O | 7.660843  | 0.405095  | 0.426870  |
| C | 5.796643  | -0.974207 | 0.170066  |
| C | 3.850995  | -2.537882 | 0.018644  |
| H | 6.210775  | -1.592550 | 0.969213  |
| H | 3.302143  | -3.031023 | -0.795545 |
| H | 4.534177  | -3.275522 | 0.456159  |
| H | 3.114365  | -2.300059 | 0.803804  |
| H | 4.6407    | 2.543441  | -2.898865 |
| H | 4.717264  | 1.165320  | -3.993144 |
| H | 3.224853  | 1.493434  | -3.110058 |
| C | 8.427477  | 1.528117  | 0.048286  |
| H | 9.311849  | 1.536421  | 0.692136  |
| H | 8.750909  | 1.464017  | -1.002128 |
| H | 7.871741  | 2.467674  | 0.192977  |

105

ts\_XII / electronic energy: -2629.16634263 a.u. / lowest freq: -291.86 cm-1

|   |          |           |           |
|---|----------|-----------|-----------|
| C | 3.544859 | -0.818209 | -2.390199 |
| H | 3.943194 | -0.966856 | -4.515512 |
| C | 3.790717 | -1.505516 | -3.580265 |
| N | 3.355777 | -1.461660 | -1.242128 |
| C | 3.828093 | -2.900310 | -3.525531 |

|   |           |           |           |
|---|-----------|-----------|-----------|
| C | 3.371887  | -2.790576 | -1.184792 |
| H | 4.020408  | -3.472852 | -4.433800 |
| C | 3.610785  | -3.568618 | -2.318286 |
| H | 3.622127  | -4.656763 | -2.257368 |
| O | 2.961916  | -4.552824 | 0.433632  |
| C | 2.655687  | -4.662595 | 1.851365  |
| C | 3.075958  | -3.263730 | 0.179121  |
| N | 2.882214  | -2.425130 | 1.139112  |
| C | 2.505129  | -3.203964 | 2.329712  |
| H | 1.747662  | -5.269638 | 1.951666  |
| H | 3.488148  | -5.193149 | 2.327686  |
| H | 1.885027  | -1.570227 | 4.406084  |
| C | 0.993045  | -1.897533 | 3.864430  |
| H | -0.356006 | -0.753353 | 5.099101  |
| C | -0.264895 | -1.435302 | 4.250336  |
| C | 1.128827  | -2.776451 | 2.785314  |
| C | -1.402716 | -1.854972 | 3.561029  |
| C | -0.016281 | -3.181885 | 2.090141  |
| H | -2.391553 | -1.509624 | 3.874296  |
| C | -1.275387 | -2.730823 | 2.480923  |
| H | 0.072597  | -3.860422 | 1.235200  |
| H | -2.165091 | -3.079590 | 1.950329  |
| H | 3.224493  | -2.983338 | 3.133087  |
| H | 4.189694  | 3.369865  | -2.950163 |
| H | 7.265457  | 3.764815  | 0.343521  |
| H | 6.334259  | 5.269772  | 2.096739  |
| C | 6.184768  | 3.888134  | 0.441854  |
| C | 5.662536  | 4.731045  | 1.425001  |
| H | 5.744578  | 2.541791  | -1.182690 |
| C | 5.327864  | 3.203182  | -0.416155 |
| O | 3.484495  | 1.448035  | -3.251728 |
| C | 3.282034  | 2.790480  | -2.734791 |
| C | 4.282235  | 4.883250  | 1.546036  |

|    |           |           |           |
|----|-----------|-----------|-----------|
| H  | 3.868082  | 5.541690  | 2.312525  |
| C  | 3.408812  | 0.637551  | -2.212014 |
| C  | 3.939623  | 3.352419  | -0.302825 |
| C  | 3.425509  | 4.194665  | 0.686454  |
| H  | 2.440891  | 3.234505  | -3.278779 |
| N  | 3.1701    | 1.140623  | -1.050555 |
| C  | 3.018838  | 2.590725  | -1.224295 |
| H  | 2.342839  | 4.315100  | 0.782225  |
| H  | 1.975364  | 2.849650  | -0.969393 |
| Mg | 2.705549  | -0.343061 | 0.516041  |
| C  | -0.573821 | 0.252536  | -2.531824 |
| C  | -1.055261 | 0.541018  | -1.146548 |
| C  | -0.150347 | 0.367757  | -0.088763 |
| O  | 0.827919  | -0.423092 | -0.167909 |
| H  | -1.608349 | 1.405386  | 3.654467  |
| C  | -1.087116 | 2.144722  | 3.027543  |
| H  | -1.278897 | 3.149531  | 3.418712  |
| O  | 0.318292  | 1.886302  | 3.108411  |
| C  | 0.690752  | 1.171810  | 2.057282  |
| C  | -1.43513  | 1.996935  | 1.543720  |
| N  | -0.342364 | 1.034360  | 1.162038  |
| O  | 1.849512  | 0.772248  | 1.971245  |
| C  | -2.847138 | 1.460392  | 1.414088  |
| C  | -1.244915 | 3.318862  | 0.810482  |
| H  | -2.950362 | 0.468994  | 1.876357  |
| H  | -3.523996 | 2.136030  | 1.955535  |
| H  | -3.212304 | 1.419710  | 0.381502  |
| H  | -0.250714 | 3.740711  | 1.008565  |
| H  | -1.35831  | 3.212039  | -0.274943 |
| H  | -1.992231 | 4.045270  | 1.155359  |
| H  | -1.402766 | 0.065266  | -3.229712 |
| H  | -0.007365 | 1.103080  | -2.951608 |
| H  | 0.098942  | -0.616691 | -2.560407 |

|   |           |           |           |
|---|-----------|-----------|-----------|
| H | -1.818544 | 1.313913  | -1.049796 |
| H | -1.487724 | -2.213815 | -3.350080 |
| C | -2.142393 | -2.680142 | -2.602960 |
| H | -2.186506 | -3.747605 | -2.848822 |
| C | -1.614233 | -2.428086 | -1.187321 |
| C | -2.412778 | -1.264666 | -0.714513 |
| C | -3.52525  | -2.036960 | -2.623356 |
| N | -3.51433  | -1.132982 | -1.462306 |
| H | -1.836332 | -3.278169 | -0.517273 |
| H | -0.528147 | -2.264329 | -1.116729 |
| H | -3.744908 | -1.488327 | -3.550607 |
| H | -4.342911 | -2.763465 | -2.478963 |
| H | -2.46617  | -0.973722 | 0.335218  |
| C | -4.343168 | 1.144666  | -3.068308 |
| C | -5.053481 | 0.744993  | -1.814590 |
| H | -6.447408 | 2.370198  | -1.959384 |
| C | -6.149329 | 1.497667  | -1.376369 |
| C | -4.654729 | -0.373123 | -1.061512 |
| C | -6.843116 | 1.140229  | -0.216125 |
| C | -5.360069 | -0.761924 | 0.100349  |
| O | -7.902759 | 1.815140  | 0.270770  |
| C | -6.444197 | 0.008628  | 0.507783  |
| C | -4.972232 | -1.969936 | 0.895347  |
| H | -7.014705 | -0.267656 | 1.396978  |
| H | -4.566389 | -2.775816 | 0.268579  |
| H | -4.209178 | -1.735966 | 1.655077  |
| H | -5.833001 | -2.372895 | 1.442025  |
| H | -3.270822 | 0.915787  | -3.031233 |
| H | -4.750968 | 0.619298  | -3.946304 |
| H | -4.454704 | 2.217431  | -3.266932 |
| C | -8.35599  | 2.950533  | -0.434332 |
| H | -9.21665  | 3.340395  | 0.117129  |
| H | -7.582376 | 3.732376  | -0.487397 |

H -8.673648 2.694184 -1.456894
